# Supplementary material for: Molecular and behavioral studies reveal differences in olfaction between winter and summer morphs of Drosophila suzukii
Source: PeerJ. 2022 Sep 16;10:e13825. doi: 10.7717/peerj.13825 (PMC9484457; doi:10.7717/peerj.13825)
Supplement: Supplemental Information 2 — Gene annotation categories distinguisged for each differentially expressed gene found in transcriptome [file peerj-10-13825-s002.xlsx]

## Sheet: Statistics
t-Test: Two-Sample Assuming Unequal Variances		CheA87a
	Variable 1	Variable 2
Mean	4.36567	1.10786
Variance	2.43327	0.270401
Observations	5	5
Hypothesized Mean Difference	0
df	5
t Stat	4.43031
P(T<=t) one-tail	0.00341306
t Critical one-tail	2.01505
P(T<=t) two-tail	0.00682611
t Critical two-tail	2.57058
t-Test: Two-Sample Assuming Unequal Variances		Obp83ef
	Variable 1	Variable 2
Mean	0.4658	1.0312
Variance	0.0105567	0.0905057
Observations	5	5
Hypothesized Mean Difference	0
df	5
t Stat	-3.97691
P(T<=t) one-tail	0.00528158
t Critical one-tail	2.01505
P(T<=t) two-tail	0.0105632
t Critical two-tail	2.57058
t-Test: Two-Sample Assuming Unequal Variances		Obp44a
	Variable 1	Variable 2
Mean	8.56607	1.07031
Variance	6.782	0.161057
Observations	5	5
Hypothesized Mean Difference	0
df	4
t Stat	6.361
P(T<=t) one-tail	0.00156549
t Critical one-tail	2.13185
P(T<=t) two-tail	0.00313097
t Critical two-tail	2.77645

## Sheet: Average CT
Updated data
CheA87a
WINTER					AVE	STD DEV	SEM
6.5201	4.12623	4.42705	4.61794	2.13704	4.36567	1.5599	0.697606
SUMMER
1.11822	1.86175	0.882838	0.440041	1.23646	1.10786	0.520001	0.232552
Obp83ef
WINTER					AVE	STD DEV	SEM
0.335	0.553	0.584	0.448	0.409	0.466	0.102565	0.0458684
SUMMER
1.507	0.836	0.865	1.152	0.796	1.031	0.301002	0.134612
Obp44a
WINTER					AVE	STD DEV	SEM
11.8876	7.54204	7.15219	5.60857	10.64	8.56607	2.32929	1.04169
SUMMER
1.548	1.01656	1.34288	0.50263	0.941479	1.07031	0.35895	0.160527
										Expression	STERR
									Obp83ef Winter Morph	0.466	0.0458684
									Obp83ef Summer Morph	1.031	0.134612
									CheA87a Winter Morph	4.36567	0.697606
									CheA87a Summer Morph	1.10786	0.232552
									Obp44a Winter Morph	8.56607	1.04169
									Obp44 Summer Morph	1.07031	0.160527
										SM	WM	STERR SM	STERR WM
									Obp83ef	1.031	0.466	0.135	0.046
									CheA87a	1.108	4.366	0.233	0.698
									Obp44a	1.07	8.566	0.161	1.042

## Sheet: All CT Values
Plate 1: TBP, CheA87a, and Obp83ef
Sample	Primer TBP	CT Value		Sample	Primer CheA87a	CT Vaule		Sample	Primer Obp83ef	CT Value
Summer 1	TBP	26.731		Summer 1	CheA87a	30.2177		No Temp Control	Obp83ef	Undetermined
Summer 1	TBP	26.6467		Summer 1	CheA87a	29.706		No Temp Control	Obp83ef	Undetermined
Summer 1	TBP	26.448		Summer 1	CheA87a	29.9039		Summer 1	Obp83ef	27.5827
Winter 2	TBP	31.8665		No Temp Control	CheA87a	Undetermined		Summer 1	Obp83ef	27.6773
Winter 2	TBP	31.1521		Winter 2	CheA87a	38.0747		Summer 1	Obp83ef	27.588
Winter 2	TBP	32.0767		Winter 2	CheA87a	20.6948		Winter 2	Obp83ef	33.0555
Summer 2	TBP	27.836		Winter 2	CheA87a	39.5079		Winter 2	Obp83ef	33.1849
Summer 2	TBP	27.9404		Summer 2	CheA87a	33.7934		Winter 2	Obp83ef	33.5794
Summer 2	TBP	27.7935		Summer 2	CheA87a	33.7952		Summer 2	Obp83ef	28.3334
Winter 3	TBP	27.9707		Summer 2	CheA87a	32.9275		Summer 2	Obp83ef	27.8063
Winter 3	TBP	27.6992		Winter 3	CheA87a	29.5298		Summer 2	Obp83ef	28.2031
Winter 3	TBP	27.8384		Winter 3	CheA87a	29.8851		Winter 3	Obp83ef	28.5413
Summer 3	TBP	26.994		Winter 3	CheA87a	29.5429		Winter 3	Obp83ef	28.4742
Summer 3	TBP	27.1371		Summer 3	CheA87a	30.6363		Winter 3	Obp83ef	29.053
Summer 3	TBP	27.1148		Summer 3	CheA87a	31.6256		Summer 3	Obp83ef	27.4406
Winter 4	TBP	29.6651		Summer 3	CheA87a	31.1073		Summer 3	Obp83ef	27.1395
Winter 4	TBP	29.496		Winter 4	CheA87a	31.0519		Summer 3	Obp83ef	27.2875
Winter 4	TBP	29.754		Winter 4	CheA87a	31.6863		Winter 4	Obp83ef	30.4908
Winter 5	TBP	27.0047		Winter 4	CheA87a	31.3217		Winter 4	Obp83ef	30.2001
Winter 5	TBP	26.5317		Winter 5	CheA87a	28.1217		Winter 4	Obp83ef	30.5493
Winter 5	TBP	26.6256		Winter 5	CheA87a	28.741		Winter 5	Obp83ef	27.9208
Summer 5	TBP	28.1398		Winter 5	CheA87a	28.2616		Winter 5	Obp83ef	27.9744
Summer 5	TBP	28.2673		Summer 5	CheA87a	33.613		Winter 5	Obp83ef	27.739
Summer 5	TBP	28.7818		Summer 5	CheA87a	33.4499		Summer 5	Obp83ef	29.5368
Winter 6	TBP	27.3276		Summer 5	CheA87a	34.2628		Summer 5	Obp83ef	28.9225
Winter 6	TBP	27.0944		Winter 6	CheA87a	29.6268		Summer 5	Obp83ef	28.8849
Winter 6	TBP	27.1203		Winter 6	CheA87a	29.4844		Winter 6	Obp83ef	28.459
Summer 6	TBP	28.7015		Winter 6	CheA87a	30.7283		Winter 6	Obp83ef	28.563
Summer 6	TBP	27.6498		Summer 6	CheA87a	31.5278		Winter 6	Obp83ef	28.3852
Summer 6	TBP	27.9622		Summer 6	CheA87a	31.9111		Summer 6	Obp83ef	28.6702
No Temp Control	TBP	38.6603		Summer 6	CheA87a	31.5399		Summer 6	Obp83ef	28.3365
No Temp Control	TBP	Undetermined		No Temp Control	CheA87a	37.3587		Summer 6	Obp83ef	28.2892
Plate 2: CheA87a and OBP44a
Sample	Primer CheA87a	CT value		Sample	Primer Obp44a	CT value
Winter 1	CheA87a	34.6842		Winter 1	Obp44a	18.8729
Winter 1	CheA87a	34.138		Winter 1	Obp44a	13.8832
Winter 1	CheA87a	34.7973		Winter 1	Obp44a	17.3013
Summer 1	CheA87a	30.5751		Summer 1	Obp44a	19.1769
Summer 1	CheA87a	29.9192		Summer 1	Obp44a	19.3479
Summer 1	CheA87a	30.3336		Summer 1	Obp44a	19.1387
Winter 2	CheA87a	35.461		Winter 2	Obp44a	20.504
Winter 2	CheA87a	36.2384		Winter 2	Obp44a	20.7504
Winter 2	CheA87a	35.4907		Winter 2	Obp44a	20.4954
Summer 2	CheA87a	32.451		Summer 2	Obp44a	19.2809
Summer 2	CheA87a	33.4453		Summer 2	Obp44a	19.3081
Summer 2	CheA87a	31.9577		Summer 2	Obp44a	20.7262
Winter 3	CheA87a	28.8187		Winter 3	Obp44a	16.3724
Winter 3	CheA87a	29.8266		Winter 3	Obp44a	16.3518
Winter 3	CheA87a	28.7698		Winter 3	Obp44a	16.5279
Summer 3	CheA87a	31.0171		Summer 3	Obp44a	18.5344
Summer 3	CheA87a	30.898		Summer 3	Obp44a	18.734
Summer 3	CheA87a	31.3548		Summer 3	Obp44a	18.7866
Winter 4	CheA87a	32.5335		Winter 4	Obp44a	19.4124
Winter 4	CheA87a	32.1215		Winter 4	Obp44a	19.5466
Winter 4	CheA87a	31.7276		Winter 4	Obp44a	18.9914
Summer 4	CheA87a	38.9517		Summer 4	Obp44a	20.7299
Summer 4	CheA87a	36.1658		Summer 4	Obp44a	18.3689
Summer 4	CheA87a	36.6501		Summer 4	Obp44a	17.2204
Winter 5	CheA87a	29.567		Winter 5	Obp44a	17.1227
Winter 5	CheA87a	29.1329		Winter 5	Obp44a	17.3372
Winter 5	CheA87a	28.4722		Winter 5	Obp44a	17.109
Summer 5	CheA87a	32.6575		Summer 5	Obp44a	21.235
Summer 5	CheA87a	32.8056		Summer 5	Obp44a	20.924
Summer 5	CheA87a	34.5864		Summer 5	Obp44a	21.1529
Winter 6	CheA87a	29.3277		Winter 6	Obp44a	16.2562
Winter 6	CheA87a	29.5256		Winter 6	Obp44a	16.3956
Winter 6	CheA87a	29.2926		Winter 6	Obp44a	16.4415
Summer 6	CheA87a	29.4296		Summer 6	Obp44a	17.4727
Summer 6	CheA87a	29.8615		Summer 6	Obp44a	18.5814
Summer 6	CheA87a	29.7891		Summer 6	Obp44a	18.5558
NTC (No Template)	CheA87a	Undetermined		NTC (No Template)	Obp44a	Undetermined
NTC (No Template)	CheA87a	Undetermined		NTC (No Template)	Obp44a	Undetermined
NTC (No Template)	CheA87a	36.9747		NTC (No Template)	Obp44a	38.2041
				Interplate (SummerTest 3)	Obp44a	19.8325
				Interplate (SummerTest 3)	Obp44a	19.8012
				Interplate (SummerTest 3)	Obp44a	19.9467

## Sheet: Full Raw Data
Plate 1	(See column X)																						Plate 2
Sample Setup																							Sample Setup
Block Type	96-Well 0.2-mL Block																						Block Type	96-Well 0.2-mL Block
Calibration Background is expired	No																						Calibration Background is expired	No
Calibration Background performed on	03-22-2021																						Calibration Background performed on	03-22-2021
Calibration Pure Dye ABY is expired	No																						Calibration Pure Dye ABY is expired	No
Calibration Pure Dye ABY performed on	03-22-2021																						Calibration Pure Dye ABY performed on	03-22-2021
Calibration Pure Dye CY5 is expired	No																						Calibration Pure Dye CY5 is expired	No
Calibration Pure Dye CY5 performed on	03-22-2021																						Calibration Pure Dye CY5 performed on	03-22-2021
Calibration Pure Dye FAM is expired	No																						Calibration Pure Dye FAM is expired	No
Calibration Pure Dye FAM performed on	03-22-2021																						Calibration Pure Dye FAM performed on	03-22-2021
Calibration Pure Dye JUN is expired	No																						Calibration Pure Dye JUN is expired	No
Calibration Pure Dye JUN performed on	03-22-2021																						Calibration Pure Dye JUN performed on	03-22-2021
Calibration Pure Dye MUSTANG PURPLE is expired	No																						Calibration Pure Dye MUSTANG PURPLE is expired	No
Calibration Pure Dye MUSTANG PURPLE performed on	03-22-2021																						Calibration Pure Dye MUSTANG PURPLE performed on	03-22-2021
Calibration Pure Dye NED is expired	No																						Calibration Pure Dye NED is expired	No
Calibration Pure Dye NED performed on	03-22-2021																						Calibration Pure Dye NED performed on	03-22-2021
Calibration Pure Dye ROX is expired	No																						Calibration Pure Dye ROX is expired	No
Calibration Pure Dye ROX performed on	03-22-2021																						Calibration Pure Dye ROX performed on	03-22-2021
Calibration Pure Dye SYBR is expired	No																						Calibration Pure Dye SYBR is expired	No
Calibration Pure Dye SYBR performed on	03-22-2021																						Calibration Pure Dye SYBR performed on	03-22-2021
Calibration Pure Dye TAMRA is expired	No																						Calibration Pure Dye TAMRA is expired	No
Calibration Pure Dye TAMRA performed on	03-22-2021																						Calibration Pure Dye TAMRA performed on	03-22-2021
Calibration Pure Dye VIC is expired	No																						Calibration Pure Dye VIC is expired	No
Calibration Pure Dye VIC performed on	03-22-2021																						Calibration Pure Dye VIC performed on	03-22-2021
Calibration ROI is expired	No																						Calibration ROI is expired	No
Calibration ROI performed on	03-22-2021																						Calibration ROI performed on	03-22-2021
Calibration Uniformity is expired	No																						Calibration Uniformity is expired	No
Calibration Uniformity performed on	03-22-2021																						Calibration Uniformity performed on	03-22-2021
Chemistry	SYBR_GREEN																						Chemistry	SYBR_GREEN
Date Created	2021-08-12 13:30:30 PM EDT																						Date Created	2021-04-07 08:11:19 AM EDT
Experiment Barcode																							Experiment Barcode
Experiment File Name	C:\Applied Biosystems\QuantStudio Design & Analysis Software\User Files\experiments\Tim S\Fly Olfaction Full Experiment Plate 6 TBP CheA87a and Obp83ef.eds																						Experiment Comment
Experiment Name	2021-02-24_083809																						Experiment File Name	C:\Applied Biosystems\QuantStudio Design & Analysis Software\User Files\experiments\Tim S\Fly Olfaction Full Experiment Plate 4 CheA87a and OBP 44a 2021-02-24_083809.eds
Experiment Run End Time	2021-08-12 12:59:52 PM EDT																						Experiment Name	2021-02-24_083809
Experiment Type	Comparative Cт (ΔΔCт)																						Experiment Run End Time	2021-04-06 17:02:05 PM EDT
Instrument Name	272521265																						Experiment Type	Comparative Cт (ΔΔCт)
Instrument Serial Number	272521265																						Instrument Name	272521265
Instrument Type	QuantStudio™ 5 System																						Instrument Serial Number	272521265
Passive Reference	ROX																						Instrument Type	QuantStudio™ 5 System
Post-read Stage/Step																							Passive Reference	ROX
Pre-read Stage/Step																							Post-read Stage/Step
Quantification Cycle Method	Ct																						Pre-read Stage/Step
Signal Smoothing On	true																						Quantification Cycle Method	Ct
Stage where Melt Analysis is performed	Stage3																						Signal Smoothing On	true
Stage/ Cycle where Ct Analysis is performed	Stage2, Step2																						Stage where Melt Analysis is performed	Stage3
																							Stage/ Cycle where Ct Analysis is performed	Stage2, Step2
																							User Name
Well	Well Position	Sample Name	Sample Color	Biogroup Name	Biogroup Color	Target Name	Target Color	Task	Reporter	Quencher	Quantity	Comments
1	A1	Summer 1	RGB(142,56,142)			TBP	RGB(176,23,31)	UNKNOWN	SYBR	None													Well	Well Position	Sample Name	Sample Color	Biogroup Name	Biogroup Color	Target Name	Target Color	Task	Reporter	Quencher
2	A2	Summer 1	RGB(142,56,142)			TBP	RGB(176,23,31)	UNKNOWN	SYBR	None													1	A1	Winter 1	RGB(176,23,31)			CheA87a	RGB(0,0,255)	UNKNOWN	SYBR	None
3	A3	Summer 1	RGB(142,56,142)			TBP	RGB(176,23,31)	UNKNOWN	SYBR	None													2	A2	Winter 1	RGB(176,23,31)			CheA87a	RGB(0,0,255)	UNKNOWN	SYBR	None
4	A4	Winter 2	RGB(128,128,255)			TBP	RGB(176,23,31)	UNKNOWN	SYBR	None													3	A3	Winter 1	RGB(176,23,31)			CheA87a	RGB(0,0,255)	UNKNOWN	SYBR	None
5	A5	Winter 2	RGB(128,128,255)			TBP	RGB(176,23,31)	UNKNOWN	SYBR	None													4	A4	Summer 1	RGB(142,56,142)			CheA87a	RGB(0,0,255)	UNKNOWN	SYBR	None
6	A6	Winter 2	RGB(128,128,255)			TBP	RGB(176,23,31)	UNKNOWN	SYBR	None													5	A5	Summer 1	RGB(142,56,142)			CheA87a	RGB(0,0,255)	UNKNOWN	SYBR	None
7	A7	Summer 2	RGB(198,113,113)			TBP	RGB(176,23,31)	UNKNOWN	SYBR	None													6	A6	Summer 1	RGB(142,56,142)			CheA87a	RGB(0,0,255)	UNKNOWN	SYBR	None
8	A8	Summer 2	RGB(198,113,113)			TBP	RGB(176,23,31)	UNKNOWN	SYBR	None													7	A7	Winter 2	RGB(128,128,255)			CheA87a	RGB(0,0,255)	UNKNOWN	SYBR	None
9	A9	Summer 2	RGB(198,113,113)			TBP	RGB(176,23,31)	UNKNOWN	SYBR	None													8	A8	Winter 2	RGB(128,128,255)			CheA87a	RGB(0,0,255)	UNKNOWN	SYBR	None
10	A10	Winter 3	RGB(0,139,69)			TBP	RGB(176,23,31)	UNKNOWN	SYBR	None													9	A9	Winter 2	RGB(128,128,255)			CheA87a	RGB(0,0,255)	UNKNOWN	SYBR	None
11	A11	Winter 3	RGB(0,139,69)			TBP	RGB(176,23,31)	UNKNOWN	SYBR	None													10	A10	Summer 2	RGB(198,113,113)			CheA87a	RGB(0,0,255)	UNKNOWN	SYBR	None
12	A12	Winter 3	RGB(0,139,69)			TBP	RGB(176,23,31)	UNKNOWN	SYBR	None													11	A11	Summer 2	RGB(198,113,113)			CheA87a	RGB(0,0,255)	UNKNOWN	SYBR	None
13	B1	Summer 3	RGB(0,245,255)			TBP	RGB(176,23,31)	UNKNOWN	SYBR	None													12	A12	Summer 2	RGB(198,113,113)			CheA87a	RGB(0,0,255)	UNKNOWN	SYBR	None
14	B2	Summer 3	RGB(0,245,255)			TBP	RGB(176,23,31)	UNKNOWN	SYBR	None													13	B1	Winter 3	RGB(0,139,69)			CheA87a	RGB(0,0,255)	UNKNOWN	SYBR	None
15	B3	Summer 3	RGB(0,245,255)			TBP	RGB(176,23,31)	UNKNOWN	SYBR	None													14	B2	Winter 3	RGB(0,139,69)			CheA87a	RGB(0,0,255)	UNKNOWN	SYBR	None
16	B4	Winter 4	RGB(255,127,0)			TBP	RGB(176,23,31)	UNKNOWN	SYBR	None													15	B3	Winter 3	RGB(0,139,69)			CheA87a	RGB(0,0,255)	UNKNOWN	SYBR	None
17	B5	Winter 4	RGB(255,127,0)			TBP	RGB(176,23,31)	UNKNOWN	SYBR	None													16	B4	Summer 3	RGB(0,245,255)			CheA87a	RGB(0,0,255)	UNKNOWN	SYBR	None
18	B6	Winter 4	RGB(255,127,0)			TBP	RGB(176,23,31)	UNKNOWN	SYBR	None													17	B5	Summer 3	RGB(0,245,255)			CheA87a	RGB(0,0,255)	UNKNOWN	SYBR	None
19	B7	Winter 5	RGB(139,137,112)			TBP	RGB(176,23,31)	UNKNOWN	SYBR	None													18	B6	Summer 3	RGB(0,245,255)			CheA87a	RGB(0,0,255)	UNKNOWN	SYBR	None
20	B8	Winter 5	RGB(139,137,112)			TBP	RGB(176,23,31)	UNKNOWN	SYBR	None													19	B7	Winter 4	RGB(255,127,0)			CheA87a	RGB(0,0,255)	UNKNOWN	SYBR	None
21	B9	Winter 5	RGB(139,137,112)			TBP	RGB(176,23,31)	UNKNOWN	SYBR	None													20	B8	Winter 4	RGB(255,127,0)			CheA87a	RGB(0,0,255)	UNKNOWN	SYBR	None
22	B10	Summer 5	RGB(0,255,0)			TBP	RGB(176,23,31)	UNKNOWN	SYBR	None													21	B9	Winter 4	RGB(255,127,0)			CheA87a	RGB(0,0,255)	UNKNOWN	SYBR	None
23	B11	Summer 5	RGB(0,255,0)			TBP	RGB(176,23,31)	UNKNOWN	SYBR	None													22	B10	Summer 4	RGB(255,0,0)			CheA87a	RGB(0,0,255)	UNKNOWN	SYBR	None
24	B12	Summer 5	RGB(0,255,0)			TBP	RGB(176,23,31)	UNKNOWN	SYBR	None													23	B11	Summer 4	RGB(255,0,0)			CheA87a	RGB(0,0,255)	UNKNOWN	SYBR	None
25	C1	Winter 6	RGB(0,64,0)			TBP	RGB(176,23,31)	UNKNOWN	SYBR	None													24	B12	Summer 4	RGB(255,0,0)			CheA87a	RGB(0,0,255)	UNKNOWN	SYBR	None
26	C2	Winter 6	RGB(0,64,0)			TBP	RGB(176,23,31)	UNKNOWN	SYBR	None													25	C1					CheA87a	RGB(0,0,255)	NTC	SYBR	None
27	C3	Winter 6	RGB(0,64,0)			TBP	RGB(176,23,31)	UNKNOWN	SYBR	None													26	C2					CheA87a	RGB(0,0,255)	NTC	SYBR	None
28	C4	Summer 6	RGB(142,142,56)			TBP	RGB(176,23,31)	UNKNOWN	SYBR	None													27	C3					CheA87a	RGB(0,0,255)	NTC	SYBR	None
29	C5	Summer 6	RGB(142,142,56)			TBP	RGB(176,23,31)	UNKNOWN	SYBR	None													28	C4
30	C6	Summer 6	RGB(142,142,56)			TBP	RGB(176,23,31)	UNKNOWN	SYBR	None													29	C5
31	C7					TBP	RGB(176,23,31)	NTC	SYBR	None													30	C6
32	C8					TBP	RGB(176,23,31)	NTC	SYBR	None													31	C7
33	C9	Summer 1	RGB(142,56,142)			CheA87a	RGB(0,0,255)	UNKNOWN	SYBR	None													32	C8
34	C10	Summer 1	RGB(142,56,142)			CheA87a	RGB(0,0,255)	UNKNOWN	SYBR	None													33	C9
35	C11	Summer 1	RGB(142,56,142)			CheA87a	RGB(0,0,255)	UNKNOWN	SYBR	None													34	C10
36	C12					CheA87a	RGB(0,0,255)	NTC	SYBR	None													35	C11
37	D1	Winter 2	RGB(128,128,255)			CheA87a	RGB(0,0,255)	UNKNOWN	SYBR	None													36	C12
38	D2	Winter 2	RGB(128,128,255)			CheA87a	RGB(0,0,255)	UNKNOWN	SYBR	None													37	D1	Winter 5	RGB(139,137,112)			CheA87a	RGB(0,0,255)	UNKNOWN	SYBR	None
39	D3	Winter 2	RGB(128,128,255)			CheA87a	RGB(0,0,255)	UNKNOWN	SYBR	None													38	D2	Winter 5	RGB(139,137,112)			CheA87a	RGB(0,0,255)	UNKNOWN	SYBR	None
40	D4	Summer 2	RGB(198,113,113)			CheA87a	RGB(0,0,255)	UNKNOWN	SYBR	None													39	D3	Winter 5	RGB(139,137,112)			CheA87a	RGB(0,0,255)	UNKNOWN	SYBR	None
41	D5	Summer 2	RGB(198,113,113)			CheA87a	RGB(0,0,255)	UNKNOWN	SYBR	None													40	D4	Summer 5	RGB(0,255,0)			CheA87a	RGB(0,0,255)	UNKNOWN	SYBR	None
42	D6	Summer 2	RGB(198,113,113)			CheA87a	RGB(0,0,255)	UNKNOWN	SYBR	None													41	D5	Summer 5	RGB(0,255,0)			CheA87a	RGB(0,0,255)	UNKNOWN	SYBR	None
43	D7	Winter 3	RGB(0,139,69)			CheA87a	RGB(0,0,255)	UNKNOWN	SYBR	None													42	D6	Summer 5	RGB(0,255,0)			CheA87a	RGB(0,0,255)	UNKNOWN	SYBR	None
44	D8	Winter 3	RGB(0,139,69)			CheA87a	RGB(0,0,255)	UNKNOWN	SYBR	None													43	D7	Winter 6	RGB(0,64,0)			CheA87a	RGB(0,0,255)	UNKNOWN	SYBR	None
45	D9	Winter 3	RGB(0,139,69)			CheA87a	RGB(0,0,255)	UNKNOWN	SYBR	None													44	D8	Winter 6	RGB(0,64,0)			CheA87a	RGB(0,0,255)	UNKNOWN	SYBR	None
46	D10	Summer 3	RGB(0,245,255)			CheA87a	RGB(0,0,255)	UNKNOWN	SYBR	None													45	D9	Winter 6	RGB(0,64,0)			CheA87a	RGB(0,0,255)	UNKNOWN	SYBR	None
47	D11	Summer 3	RGB(0,245,255)			CheA87a	RGB(0,0,255)	UNKNOWN	SYBR	None													46	D10	Summer 6	RGB(142,142,56)			CheA87a	RGB(0,0,255)	UNKNOWN	SYBR	None
48	D12	Summer 3	RGB(0,245,255)			CheA87a	RGB(0,0,255)	UNKNOWN	SYBR	None													47	D11	Summer 6	RGB(142,142,56)			CheA87a	RGB(0,0,255)	UNKNOWN	SYBR	None
49	E1	Winter 4	RGB(255,127,0)			CheA87a	RGB(0,0,255)	UNKNOWN	SYBR	None													48	D12	Summer 6	RGB(142,142,56)			CheA87a	RGB(0,0,255)	UNKNOWN	SYBR	None
50	E2	Winter 4	RGB(255,127,0)			CheA87a	RGB(0,0,255)	UNKNOWN	SYBR	None													49	E1	Winter 1	RGB(176,23,31)			Obp44a	RGB(0,139,69)	UNKNOWN	SYBR	None
51	E3	Winter 4	RGB(255,127,0)			CheA87a	RGB(0,0,255)	UNKNOWN	SYBR	None													50	E2	Winter 1	RGB(176,23,31)			Obp44a	RGB(0,139,69)	UNKNOWN	SYBR	None
52	E4	Winter 5	RGB(139,137,112)			CheA87a	RGB(0,0,255)	UNKNOWN	SYBR	None													51	E3	Winter 1	RGB(176,23,31)			Obp44a	RGB(0,139,69)	UNKNOWN	SYBR	None
53	E5	Winter 5	RGB(139,137,112)			CheA87a	RGB(0,0,255)	UNKNOWN	SYBR	None													52	E4	Summer 1	RGB(142,56,142)			Obp44a	RGB(0,139,69)	UNKNOWN	SYBR	None
54	E6	Winter 5	RGB(139,137,112)			CheA87a	RGB(0,0,255)	UNKNOWN	SYBR	None													53	E5	Summer 1	RGB(142,56,142)			Obp44a	RGB(0,139,69)	UNKNOWN	SYBR	None
55	E7	Summer 5	RGB(0,255,0)			CheA87a	RGB(0,0,255)	UNKNOWN	SYBR	None													54	E6	Summer 1	RGB(142,56,142)			Obp44a	RGB(0,139,69)	UNKNOWN	SYBR	None
56	E8	Summer 5	RGB(0,255,0)			CheA87a	RGB(0,0,255)	UNKNOWN	SYBR	None													55	E7	Winter 2	RGB(128,128,255)			Obp44a	RGB(0,139,69)	UNKNOWN	SYBR	None
57	E9	Summer 5	RGB(0,255,0)			CheA87a	RGB(0,0,255)	UNKNOWN	SYBR	None													56	E8	Winter 2	RGB(128,128,255)			Obp44a	RGB(0,139,69)	UNKNOWN	SYBR	None
58	E10	Winter 6	RGB(0,64,0)			CheA87a	RGB(0,0,255)	UNKNOWN	SYBR	None													57	E9	Winter 2	RGB(128,128,255)			Obp44a	RGB(0,139,69)	UNKNOWN	SYBR	None
59	E11	Winter 6	RGB(0,64,0)			CheA87a	RGB(0,0,255)	UNKNOWN	SYBR	None													58	E10	Summer 2	RGB(198,113,113)			Obp44a	RGB(0,139,69)	UNKNOWN	SYBR	None
60	E12	Winter 6	RGB(0,64,0)			CheA87a	RGB(0,0,255)	UNKNOWN	SYBR	None													59	E11	Summer 2	RGB(198,113,113)			Obp44a	RGB(0,139,69)	UNKNOWN	SYBR	None
61	F1	Summer 6	RGB(142,142,56)			CheA87a	RGB(0,0,255)	UNKNOWN	SYBR	None													60	E12	Summer 2	RGB(198,113,113)			Obp44a	RGB(0,139,69)	UNKNOWN	SYBR	None
62	F2	Summer 6	RGB(142,142,56)			CheA87a	RGB(0,0,255)	UNKNOWN	SYBR	None													61	F1	Winter 3	RGB(0,139,69)			Obp44a	RGB(0,139,69)	UNKNOWN	SYBR	None
63	F3	Summer 6	RGB(142,142,56)			CheA87a	RGB(0,0,255)	UNKNOWN	SYBR	None													62	F2	Winter 3	RGB(0,139,69)			Obp44a	RGB(0,139,69)	UNKNOWN	SYBR	None
64	F4					CheA87a	RGB(0,0,255)	NTC	SYBR	None													63	F3	Winter 3	RGB(0,139,69)			Obp44a	RGB(0,139,69)	UNKNOWN	SYBR	None
65	F5					Obp83ef	RGB(255,0,128)	NTC	SYBR	None													64	F4	Summer 3	RGB(0,245,255)			Obp44a	RGB(0,139,69)	UNKNOWN	SYBR	None
66	F6					Obp83ef	RGB(255,0,128)	NTC	SYBR	None													65	F5	Summer 3	RGB(0,245,255)			Obp44a	RGB(0,139,69)	UNKNOWN	SYBR	None
67	F7	Summer 1	RGB(142,56,142)			Obp83ef	RGB(255,0,128)	UNKNOWN	SYBR	None													66	F6	Summer 3	RGB(0,245,255)			Obp44a	RGB(0,139,69)	UNKNOWN	SYBR	None
68	F8	Summer 1	RGB(142,56,142)			Obp83ef	RGB(255,0,128)	UNKNOWN	SYBR	None													67	F7	Winter 4	RGB(255,127,0)			Obp44a	RGB(0,139,69)	UNKNOWN	SYBR	None
69	F9	Summer 1	RGB(142,56,142)			Obp83ef	RGB(255,0,128)	UNKNOWN	SYBR	None													68	F8	Winter 4	RGB(255,127,0)			Obp44a	RGB(0,139,69)	UNKNOWN	SYBR	None
70	F10	Winter 2	RGB(128,128,255)			Obp83ef	RGB(255,0,128)	UNKNOWN	SYBR	None													69	F9	Winter 4	RGB(255,127,0)			Obp44a	RGB(0,139,69)	UNKNOWN	SYBR	None
71	F11	Winter 2	RGB(128,128,255)			Obp83ef	RGB(255,0,128)	UNKNOWN	SYBR	None													70	F10	Summer 4	RGB(255,0,0)			Obp44a	RGB(0,139,69)	UNKNOWN	SYBR	None
72	F12	Winter 2	RGB(128,128,255)			Obp83ef	RGB(255,0,128)	UNKNOWN	SYBR	None													71	F11	Summer 4	RGB(255,0,0)			Obp44a	RGB(0,139,69)	UNKNOWN	SYBR	None
73	G1	Summer 2	RGB(198,113,113)			Obp83ef	RGB(255,0,128)	UNKNOWN	SYBR	None													72	F12	Summer 4	RGB(255,0,0)			Obp44a	RGB(0,139,69)	UNKNOWN	SYBR	None
74	G2	Summer 2	RGB(198,113,113)			Obp83ef	RGB(255,0,128)	UNKNOWN	SYBR	None													73	G1	Winter 5	RGB(139,137,112)			Obp44a	RGB(0,139,69)	UNKNOWN	SYBR	None
75	G3	Summer 2	RGB(198,113,113)			Obp83ef	RGB(255,0,128)	UNKNOWN	SYBR	None													74	G2	Winter 5	RGB(139,137,112)			Obp44a	RGB(0,139,69)	UNKNOWN	SYBR	None
76	G4	Winter 3	RGB(0,139,69)			Obp83ef	RGB(255,0,128)	UNKNOWN	SYBR	None													75	G3	Winter 5	RGB(139,137,112)			Obp44a	RGB(0,139,69)	UNKNOWN	SYBR	None
77	G5	Winter 3	RGB(0,139,69)			Obp83ef	RGB(255,0,128)	UNKNOWN	SYBR	None													76	G4	Summer 5	RGB(0,255,0)			Obp44a	RGB(0,139,69)	UNKNOWN	SYBR	None
78	G6	Winter 3	RGB(0,139,69)			Obp83ef	RGB(255,0,128)	UNKNOWN	SYBR	None													77	G5	Summer 5	RGB(0,255,0)			Obp44a	RGB(0,139,69)	UNKNOWN	SYBR	None
79	G7	Summer 3	RGB(0,245,255)			Obp83ef	RGB(255,0,128)	UNKNOWN	SYBR	None													78	G6	Summer 5	RGB(0,255,0)			Obp44a	RGB(0,139,69)	UNKNOWN	SYBR	None
80	G8	Summer 3	RGB(0,245,255)			Obp83ef	RGB(255,0,128)	UNKNOWN	SYBR	None													79	G7	Winter 6	RGB(0,64,0)			Obp44a	RGB(0,139,69)	UNKNOWN	SYBR	None
81	G9	Summer 3	RGB(0,245,255)			Obp83ef	RGB(255,0,128)	UNKNOWN	SYBR	None													80	G8	Winter 6	RGB(0,64,0)			Obp44a	RGB(0,139,69)	UNKNOWN	SYBR	None
82	G10	Winter 4	RGB(255,127,0)			Obp83ef	RGB(255,0,128)	UNKNOWN	SYBR	None													81	G9	Winter 6	RGB(0,64,0)			Obp44a	RGB(0,139,69)	UNKNOWN	SYBR	None
83	G11	Winter 4	RGB(255,127,0)			Obp83ef	RGB(255,0,128)	UNKNOWN	SYBR	None													82	G10	Summer 6	RGB(142,142,56)			Obp44a	RGB(0,139,69)	UNKNOWN	SYBR	None
84	G12	Winter 4	RGB(255,127,0)			Obp83ef	RGB(255,0,128)	UNKNOWN	SYBR	None													83	G11	Summer 6	RGB(142,142,56)			Obp44a	RGB(0,139,69)	UNKNOWN	SYBR	None
85	H1	Winter 5	RGB(139,137,112)			Obp83ef	RGB(255,0,128)	UNKNOWN	SYBR	None													84	G12	Summer 6	RGB(142,142,56)			Obp44a	RGB(0,139,69)	UNKNOWN	SYBR	None
86	H2	Winter 5	RGB(139,137,112)			Obp83ef	RGB(255,0,128)	UNKNOWN	SYBR	None													85	H1					Obp44a	RGB(0,139,69)	NTC	SYBR	None
87	H3	Winter 5	RGB(139,137,112)			Obp83ef	RGB(255,0,128)	UNKNOWN	SYBR	None													86	H2					Obp44a	RGB(0,139,69)	NTC	SYBR	None
88	H4	Summer 5	RGB(0,255,0)			Obp83ef	RGB(255,0,128)	UNKNOWN	SYBR	None													87	H3					Obp44a	RGB(0,139,69)	NTC	SYBR	None
89	H5	Summer 5	RGB(0,255,0)			Obp83ef	RGB(255,0,128)	UNKNOWN	SYBR	None													88	H4
90	H6	Summer 5	RGB(0,255,0)			Obp83ef	RGB(255,0,128)	UNKNOWN	SYBR	None													89	H5
91	H7	Winter 6	RGB(0,64,0)			Obp83ef	RGB(255,0,128)	UNKNOWN	SYBR	None													90	H6
92	H8	Winter 6	RGB(0,64,0)			Obp83ef	RGB(255,0,128)	UNKNOWN	SYBR	None													91	H7
93	H9	Winter 6	RGB(0,64,0)			Obp83ef	RGB(255,0,128)	UNKNOWN	SYBR	None													92	H8
94	H10	Summer 6	RGB(142,142,56)			Obp83ef	RGB(255,0,128)	UNKNOWN	SYBR	None													93	H9
95	H11	Summer 6	RGB(142,142,56)			Obp83ef	RGB(255,0,128)	UNKNOWN	SYBR	None													94	H10	SummerTest 3	RGB(0,0,255)			Obp44a	RGB(0,139,69)	UNKNOWN	SYBR	None
96	H12	Summer 6	RGB(142,142,56)			Obp83ef	RGB(255,0,128)	UNKNOWN	SYBR	None													95	H11	SummerTest 3	RGB(0,0,255)			Obp44a	RGB(0,139,69)	UNKNOWN	SYBR	None
																							96	H12	SummerTest 3	RGB(0,0,255)			Obp44a	RGB(0,139,69)	UNKNOWN	SYBR	None
Plate 6 Raw Data																							Plate 4 Raw Data
																							Block Type	96-Well 0.2-mL Block
Block Type	96-Well 0.2-mL Block																						Calibration Background is expired	No
Calibration Background is expired	No																						Calibration Background performed on	03-22-2021
Calibration Background performed on	03-22-2021																						Calibration Pure Dye ABY is expired	No
Calibration Pure Dye ABY is expired	No																						Calibration Pure Dye ABY performed on	03-22-2021
Calibration Pure Dye ABY performed on	03-22-2021																						Calibration Pure Dye CY5 is expired	No
Calibration Pure Dye CY5 is expired	No																						Calibration Pure Dye CY5 performed on	03-22-2021
Calibration Pure Dye CY5 performed on	03-22-2021																						Calibration Pure Dye FAM is expired	No
Calibration Pure Dye FAM is expired	No																						Calibration Pure Dye FAM performed on	03-22-2021
Calibration Pure Dye FAM performed on	03-22-2021																						Calibration Pure Dye JUN is expired	No
Calibration Pure Dye JUN is expired	No																						Calibration Pure Dye JUN performed on	03-22-2021
Calibration Pure Dye JUN performed on	03-22-2021																						Calibration Pure Dye MUSTANG PURPLE is expired	No
Calibration Pure Dye MUSTANG PURPLE is expired	No																						Calibration Pure Dye MUSTANG PURPLE performed on	03-22-2021
Calibration Pure Dye MUSTANG PURPLE performed on	03-22-2021																						Calibration Pure Dye NED is expired	No
Calibration Pure Dye NED is expired	No																						Calibration Pure Dye NED performed on	03-22-2021
Calibration Pure Dye NED performed on	03-22-2021																						Calibration Pure Dye ROX is expired	No
Calibration Pure Dye ROX is expired	No																						Calibration Pure Dye ROX performed on	03-22-2021
Calibration Pure Dye ROX performed on	03-22-2021																						Calibration Pure Dye SYBR is expired	No
Calibration Pure Dye SYBR is expired	No																						Calibration Pure Dye SYBR performed on	03-22-2021
Calibration Pure Dye SYBR performed on	03-22-2021																						Calibration Pure Dye TAMRA is expired	No
Calibration Pure Dye TAMRA is expired	No																						Calibration Pure Dye TAMRA performed on	03-22-2021
Calibration Pure Dye TAMRA performed on	03-22-2021																						Calibration Pure Dye VIC is expired	No
Calibration Pure Dye VIC is expired	No																						Calibration Pure Dye VIC performed on	03-22-2021
Calibration Pure Dye VIC performed on	03-22-2021																						Calibration ROI is expired	No
Calibration ROI is expired	No																						Calibration ROI performed on	03-22-2021
Calibration ROI performed on	03-22-2021																						Calibration Uniformity is expired	No
Calibration Uniformity is expired	No																						Calibration Uniformity performed on	03-22-2021
Calibration Uniformity performed on	03-22-2021																						Chemistry	SYBR_GREEN
Chemistry	SYBR_GREEN																						Date Created	2021-04-07 08:11:19 AM EDT
Date Created	2021-08-12 13:30:31 PM EDT																						Experiment Barcode
Experiment Barcode																							Experiment Comment
Experiment File Name	C:\Applied Biosystems\QuantStudio Design & Analysis Software\User Files\experiments\Tim S\Fly Olfaction Full Experiment Plate 6 TBP CheA87a and Obp83ef.eds																						Experiment File Name	C:\Applied Biosystems\QuantStudio Design & Analysis Software\User Files\experiments\Tim S\Fly Olfaction Full Experiment Plate 4 CheA87a and OBP 44a 2021-02-24_083809.eds
Experiment Name	2021-02-24_083809																						Experiment Name	2021-02-24_083809
Experiment Run End Time	2021-08-12 12:59:52 PM EDT																						Experiment Run End Time	2021-04-06 17:02:05 PM EDT
Experiment Type	Comparative Cт (ΔΔCт)																						Experiment Type	Comparative Cт (ΔΔCт)
Instrument Name	272521265																						Instrument Name	272521265
Instrument Serial Number	272521265																						Instrument Serial Number	272521265
Instrument Type	QuantStudio™ 5 System																						Instrument Type	QuantStudio™ 5 System
Passive Reference	ROX																						Passive Reference	ROX
Post-read Stage/Step																							Post-read Stage/Step
Pre-read Stage/Step																							Pre-read Stage/Step
Quantification Cycle Method	Ct																						Quantification Cycle Method	Ct
Signal Smoothing On	true																						Signal Smoothing On	true
Stage where Melt Analysis is performed	Stage3																						Stage where Melt Analysis is performed	Stage3
Stage/ Cycle where Ct Analysis is performed	Stage2, Step2																						Stage/ Cycle where Ct Analysis is performed	Stage2, Step2
																							User Name
Well	Well Position	Cycle	x1-m1	x2-m2	x3-m3	x4-m4	x5-m5																Well	Well Position	Cycle	x1-m1	x2-m2	x3-m3	x4-m4	x5-m5
1	A1	1	52607.2	8201.49	8042.78	115652	-1430.55																1	A1	1	835116	134896	12926.8	142892	-484.078
2	A2	1	60985.6	8377.02	8498.56	115597	-39.7767																2	A2	1	874019	124231	13591.3	144304	638.921
3	A3	1	60936.5	7481.2	9911.58	115113	-2086.86																3	A3	1	844070	108225	15084.2	136656	-638.381
4	A4	1	666291	79569.3	11745.6	118731	18.3462																4	A4	1	51726.5	4579.16	14318.5	132145	861.497
5	A5	1	661200	74879.3	12485.7	114018	-911.348																5	A5	1	55620.3	4722.18	15740.8	132554	257.766
6	A6	1	646094	70857.1	11701.8	110059	-1036.39																6	A6	1	58900	4315.76	15199.1	131282	-658.908
7	A7	1	47827.1	6153.27	10763.5	107003	-1246.49																7	A7	1	794119	87997.5	16796.3	134515	-773.481
8	A8	1	49619.7	5930.01	12127.5	115011	-1838.71																8	A8	1	880943	98691.8	17192.6	140647	-792.924
9	A9	1	42424.3	6070.92	11350.4	115335	-3064.96																9	A9	1	782608	92101.9	15353.5	130625	-1842.69
10	A10	1	45722.1	6271.42	10479.1	113605	-1838.84																10	A10	1	44008.5	4575.57	13431.1	135474	-1077.81
11	A11	1	50665	7750.65	8910.87	111905	-1910.43																11	A11	1	52502	5999.6	13234.9	146153	-971.183
12	A12	1	48267.6	7862.95	8387.41	116352	-2213.76																12	A12	1	58180.5	6486.94	12188.7	143043	-1124.32
13	B1	1	58538.4	9075.38	9227.27	124464	-2293.42																13	B1	1	73426.9	6711.37	13263	145754	-758.166
14	B2	1	51097.2	6985.23	8768.32	101836	-1455.45																14	B2	1	112407	31319.4	15975.1	136527	-275.463
15	B3	1	50208.3	5794.99	10276.3	107910	-865.868																15	B3	1	100752	9149.13	13735.6	124552	-207.846
16	B4	1	601838	66895.2	11726.9	112320	-397.869																16	B4	1	48717.2	4676.91	13712.8	123570	197.044
17	B5	1	622802	65346.9	11541	102326	46.3286																17	B5	1	84489.1	5675.19	14740.9	117859	719.721
18	B6	1	575666	58621.6	11151.5	97828.2	-180.071																18	B6	1	42571.1	3945.82	13991	118014	574.088
19	B7	1	124925	13580.5	13548.5	111760	-1624.43																19	B7	1	852532	87691.3	16536.2	124101	-602.002
20	B8	1	129944	13144.1	11177.5	102618	-542.73																20	B8	1	873752	91362.8	15593.8	124002	321.69
21	B9	1	133873	14786.8	11392.3	110568	-527.519																21	B9	1	856992	94588.1	15498	128120	-384.139
22	B10	1	44791.3	6143.46	9140.69	93018.9	-959.57																22	B10	1	719134	86777.9	13737.2	116561	636.093
23	B11	1	38519.5	4855.25	8933.79	106604	-1602.32																23	B11	1	698159	93232.2	12591	113953	-302.959
24	B12	1	34423.7	5521.78	7592.16	96417.4	-1153.98																24	B12	1	710972	108624	11288.4	115461	-370.082
25	C1	1	51064.7	7828	8926.2	105899	-1325.45																25	C1	1	62600	6789.72	12637	131137	-511.639
26	C2	1	53583.8	7326.89	9930.53	105097	718.852																26	C2	1	62346.1	6254.83	13648	125807	4003.12
27	C3	1	49517.7	6134.11	9966.9	100282	-2283.71																27	C3	1	52467.1	5999.53	12955	114297	-827.062
28	C4	1	38837.4	4230.96	11548.6	106357	-155.931																28	C4	1	37757.5	2844.83	1993.66	2450.53	2294.45
29	C5	1	53364.2	5410.71	11185.9	98983.9	146.386																29	C5	1	29814.8	2023.1	1239.28	2034.7	1095.4
30	C6	1	-10663.2	4137.13	10621	95449.2	-545.799																30	C6	1	-25300.5	2511.03	1174.85	1748.05	1295.5
31	C7	1	47478.4	5021.56	11581.1	95886.9	-1333.59																31	C7	1	29401.1	2461.12	1909.86	1967.08	533.743
32	C8	1	43343	5342.37	12273.6	100501	-1294.35																32	C8	1	34338.7	2470.49	1983.74	2205.11	840.629
33	C9	1	12201.4	1671.86	9949.19	90842.6	-1069.6																33	C9	1	25413.5	2449.01	1272.03	1700.78	-435.995
34	C10	1	14073.3	1871.58	9342.4	94087.6	-1376.3																34	C10	1	34805.8	2601.97	1499.14	2051.65	1800.99
35	C11	1	12817.9	2215.74	8863.27	95285.1	-1180.99																35	C11	1	51526	4826.7	2458.6	3708.73	2734.11
36	C12	1	10593.5	2516.15	7500.9	95577.7	-432.629																36	C12	1	38153.3	3372.3	1198.11	2506.29	2529.55
37	D1	1	403337	56280.5	6381.93	75546.2	447.56																37	D1	1	128359	15221.8	11760.5	131319	1438.31
38	D2	1	492896	61479.9	11756.4	123029	289.405																38	D2	1	162486	18337.7	12435.9	120972	1382.5
39	D3	1	553237	61831.3	10826.8	97487.2	267.01																39	D3	1	138313	14463.5	12240.8	105556	619.992
40	D4	1	13454.3	1539.09	10123	91895.6	-328.562																40	D4	1	43826.8	3467.38	13768.3	112904	417.876
41	D5	1	15057.6	1728.55	10476.9	91268.7	2459.42																41	D5	1	60072.6	12349.9	14370.6	107440	544.369
42	D6	1	15577.8	1933.43	10665.2	90515	-360.514																42	D6	1	45778.3	6509.6	14097.4	107682	-209.522
43	D7	1	12604	1557.33	10650.5	88826.3	-1219.92																43	D7	1	37791.9	3636.97	13609.5	106526	-623.307
44	D8	1	15555.9	1803.41	10872.8	91399.8	-635.05																44	D8	1	55189.4	8406.25	14853.4	108469	1617.35
45	D9	1	11874.9	2143.2	11014.4	96528	-890.722																45	D9	1	38803.8	3585.7	13309.4	106719	-335.365
46	D10	1	21709.1	3889.36	9342.24	92049.9	95.5795																46	D10	1	42233.6	4221.42	13136.5	110636	849.008
47	D11	1	28306.4	6315.08	9838.99	105865	-2145.38																47	D11	1	46952.7	4431.16	12470.5	119481	-856.906
48	D12	1	11323	2076.49	8055.03	97804.5	-1426.72																48	D12	1	42019.4	3693.84	10436.4	110683	-728.544
49	E1	1	409879	56965.7	9777.63	119625	81.2297																49	E1	1	859324	119290	14024.2	143029	853.822
50	E2	1	408459	50060.2	10036.4	110231	-445.227																50	E2	1	828726	101105	14291.6	127174	1654.62
51	E3	1	549891	60657.4	10719.3	106623	711.588																51	E3	1	760704	84014.9	14299.9	118211	1533.28
52	E4	1	91074	9408.42	10458.8	93113.6	-114.314																52	E4	1	73033.2	9869.98	13789.4	106229	316.047
53	E5	1	77346.6	8006.32	10429.6	89275.4	-42.2067																53	E5	1	44024	5354.73	12852	97813.9	594.915
54	E6	1	80611.8	8172.95	10413.6	87247.1	-642.912																54	E6	1	42404.9	4770.77	13599.8	101854	227.734
55	E7	1	16830.9	1738.45	10696.9	90747.6	699.601																55	E7	1	648950	63876.4	14684.5	105482	1125.5
56	E8	1	88560.8	14563.5	10985.8	89884.2	-756.549																56	E8	1	610483	60492.6	13518.3	100614	-11.8575
57	E9	1	14803.2	1581.03	10630	97108.2	-565.334																57	E9	1	640207	66345.2	13703.2	109281	-154.794
58	E10	1	17089.8	2667.76	9847.08	96796.2	-566.178																58	E10	1	50205.7	5832.38	11990.5	105823	160.803
59	E11	1	17373.6	2677.21	9995.68	106962	-148.143																59	E11	1	63358.4	7603.82	13488.8	115531	854.088
60	E12	1	14704.8	2328.61	8186.14	100797	-1028.21																60	E12	1	70924.6	9623.76	11144.6	117510	365.089
61	F1	1	20214.1	3260.11	10567.7	131046	-1164.95																61	F1	1	91928.5	11447.3	15678.2	156767	317.001
62	F2	1	22229.6	2950.66	10279.2	116498	-1343.45																62	F2	1	74417.3	8752.02	13655.4	132445	-382.483
63	F3	1	19580.8	3477.74	10853.1	104905	-1534.74																63	F3	1	71096.5	7580.68	14423.5	123277	-718.952
64	F4	1	18149.8	2229.27	12366	112582	372.464																64	F4	1	61800.1	7387.17	14371.7	114548	1387.61
65	F5	1	26502.6	3286.9	10838.3	96486.3	-284.288																65	F5	1	54458	5512	13135.8	106412	952.125
66	F6	1	24837.1	2585.24	11375.3	97602.9	-527.215																66	F6	1	57030.5	5362.26	14457.4	111883	192.314
67	F7	1	25318.3	3141.68	10910.5	92283.3	-782.478																67	F7	1	707609	69778.6	14837.7	107699	2610
68	F8	1	28528	3610.18	12381.1	101211	-795.489																68	F8	1	854422	85618.7	16874	123471	-167.483
69	F9	1	30387.8	3329.7	11083	103208	1159.69																69	F9	1	811483	86890.4	15891.9	122137	4344.92
70	F10	1	550529	61917.7	10131.9	102366	-973.606																70	F10	1	787477	88531.1	14280.5	112922	-39.7933
71	F11	1	612784	75548.8	10486.2	106390	277.033																71	F11	1	796525	98512.6	14039.5	121653	1460.21
72	F12	1	587392	83644.1	9642.1	106856	-2203.97																72	F12	1	810640	114299	13047.9	128476	-1090.88
73	G1	1	35598.6	5338.5	11303.1	132988	-2032.77																73	G1	1	240687	32726.8	15807.4	167826	-733.077
74	G2	1	31324.9	4234.51	10201.3	119302	-1268.75																74	G2	1	200401	26616.9	16410.9	160945	-86.3175
75	G3	1	27629.8	4073.58	10996.8	115050	-1250.18																75	G3	1	193166	27432.9	15945.4	135416	-479.116
76	G4	1	31332.4	4287.24	11030.5	111470	-2101.68																76	G4	1	101998	19790.1	16080.9	136116	-1400.63
77	G5	1	26054.1	3183.84	10646.7	95077.4	-462.314																77	G5	1	52898	5626.82	14050.6	114162	506.087
78	G6	1	27423	4469.35	11449.8	102047	-1213.61																78	G6	1	71913.9	12189.7	15299	112604	992.706
79	G7	1	26893.4	3486.32	10791.5	94696.2	-44.2182																79	G7	1	57974.4	6488.58	13337.6	107181	590.593
80	G8	1	28106.8	3471.74	11195.7	103461	-1589.6																80	G8	1	62529.8	6954.12	14742.1	119851	-141.449
81	G9	1	28085.8	3887.53	10888.8	103152	145.902																81	G9	1	66359	8305.12	15146.5	124734	1608.63
82	G10	1	598586	71620.7	10980.7	100226	-344.841																82	G10	1	75134.6	8181.51	25294.4	239403	576.919
83	G11	1	576432	75741.8	9609.15	98076.2	-1139.08																83	G11	1	65302.6	7903.91	12946.1	122759	272.471
84	G12	1	725152	106868	11453.2	122552	-2642.47																84	G12	1	76200.6	11179.3	14933.9	157057	-1608.06
85	H1	1	126098	21289.5	9242.62	129462	-985.167																85	H1	1	81459.2	11558.2	12875.8	156760	623.603
86	H2	1	119505	18267.6	9239.86	122039	-1732.27																86	H2	1	79630.2	10744.9	14349.5	165155	-32.7047
87	H3	1	109712	14015.8	9938.78	117370	-1764.81																87	H3	1	73321.5	11859	13818.6	135476	-63.1884
88	H4	1	28879.6	4770.75	9887.31	114340	-210.871																88	H4	1	36357.3	3694	1354.97	2698.58	1758.99
89	H5	1	34875	5173.21	11851.3	111999	-1013.9																89	H5	1	43996	5002.51	2695.88	3624.44	2019.26
90	H6	1	33316	4502.44	12119.5	119612	-1161.97																90	H6	1	138032	11445.5	5573.47	5045.25	3129.86
91	H7	1	28502.9	4208.53	11952.6	113181	-2067.99																91	H7	1	29512	3158.24	2102.35	2139.94	1305.72
92	H8	1	30433.7	4209.13	12401.5	118800	-443.937																92	H8	1	38780.5	3039.08	1887.03	2650.17	3032.87
93	H9	1	28582.8	4063.26	10275.5	107493	-928.914																93	H9	1	43484.9	4236.89	1874.7	2616.28	2484.72
94	H10	1	26304.2	3993.86	9622.36	106858	384.387																94	H10	1	60710.5	7162.04	14513.9	130496	703.167
95	H11	1	30188.9	4921.33	9093.72	117723	-1578.9																95	H11	1	67166.6	8689.22	12961.3	146621	-558.97
96	H12	1	29330.5	5642.3	8694.2	119629	-1579.69																96	H12	1	90536.1	16793.4	12652.4	146028	-571.859
1	A1	2	54294.5	8735.57	8615.51	116381	-863.118																1	A1	2	816751	131595	13528	143946	-293.323
2	A2	2	62460.1	8285.43	8631.74	114721	-43.6333																2	A2	2	841633	119796	13776.1	142484	229.855
3	A3	2	62232.7	7375.93	10099.8	112061	-1349.81																3	A3	2	808723	104198	14354.2	135123	-798.137
4	A4	2	634973	75842.3	11564.9	115531	-57.6826																4	A4	2	52072	4698.27	13814	131394	743.792
5	A5	2	620013	70431.1	12097.1	109884	-662.883																5	A5	2	55630.4	5044.83	15049.6	130115	515.38
6	A6	2	613076	67564.8	11296.3	107695	-1138.61																6	A6	2	59066.7	4707.14	14416	129427	-598.016
7	A7	2	49828.5	6809.16	11183.7	105769	-1059.45																7	A7	2	757502	83610.8	15464.7	130787	-631.241
8	A8	2	51024.8	7137.95	12224	113549	-1432.75																8	A8	2	823345	92667.8	16330	135130	-725.19
9	A9	2	44098	6235.67	10816.4	111178	-2880.65																9	A9	2	772341	91833.6	15061.4	131108	-1829.6
10	A10	2	49260.5	6774.33	9756.65	109778	-1657.77																10	A10	2	43777.2	4547.85	12610.1	132539	-1020.88
11	A11	2	53775.7	8532.58	8365.46	107777	-2066.81																11	A11	2	50617.5	5845.16	12534.1	141120	-822.708
12	A12	2	51611.7	8131.31	8100.29	115138	-2085.66																12	A12	2	57508.5	6402.11	11743.5	140045	-1075.7
13	B1	2	59155.1	8847.46	9188.14	123532	-2401.74																13	B1	2	71508.7	6604.87	12589.9	146005	-1065.76
14	B2	2	52092.4	7294.34	8450.54	99846.9	-1358.01																14	B2	2	128854	40174.1	16482.2	134374	-1.84221
15	B3	2	51776.5	6340.93	10033.8	103962	-1196.19																15	B3	2	104175	9292.69	13486.2	122354	-40.9029
16	B4	2	574156	63612.3	11209.9	110459	-264.896																16	B4	2	47165.8	4191.17	13241.7	120836	233.685
17	B5	2	573221	60333.3	10611.7	96883.5	202.601																17	B5	2	82785.9	5518.85	13733	114410	613.574
18	B6	2	551035	56257.4	10930.1	95273.1	-165.442																18	B6	2	42655.4	3840.43	13421.7	114269	594.426
19	B7	2	122939	13574.3	13083.2	110021	-1399.25																19	B7	2	808514	83032.4	15794.1	120878	-883.643
20	B8	2	123849	12906.5	11114.3	98974.8	-370.126																20	B8	2	822329	85683.5	14955.3	120550	-140.062
21	B9	2	127908	13821.6	11559.7	106404	-81.1568																21	B9	2	834161	91604.5	14850.6	126964	-116.917
22	B10	2	45795.9	5997.96	8706.53	89064.3	-937.226																22	B10	2	690703	83656.1	13238.3	115083	509.176
23	B11	2	38970.6	5397.04	8922.7	101869	-1537.17																23	B11	2	658218	87934.6	11633.3	111174	-438.459
24	B12	2	36810.5	6042.49	7355.64	94477	-656.008																24	B12	2	683045	103879	11053.8	113803	-30.7661
25	C1	2	52597	7758.19	8784.3	103006	-1342.12																25	C1	2	62639.2	6376.17	12386.6	128421	-287.011
26	C2	2	54450.3	7443.23	9443.97	99575.8	503.924																26	C2	2	60478.7	6580.15	13684.7	123922	4005.6
27	C3	2	50188.6	6468.56	8789.12	94564.7	-1677.85																27	C3	2	52429.4	5844.48	12839.2	111386	-615.904
28	C4	2	40781.7	4651.79	10903.6	100338	-362.195																28	C4	2	37799.1	2714.33	1734.7	2494.69	2048.04
29	C5	2	54285.3	5396.17	10496.9	94109.2	234.516																29	C5	2	29525.6	1989.33	1601.77	2340.14	1137.27
30	C6	2	-12237.4	4012.1	10289.2	93158.1	-951.345																30	C6	2	-24233.4	2629.82	1202.79	2168.95	1229.01
31	C7	2	48564.9	5248.81	11058.9	91682	-1216.27																31	C7	2	29598.3	2026.48	2150.45	2051.35	876.296
32	C8	2	44799.7	5286.01	11397.2	97247	-1148.73																32	C8	2	34211.2	2512.11	2118.2	2296.01	934.216
33	C9	2	11379.9	1782.77	9461.39	88364.9	-1160.19																33	C9	2	25571.8	2375.89	1387.98	2174.37	-226.084
34	C10	2	13753.1	1815.98	9239.2	91377.7	-1117.45																34	C10	2	35573.1	2629.87	1655.91	2216.59	2029.64
35	C11	2	12731.1	2050.53	8335.05	91748.8	-1550.54																35	C11	2	51151.7	4667.4	2654.47	3854.01	3141.02
36	C12	2	11554.5	2490.97	7136.43	92124.6	-275.869																36	C12	2	38008.7	3470.42	1783.74	2815.93	3192.92
37	D1	2	400584	55369.3	6399.39	75526.9	405.777																37	D1	2	122908	14392.2	11595.9	128072	1784.55
38	D2	2	468483	57567.7	11680.1	119921	407.014																38	D2	2	156563	17697.4	12449.7	117585	1622.44
39	D3	2	523129	58053.7	10371.4	94643.2	88.7433																39	D3	2	131901	14033.7	11840.8	103614	623.966
40	D4	2	13473.1	1208.39	9862.08	89056.1	-361.882																40	D4	2	43613.6	3664.59	13383.7	109707	512.733
41	D5	2	15145.9	1410.05	10213.3	88431.5	2857.45																41	D5	2	61063.2	12725	13832.6	104491	522.426
42	D6	2	15467.4	1845.02	10271.7	88522	-548.184																42	D6	2	45661.3	6804.97	13663.9	104034	143.975
43	D7	2	12102.9	1308.1	10066	86155.9	-1189.76																43	D7	2	37889.3	3612.66	13475.8	104857	-792.102
44	D8	2	15477.5	1523.38	10516.5	88433.7	-678.516																44	D8	2	49553.7	5498.21	13996.4	104598	2026.67
45	D9	2	12422.3	1567.29	10522.5	93749.1	-995.231																45	D9	2	38967.4	4023.93	12984	105484	-32.3798
46	D10	2	23298.6	4070.53	8990.03	89014.6	196.128																46	D10	2	42263.1	4090.5	12899.8	108161	1028.04
47	D11	2	28816.2	6594.1	9690.15	102045	-1502.45																47	D11	2	46187.4	4458.89	12004.7	115302	-637.708
48	D12	2	12848.6	1874.64	8119.41	95720.5	-1728.11																48	D12	2	41575.9	4043.79	10065.7	108080	-946.543
49	E1	2	402708	55861.9	9595.64	117539	581.034																49	E1	2	827034	114905	13593	141808	899.504
50	E2	2	396631	48437.1	9773.57	108757	-164.903																50	E2	2	801029	97835.6	14517.2	126874	2240.64
51	E3	2	521008	57313.9	10200.1	103118	974.178																51	E3	2	731782	80454.2	13962.6	116493	1944.21
52	E4	2	85092.2	8784.9	10138.9	90179.9	-340.713																52	E4	2	61084.9	6818.55	12807.6	104125	524.8
53	E5	2	71546.5	7316.34	10233.7	85164.8	-46.7951																53	E5	2	44390.7	6010.84	12577.9	96387.2	749.099
54	E6	2	76942.9	7666.9	10107.1	84276.2	-400.278																54	E6	2	42421	4879.95	13162.5	99794.2	306.068
55	E7	2	18044.6	1706.45	9762.03	87525.2	805.227																55	E7	2	621276	61045.1	14220.8	104372	1432.19
56	E8	2	91806.3	15168	10250.1	85487	-534.744																56	E8	2	589346	58664.4	13530.9	99443.5	377.542
57	E9	2	15028.9	1641.14	9961.44	92332.5	-540.25																57	E9	2	632324	65072.3	13661.2	109912	195.084
58	E10	2	17027.4	2567.63	9263.67	92827.6	-286.204																58	E10	2	50092.3	6142.27	12199.9	105702	196.157
59	E11	2	16805.7	2230.39	9672.79	102411	-89.3427																59	E11	2	63653.1	7737.38	13392.3	114851	836.37
60	E12	2	14901.1	2643.44	7896.4	98178.2	-860.96																60	E12	2	60811.5	8183.98	10530.4	114522	16.5374
61	F1	2	20903.1	3395.87	9983.42	128363	-1303.81																61	F1	2	90689.3	11511.9	15344.8	156731	568.032
62	F2	2	22282.4	3945.03	9847.98	112267	-1368.93																62	F2	2	72802.7	8849.53	13333.6	130974	-436.317
63	F3	2	20494	3973.23	10681.9	100874	-1443.9																63	F3	2	74730.8	8092.97	14172.9	121039	-517.582
64	F4	2	17764.8	2280.45	11485.8	107500	650.94																64	F4	2	64727.3	9360.02	14289.5	113965	1211.02
65	F5	2	27544.3	3640.36	9937.44	92916.5	-64.6772																65	F5	2	53032.7	5737.32	13317.9	105090	772.785
66	F6	2	24096	2667.63	11212.4	95815.8	-604.481																66	F6	2	56965.1	5567.25	14399.9	111052	99.834
67	F7	2	24101.9	3317.92	10855	89218.1	-552.151																67	F7	2	680935	67170.3	14571	106009	3179.06
68	F8	2	28396.6	3974.51	11851.6	98257.4	-732.964																68	F8	2	804266	80514.5	16004.3	118394	124.242
69	F9	2	30767.6	3776.4	10921.2	100326	758.29																69	F9	2	781342	83176	15893.2	119607	3042.4
70	F10	2	523205	58725	9936.8	99115.4	-1481.66																70	F10	2	746818	83991.4	13677.4	111078	-365.817
71	F11	2	575146	71221.3	10148.2	103165	240.18																71	F11	2	767245	94921.5	13805.5	119788	972.681
72	F12	2	569335	80330.9	9371.26	106227	-2208.1																72	F12	2	775525	109515	13080.6	125319	-1043.6
73	G1	2	37337.1	5260.49	10748.8	132159	-2158.8																73	G1	2	234711	31873.1	15537	164298	-625.727
74	G2	2	32565.2	3627.49	9633.86	118159	-1246.26																74	G2	2	193823	24274.1	15950.9	157204	604.199
75	G3	2	29007.5	4319.24	10841.9	112373	-1287.21																75	G3	2	187875	25652.3	15621.1	133794	-613.697
76	G4	2	32071.7	4245.73	11302.4	109472	-1925.74																76	G4	2	107945	21766.7	16343.5	135305	-1331.5
77	G5	2	26079.8	3174.97	10595.5	92829	-630.818																77	G5	2	53816.8	5515.71	13468.7	110438	625.704
78	G6	2	26867.3	3987.93	11440.4	98651.4	-923.918																78	G6	2	73427.9	12228.3	15369.3	112195	1532.68
79	G7	2	28177.5	3532.51	10564.8	92422.6	80.2667																79	G7	2	59133.5	6295.56	13307.8	105310	906.259
80	G8	2	28745.2	3271.49	11215.6	100373	-2130.67																80	G8	2	62764.3	7104.45	14510.6	115786	-418.986
81	G9	2	29827.3	3641.78	10756.3	100513	358.421																81	G9	2	64821.2	7759.79	15307.6	122347	1788.91
82	G10	2	583616	69793.7	10446.4	97466.1	-483.189																82	G10	2	73562.4	8292.78	24736.1	233226	555.949
83	G11	2	562786	73716.6	9442.16	97522.4	-885.895																83	G11	2	64948.2	7563.79	12933.6	120334	519.654
84	G12	2	706186	103875	11567.9	121242	-2438.22																84	G12	2	79378.6	16041.7	15559.8	152538	-1658.4
85	H1	2	123487	20789.7	9290.86	128138	-815.273																85	H1	2	81110.9	11518.3	12383.6	152122	1045.09
86	H2	2	118386	17856.1	9259.36	120663	-1331.59																86	H2	2	79742.9	10594.7	14219.1	161111	-157.201
87	H3	2	104234	13522.1	9329.89	113725	-1738.84																87	H3	2	73414.8	12650.6	13852.6	131531	-239.66
88	H4	2	29136.3	4750.51	9609.53	110414	-133.51																88	H4	2	37876.4	3381.24	1608.08	2714.74	1940.7
89	H5	2	36679.4	5183.79	11163.3	109353	-806.338																89	H5	2	44753.6	4806.03	2555.09	3756.74	1622.93
90	H6	2	34649.7	4450.43	12110	115200	-1207.24																90	H6	2	139390	10852	6097.34	5077.88	3491.95
91	H7	2	29254.1	4348.73	11577.7	110091	-1869.48																91	H7	2	30317.5	2985.55	1829.51	2477.59	1138.9
92	H8	2	31393.7	4281.14	12200.9	116233	-688.01																92	H8	2	38943.1	3090.16	1902.94	2359.34	3140.01
93	H9	2	28548.9	4045.86	9706.89	104454	-1108.63																93	H9	2	44074.6	3821.95	2401.02	2464.03	2125.54
94	H10	2	27499.8	4152.46	9063.12	105140	750.739																94	H10	2	59896.3	7016.6	14632.7	127354	1150.82
95	H11	2	30163.6	4622.9	8949.99	114804	-1423.4																95	H11	2	66085.4	8408.14	12281.9	139746	-694.489
96	H12	2	30498.3	5387.94	8633.03	117725	-1484.48																96	H12	2	88602.9	16883.6	13432.9	141378	-337.582
1	A1	3	55681.4	8939.71	8587.42	116744	-1334.17																1	A1	3	811246	131414	13344.7	143536	101.055
2	A2	3	62157	8961.21	9181.21	115494	-624.384																2	A2	3	834237	119449	13338.5	142058	266.876
3	A3	3	63266.6	8226.76	10194.9	112343	-1882.13																3	A3	3	800114	103480	14598.8	135233	-424.15
4	A4	3	620905	74353.5	11239.4	114889	131.923																4	A4	3	51355.9	4817.39	13748.8	131046	947.048
5	A5	3	608438	69386.9	11803.4	109839	-601.962																5	A5	3	55958.1	5190.97	15128.2	130246	301.226
6	A6	3	606640	66868.3	11776.2	107715	-1403.04																6	A6	3	59460.4	4505.73	14591.3	129322	-271.627
7	A7	3	50219.7	6638.05	11217	105984	-1354.06																7	A7	3	756500	83851.1	16283.6	131758	-825.068
8	A8	3	52242.7	6824.5	12137.6	113485	-1102.13																8	A8	3	811830	91502.7	16628.7	135503	-692.976
9	A9	3	44478.6	6537.99	10941.6	110995	-2860.3																9	A9	3	769922	91376.8	14995.4	131260	-1836.83
10	A10	3	49706.4	7207.91	9712.04	108779	-1996.26																10	A10	3	44284.7	4880.73	12989.9	132062	-1453.89
11	A11	3	53869.5	8431.23	8722.5	107917	-2158.9																11	A11	3	50131.9	5636.29	12662.5	140839	-733.826
12	A12	3	52221.9	9053.85	7992.51	115738	-1694.5																12	A12	3	56203.2	6569.51	11829.5	140486	-1394.67
13	B1	3	60201.2	9475.59	9314.41	123520	-1747.24																13	B1	3	71116.3	7158.34	12509.3	145748	-873.922
14	B2	3	51337.3	7275.33	9032.29	99668.9	-1315.81																14	B2	3	130079	40423.7	16315.9	134180	50.8608
15	B3	3	51233.6	6129.03	9813.29	104044	-1278.94																15	B3	3	106808	9429.45	13707.6	122972	195.066
16	B4	3	570381	63434.3	11774	110759	-116.382																16	B4	3	47728	4711.63	13848.5	120856	302.107
17	B5	3	560728	58905.8	10971.5	96208.2	431.57																17	B5	3	83807	5675.29	14290.3	113992	578.76
18	B6	3	542845	55700.7	10803.9	94919.6	-210.985																18	B6	3	42831.4	4140.52	13705.2	114404	492.716
19	B7	3	118575	13024.6	13086.3	109314	-1267.28																19	B7	3	808459	82794.1	16132	121034	-732.579
20	B8	3	121892	12410.6	11132.3	98784.8	-212.637																20	B8	3	818305	85451	15402.9	120577	290.26
21	B9	3	124875	14005.3	11136.9	105887	-276.995																21	B9	3	832406	91566.5	15239.1	127596	-45.7982
22	B10	3	45838.8	6128.21	8842.39	88371.8	-910.856																22	B10	3	681144	82844.7	13571.3	115074	598.424
23	B11	3	39010.7	5275.91	8946.56	101936	-1321.45																23	B11	3	646740	86464.9	11866.5	111055	-302.214
24	B12	3	36287.3	6033.13	7496.09	94670.3	-860.642																24	B12	3	674804	103231	11059.3	114093	-120.604
25	C1	3	53483.1	7953.47	8354.13	103337	-1172.39																25	C1	3	62933.7	6003.51	12223.1	128349	-97.99
26	C2	3	54120.3	7539.73	9064.67	98731.8	507.43																26	C2	3	60858.3	6147.52	13134.9	124442	3628.5
27	C3	3	50784.4	6566.34	8836.29	93782.4	-1736.51																27	C3	3	52382.7	5754.02	12446.5	111011	-722.175
28	C4	3	40573	4668.99	10849.4	99500.8	-379.523																28	C4	3	37289	2851.28	1641.33	2478.46	2374.09
29	C5	3	54142.2	5664.4	10237.8	93791.9	105.895																29	C5	3	29754.9	1997.95	1049.53	2186.19	1525.11
30	C6	3	-12393.5	4251.16	10159	93170.6	-885.685																30	C6	3	-24614.1	2409.06	1411.16	1770.7	1405.42
31	C7	3	48795.7	5455.99	10806.6	91460	-1162.32																31	C7	3	29326.9	2355.31	1712.47	2008.29	404.692
32	C8	3	44963.8	5552.19	11422	96530.6	-1133.03																32	C8	3	33609.7	2467.95	1764.44	2347.72	1206.41
33	C9	3	11188.7	1629.72	9299.62	88543.7	-1049.64																33	C9	3	26090.9	2435.59	745.833	1821.23	-227.149
34	C10	3	13406	1599.88	9073.66	91754.1	-1664.42																34	C10	3	34296.4	2359.22	1558.45	2238.04	1764.46
35	C11	3	12714	1988.76	8358.13	92154.9	-1392.05																35	C11	3	51560.2	4390.99	2318	3778.86	2943.37
36	C12	3	11562.9	2819.73	7081.06	91553.2	-813.437																36	C12	3	38402.2	3460.49	1250.91	2966.65	3302.41
37	D1	3	398205	55303	6034.73	75988.4	451.362																37	D1	3	123844	14580.4	11782.1	128050	1329.32
38	D2	3	464258	57623.1	11558.5	119507	884.351																38	D2	3	157028	17956.7	12742.2	117860	1690.63
39	D3	3	514910	57373.2	10103.5	94444.5	195.259																39	D3	3	131997	13804.3	11856.6	104057	544.821
40	D4	3	13236.9	1133.55	9937.49	89065.9	-192.393																40	D4	3	44243.4	3629.95	13337.7	109266	533.152
41	D5	3	14854.2	1578.14	10134.1	88183.4	3049.83																41	D5	3	61602.6	12995.9	14229.6	104200	769.952
42	D6	3	15544.2	1580.72	10364.9	88480.2	-192.077																42	D6	3	43743.4	5727.36	14045	103576	176.412
43	D7	3	13182.5	1374.16	9862.2	86164.5	-1338.64																43	D7	3	37632.1	3557.42	13493.3	104324	-598.115
44	D8	3	15704.3	1583.1	10400	88734.5	-504.36																44	D8	3	50783.4	5425.76	14070.3	104290	2049.71
45	D9	3	12409.3	1528.68	10869.5	93899.4	-917.47																45	D9	3	39446	4027.57	13269.1	105919	-306.928
46	D10	3	22670.5	4458.41	8979.83	88300.5	207.67																46	D10	3	43497	4155.08	13143.3	107943	856.144
47	D11	3	29817.8	7009.2	9694.88	102248	-1622.54																47	D11	3	46541.6	4588.7	11943.8	115146	-660.519
48	D12	3	12641.2	2145.58	8070.65	95958.1	-1592.22																48	D12	3	41459.9	4268.24	10141.8	107707	-675.254
49	E1	3	401578	55691.7	9832.09	116900	624.084																49	E1	3	819849	114450	14287.8	141731	912.782
50	E2	3	395648	48512.2	9841.08	108672	-387.321																50	E2	3	793671	97373.6	14779.4	127062	2411.3
51	E3	3	514732	56498.4	10357.8	102043	769.748																51	E3	3	727541	80138	14191.1	117291	2192.39
52	E4	3	84519.6	8839.07	9984.01	90501.4	67.5189																52	E4	3	62923.2	6938.73	13288.5	104373	401.542
53	E5	3	69416.2	7275.29	10033.9	85255.9	71.8268																53	E5	3	45459.7	6833.74	12484.3	95730.5	506.646
54	E6	3	74115.7	7332.28	10128.5	83790.9	-302.035																54	E6	3	42705.5	5041.56	13192.9	99505.3	749.331
55	E7	3	17453.3	1619.36	10107	87725.2	636.898																55	E7	3	621732	61134.5	14463.5	104593	1611.48
56	E8	3	93561.8	15745.1	10582.9	85463.5	-737.096																56	E8	3	590290	58628.8	13573.2	99791.5	417.185
57	E9	3	14059.4	1649.06	10409.7	92121.1	-353.195																57	E9	3	629427	64955.1	14237.8	110115	530.268
58	E10	3	16606.4	2528.66	9578.54	92838	-193.263																58	E10	3	50719.5	6292.88	12176.8	105746	313.863
59	E11	3	17009.7	2261.81	9881.18	102420	-70.0456																59	E11	3	63903	7477.36	13338.6	114998	910.17
60	E12	3	15401.8	2268.89	7862.69	97742.8	-883.334																60	E12	3	63328.9	8587.28	10800	114289	215.053
61	F1	3	22328.5	3807.02	10218.8	127869	-1127.7																61	F1	3	91944.8	11577.8	15678.6	157701	-62.9662
62	F2	3	22083.3	4003.43	10178	112535	-1737.1																62	F2	3	71763.6	8589.77	13260.2	131916	-490.886
63	F3	3	20844.3	4100.06	10296.1	101349	-1457.46																63	F3	3	73900.2	8176.12	13960.7	120853	-608.587
64	F4	3	18237.8	2337.54	11841.8	107718	442.192																64	F4	3	78355.9	17748.9	15593.5	115134	1525.2
65	F5	3	27219.1	3234.42	10316.5	92165.5	14.0404																65	F5	3	53126.3	5554.71	13117.4	105698	820.382
66	F6	3	24852.4	2672.25	11023.1	95614.1	-174.031																66	F6	3	57006.3	5579.68	14040.9	110799	154.615
67	F7	3	24556.2	3151.75	10473	89839.1	-685.476																67	F7	3	674674	66621.1	14602.4	106127	3214.92
68	F8	3	29137.3	3750.63	11839	99031.9	-760.855																68	F8	3	797166	80104.2	15760	118865	107.064
69	F9	3	30320.8	3365.95	10954.4	100467	768.97																69	F9	3	776721	82058.5	15575.1	120329	3190.99
70	F10	3	512809	57778.2	10359.7	99587	-1172.33																70	F10	3	736619	82861.4	13713.3	111292	-566.71
71	F11	3	567740	70435.9	10207.2	103263	221.023																71	F11	3	753577	93307.8	13375.3	120095	1079.42
72	F12	3	568043	80683.4	9706.6	107026	-2222.35																72	F12	3	758482	106397	13272.5	125160	-892.561
73	G1	3	37209.4	4622.03	10494.6	132520	-1514.85																73	G1	3	232724	31898.8	15691.4	163591	-537.755
74	G2	3	31900.8	3879.87	9882.39	117915	-894.146																74	G2	3	192371	25205.8	16586.9	156898	-390.397
75	G3	3	28884.6	4187.68	11285.7	113182	-1363.12																75	G3	3	183922	23274.8	15334.6	134384	-202.355
76	G4	3	32672.1	4476.54	10979.5	109180	-1811.4																76	G4	3	108919	21976.8	16576.4	135713	-1014.5
77	G5	3	25843.7	3497.52	10167	92184.3	-465.431																77	G5	3	53789.3	5921.42	13606.2	109724	674.815
78	G6	3	27485.4	4079.34	11053.1	99021	-740.197																78	G6	3	73482.5	12265.5	15496.4	112126	1588.44
79	G7	3	28285.6	3676.52	10438.5	93114.3	217.551																79	G7	3	58757.3	6852.3	13961	105660	1016.63
80	G8	3	29067.4	3396.54	11159	100428	-1583.72																80	G8	3	63388.5	7051.16	14577.4	115475	76.7107
81	G9	3	29244.3	3903.91	10536.9	100753	304.762																81	G9	3	66580	8490.72	15441.3	122915	1417.57
82	G10	3	573565	68391.1	10405.4	97776.3	-54.5437																82	G10	3	73428.1	8341.92	24854.5	230526	716.778
83	G11	3	558621	72973.3	9348.69	97476.3	-1229.98																83	G11	3	63925.8	7944.23	12710.1	120419	309.337
84	G12	3	707333	103991	11233.9	121535	-2342.88																84	G12	3	79422.2	16192.2	15221.5	149978	-1823.23
85	H1	3	125501	20427.7	9808.13	128605	-469.793																85	H1	3	79614.3	11350.9	12511.2	152177	645.57
86	H2	3	119408	18087.2	9514.58	120321	-1550.1																86	H2	3	78855.7	10307.5	14248.3	160889	-370.361
87	H3	3	104412	14164	9894.64	113570	-1455.07																87	H3	3	72017.3	12487.9	13541.6	131735	-442.994
88	H4	3	30158.9	4603.09	9683.94	110309	186.514																88	H4	3	37244.7	3525.8	822.526	2865.4	1994.15
89	H5	3	37805.9	5507.81	11128.2	108698	-1250.33																89	H5	3	45267.2	5044.97	2219.43	3763.67	1595.04
90	H6	3	35724.8	5085.67	11884.5	115701	-1425.06																90	H6	3	138645	11264.4	5765.78	5130.37	3263.9
91	H7	3	29415.3	4534.14	11743.5	109860	-2130.86																91	H7	3	31263.6	3022.31	1851.72	2436.86	1698.83
92	H8	3	31041.4	4270.7	12065.7	116458	-751.384																92	H8	3	39219.7	2981.06	2037.46	2857.65	2857.61
93	H9	3	28595.8	4140.12	9791.62	104387	-785.899																93	H9	3	44238.7	3811.76	1841.32	2537.18	1829.92
94	H10	3	28064	4206.84	9203.42	105123	1371.7																94	H10	3	60219.5	7241.56	14584.4	127407	1708.33
95	H11	3	29554.7	5282.76	8620.79	114755	-1336.43																95	H11	3	64920.3	8309.71	11969.2	137694	-648.305
96	H12	3	30860.8	5135.64	9029.8	118552	-1148.26																96	H12	3	88260.1	17013.5	13053.5	141829	-42.6421
1	A1	4	57315.5	8988.58	8871.95	116112	-1537.9																1	A1	4	804926	130212	13081	143660	27.2331
2	A2	4	63050.3	8493.25	8882.76	114069	-315.892																2	A2	4	827841	117614	13380.4	143117	975.438
3	A3	4	63549	8260.86	10003.2	112342	-1293.11																3	A3	4	794198	102385	14763.7	135880	-363.519
4	A4	4	617303	73424.6	11403	114899	434.19																4	A4	4	52082.8	4789.7	14060.2	131654	926.45
5	A5	4	606831	68704.5	12084.2	109644	-402.483																5	A5	4	57602.2	5253.84	15606.9	130678	368.746
6	A6	4	604008	65966.7	11649.4	107819	-1111.89																6	A6	4	60839.2	4814.07	14938.3	129779	-539.753
7	A7	4	50153.3	7064.57	11348.9	105815	-1042.08																7	A7	4	752359	83375.4	16062.8	131936	-607.992
8	A8	4	52573.8	6583.99	12461.6	112904	-1531.76																8	A8	4	809985	90990.6	16429.8	135696	-668.794
9	A9	4	45524.6	5881.24	10686.7	110741	-3043.4																9	A9	4	769072	90904.8	15271.9	131922	-1812.73
10	A10	4	50496	6922.97	10415.3	108273	-1441.44																10	A10	4	44929.5	4548.02	13152.5	133284	-892.515
11	A11	4	54818.2	8273.73	8757.54	108283	-1721.75																11	A11	4	50991.4	5746.34	12300.4	140959	-857.03
12	A12	4	54464.7	8701.09	8522.25	115808	-1983.88																12	A12	4	57387.9	6640.92	12148.8	140658	-769.731
13	B1	4	59072.3	8558.55	9105.42	123580	-2104.85																13	B1	4	71939.7	6833.15	12501.6	145790	-1428.24
14	B2	4	51343.1	7403.28	8455.77	99341.2	-1636.57																14	B2	4	132347	41469.9	15934.8	134503	27.9629
15	B3	4	51033.3	6356.95	9771.16	103832	-1333.63																15	B3	4	107664	9531.07	13852	122779	-122.822
16	B4	4	568194	63529.2	11550.9	111020	-264.754																16	B4	4	48400.2	4394.86	13220.3	121594	385.835
17	B5	4	558141	58613.2	10545.2	96041.4	345.283																17	B5	4	83282.9	5563.27	14063.9	114436	782.18
18	B6	4	540444	55582.6	10715.7	94581.1	-289.205																18	B6	4	43351.1	4043.34	13728.8	114122	544.481
19	B7	4	118548	12783.1	12874.5	109161	-1621.92																19	B7	4	804431	82601.3	16237.3	121523	-708.69
20	B8	4	122032	12549.2	10971.3	98556	-586.708																20	B8	4	816190	85126.4	14997.3	120415	113.657
21	B9	4	123592	13811.5	10726.5	105515	-319.706																21	B9	4	832773	91245.1	15352.7	127633	149.391
22	B10	4	46418.4	6253.96	8497.06	88362.4	-877.628																22	B10	4	675560	82118.5	13255.6	115005	578.132
23	B11	4	39359	5286.15	9029.51	101758	-1523.73																23	B11	4	640760	85499.7	11861.8	111116	-344.163
24	B12	4	36701.8	6338.04	7535.3	94008.5	-775.318																24	B12	4	669781	102566	10794.4	113576	104.149
25	C1	4	54061.6	7572.52	8479.21	103258	-1543.45																25	C1	4	61866.2	6087.17	12110	128533	-607.773
26	C2	4	53937.1	7585.54	9311.4	98797.6	713.125																26	C2	4	60807.4	6445.56	13320.2	124854	3790.78
27	C3	4	51176.8	6499.31	8909.67	93956.1	-1600.52																27	C3	4	52656.8	5775.11	12747.3	111610	-467.094
28	C4	4	41095.5	4676.96	10790.7	99511.6	-449.265																28	C4	4	36780.8	2941.8	2110.63	2297.33	1876.42
29	C5	4	53559.4	5713.01	10201.5	93755.5	339.803																29	C5	4	29740.3	1877.34	1503.66	2146.38	1252.32
30	C6	4	-12417.3	3890.64	9969.71	93111.1	-767.214																30	C6	4	-25372	2557.11	1194.28	1806.83	1155.33
31	C7	4	48824.8	5206.46	11052.8	91248.2	-1292.42																31	C7	4	29501.3	2402.14	1796.47	2018.37	376.246
32	C8	4	43682.4	5088.52	11021.2	96383.2	-883.704																32	C8	4	33290.4	2514.77	2089.32	2339.09	1016.04
33	C9	4	11750	1725.39	9364.29	88541.8	-1446.58																33	C9	4	25797.8	2044.58	1042.43	1913.52	-350.535
34	C10	4	13782.2	1699.9	9104.58	91369.6	-1210.59																34	C10	4	34594	2691.29	1515.9	2098.8	1384.89
35	C11	4	13520.3	2037.85	8070.72	92365.9	-1480.63																35	C11	4	50533.3	4646.28	2679.81	3767.86	2883.65
36	C12	4	11892.9	2110.72	6959.04	91650.3	-264.312																36	C12	4	38060.3	3568.19	1328.18	3537.52	3290.16
37	D1	4	397359	55349.8	6548.12	75875	746.831																37	D1	4	123772	14525.8	11355.9	127811	1418.61
38	D2	4	461626	57003.1	11862.9	119471	429.305																38	D2	4	156707	17664.7	12645.5	117875	1833.97
39	D3	4	510547	56974.8	9994.06	93681.4	40.686																39	D3	4	132181	13780.1	11956.3	104142	481.653
40	D4	4	13109.3	1564.17	9805.45	88924.1	-146.128																40	D4	4	44708.3	3412.06	13482.5	109689	229.564
41	D5	4	14662.6	1390.64	9893.58	88574.7	2964.58																41	D5	4	61929.1	13261	14161.1	104363	623.093
42	D6	4	15829.2	1804.4	10488.3	88718.9	-445.029																42	D6	4	43580.4	5447.91	13735	103454	389.32
43	D7	4	12455.9	1376.2	10328.2	85886.2	-1126																43	D7	4	38413.5	3374.41	13518.4	104870	-1170.2
44	D8	4	15990.5	1812.04	10662	88488.4	-842.29																44	D8	4	51118.5	5520.15	13942	104377	2267.19
45	D9	4	12854.7	1606.5	10951.8	93789.7	-798.711																45	D9	4	40506	4037.93	13270.7	106188	-326.841
46	D10	4	23304.4	4398.93	8815.33	88067.4	227.715																46	D10	4	44750.3	4200.67	13427.4	108782	842.507
47	D11	4	30377.2	7373.13	9796.25	102149	-1533.44																47	D11	4	46748.6	4507.24	11930.5	115359	-961.305
48	D12	4	13435.6	1818.15	8077.9	95647.3	-1609.8																48	D12	4	41453.3	4153.86	9963.42	107522	-1017.94
49	E1	4	400340	55394.2	9676.78	117036	58.2661																49	E1	4	814040	112784	14224.1	141746	941.981
50	E2	4	394582	48268.4	9561.51	108469	-297.081																50	E2	4	787057	96430.6	14426.5	126544	2151.99
51	E3	4	512470	56326.8	10173.7	102470	616.163																51	E3	4	721680	79908.8	13963	117077	1681.48
52	E4	4	84549.9	8777.24	9799.31	90753.6	-134.754																52	E4	4	60660.3	6483.54	13538.9	104462	612.93
53	E5	4	69513.6	7491.74	10083.7	84718.8	10.5568																53	E5	4	46878.7	7096.96	12794.1	96101.6	559.989
54	E6	4	74923.6	7446.3	10213.9	83722.5	26.2572																54	E6	4	43109.8	4871.98	13302.7	99392.1	233.137
55	E7	4	17821.9	1919.41	9905.73	87322.1	691.075																55	E7	4	619443	61096.3	14541.5	104972	1086.69
56	E8	4	96780	16315.9	10583.7	85202.9	-584.931																56	E8	4	587310	58640.9	13600.2	99928.3	207.759
57	E9	4	14343.2	1516.07	10180.8	92323.7	-644.487																57	E9	4	628938	64559.1	14046.8	110323	348.883
58	E10	4	17238.8	2374.43	9396.58	92668.3	-84.5418																58	E10	4	50453.5	6094.74	11957.8	105644	171.735
59	E11	4	16671.3	2234.51	9905.94	102152	-538.535																59	E11	4	64354.3	8050.38	13312.5	115628	726.532
60	E12	4	15015.4	2598.8	7551.53	98137.3	-826.241																60	E12	4	65594.3	9341.84	10520.7	116881	-462.488
61	F1	4	23235.7	3141.2	10924	127543	-1026.73																61	F1	4	91333	11829.8	15916.2	157436	558.744
62	F2	4	22584.2	3677.92	10266.9	111939	-1200.96																62	F2	4	73450.4	8711.58	13434.2	132077	-120.153
63	F3	4	20750.9	3605.75	10573.3	101157	-1494.58																63	F3	4	75257.2	8386.79	14501.3	120812	-388.799
64	F4	4	18458.1	1995.81	11978.8	107343	427.671																64	F4	4	78973.1	18362.3	16234.3	114744	1299.53
65	F5	4	27621	3219.74	10011.5	92037.1	-248.669																65	F5	4	54612.6	5588.83	13181.6	105816	739.88
66	F6	4	24894.8	2687.17	11249.4	94971	-585.172																66	F6	4	57124.6	5634.2	14337.7	110964	183.413
67	F7	4	25033.6	3007.13	10871.3	89560.4	-914.066																67	F7	4	674158	66659.6	14907.5	106487	2994.63
68	F8	4	29016.5	3708.24	12103.1	98729.8	-912.789																68	F8	4	796207	79687.3	15761.5	118846	254.438
69	F9	4	31356.7	3409.81	11248.4	100260	401.668																69	F9	4	773466	81759.1	15639	120348	2913.28
70	F10	4	509819	57461.3	10441.8	99483	-1055.76																70	F10	4	731579	82217.1	13723.9	110836	-219.556
71	F11	4	565973	70453.4	10699.8	103143	517.471																71	F11	4	747563	92595.1	13659.7	120041	1391.29
72	F12	4	567717	80143	9491.51	106815	-2220.39																72	F12	4	750510	106169	13119.6	124796	-800.412
73	G1	4	37467.8	4584.68	10711.4	132370	-1425.35																73	G1	4	232931	32585.5	15273.2	163758	-343.748
74	G2	4	30901.9	3799.8	10266.5	117766	-1371.91																74	G2	4	193959	25994.6	16407.1	157139	95.8007
75	G3	4	28739.8	3985.24	10902.7	112669	-1470.17																75	G3	4	184400	22980.6	15482.3	134254	-494.873
76	G4	4	31409.5	4109.34	10836.5	108603	-2106.91																76	G4	4	109959	22977.3	16459.1	135714	-1145.87
77	G5	4	25661.1	3368.17	10210.8	92069.7	-296.653																77	G5	4	54799.2	5652.2	13902.5	110060	453.651
78	G6	4	27091.1	4267.42	11493.8	98804.3	-920.92																78	G6	4	74043.1	12553.8	15551	112286	1791.05
79	G7	4	27474.4	3390.65	10550.1	92571.7	-229.832																79	G7	4	59316.2	6901.19	13447.1	105637	790.497
80	G8	4	28974.7	3552.28	11115.6	100531	-1704.3																80	G8	4	64915.2	7332.88	14852.3	116101	-15.564
81	G9	4	28995	3541.72	10920.6	100941	3.69127																81	G9	4	67616	8497.78	15388	122677	1378.16
82	G10	4	570861	68436.2	10233.8	97510.6	-425.255																82	G10	4	73609.7	8607.16	24366.8	230798	226.559
83	G11	4	554818	72699.2	9367.15	96846.6	-950.603																83	G11	4	65259.8	7426.06	13069.8	120750	636.149
84	G12	4	705836	103567	10986.7	121503	-2108.8																84	G12	4	78455.7	15801.5	15217.8	150353	-1477.34
85	H1	4	124213	21225.6	9519.97	128026	-1020.18																85	H1	4	79810.6	10627.1	12799.4	152084	242.996
86	H2	4	120124	18074.9	9258.3	120015	-1555.72																86	H2	4	77452.5	10369.1	13829.1	161132	-621.998
87	H3	4	104317	13674.1	9922.79	113429	-1462.66																87	H3	4	72737.3	12154.8	13492.5	132204	-643.268
88	H4	4	30013.5	4669.09	9970.16	109724	-46.9219																88	H4	4	36681.4	3053.14	907.273	2814.04	1613.13
89	H5	4	36915.9	5426.85	10901.3	108653	-1104.89																89	H5	4	45314.8	4367.82	2654.49	3647.52	1352.71
90	H6	4	34821.9	4969.78	11965.2	115467	-1215.56																90	H6	4	139184	10849.9	5697.99	5779.89	2793.02
91	H7	4	29927	4179.43	11603.8	109863	-1981.12																91	H7	4	30561.1	2655.41	1801.77	2713.89	1213.27
92	H8	4	31818.8	4456.21	12025	116442	-697.442																92	H8	4	38928.3	2910.98	2097.43	2650.22	2554.78
93	H9	4	29227.7	4333.79	10038	104594	-1106.73																93	H9	4	44611.2	3800.85	1956.17	2685.59	1831.57
94	H10	4	28100.7	3975.58	9469.49	104701	1440.95																94	H10	4	60491.4	7289.76	14591.9	127515	1514.96
95	H11	4	30934	5231.74	9262.67	114717	-1572.08																95	H11	4	65473.9	8389.46	12362.2	137741	-1288.58
96	H12	4	31684.9	5763.02	9251.7	117983	-1693.17																96	H12	4	89001.4	16975.2	12477.2	141306	-412.06
1	A1	5	57341.3	8301.55	8811.92	116390	-1106.31																1	A1	5	798755	129860	13433.8	143381	6.86201
2	A2	5	62539.2	8435.51	8798.13	114777	-347.154																2	A2	5	822591	117439	13529.3	143051	143.971
3	A3	5	63181.1	7512.02	10095.4	112850	-1427.54																3	A3	5	788619	102026	14437	135923	-88.6183
4	A4	5	614732	73786.2	11277.7	114949	32.1851																4	A4	5	52208	5198.45	13950	131790	1105.24
5	A5	5	605208	69066.9	11795	110119	-822.823																5	A5	5	57303.3	5241.37	15298.2	130809	182.943
6	A6	5	603472	66406.7	11507.8	108008	-1249.37																6	A6	5	62053.6	4708.4	15487.9	129844	-815.748
7	A7	5	49348.2	6372.5	10795.7	106492	-1073.57																7	A7	5	751369	83102.7	16000.9	132375	-946.865
8	A8	5	51287.5	6661.8	12006	113228	-1619.07																8	A8	5	809043	90881.4	16553.8	135445	-505.363
9	A9	5	44802.5	6105.02	10735.5	111260	-2915.82																9	A9	5	769338	90629.2	15239.5	132434	-1791.97
10	A10	5	49699	6990.08	9848.08	109170	-1608.5																10	A10	5	45015.3	4809.08	13199.7	132874	-1119.87
11	A11	5	53766.8	8007.25	8580.92	108278	-2058																11	A11	5	50164.8	6048.95	12703.5	140822	-881.834
12	A12	5	54646.3	8626.6	8356.97	115476	-1901.03																12	A12	5	56579.5	6584.48	12374.5	140391	-1180.32
13	B1	5	60774.5	8969.68	9705.93	123019	-2301.43																13	B1	5	71369.1	6533.77	13172.6	146249	-1152.21
14	B2	5	52253.3	7255.66	8942.91	99235	-1268.38																14	B2	5	134043	42253.2	16620.3	134172	-191.195
15	B3	5	51762.3	6240.59	10141.3	103605	-1161.16																15	B3	5	108631	9741.49	14394.8	122817	-201.833
16	B4	5	568382	63375.7	11807.8	110776	-405.442																16	B4	5	47997.8	4499.81	13656.6	121477	409.278
17	B5	5	558918	58914.9	10946.7	96332.1	22.659																17	B5	5	83682.8	5492.76	14060.5	113971	726.142
18	B6	5	540058	55133.9	10723.7	94071	-298.034																18	B6	5	42572.6	3752.13	13663.1	113873	429.572
19	B7	5	118654	13063.1	13353.1	109373	-1768.63																19	B7	5	804461	82229.1	16320.7	121616	-616.478
20	B8	5	122754	12258.4	11435.4	98482	-313.116																20	B8	5	814834	84873.4	15340.8	120706	189.473
21	B9	5	124704	13785.9	11415.8	105298	-355.558																21	B9	5	829957	91343.9	15730.4	127865	372.413
22	B10	5	46587.9	6085.67	8797.69	88645.3	-1033.37																22	B10	5	669700	81424.1	13674.7	115603	567.892
23	B11	5	38843.6	5108.71	8950.92	101606	-1578.47																23	B11	5	634689	84950.5	12060.5	110999	-485.984
24	B12	5	37719.9	6492.88	7434.72	94118	-1072.24																24	B12	5	663496	101554	10698.6	113364	-262.234
25	C1	5	53826.9	7971.06	8326.69	102667	-1333.92																25	C1	5	62240.3	6425.58	12312.7	128247	-655.33
26	C2	5	53952.6	7893.79	9350.67	98765.4	611.312																26	C2	5	59891.7	6275.83	12997.3	125003	3618.63
27	C3	5	51243.1	6479.27	8859.16	94052.9	-1773.11																27	C3	5	52677	5987.58	12807.6	111544	-677.948
28	C4	5	40836.8	4795.66	10746	99485.9	-315.619																28	C4	5	37054.2	2739.14	1815.19	2446.79	1793.11
29	C5	5	54118.8	5897.58	10246	93508.3	371.216																29	C5	5	29965.9	2194.84	1252.61	2232	1352.8
30	C6	5	-12489.7	3968.11	10108	92905.9	-872.181																30	C6	5	-24928.8	2436.58	1019.95	1711.84	1016.4
31	C7	5	48672.2	5251.22	10760.1	90993.3	-1177.61																31	C7	5	29191.3	2634.76	1772.52	1781.86	316.882
32	C8	5	44223.2	5412.63	11533.8	96735.3	-1331.35																32	C8	5	33643.7	2551.06	2003.9	2490.93	497.193
33	C9	5	11380.9	1610.15	9328.77	88888.4	-983.997																33	C9	5	25613.9	2424.15	1185.24	1881.84	-513.354
34	C10	5	13358.9	1719.39	9287.71	91587.1	-1190.75																34	C10	5	34439.4	2893.07	1562.16	1928.41	1387.13
35	C11	5	12901.7	2114.85	8154.83	92419.8	-1395.48																35	C11	5	50514	4781.75	2731.47	3930.16	2738.72
36	C12	5	11739.5	2509.32	7088.81	91909.9	-483.825																36	C12	5	38191.6	3819.16	1738	3189.63	2920.5
37	D1	5	397135	55590.3	6278.1	75888.5	727.417																37	D1	5	123703	14424.4	11902.7	128165	1336.9
38	D2	5	461612	57457.5	11696.4	119767	147.464																38	D2	5	157156	17963.3	12936.5	117975	1769.48
39	D3	5	508263	56925.8	10054.3	94086.6	96.5091																39	D3	5	132908	13858.3	12385.3	104291	597.81
40	D4	5	13125.8	1242.12	9489.91	88790.7	-140.799																40	D4	5	45030	3384.8	13536.2	109723	563.446
41	D5	5	15217.6	1697.57	9780.64	88362.1	2672.88																41	D5	5	62661.5	14307.7	14407.8	104169	750.25
42	D6	5	14921	1729.04	10339.1	88296	-252.822																42	D6	5	43974.2	5604.23	13721.4	103631	60.7275
43	D7	5	11873.1	1523.79	9902.62	85992.7	-1254.29																43	D7	5	37993	3306.98	13693.7	104641	-634.284
44	D8	5	15756.7	1917.18	10164.1	88395.2	-469.401																44	D8	5	51807.5	5706.3	14128.5	104372	1819.96
45	D9	5	12042.1	1865.87	10655.4	94007.1	-782.081																45	D9	5	40935.1	3735.48	13417.1	105901	-145.49
46	D10	5	22951.7	4206.19	8546.56	88004.6	128.99																46	D10	5	45361.4	4410.67	13479.3	109446	1124.53
47	D11	5	29425.8	7226.22	9487.47	102092	-1684.98																47	D11	5	46544.8	4671.29	11924.2	115542	-817.538
48	D12	5	12637.2	2078.11	7827.8	95542.2	-1761.15																48	D12	5	41745	4402	10242.9	107569	-399.18
49	E1	5	399870	55592.6	9479.29	116281	157.308																49	E1	5	807499	112468	14071.3	141392	846.523
50	E2	5	395258	48436.8	10050.7	108633	-293.529																50	E2	5	782301	95779.6	14943.2	126850	2224.65
51	E3	5	511387	55939.6	10933.2	102312	1037.32																51	E3	5	717329	78849.5	14445.3	117182	1743.93
52	E4	5	84945.2	8478.32	10329.4	90746.8	-287.299																52	E4	5	61216.4	6703.51	13444.9	104252	809.615
53	E5	5	69254.9	7367.05	9950.73	84988.4	203.516																53	E5	5	46957.4	7178.98	12915	96117.4	733.923
54	E6	5	73926.9	7547.28	10031	83740	-380.398																54	E6	5	43174.2	4842.94	13249.4	99255.2	499.359
55	E7	5	17749	1923.11	10094.2	87551.4	716.863																55	E7	5	619638	60851.8	14576.5	104340	1530.85
56	E8	5	99588.9	16763.4	10755.2	85337.2	-461.892																56	E8	5	586736	58564.5	13789.7	99868.7	609.368
57	E9	5	14549.7	1754.81	10316.4	92155.6	-297.065																57	E9	5	627925	64921.8	14460.1	110385	654.056
58	E10	5	16741.6	2564.2	9616.71	93010.2	-248.783																58	E10	5	51439.9	6064.58	12002.7	106047	216.349
59	E11	5	16166.6	2185.84	9971.4	102560	-369.849																59	E11	5	64721.4	7679.42	13255.8	115509	747.112
60	E12	5	14879.8	2136.96	7842.49	98375.6	-1322.47																60	E12	5	74092.9	10462.2	11125.5	116499	-194.598
61	F1	5	22077.4	2869.48	10453.9	127092	-998.752																61	F1	5	92321.7	12258.4	15513.3	158087	335.989
62	F2	5	21414.4	3599.19	10115.9	111944	-1317.55																62	F2	5	72497.5	9006.55	13446.5	132301	-716.781
63	F3	5	20543.5	3390.29	10818.4	100611	-1452.3																63	F3	5	77998.5	8791.02	14317.6	120775	-882.948
64	F4	5	17579.5	1795.8	11903.1	107669	379.868																64	F4	5	78847.3	19030	16212.5	115323	1584.99
65	F5	5	27593.4	3468.78	10407.6	91932.1	-266.551																65	F5	5	53741.7	5546.83	13374.1	105639	599.487
66	F6	5	24239.3	2521.02	10853.1	95225.4	-368.222																66	F6	5	57902.3	5688.09	14510	111138	110.163
67	F7	5	24418.5	3244.55	10794.1	89744.8	-838.967																67	F7	5	674405	66650.4	14738.5	106576	3306.91
68	F8	5	29232.2	3972.66	12474.4	98835.4	-465.187																68	F8	5	795614	79681.1	16116.6	118404	117.412
69	F9	5	30774.6	3693.83	11358.3	100363	891.823																69	F9	5	771310	81456.8	15976.1	120733	2867.51
70	F10	5	508883	57652.4	9833.29	99108.3	-985.578																70	F10	5	727080	81888.5	13945.7	111914	-503.346
71	F11	5	564711	70127.3	10243.4	102858	-81.6977																71	F11	5	742982	92055.1	13537.1	120383	1478.86
72	F12	5	565865	80200.5	9794.11	106558	-2159.31																72	F12	5	745931	105363	13086.8	124992	-1164.3
73	G1	5	37712.5	5448.96	10075.4	132683	-2577.94																73	G1	5	232413	31623.4	15514.2	163763	-873.179
74	G2	5	31960.1	4001.04	10003.7	118053	-1135.23																74	G2	5	192132	25761.8	16122.8	157688	175.691
75	G3	5	28713.5	4285.5	10878.6	113197	-1303.87																75	G3	5	184527	22537.6	15609.1	134637	-374.544
76	G4	5	31610.7	4280.76	10531	108704	-1666.88																76	G4	5	110167	22680.7	16644.1	135911	-1222.46
77	G5	5	25901.5	3378.48	10167	92382.6	-341.177																77	G5	5	53496.7	5832.55	13618.6	109810	644.038
78	G6	5	27617	4397.23	11572.7	99247.5	-1090.61																78	G6	5	73959.5	12635.1	15497.5	112213	2107.51
79	G7	5	27418.4	3612.45	10245.3	92497	-7.10941																79	G7	5	59582.9	6360	13872.8	105864	821.32
80	G8	5	29023.7	3502.73	11006.1	100526	-1810.41																80	G8	5	64479.4	6944.86	14774.8	116214	137.808
81	G9	5	28889.3	3446.4	11082	100988	305.113																81	G9	5	67272.4	8610.63	15535.9	123210	1858.37
82	G10	5	569187	68328.7	10864.3	97917.1	1.506																82	G10	5	73499.8	8022.04	24885.4	230696	527.816
83	G11	5	554934	72782.9	9465.05	97376.3	-943.093																83	G11	5	63104.4	7734.88	12956.3	120352	661.275
84	G12	5	706591	103969	11089.6	121889	-2663.65																84	G12	5	77894.9	15429.7	15094.9	150490	-1350.45
85	H1	5	124259	20599.6	9586.24	128506	-711.342																85	H1	5	79660.5	10824.1	12515.7	151157	688.228
86	H2	5	119142	17877.1	9065.14	119555	-1464.99																86	H2	5	79357.3	10020.4	13945.7	160936	-656.361
87	H3	5	103847	13932.4	9728.13	113198	-1608.07																87	H3	5	71924	12444.6	13724.7	132287	-782.802
88	H4	5	30403.8	4802.4	9549.27	109983	-385.372																88	H4	5	36055	3356.92	963.021	2572.79	1638.43
89	H5	5	37149.8	5490.68	11284.4	108587	-1266.49																89	H5	5	44760.6	4918.17	2577.44	3568.05	1234.21
90	H6	5	34579.4	5039.17	11864.1	116201	-902.911																90	H6	5	139892	11045.9	5743.4	5024.02	2948.82
91	H7	5	29795.7	4499.64	11737.3	109752	-2003.93																91	H7	5	31167.1	3003.66	2042.88	2161.93	1460.23
92	H8	5	30549	4563.75	12048.4	116421	-1017.37																92	H8	5	39194.2	2915.9	1919.29	1926.59	2772.93
93	H9	5	28801.6	4288.07	9907.9	104121	-1254.07																93	H9	5	43899.5	3762.13	2180.13	2347.84	1937
94	H10	5	27927.6	4431.01	9001.88	104497	1761.32																94	H10	5	59585.8	7380.83	14372.4	127891	1949.68
95	H11	5	31554.4	4865.17	8918.56	114686	-1635.44																95	H11	5	64640.5	8659.15	11700.9	137596	-864.141
96	H12	5	31918.7	5221.38	9027.37	118588	-1335.47																96	H12	5	87845.1	17178.2	12382.7	140970	-730.758
1	A1	6	57229.7	9029.39	8594.98	116104	-1309.6																1	A1	6	794142	128474	13282.3	143407	-2.74488
2	A2	6	62812.3	8551.41	8370.26	115000	-265.347																2	A2	6	817808	116708	13602.8	142868	341.348
3	A3	6	62380.3	7875.25	9577.98	112325	-1776.56																3	A3	6	783793	101304	14348.2	136102	-665.4
4	A4	6	613434	73716.2	11217.1	114854	-418.511																4	A4	6	51562	5188.04	13608.6	131755	916.815
5	A5	6	604179	69003.7	11764.7	109607	-988.09																5	A5	6	57343.8	5497.08	14902.1	130504	253.997
6	A6	6	602509	66297.8	11718.3	108218	-1353.42																6	A6	6	61252.8	4783.66	14968.6	130323	-309.686
7	A7	6	48472.4	6614.43	10979.1	105924	-913.119																7	A7	6	749356	83130.5	15891.7	131876	-602.424
8	A8	6	51018.4	6465.15	12243.8	113262	-1125.65																8	A8	6	807171	90760.7	16368.8	135597	-512.006
9	A9	6	45300.3	6511.79	10905.7	111537	-3114.25																9	A9	6	769492	91202.8	15502.8	133161	-1438.32
10	A10	6	49774.6	6739.79	9816.91	108756	-1640.57																10	A10	6	45489.3	4797.1	12805	133852	-670.103
11	A11	6	54390.3	8059.08	8543.88	107696	-1829.76																11	A11	6	49764	5782.97	12373	141107	-1011.86
12	A12	6	54600.8	9049.1	8661.85	115740	-2012.65																12	A12	6	56994.6	6332.55	11849.3	140613	-1624.39
13	B1	6	59894.2	8274.58	9275.42	122781	-2257.65																13	B1	6	71034.9	6565.88	13359.3	145979	-1016.19
14	B2	6	51254.8	7025.11	8380.07	99747.8	-1251.41																14	B2	6	135318	43016.9	16471.4	134393	-213.771
15	B3	6	51431	6235.78	9512.33	104206	-1310.77																15	B3	6	109226	9890.5	14241.1	123161	-357.4
16	B4	6	566902	63190.8	11531.8	111263	-309.397																16	B4	6	47873.8	4473.52	13914.2	121071	509.404
17	B5	6	558246	58623.3	10967.3	96511.1	108.796																17	B5	6	84016.6	5633.78	14281.9	114641	681.306
18	B6	6	539771	55241.3	10603.7	94519.7	51.2175																18	B6	6	43044	3959.93	13961.7	114363	206.495
19	B7	6	118723	12996.3	13217.6	109488	-1798.67																19	B7	6	803463	82449.7	16503.7	121442	-860.239
20	B8	6	122161	12669	11227.3	98640.6	-66.8544																20	B8	6	814759	85095.9	15264.9	120686	-46.9902
21	B9	6	124542	14043.7	11013.7	105959	-386.825																21	B9	6	830300	91605.1	15657.7	128158	178.036
22	B10	6	46802.4	6135.6	8743.88	88887.1	-665.141																22	B10	6	666869	81450.9	13393.3	115546	541.564
23	B11	6	39415.9	5389.76	9140.18	102175	-1376.61																23	B11	6	630660	84599	11930.9	111371	-458.78
24	B12	6	37131.8	6313.67	7379.51	94228.1	-831.244																24	B12	6	659325	101117	10779.6	113897	-164.25
25	C1	6	53773	8512.55	8347.73	103177	-1569.26																25	C1	6	61539.1	6264.72	12293.7	128361	-557.793
26	C2	6	54572.1	7573.52	9165.22	98467.7	518.767																26	C2	6	59719	6378.3	13561.9	124957	4038.86
27	C3	6	51203.5	6663.03	8967.98	94125.8	-1430.42																27	C3	6	52852.6	5566.86	12720.1	111366	-630.039
28	C4	6	40416.4	4590.46	10821.2	99821.3	-197.129																28	C4	6	36482.4	2959.1	1560.09	2392.87	1785.88
29	C5	6	54198.3	5623.17	10486.9	93744.7	356.619																29	C5	6	29877.8	1963.57	1201.55	2434.92	1270.38
30	C6	6	-13291.6	4213.26	10511.5	93272.1	-884.06																30	C6	6	-24562.1	2573.07	1047.21	1857.34	1101.92
31	C7	6	48729.6	5437.32	10917.7	91153.1	-993.038																31	C7	6	28866.4	2263.53	1733.42	1825.72	394.18
32	C8	6	44388.6	5395.9	11264.1	96810.5	-1177.12																32	C8	6	33147.5	2329.26	1829.05	2322.25	821.728
33	C9	6	11140.3	1631.83	9500.61	88319.6	-1027.81																33	C9	6	25421.7	2281.68	1104.81	1938.09	-286.027
34	C10	6	13217.8	2265.92	9368.92	91651.3	-1280.98																34	C10	6	34728.3	2395.88	1410.93	2008.51	1316.98
35	C11	6	13603.5	2433.76	8131.54	92389.4	-1095.15																35	C11	6	50878.4	5225.74	2383.24	4110.84	3024.19
36	C12	6	11953.8	2997.28	7269.05	91818	-294.273																36	C12	6	37733	3635.94	1467.16	2830.51	3304.53
37	D1	6	398277	55418.7	6709.58	75608.3	647.664																37	D1	6	123576	14661.3	11960.5	127961	1770.68
38	D2	6	462090	57598	11713.9	119666	614.158																38	D2	6	156477	18065.8	12878.7	118190	1804.14
39	D3	6	506736	56662.3	9974.91	94095.1	143.426																39	D3	6	132118	14004.9	12237.3	104463	734.753
40	D4	6	13430.4	1280.31	9929.26	88983.3	-33.6369																40	D4	6	45061.5	3931.36	13347.8	109875	608.326
41	D5	6	14976.5	1684.39	10257.8	88152.5	2688.05																41	D5	6	63886	14420.8	14402.3	103931	707.912
42	D6	6	15663.9	1758.86	10671.9	88339.1	-422.549																42	D6	6	43806.7	5418.08	14055.3	103288	272.961
43	D7	6	11943.1	1274.35	10156	86057.5	-1327.51																43	D7	6	38216.3	3265.28	13636.2	104566	-710.797
44	D8	6	16468.3	1667.51	10535.1	88538.6	-727.242																44	D8	6	51674.1	5633.94	14456.4	104362	2259.62
45	D9	6	12983.1	1963.55	10727.2	94059.5	-843.346																45	D9	6	41105.8	3991.53	13478.2	106594	-312.819
46	D10	6	24061.2	4449.91	8692.87	88507.2	56.2353																46	D10	6	46004.8	4195.3	13342.9	109500	991.53
47	D11	6	30252.2	7619.88	9748.37	102073	-1824.6																47	D11	6	47085.4	4694.32	12044.4	115499	-1016.6
48	D12	6	13557.6	2350.8	8187.98	95709.1	-1400.54																48	D12	6	41962.3	4417.98	10390.7	107650	-720.198
49	E1	6	399529	55822	9959.93	115974	150.141																49	E1	6	802896	111983	14461.7	142129	809.574
50	E2	6	395091	48968.2	9800.68	108808	-263.222																50	E2	6	778207	95568.5	14520.3	127191	2323.17
51	E3	6	509698	56349.5	10681.6	102173	958.012																51	E3	6	714584	78832.6	14192.2	117497	1697.76
52	E4	6	84986.2	9050.65	10080.5	90635	-52.1955																52	E4	6	62207.1	7103.15	13335.2	104202	497.675
53	E5	6	69139.1	7324.28	10130.9	85204.7	-38.1351																53	E5	6	46828.2	7688.76	12770.9	96192.6	608.387
54	E6	6	74040.7	7541.98	10226.4	84227.1	-429.982																54	E6	6	42874.7	4933.79	13286.7	99482.9	192.094
55	E7	6	17004.1	1607.07	10147.2	87590.2	779.326																55	E7	6	617954	60864.7	14398.8	104781	1342.69
56	E8	6	101911	17400.7	10779	85177.8	-775.648																56	E8	6	586933	58426.9	13612.9	100124	152.017
57	E9	6	14266.7	1755.67	10105.8	91810	-412.23																57	E9	6	627367	64948.6	13933.8	110608	305.433
58	E10	6	16658	2429.82	9467.17	92701	-169.85																58	E10	6	51161.7	6554.44	12128.6	105885	55.8634
59	E11	6	16948.4	2589.85	9768.74	102545	-82.1829																59	E11	6	64837	8079.98	13064.5	116402	921.235
60	E12	6	15160.3	2378.81	8201.55	98127.1	-1190.95																60	E12	6	77879.9	11940.7	11467.5	117530	-308.071
61	F1	6	22603.8	3278.36	10967.3	127267	-1229.91																61	F1	6	91007.6	11891.4	15849.4	157919	169.55
62	F2	6	22116	3748.56	10340.1	112067	-1692.25																62	F2	6	72616.2	8633.96	13403.2	131764	-555.37
63	F3	6	20243.6	3678.19	10587.3	101152	-1204.59																63	F3	6	77492	9140.16	14550	120922	-416.453
64	F4	6	18106.3	1853.81	12144	107590	607.065																64	F4	6	78998.4	18965.3	16222	115544	1396.02
65	F5	6	27674.5	3514.62	10363.8	91972.4	-145.269																65	F5	6	53796.2	5596.65	13155.5	105818	615.229
66	F6	6	24789.2	2775.75	11026.7	95067.4	-335.981																66	F6	6	56928.4	5822.42	14423.7	111179	53.3507
67	F7	6	25336.6	3164.06	10773.8	90371.5	-757.67																67	F7	6	672929	66228.7	14647.7	106500	3290.06
68	F8	6	28311.2	3682.87	12385.6	98805.1	-707.622																68	F8	6	793328	79073.8	15883.1	118710	-32.5192
69	F9	6	30531.4	3554.33	11096.6	100792	614.455																69	F9	6	769902	81292.6	15622.4	120680	2996.11
70	F10	6	508925	57607.3	10459.6	99848.1	-891.626																70	F10	6	722023	81300.5	14151.4	111564	-428.155
71	F11	6	563669	69875.3	10199	103368	241.063																71	F11	6	738724	91831.3	14061.6	120808	1271.76
72	F12	6	564396	80161.1	9706.24	106638	-1722.74																72	F12	6	740458	104631	13124.5	125004	-1235.96
73	G1	6	36906.1	5712.6	10305	132164	-2076.02																73	G1	6	232490	31714	15659.8	163617	-1040.04
74	G2	6	31575.6	4046	10195	118580	-998.659																74	G2	6	192929	26116	16033.1	156987	-354.578
75	G3	6	27945.2	4304.82	10780.3	112825	-1103.31																75	G3	6	184703	22667.7	15567.5	134973	-83.9821
76	G4	6	31852.4	4452.73	11252.9	109382	-1780.46																76	G4	6	110779	23340.1	17056.5	136639	-1273.67
77	G5	6	25514.3	3117.15	10404.9	92213	-336.107																77	G5	6	54134.2	5865.17	13803.8	110044	344.341
78	G6	6	27249.8	4158.96	11364	99256.4	-782.083																78	G6	6	73445.1	12760.7	15468.7	112321	1874.7
79	G7	6	28013.5	3927.98	10454.2	93024.7	-66.8271																79	G7	6	60065.4	6914.68	13838.3	106298	617.322
80	G8	6	29060.8	3434.47	11303.8	100337	-2173.67																80	G8	6	65511.9	7340.35	15093.6	116315	-60.2619
81	G9	6	29016.7	3744.23	10853.3	100680	207.668																81	G9	6	68478.9	8562.16	15472.9	123179	1627.57
82	G10	6	568023	67739.1	10566.4	97786.4	-225.421																82	G10	6	73629.3	7823.83	24715.3	231628	523.607
83	G11	6	553725	72724.5	9237.94	97438.5	-946.798																83	G11	6	63380.2	7387.76	12892.5	120635	-11.9621
84	G12	6	704447	103468	11011.4	121369	-2435.24																84	G12	6	77736.3	15525	15110.7	150655	-1893.36
85	H1	6	123906	20592.6	9365.48	127819	-251.599																85	H1	6	80016.5	11180.7	12674	151800	581.008
86	H2	6	120122	17544.1	9338.3	119779	-1186.29																86	H2	6	78627.3	10729.9	13640	161109	-376.403
87	H3	6	104116	13720.9	9697.66	113495	-1313.43																87	H3	6	71996.5	12173	13408	132188	-543.922
88	H4	6	30410.1	5025.01	9568.93	110390	-361.004																88	H4	6	36365.4	3615.15	1093.76	2801.5	2005.49
89	H5	6	36872.1	5416.05	10948.6	109108	-1061.04																89	H5	6	46022.8	4794.34	2766.72	3852.88	1614.72
90	H6	6	36339.8	4933.25	11988.6	116108	-1047.71																90	H6	6	139995	11198.8	5856.28	5620.18	3408.38
91	H7	6	30353.5	4123.77	11246.6	110491	-1952.77																91	H7	6	30529.3	3017.37	2128.09	1914.23	1456.21
92	H8	6	31936.8	4527.44	12041.1	116462	-716.905																92	H8	6	38132.9	3046.83	1910.57	2535.43	2718.97
93	H9	6	30350.3	4330.09	9942.78	104631	-1157.27																93	H9	6	43615.3	3904.36	2185.97	2857.98	2238.76
94	H10	6	27849.2	3636.9	9182.77	104982	2031.55																94	H10	6	59430.9	8122.3	14337.6	128244	2301.98
95	H11	6	31397.2	4969.77	8914.91	114943	-1419.37																95	H11	6	64207.2	8523.16	12028.5	138089	-736.775
96	H12	6	32404.2	5592.84	9296.71	118897	-636.784																96	H12	6	87341.3	17558.3	12574.4	141255	-258.4
1	A1	7	56154.5	8741.07	8606.39	116134	-1025.13																1	A1	7	790752	128421	13570	144018	-191.422
2	A2	7	62528.7	8496.55	9073.31	114603	-186.199																2	A2	7	815428	116487	13821.6	143062	733.275
3	A3	7	61709.9	7981.62	9976.89	112789	-1801.49																3	A3	7	780395	100851	14605.5	136133	-115.482
4	A4	7	612503	73438	11487.5	115128	-277.709																4	A4	7	51014.2	4949.4	13729.5	132117	685.929
5	A5	7	602790	68651.4	11835.8	109630	-1349.58																5	A5	7	57423.3	5518.86	15324.9	130397	424.196
6	A6	7	601465	65951.6	11541	108348	-1105.24																6	A6	7	62109.2	4861.37	15315.4	130206	-581.542
7	A7	7	49068.7	6389.47	10941.4	105985	-1413.65																7	A7	7	749495	82683.3	16000.3	132388	-979.634
8	A8	7	51816.6	6668.49	12198.4	112736	-1700.98																8	A8	7	805937	91187.4	16606.3	135758	-665.733
9	A9	7	44488.6	6064.82	11206.4	111099	-3133.96																9	A9	7	769271	91075.5	15411.5	133788	-1561.62
10	A10	7	49482.6	6850.32	10276.8	109038	-1743.37																10	A10	7	44701.7	4628.85	13517	133780	-1070.26
11	A11	7	53983.8	8546.65	8486.72	108184	-1807.05																11	A11	7	50716.6	5525.44	12448.5	141035	-1197.77
12	A12	7	54816.4	8628.96	8570.02	115640	-2171.43																12	A12	7	55845.6	6304.61	12219.5	140396	-1044.54
13	B1	7	60125.9	9353.95	9222.47	123135	-1777.25																13	B1	7	71107.9	6870.84	12704.6	146680	-1293.05
14	B2	7	51234.1	7307.93	8566.67	99449.4	-1271.92																14	B2	7	134349	43279.3	16444.9	134795	169.04
15	B3	7	50791.6	6140.96	9890.86	104136	-1543.75																15	B3	7	109299	10037.3	14258.4	123796	-17.8162
16	B4	7	567584	63028.6	11528.1	110896	-550.287																16	B4	7	48076.5	4640.6	13520.3	121952	269.361
17	B5	7	557651	58743.3	11035	96511.4	228.557																17	B5	7	84349.9	5442.18	13959.1	114070	1113.23
18	B6	7	539179	54970.6	11019.3	94290.9	-16.3699																18	B6	7	43572	4063.78	14025.4	114002	386.709
19	B7	7	118926	13001.7	13276.9	109140	-1394.86																19	B7	7	803198	82203.3	15985.7	121971	-1014.29
20	B8	7	122485	12654.7	11241.6	98766.9	-361.018																20	B8	7	812720	84867.8	15366.1	120888	-57.5556
21	B9	7	125047	13830.2	11177.7	105413	-573.729																21	B9	7	830043	91401.6	15648.2	128807	96.0291
22	B10	7	45675.8	6085.4	8838.03	88585.8	-999.782																22	B10	7	665093	80930.5	13657.9	115737	613.809
23	B11	7	38918.5	5195.03	9318.07	101713	-1493.17																23	B11	7	628951	84208	11832.7	111673	-529.933
24	B12	7	37011.8	6212.04	7199.21	93878.7	-777.427																24	B12	7	655653	100292	10486.8	113871	-0.216421
25	C1	7	52761.9	8000.18	8703.45	102720	-1158.15																25	C1	7	62712	6111.54	12111.5	128504	-71.9204
26	C2	7	54442.9	7868.56	9512.07	99392.1	633.526																26	C2	7	60140.3	6690.56	13187.3	124925	3622.89
27	C3	7	50947.9	6791.86	9384.71	94093.7	-1504.17																27	C3	7	52617.3	5674.85	12953	111910	-470.632
28	C4	7	40798.9	4763.04	10934.2	99548.8	-112.528																28	C4	7	35567.7	2816.75	1660.3	2246.7	1784.81
29	C5	7	53570.4	5717.84	10639.9	93870	217.085																29	C5	7	30137.5	2006.95	1335.3	1964.73	1061.19
30	C6	7	-12814.8	4090.51	10444.3	93095.7	-599.317																30	C6	7	-24869.8	2629.53	1195.35	1787.23	839.453
31	C7	7	48893.3	5288.94	11035.9	91061.6	-1077.07																31	C7	7	28915.9	2313.17	1672.86	1908.07	414.672
32	C8	7	44945.7	5425.9	11498.4	96325.4	-1097.12																32	C8	7	32667.3	2400.29	1875.16	2317.81	643.841
33	C9	7	12029.5	1852.02	9635.9	88745.1	-1169.81																33	C9	7	25377.8	2259.39	1313.35	1733.14	-528.295
34	C10	7	13422.8	1895.29	9475.89	91733.3	-1036.44																34	C10	7	33960.4	2323.38	1561.55	2010.17	1238.55
35	C11	7	13063.6	2281.78	8269.49	92607.6	-1524.48																35	C11	7	50014.1	4828.08	2727.11	3423.28	2732.05
36	C12	7	11220.7	2895.28	7148.5	91618.9	-277.979																36	C12	7	38228.1	3760.16	1326.84	2763.68	2929.02
37	D1	7	398528	55826	6192.45	75841	326.612																37	D1	7	123996	13942.9	11691.9	128264	1396.99
38	D2	7	462414	57640.6	11811.3	119597	612.722																38	D2	7	157328	17993.7	12699.8	118282	2188.26
39	D3	7	506483	56458.4	10178.6	94221.2	84.5299																39	D3	7	132924	14134.2	12407.5	104607	878.652
40	D4	7	13203.9	1317.85	9921.85	88958.2	-308.94																40	D4	7	45307.1	3809.58	13735.7	109850	402.786
41	D5	7	15350.4	1797.99	10183.7	88659.6	2591.99																41	D5	7	63203.4	14633.8	14527.1	104122	516.852
42	D6	7	15772.1	1542.32	10417.5	88155.3	-440.054																42	D6	7	43951.9	5779.12	13951.8	103683	113.754
43	D7	7	12112.7	1335.06	10081.8	85847.6	-1325.01																43	D7	7	38259	3265.1	13878.1	104604	-651.776
44	D8	7	16102.5	1564.52	10405.9	88891	-590.599																44	D8	7	51730.4	5687.42	14155.9	104781	2221.51
45	D9	7	12810.4	1701.2	10779.7	93929.8	-899.284																45	D9	7	40866.5	4072.95	13585	106157	-507.234
46	D10	7	23395.9	4325.9	8860.72	88505.6	193.785																46	D10	7	45488.5	4400.78	13478.2	110117	1026.78
47	D11	7	30178.2	7415.88	9760.66	102037	-1461.75																47	D11	7	46759.7	4565.9	12026.5	115770	-1142.63
48	D12	7	13573	1908.39	8257.91	95601.5	-1306.57																48	D12	7	41490.3	4166.51	10381	107473	-817.228
49	E1	7	401488	55391.2	9875.94	115870	245.968																49	E1	7	799143	111104	14248.4	142139	989.352
50	E2	7	395886	48745.3	9647.28	108763	-315.995																50	E2	7	774324	95016.5	14696.3	127419	2480.16
51	E3	7	510668	56317.1	10620.2	102334	908.461																51	E3	7	711930	78179.2	14470.4	117706	1839.89
52	E4	7	84431.5	8637.38	10251.4	90690.9	-379.684																52	E4	7	61674.4	6857.16	13211.7	104347	199.127
53	E5	7	69716.2	7353.37	10474.6	84778	5.15126																53	E5	7	46675.5	7588.28	12779	96187.8	631.392
54	E6	7	73863.5	7432.24	10041.1	84068.2	-222.548																54	E6	7	42753.4	5037.33	13550	99373.2	349.41
55	E7	7	17101.5	1838.49	10310.5	87706.6	780.612																55	E7	7	617011	60755.3	14284.1	104774	1306.75
56	E8	7	104629	17593.1	10740.1	85368.4	-587.119																56	E8	7	585870	58500.9	13705.6	99833.3	196.64
57	E9	7	14754.4	1748.82	10221.5	92159.2	-144.206																57	E9	7	627363	64800	14294.6	110673	477.391
58	E10	7	17117.6	2099.67	9585.83	92425.3	-296.868																58	E10	7	50628.9	6067	12247.9	106218	196.131
59	E11	7	17601.1	2336.42	9884.97	102554	-510.25																59	E11	7	64780.4	7811.72	13262.5	116191	1285.53
60	E12	7	15765.5	2416.64	8152.91	97987.9	-1307.85																60	E12	7	77655	11512.5	11246.8	116657	137.603
61	F1	7	22726.2	3071.09	10487.6	127010	-1105.75																61	F1	7	91141.7	11979.8	16068.3	158153	220.458
62	F2	7	23525.2	3454.16	9813.26	111710	-1549.18																62	F2	7	72454.3	8543.45	14130	132889	-724.618
63	F3	7	21179	3122.76	10433.1	101291	-1397.75																63	F3	7	78706.5	9019.25	14694.4	121083	-628.716
64	F4	7	17219.6	1681.83	11817.6	108026	658.135																64	F4	7	79696.9	19843.8	16685.3	115471	1739.33
65	F5	7	27257.4	3141.01	10532.4	92007.2	234.669																65	F5	7	53849.7	5602.48	13423.5	106376	807.265
66	F6	7	24698.1	2667.72	11152.8	95275.4	-774.031																66	F6	7	56727.2	5720.93	14546.7	111543	-19.2798
67	F7	7	25664.2	2908.4	10792.9	89645	-749.98																67	F7	7	671709	66503	14912.9	106945	3422.3
68	F8	7	28436.4	3657.04	12234.8	98710.2	-776.629																68	F8	7	792192	79342.3	16284	119006	274.061
69	F9	7	30748.6	3426.85	11085.3	100600	964.729																69	F9	7	768526	81205.5	15891.5	120620	2655.25
70	F10	7	509003	57419.6	9888.89	99252	-1275.26																70	F10	7	721047	81425.3	14078.5	111814	-331.28
71	F11	7	565014	69562.1	10530.4	103962	461.66																71	F11	7	735554	91484.8	13865.3	120382	1331.2
72	F12	7	565946	79732.2	9947.86	106418	-2284.41																72	F12	7	737948	104697	13632.7	125409	-659.333
73	G1	7	36226.9	5289.06	10840.6	132321	-1764.99																73	G1	7	231653	31562	15439.4	163794	-515.053
74	G2	7	30708.9	3921.5	10101.3	118105	-810.334																74	G2	7	192979	26106.7	16034.8	157339	-570.503
75	G3	7	29367.3	4053.2	10728.4	112962	-1341.09																75	G3	7	184396	22666.5	15672.7	135511	-727.433
76	G4	7	32221	4684.27	11037.7	109097	-1967.52																76	G4	7	111394	23709.2	16985.4	137573	-1541.53
77	G5	7	25392	3366.49	10159.9	92471.4	-558.9																77	G5	7	54163.4	5758.77	13691.9	109937	408.604
78	G6	7	27623.2	4546.96	11308	99091.6	-1088.31																78	G6	7	72813.1	12984.8	15745.6	112450	1658.12
79	G7	7	28068.2	3642.26	10545.1	92489.5	14.2897																79	G7	7	59927.5	7076.03	13688	106192	1171.29
80	G8	7	29698.8	3770.07	11167.3	100856	-1919.09																80	G8	7	65724.6	7462.59	14830	116697	25.649
81	G9	7	29843.8	3771.53	11353.6	101055	246.7																81	G9	7	66522.8	8284.58	15665.2	123432	1544.51
82	G10	7	567346	67522	10311.8	98200.7	-151.944																82	G10	7	74457.7	8076.5	24476.9	231663	644.999
83	G11	7	553857	72808.4	9708.82	97747.9	-1455.63																83	G11	7	63710.4	7428.55	13035	121308	134.999
84	G12	7	704516	102714	11215.5	121797	-2477.86																84	G12	7	76509.8	16186.8	15202.5	150444	-1810.55
85	H1	7	125209	20733.7	9619.37	128328	-500.804																85	H1	7	78910.7	10977	12087.9	151667	-91.4251
86	H2	7	120703	17598.8	8579.8	119346	-1487.31																86	H2	7	77926.5	9821.03	13926.7	161024	-453.758
87	H3	7	104251	13307.8	9428.96	113393	-1736.84																87	H3	7	71941.1	12605.4	14032.1	132640	-55.7607
88	H4	7	30032.2	4953.92	9408	110251	-16.5093																88	H4	7	37445.9	3452.19	1259.55	2410.36	1612.93
89	H5	7	37438.8	5295.16	10995.3	109427	-1063.17																89	H5	7	44512.8	5213.37	2862.95	3429.38	968.536
90	H6	7	36460.2	4576.46	11861.5	116138	-1089.6																90	H6	7	139349	11145.3	5585.56	5311.71	3252.09
91	H7	7	30633.1	4239.73	11576.7	110515	-1863.22																91	H7	7	30515.7	2821.4	2241.39	2660.66	1232.09
92	H8	7	30966.4	4348.7	11906.1	116703	-378.844																92	H8	7	38570.8	2836.91	1745.9	2816.81	2472.45
93	H9	7	28839.4	3900.08	9778.47	104998	-1120.22																93	H9	7	43644.1	3717.96	2126.48	2593.25	1725.48
94	H10	7	27479.1	3952.36	9091.12	104955	1568.39																94	H10	7	61277.2	7217.56	14835.5	128449	1654.43
95	H11	7	31507.3	4900.54	8737.3	114651	-1657.91																95	H11	7	65395.2	8664.77	12593.8	138951	-1294.12
96	H12	7	32596.4	6035.93	9374.92	118644	-1500.19																96	H12	7	87466.1	17195	12999.3	141124	-1007.71
1	A1	8	58002.2	9128.1	8940.18	115945	-1227.76																1	A1	8	788109	126863	13321.6	143207	-201.265
2	A2	8	62955.3	8260.05	8688.11	114942	-339.683																2	A2	8	811584	116023	13742.5	142831	426.78
3	A3	8	62241.3	7989.36	10093.6	112984	-1639.04																3	A3	8	777698	100576	14292.4	136030	-53.5118
4	A4	8	611789	73026	11518	114838	-228.773																4	A4	8	51415.1	4824.78	13675	132287	611.974
5	A5	8	603087	68713	11819	109928	-569.238																5	A5	8	57634.4	5286.01	15244.2	130980	753.144
6	A6	8	602418	66015.1	11982.8	108160	-1174.61																6	A6	8	61963	4677.46	15037.3	130116	-442.703
7	A7	8	49029.2	6628.94	11247.9	106043	-1087.13																7	A7	8	748522	82707.2	15929.2	132641	-598.765
8	A8	8	51781	6480.12	11888.7	113145	-1463.75																8	A8	8	805788	90719.6	16834.4	135691	-312.742
9	A9	8	44738.9	6220.88	10897.3	111124	-3482.62																9	A9	8	770085	91410.7	15644.3	132981	-1575.51
10	A10	8	49888.9	6843.46	9896.6	108655	-1817.04																10	A10	8	44542.2	4728.75	13170.9	133513	-873.21
11	A11	8	53912.1	8363.67	8967.57	107823	-1992.73																11	A11	8	50412	6022.76	12534.9	140667	-753.147
12	A12	8	54985.2	9067.74	8409.49	115218	-1681.83																12	A12	8	55942.3	6459.89	11648.1	139718	-1432.46
13	B1	8	60206	8700.84	8948.61	122947	-1963.68																13	B1	8	70861.6	6777.52	12988.4	146056	-1373.05
14	B2	8	51276.8	6747.39	8284.31	99531.1	-1253.84																14	B2	8	134116	43082.4	16486.7	134949	-257.608
15	B3	8	51516.8	5922.28	9608.67	104081	-1049.82																15	B3	8	109959	9750.66	14213.1	123372	-229.488
16	B4	8	567303	62974.6	11588.6	111454	-349.43																16	B4	8	47973.3	4357.17	13660.9	121601	365.172
17	B5	8	559300	58206.7	10549.6	96623.3	492.657																17	B5	8	83377.5	5339.65	13781.1	114153	731.614
18	B6	8	538632	54793.5	10600.9	94734.4	-48.2751																18	B6	8	43839.3	4013.1	13653.2	114047	258.463
19	B7	8	118399	12699.9	13028.9	109550	-1739.67																19	B7	8	801047	81981.8	16169.8	121429	-1001.27
20	B8	8	122456	12468	10980.5	98819.6	-347.695																20	B8	8	812899	84611.8	15343.6	120959	-52.1479
21	B9	8	124658	13432.4	11209.2	106180	-152.285																21	B9	8	830252	91027.8	15697.5	128186	-83.2302
22	B10	8	46207.7	6025.07	8985.57	88672.7	-1063.8																22	B10	8	663878	80711.9	13517	115476	332.417
23	B11	8	39297.1	5083.23	8891.93	102382	-1409.74																23	B11	8	627203	83860.4	12251	111304	-453.957
24	B12	8	37015	5579.89	7303.09	94380.8	-1111.32																24	B12	8	652924	100049	10831.1	114183	-18.9512
25	C1	8	53669.3	8080.23	8377.09	101993	-1303.2																25	C1	8	61816.1	6282.51	12329.5	128677	-535.981
26	C2	8	53725.1	7537.42	9320.48	98883	545.836																26	C2	8	60419.5	6349.19	13464.9	124582	4222.28
27	C3	8	51523.4	6294	8907.2	94304.1	-1719.23																27	C3	8	53112.3	5691.25	12710.4	111514	-76.8055
28	C4	8	40636.1	4478.33	10818.8	99654.8	-313.376																28	C4	8	36079.7	2595.55	1859.12	2533.92	1845.26
29	C5	8	53869.9	5317.92	10231.2	93830.9	167.775																29	C5	8	30355.7	2058.11	1356.3	2176.78	1195.44
30	C6	8	-12818.4	4118.37	10417.3	93153.4	-929.393																30	C6	8	-24979.9	2588.21	903.145	1955.22	1283.58
31	C7	8	48829.8	5185.94	11217.6	91324.1	-1428.89																31	C7	8	28474.8	2256.72	1997.74	2075.17	154.266
32	C8	8	43974.8	5334.71	11392.2	96691.9	-983.326																32	C8	8	32765.9	2491.48	1804.39	1978.71	695.159
33	C9	8	11979.2	1637.46	9483.02	88705.7	-1072.8																33	C9	8	25789	2224.37	1190.14	1996.82	-515.919
34	C10	8	13611.6	2015.66	9408.02	91998.3	-1281.5																34	C10	8	33501.5	2519.7	1688.95	2185.6	1549.95
35	C11	8	13264.6	2389.25	8461.46	92098.1	-1232.67																35	C11	8	49805.7	4632.6	2588.17	3943.13	3256.4
36	C12	8	12639.7	2602.2	7165.01	91537.9	-399.161																36	C12	8	38333.4	3554.41	1665.57	3255.89	3303.36
37	D1	8	399327	56143.3	6556.04	75709.3	247.195																37	D1	8	123062	14295.7	11468.6	128425	1411.46
38	D2	8	463871	57182.3	11669.1	119774	461.919																38	D2	8	157206	17819.5	12678	118336	1872.7
39	D3	8	505551	56322.3	10063.8	94572.4	-161.606																39	D3	8	133246	13962.7	12236.6	104990	788.982
40	D4	8	13857.4	1360.51	9856.33	89105.4	-86.977																40	D4	8	44760.1	3882.86	13319.7	109978	672.331
41	D5	8	14905.7	1575.02	10221.1	88107.6	2223.65																41	D5	8	63384.5	14746.3	14605	104037	538.632
42	D6	8	14565.4	1751.97	10248.8	88510.8	-535.357																42	D6	8	43626.3	5742.11	13643.2	103404	249.524
43	D7	8	12596.6	1236.32	10032	86169.1	-1219.33																43	D7	8	38206.9	3399.24	13525.2	104676	-568.454
44	D8	8	16011	1472.68	10207.6	88671.9	-954.639																44	D8	8	51440.7	5445.04	13927.3	104497	2111.08
45	D9	8	13210	1431.46	10739.7	93734.9	-789.064																45	D9	8	41111.4	3791.37	13130.8	106214	-240.4
46	D10	8	23580.7	4276.51	8531.25	88702.9	-76.0163																46	D10	8	46663	4435.97	13468.3	110054	1223.75
47	D11	8	31752.3	7329.9	9771.5	102200	-1703.18																47	D11	8	46832	4467.61	12257.6	115941	-1019.98
48	D12	8	13547	2115.16	7938.29	95140.1	-1383.62																48	D12	8	41033.3	4464.6	10422.3	107747	-638.97
49	E1	8	400759	56135.3	9774.54	115884	14.3762																49	E1	8	796724	110763	14238.6	141906	947.315
50	E2	8	397414	48991	9827.57	109005	-194.159																50	E2	8	770985	94710.8	14381.1	127552	2093.03
51	E3	8	509010	56595	10744	102184	991.5																51	E3	8	709745	78268.6	14095.8	117893	1794.36
52	E4	8	84845.9	8843.35	10255.8	90602.1	40.0072																52	E4	8	60599.9	6626.52	13207.8	104531	387.825
53	E5	8	69282.1	7409.41	10283.9	85030.2	158.476																53	E5	8	47058.7	7404.6	12459.3	95863.9	620.965
54	E6	8	73772.8	7772.58	10147.8	83922.3	-210.255																54	E6	8	42700.6	5037.06	12860.1	99324.1	348.328
55	E7	8	17760.5	2082.72	10141.3	87616.5	738.809																55	E7	8	615414	60933.6	14142.4	104652	1437.96
56	E8	8	107361	18422.1	10637.9	85570.1	-713.443																56	E8	8	586279	58389.7	13626.5	100092	79.9827
57	E9	8	14234.2	1764.84	10133.4	92203.6	-74.7009																57	E9	8	627664	64702.9	14276.4	110763	472.654
58	E10	8	16376.3	2297.6	9353.33	92918.1	-125.761																58	E10	8	52036.7	6337.6	12023.9	106359	136.304
59	E11	8	16951	2713.72	10074.1	102807	-122.71																59	E11	8	65464.5	7890.45	13381.4	115879	951.147
60	E12	8	15100	2513.04	8145.11	98122.3	-1025.67																60	E12	8	76516	11672.3	10511.2	116938	114.636
61	F1	8	21826.4	3234.85	10375.5	126998	-1340.28																61	F1	8	90620	11489.3	15937.8	158308	174.437
62	F2	8	22467.3	3647.23	10163.1	112064	-1431.39																62	F2	8	72309.6	8186.58	13634.3	132311	-708.272
63	F3	8	20164.3	3425.38	10485.1	101267	-1306.87																63	F3	8	79631.4	8585.22	14233.6	121455	-536.228
64	F4	8	17716.4	1764.05	11560.1	107359	522.947																64	F4	8	79671.5	19432.2	16292.5	115678	1586.1
65	F5	8	28061.7	3157.79	10204.7	91650.5	-51.6249																65	F5	8	53998.9	5304.15	13029.5	105516	546.083
66	F6	8	24613.3	2599.5	11258.5	95182.8	-422.728																66	F6	8	56993.2	5291.55	14169.5	111281	-23.0364
67	F7	8	25524.8	2729.86	10735.6	89757.7	-398.74																67	F7	8	671880	66132.2	14715	106787	3138.88
68	F8	8	29340.9	3574.63	12507.2	98778.5	-656.183																68	F8	8	791465	78955.9	16003.4	118736	113.304
69	F9	8	31092.4	3516.43	10694	100586	921.717																69	F9	8	767155	80470.3	15606.7	120666	2762.93
70	F10	8	511058	57467.1	10079.1	99805.2	-1070.75																70	F10	8	719525	80978.3	13928.3	111771	-439.292
71	F11	8	564919	70369.9	10301.6	103703	-101.652																71	F11	8	733767	91100.3	13294.4	120512	1024.42
72	F12	8	565498	79890.3	9854.19	106274	-2194.14																72	F12	8	735898	104136	13395.9	125166	-975.035
73	G1	8	37348.3	5603.7	10529	132226	-1869.85																73	G1	8	231289	31943.4	15671.9	163610	-755.779
74	G2	8	31764.6	4340.89	10136.3	118698	-990.679																74	G2	8	193303	26085.7	15485.7	157795	-32.2083
75	G3	8	28170.1	4037.59	11085.4	113208	-1378.21																75	G3	8	185858	22703.3	15842	134921	-325.474
76	G4	8	31679.3	4725.56	11118.4	109458	-1846.5																76	G4	8	112866	23804.6	16555.3	138138	-1109.83
77	G5	8	25424.3	3518.58	10056.5	92612.3	-421.365																77	G5	8	53974.2	5682.57	13421.6	109804	299.626
78	G6	8	27631.3	4420.98	11328.6	99011.9	-726.465																78	G6	8	73087.4	12816.2	15894.7	112491	1767.26
79	G7	8	27999.2	3866.87	10548.8	93087.5	135.662																79	G7	8	59823.9	6902.43	13540.6	106430	571.771
80	G8	8	29049.8	3668.66	11116	100730	-1669.91																80	G8	8	65909.6	7298.41	15152.9	116566	25.961
81	G9	8	29340.6	3831.49	11083.1	101545	261.686																81	G9	8	68654.9	8736.47	15410.3	123587	1386.43
82	G10	8	567328	67970.2	10538.1	97993.1	-494.709																82	G10	8	75380.8	7897.1	24375.6	231758	802.001
83	G11	8	554122	72955.8	9881.35	97619.4	-965.13																83	G11	8	63237	7951.19	13091.9	121025	468.645
84	G12	8	704097	103418	10981.7	121302	-2438.58																84	G12	8	76997.6	15922.8	15401.9	150856	-2368.06
85	H1	8	125409	21155.3	9765.92	128064	-634.683																85	H1	8	78638.7	11663.3	12537.8	151176	915.541
86	H2	8	119434	18059.7	9066.62	120057	-1358.12																86	H2	8	77924.5	10628.8	14064.7	160713	64.0824
87	H3	8	104354	13692.3	9824.38	113722	-1577.01																87	H3	8	71828.1	12190.3	13653.5	132094	-605.486
88	H4	8	29380.7	5016.25	9911.47	110314	-453.828																88	H4	8	36529.4	3769.78	1310.93	2284.39	1417.36
89	H5	8	37865	5894.28	11382.5	109730	-828.644																89	H5	8	45495.1	5008.58	2532.31	3334.91	1545.68
90	H6	8	35538.9	4939.94	12066.7	116838	-972.897																90	H6	8	139802	11462	5999.33	5089.45	2851.28
91	H7	8	29472.5	4333.13	11292.9	110343	-2299.22																91	H7	8	30994.8	2863.36	2304.83	2444	1298.52
92	H8	8	31165.1	4739.03	12240.2	116931	-498.848																92	H8	8	39466.4	3181.97	2099.16	2311.62	2871.62
93	H9	8	29221	4394.29	10139.1	104988	-787.564																93	H9	8	44511.8	3926.89	2390.67	2926.06	1919.22
94	H10	8	28108	4309.84	8995.96	104836	1594.02																94	H10	8	60178.6	7836.21	15115.5	128388	2308.68
95	H11	8	31580.6	5305.76	9077.24	114533	-1360.81																95	H11	8	64529.9	9101.36	12370.9	138265	-897.145
96	H12	8	32445.7	6091.48	9465.07	119119	-1059.03																96	H12	8	87707.9	18320.4	13188.3	140946	-728.816
1	A1	9	58284.8	9078.58	8653.75	116707	-1367.88																1	A1	9	786851	127279	12726.4	142973	-374.807
2	A2	9	63220.2	8709.38	8925.28	114955	-281.32																2	A2	9	810151	115224	13455.9	143462	446.904
3	A3	9	62416.2	7645.58	9914.19	112837	-1846.79																3	A3	9	775414	100560	14592.5	136384	-674.769
4	A4	9	611603	73685.8	11372	114888	-284.685																4	A4	9	51383.5	4407.91	13766	132060	382.879
5	A5	9	602493	68632.1	11890.5	110159	-1156.8																5	A5	9	57542	5046.52	15029.9	130713	368.259
6	A6	9	601641	66412.5	11639.7	108029	-1479.98																6	A6	9	62687.2	4803.32	14582.1	130138	-977.128
7	A7	9	49479.4	6653.83	11179.3	106382	-1140.43																7	A7	9	747746	82777.6	16210.6	132486	-1028.79
8	A8	9	51943.7	6596.35	12105.1	113376	-1468.25																8	A8	9	805941	90411.2	16547.5	136159	-963.358
9	A9	9	44235.9	6465.76	10646.3	111401	-3276.39																9	A9	9	769677	90801.5	15304.9	133965	-1746.16
10	A10	9	49982.5	7442.52	9664.47	109376	-1814.44																10	A10	9	44602.8	4474.49	13283.9	133755	-1170.52
11	A11	9	54655.1	8290.93	8719	108149	-2235.59																11	A11	9	50383.5	5454.53	12584.2	141097	-1064.97
12	A12	9	54717	9366.98	8937.95	115729	-1546.68																12	A12	9	56308.9	6680.82	11588.2	140624	-1286.97
13	B1	9	60024.4	8088.26	9435.72	122350	-2173.44																13	B1	9	70546.9	7402.38	12522.7	145818	-915.396
14	B2	9	51026.1	7274.12	8505.02	99744	-1458.67																14	B2	9	136060	44468.8	16758	134472	-116.057
15	B3	9	51356.4	6195.18	9613.23	104292	-1225.03																15	B3	9	111233	10101.6	14806.8	123385	47.8416
16	B4	9	568053	63071.8	11602.1	111283	-378.683																16	B4	9	47899.5	4282.31	13705.8	121738	195.314
17	B5	9	556928	58251.9	11044.5	96814.4	537.334																17	B5	9	84049.4	5758.22	14289.7	113858	676.358
18	B6	9	538662	55054.8	10764.3	94859.5	-288.912																18	B6	9	42543.5	4158.31	13829	114254	505.81
19	B7	9	119640	13102.3	13204.6	109353	-1542.29																19	B7	9	801714	81907.8	16614.8	121644	-1012.58
20	B8	9	122875	12723.4	10789.5	98658.1	-383.241																20	B8	9	812018	84575.6	15330.8	121064	161.893
21	B9	9	124438	13571.9	11176.4	106269	-311.084																21	B9	9	829644	91429.9	15444.3	128582	348.043
22	B10	9	45806.5	6188.06	8685.34	88952	-894.225																22	B10	9	660841	80616.4	13531.9	115582	617.183
23	B11	9	38851	5190.17	9019.2	102074	-1329.56																23	B11	9	626230	84147.5	12003.7	111016	-350.397
24	B12	9	36759.1	5818.7	7612.32	94103.8	-717.108																24	B12	9	650565	100123	11254.3	113460	-88.791
25	C1	9	53015.4	8003.55	8324.62	102585	-1514.49																25	C1	9	62577.7	6800.51	12379.1	127741	-621.47
26	C2	9	53803.8	7731.51	9350.7	99088.6	549.091																26	C2	9	59975.3	6316.84	13234.8	124921	4048.38
27	C3	9	51443.9	6674.14	8973.46	94159.1	-1701.25																27	C3	9	52781.4	5634.15	12333	111444	-526.681
28	C4	9	41038.8	4729.16	10783.6	99812.3	-251.239																28	C4	9	35771.1	2855.12	1731.17	2255.57	1635.39
29	C5	9	53425.3	5692.15	10481.4	93817.3	31.6662																29	C5	9	30148.7	2046.02	1218.94	2144.73	1551.8
30	C6	9	-13668.1	4127.45	10277	93404.4	-721.444																30	C6	9	-24464.7	2456.81	1263.08	1578.74	1196.74
31	C7	9	48376.8	5216.1	10880.3	91215.1	-1135.07																31	C7	9	28371.2	2332.27	1702.58	1984.89	465.886
32	C8	9	43885.6	5084.42	11526.5	96608.4	-1115.73																32	C8	9	33318.8	2721.75	2026.12	1858.48	817.741
33	C9	9	11994.2	1684.27	9433.31	88594	-1175.19																33	C9	9	25993	2279.82	1243.71	1770.3	-605.294
34	C10	9	13406.1	1836.55	9552.86	91818.6	-1246.72																34	C10	9	34485	2195.17	1562.89	1935.43	1388.51
35	C11	9	13205.6	2321.76	8389.16	92473.6	-1336.18																35	C11	9	50231.1	4846.45	2824.82	3592.99	2717.59
36	C12	9	12394.4	2922	7213.36	91229.7	-605.095																36	C12	9	39241	3986.27	1389.31	2929.35	3346.5
37	D1	9	401009	56404.2	6232.85	75661.9	488.351																37	D1	9	123720	14796.9	11835.4	128187	1199.37
38	D2	9	464839	58117.3	11620.2	119998	479.982																38	D2	9	157892	18115.7	12601	118622	1899.68
39	D3	9	506105	56549.8	10132	94553.5	-29.8674																39	D3	9	133602	14521.7	12046.8	104884	1174.55
40	D4	9	13767.9	1364.57	9784.31	89128	-82.559																40	D4	9	45628.9	3762.76	13628.8	109706	371.062
41	D5	9	15048.7	1671.01	9800.99	88586.6	2114.08																41	D5	9	64082.1	15104	14475.8	103700	694.011
42	D6	9	16111.2	2043.22	10353.7	88492.1	-361.196																42	D6	9	43971.6	5550.5	13716.1	103191	223.611
43	D7	9	12620.4	1712.63	10054.6	86275.3	-994.246																43	D7	9	37896.4	3377.17	13663.7	104535	-796.74
44	D8	9	16324.3	1582.86	10175.4	88992.9	-637.479																44	D8	9	52004.8	5656.76	13878.3	104585	2245.53
45	D9	9	13456.9	1947.75	10344.8	94209.3	-641.547																45	D9	9	40490.9	4069.55	13305.1	106071	-35.5534
46	D10	9	23763.2	4858.47	8592.19	88555.2	-37.5331																46	D10	9	46579.6	4491.87	13690.9	110010	1172.36
47	D11	9	31752.9	8119.21	9980.01	102467	-1556.32																47	D11	9	47459.8	4106.78	12276.2	115527	-567.84
48	D12	9	13518	2358.61	7829.33	95685.1	-1457.47																48	D12	9	42362.8	4695.25	10228.6	107579	-669.483
49	E1	9	402722	56156.9	9551.67	116031	114.134																49	E1	9	795067	110486	13567.3	142021	1283.57
50	E2	9	397645	49387.3	10206	109067	-236.182																50	E2	9	770593	94718.6	14531.1	127308	2714.93
51	E3	9	509009	55939.7	10480.3	102614	910.575																51	E3	9	709284	78167	14191.6	117869	1889.35
52	E4	9	85254.4	9020.03	10169.8	90791.7	174.795																52	E4	9	61189.2	6649.55	13486.2	104666	500.263
53	E5	9	69184.2	7615.62	10215.9	85252.6	-15.2208																53	E5	9	46819.6	7322.5	13234.6	96175.9	561.784
54	E6	9	74383.2	7581.74	10279.4	83879.1	-13.3691																54	E6	9	42781.4	4770.57	13138.7	99484.3	635.457
55	E7	9	17431.1	2129.27	10310.9	87852.8	936.566																55	E7	9	616778	60714.6	14201.3	104811	1674.33
56	E8	9	110199	18942.4	10728.4	85531.5	-567.29																56	E8	9	587029	58384.6	13467	100107	167.343
57	E9	9	14575.6	1980.2	10349.2	92335	-450.721																57	E9	9	629071	65124	14015.3	110889	506.818
58	E10	9	16624.4	2704.34	9807.47	92516.1	-333.005																58	E10	9	51140.5	5896.26	12257.2	106279	-49.1799
59	E11	9	16307.9	2605.66	9856.89	102636	-251.951																59	E11	9	65692.6	7825.7	13209.3	116304	827.038
60	E12	9	15067.7	2772.62	8008.71	97891.2	-867.183																60	E12	9	79353	12284	10612.2	116863	-173.31
61	F1	9	22266.5	3499.7	10701.3	127068	-1248.54																61	F1	9	92200.9	11764.3	15953.3	158685	-18.5992
62	F2	9	23246.9	3247.65	10199.7	112516	-1605.55																62	F2	9	72713	8447.74	14020.7	132775	-654.241
63	F3	9	20760.2	3595.47	10751.8	101226	-1416.35																63	F3	9	78744.2	8813.77	14536.5	121267	-499.741
64	F4	9	17299.2	1919.21	12029.9	107724	517.403																64	F4	9	79551.1	19825.4	16679.4	115779	1392.38
65	F5	9	27730.2	3516.01	10513.6	91910.3	-106.071																65	F5	9	54353	5496.37	13298.5	105994	844.145
66	F6	9	25236.1	2929.47	11040.5	94929.1	-561.691																66	F6	9	56734.8	5579.81	14577.5	111269	210.917
67	F7	9	25088.7	3136.43	10842.8	89795.4	-819.428																67	F7	9	671756	66221	14846	106741	3138.45
68	F8	9	29131.5	3684.88	12153.2	99167.8	-870.745																68	F8	9	790668	79430.3	16406.3	118880	187.927
69	F9	9	30982.3	3769.82	10936.9	100757	793.194																69	F9	9	765586	80747.7	15819	121067	2795.78
70	F10	9	510843	57748.1	10153.5	99575.4	-1259.15																70	F10	9	717742	80970.1	14219.6	111989	-351.784
71	F11	9	566148	70259.8	10263.8	103724	241.452																71	F11	9	732013	91151.2	14024	120722	1540.6
72	F12	9	565681	79984.7	9588.04	106613	-2643.02																72	F12	9	733574	103829	13563.2	125733	-1083.76
73	G1	9	36901.5	5454.53	10898.7	132301	-2011.46																73	G1	9	232634	31926.8	16198.3	163438	-324.764
74	G2	9	31873.2	4285.16	10195.2	118300	-1192																74	G2	9	193209	25939.1	15650.2	157123	27.0503
75	G3	9	29241.2	4667.57	10963.2	112969	-1299.19																75	G3	9	185126	23427.2	15726.1	135278	-1.05912
76	G4	9	32323.8	4337.33	11215.1	108939	-1474.56																76	G4	9	111597	24107.3	16501.8	138270	-1000.9
77	G5	9	26696.2	3529.61	10390.3	92809.4	-345.59																77	G5	9	53852	5837.94	13792.1	109780	834.318
78	G6	9	28332.9	4446.02	11257.9	99201.4	-851.804																78	G6	9	73798.7	13130.5	15855.1	112265	2037.61
79	G7	9	28322.8	3791.69	10299.9	92890.1	45.5424																79	G7	9	59869.1	7227.84	13756.7	106205	1282.33
80	G8	9	29719.4	3710.07	10813.1	100506	-1471.83																80	G8	9	65558.1	7371.97	15015.7	116496	327.545
81	G9	9	29873.9	3310.39	10965.9	101002	235.471																81	G9	9	67908.3	8910.72	15597.3	123476	1695.38
82	G10	9	567000	67566.1	10495.8	97629.9	81.734																82	G10	9	75725	8247.26	24785.1	231738	421.771
83	G11	9	553158	72611.8	9363.54	97591	-1089.14																83	G11	9	62810.9	7941.87	13222.3	121042	664.879
84	G12	9	701984	102654	11225.7	121315	-2218.56																84	G12	9	76111.6	16049.9	15467.5	150764	-1723.24
85	H1	9	125452	21075.6	9850.77	127834	-566.793																85	H1	9	78726.6	10351	12500.8	151370	771.042
86	H2	9	119557	18379.9	9510.28	119855	-1110.19																86	H2	9	77872.6	10371	14074	161079	260.655
87	H3	9	104750	14053.1	10099.2	113387	-1931.35																87	H3	9	71324.6	12325.9	13950	132654	-479.89
88	H4	9	30139.3	4852.15	9776.91	110387	-78.7293																88	H4	9	36559.1	3825.98	1206.9	2851.02	2146.29
89	H5	9	37891.5	5616.98	11420.8	109290	-917.868																89	H5	9	43856.3	4925.94	2156.84	3273.46	1397.46
90	H6	9	36240.4	4660.04	12321.3	115975	-908.173																90	H6	9	139370	11205.8	5667.12	5189.9	2961.3
91	H7	9	29983.4	4359.24	11494.3	110227	-1907.53																91	H7	9	30220.4	3000.08	1793.91	2257.81	1313.26
92	H8	9	31648.3	4415.51	11703.1	116498	-852.535																92	H8	9	39136.8	3352.98	1588.1	1916.78	2129.9
93	H9	9	28949.9	4265.85	9816.49	104483	-1192.19																93	H9	9	44044.5	4192.93	2129.46	2656.5	1974.3
94	H10	9	28627.6	3703.9	9099.15	105152	1910.07																94	H10	9	60600.4	7870.89	14181	128410	1959.49
95	H11	9	31964.8	5403.68	8981.95	114987	-1299.04																95	H11	9	64397.4	8965.04	12334.8	138292	-990.285
96	H12	9	32165.2	5678.3	9093.58	118405	-1047.89																96	H12	9	85930.2	17681.2	12785.3	140517	-1104.24
1	A1	10	57831.8	9342.13	9126.35	116222	-1226.76																1	A1	10	784848	127685	13532.8	143414	-443.617
2	A2	10	62157.2	8475.11	9019.78	115172	-317.731																2	A2	10	807764	115572	13667.1	143045	464.158
3	A3	10	63343.6	8132.74	9845.77	112865	-1681.91																3	A3	10	773903	100709	13986	136417	-433.256
4	A4	10	611793	73469.3	11635.9	115127	-140.367																4	A4	10	51598.1	4869.41	13671.1	132509	1073.41
5	A5	10	602647	68507.8	11420.8	109861	-777.1																5	A5	10	58298.6	5308.06	15040.2	131096	595.332
6	A6	10	601796	66182.2	11229.3	108410	-1292.55																6	A6	10	63304.9	4588.69	14919.1	130144	-499.847
7	A7	10	49655.1	6342.24	10972.6	106257	-1239.43																7	A7	10	748086	82664.7	15815.1	132836	-396.759
8	A8	10	50942.4	6454.17	11838.4	113371	-1279.84																8	A8	10	804691	90518.2	16505.5	135964	-419.466
9	A9	10	44627.2	6239.54	10944.3	111096	-3223.67																9	A9	10	769429	91036.5	15426.1	133735	-1409.02
10	A10	10	49355.7	6889.18	9710	109200	-1587.83																10	A10	10	44636.6	4601.59	13492.9	134007	-1034.41
11	A11	10	53678.5	8330.83	8447.74	108330	-2572.51																11	A11	10	50127	5712.28	12531.9	141339	-1121.55
12	A12	10	55240	8596.17	8337.78	115251	-2507.65																12	A12	10	55695.2	6100.4	12095.9	140185	-1467.28
13	B1	10	59846.3	8856.86	9067.55	122057	-2403.61																13	B1	10	70306.6	6555.64	12650.5	146315	-1117.73
14	B2	10	50684.5	6704.84	8772.7	99863.5	-1247.1																14	B2	10	137777	45266.3	16548	134672	-47.6286
15	B3	10	50812.7	6091.11	9763.17	104211	-1374.73																15	B3	10	111864	9893.96	14670.5	123609	-18.06
16	B4	10	567241	62985.3	11414.1	111337	-194.569																16	B4	10	48512.5	4506.93	13589.5	121752	262.275
17	B5	10	558674	58583.4	10652.7	96545.8	528.352																17	B5	10	84166.7	5893.61	13940.3	113924	644.762
18	B6	10	538266	54828.2	10804.2	94643.3	-108.479																18	B6	10	43130.1	4055.02	13903.8	114100	634.462
19	B7	10	119296	12767.9	12966.7	109839	-1649.03																19	B7	10	800821	81863.4	16271.8	121780	-710.12
20	B8	10	122657	12712.5	11003.8	98741	-880.038																20	B8	10	810830	84617.3	15266	120674	131.955
21	B9	10	124718	13442.5	10933.1	105778	-166.023																21	B9	10	829147	91081.7	15606.7	128658	375.4
22	B10	10	46681.5	5893.22	8586.09	88525.7	-1052.51																22	B10	10	660399	80631.2	13804.5	115697	425.056
23	B11	10	38861.6	5155.81	8844.9	102190	-1668.68																23	B11	10	624434	83827.8	12239.3	111393	-437.186
24	B12	10	37869.9	6107.37	7569.1	94027.9	-985.924																24	B12	10	649216	100207	10920.9	113593	-118.105
25	C1	10	53317.5	7505.93	8504.72	102352	-1349.47																25	C1	10	60881.6	6618.63	12132.3	128450	-398.079
26	C2	10	54438.6	7363.16	9489.21	99343.9	908.868																26	C2	10	59467.3	5956.18	13199.6	124543	3940.58
27	C3	10	51403.7	6555.6	9108.14	94548.4	-1394.87																27	C3	10	53272.3	5669.17	12688.4	112339	-409.855
28	C4	10	41981.7	4668.01	10920.6	99779	-55.917																28	C4	10	35512.5	2815.63	1715.93	2115.64	1335.87
29	C5	10	53583.3	5630.23	10727.1	93667.9	192.079																29	C5	10	29645.5	1870.82	1544.48	2086.34	1383.63
30	C6	10	-13472.3	4226.23	10477.6	93212.4	-583.331																30	C6	10	-24465.8	2556.56	1140.95	1815.38	828.168
31	C7	10	49200.5	5257.8	10919.3	91355.7	-955.814																31	C7	10	28210.1	2281.86	1884.47	1846.97	519.877
32	C8	10	44002.5	5252.29	11561.7	96873.8	-1173.98																32	C8	10	32639	2514.62	1797.35	2023.83	425.953
33	C9	10	11775.4	1941.17	9538.95	88516.5	-889.285																33	C9	10	25405.8	2376.36	1081.02	1636.92	-742.595
34	C10	10	14863.2	1846.72	9262.9	92178.2	-952.042																34	C10	10	33331.5	2491.07	1878.83	1751.72	1301.95
35	C11	10	14433.9	2468.73	8227.29	92604	-1249.28																35	C11	10	49998.5	4677.46	2669.52	3517.33	2798.54
36	C12	10	12581.2	2913.23	7107.13	91512.6	-443.202																36	C12	10	37882.8	3378.46	1727.55	2535.05	3165.44
37	D1	10	403040	56615.4	6320.49	75596.2	684.865																37	D1	10	123397	14187.7	11889.7	128001	1520.83
38	D2	10	467024	57988.7	11816.2	119488	716.895																38	D2	10	157372	17991	12606.2	118279	1752.41
39	D3	10	505979	56596.1	10397.5	94380.7	327.344																39	D3	10	133122	14236.8	12362.1	105061	745.749
40	D4	10	13488	1284.37	9601.17	88583.9	-184.076																40	D4	10	44732.3	3767.74	13469.9	109803	617.75
41	D5	10	15458.2	1666.49	9733.2	88564.9	2237.54																41	D5	10	63581.2	14787	14524.7	103877	877.042
42	D6	10	15606.6	1899.82	10218	88364.4	-516.806																42	D6	10	44301.2	5687.77	13877.6	102969	292.445
43	D7	10	12219.6	1500.37	10060.7	86222.7	-1430.87																43	D7	10	37561.3	3256.81	13660.4	104923	-624.559
44	D8	10	15999.1	1667.17	10603.6	88879.3	-461.347																44	D8	10	51265.9	5469.21	14381.7	104672	1997.3
45	D9	10	13181.6	1882.24	10817.8	93881.6	-878.263																45	D9	10	41488.6	3835.76	13472.4	106720	158.319
46	D10	10	23794.5	4476.71	8777.74	88645.8	223.154																46	D10	10	47094	4511.27	13583.4	110713	1217.01
47	D11	10	30404.8	7946.85	10028.8	101934	-1582.59																47	D11	10	47222.2	4512.07	12134.4	116022	-513.235
48	D12	10	14082.4	2200.37	8021.89	95469.4	-1646.97																48	D12	10	41656.4	4535.14	10293	107615	-694.251
49	E1	10	403679	56270.4	9324.91	115611	280.582																49	E1	10	791983	110494	13732.6	141749	1229.89
50	E2	10	399777	49083.9	9857.01	109141	-164.259																50	E2	10	768909	94741.9	14488.9	127693	2449.73
51	E3	10	509310	55890.4	10630.7	102310	1232.07																51	E3	10	708315	78380	14406.2	117744	1968.71
52	E4	10	85377.1	8648.85	10094.6	90787.1	9.77283																52	E4	10	61551.8	6800.25	13372.5	104602	314.177
53	E5	10	69821.2	7485.31	9919.78	85036.9	73.2305																53	E5	10	46718.3	7689.53	13071.2	96136.1	601.299
54	E6	10	74884.3	7747.32	9907.23	83915.2	-284.767																54	E6	10	43131	4818.67	13248.9	99374	349.851
55	E7	10	17006.5	1512.7	10191.5	87715.1	754.613																55	E7	10	616001	60851.4	14643	104875	1531.49
56	E8	10	112379	19147.1	10608.5	85651.2	-582.013																56	E8	10	586502	58550.7	13887.8	100209	-44.3008
57	E9	10	15008.6	2034.82	9868.03	92299.3	-432.806																57	E9	10	627749	65160	14137.4	110745	414.961
58	E10	10	17107.4	2235.91	9563.08	92297.9	-241.245																58	E10	10	51954	6192.05	12540.7	106404	250.685
59	E11	10	17754.9	2568.03	9915.96	102491	-253.205																59	E11	10	65488	8059.86	13312	116528	762.417
60	E12	10	15571.4	2355.37	7991.27	97832.8	-1195.81																60	E12	10	80171.4	12733.4	11288.6	117288	-216.716
61	F1	10	22637.4	3872.31	10401.3	126833	-1605.18																61	F1	10	90103.1	11577.2	16049.9	158467	-16.1744
62	F2	10	21790.8	3583.97	10123.8	112226	-1653.76																62	F2	10	73854.2	8278.08	13925.5	132216	-573.06
63	F3	10	20436.5	3892.25	10753.7	101224	-1697.48																63	F3	10	79137.2	9171.81	14247.4	121456	-398.411
64	F4	10	17678.5	2006.4	12147.2	107957	547.27																64	F4	10	79407.3	20489.4	16224.4	115571	1557
65	F5	10	27134.2	3376.09	10208.2	91958.9	-140.487																65	F5	10	53251.9	5748.37	13367.6	106061	484.811
66	F6	10	24920.9	2700.72	10958.9	95106.5	-561.707																66	F6	10	56383.5	5555.58	14365.6	111232	280.567
67	F7	10	25806	3230.16	10744.7	90062.5	-911.55																67	F7	10	671053	66173.6	14994	106517	3206.32
68	F8	10	28858	3908.16	12192.4	98987.6	-740.21																68	F8	10	790643	79222.3	16062.8	118777	157.827
69	F9	10	31059.3	3530.4	11540.4	100891	943.683																69	F9	10	763802	80211.4	15603.9	120928	2788.87
70	F10	10	511578	57873.2	10365.7	99632.3	-952.548																70	F10	10	715694	81090.3	14097.3	112004	-427.51
71	F11	10	566967	70481	10621.3	103297	210.699																71	F11	10	732195	91191.1	14069.1	120920	1128.62
72	F12	10	565364	80328.4	10050.5	106429	-2223.68																72	F12	10	732582	103801	13328.1	125313	-948.004
73	G1	10	36397.9	5306.68	10954.3	131933	-1583.12																73	G1	10	232757	31750.3	15298.2	162785	-8.17969
74	G2	10	31984.1	4323.9	9779.12	119144	-1040.89																74	G2	10	192627	25439.7	15998.7	156902	-50.7373
75	G3	10	28663.9	4185.17	10887.3	113524	-1317.39																75	G3	10	185043	22811.6	15710.3	135562	39.5593
76	G4	10	32484.4	4495.55	10898.4	109452	-1885.55																76	G4	10	112749	23703.5	16881.5	138517	-1136.82
77	G5	10	26357.5	3546.14	10449	92910.1	-337.545																77	G5	10	53762.9	5763.09	13863	109594	683.492
78	G6	10	27785.7	4315.55	11417.6	99390	-781.756																78	G6	10	72650.4	12839	16187.9	112292	2195.34
79	G7	10	28134.3	3834.59	10476.4	92652.5	59.4198																79	G7	10	59937	6505.74	13490.3	106236	1092.58
80	G8	10	29044.7	3923.9	11040.7	100709	-1539.09																80	G8	10	66013.2	7241.63	14997.5	116549	610.955
81	G9	10	29148.2	3638.05	11177.2	101133	130.371																81	G9	10	68258.6	8707.6	15443.5	123605	1826.78
82	G10	10	565543	67695.7	10674.6	98324.8	-212.331																82	G10	10	75167.7	8001.89	25075.8	231968	645.028
83	G11	10	552772	72194.1	9444.76	98019.3	-1261.13																83	G11	10	64272.9	7630.04	13125.6	121104	397.92
84	G12	10	702866	103039	10969.3	122135	-2773.83																84	G12	10	75898.3	15178.2	15333.9	150407	-1679.81
85	H1	10	127175	21328.9	9724.12	128656	-1025.71																85	H1	10	78266.9	10767.9	12852.5	150718	387.508
86	H2	10	120686	18646.7	9566.31	119963	-1291.13																86	H2	10	77686.1	9830.52	13907.7	160482	42.1457
87	H3	10	105369	14031.1	9633.16	113709	-1337.18																87	H3	10	71168.3	12172.4	13750.2	132244	-417.925
88	H4	10	30204.3	4483.57	9558.66	110415	73.1518																88	H4	10	36394.9	3768.25	748.124	2672.5	1765.7
89	H5	10	38378.4	5598.15	11219.9	109684	-1029.24																89	H5	10	44833	4862.87	2449.62	3740.15	1186.93
90	H6	10	36075.8	4821.62	12032.1	116707	-1280.17																90	H6	10	138951	11300.2	5705.58	5505.26	3091.63
91	H7	10	29851.4	4507.27	11463.6	110258	-1923.45																91	H7	10	30903.7	2943.08	2280.81	2488.34	1147.15
92	H8	10	31730.3	4165.08	12167.5	116879	-671.545																92	H8	10	39123.1	2903.11	1754.03	2553.1	2767.44
93	H9	10	29418.2	4142.61	9799.99	105379	-854.996																93	H9	10	44056.1	3905.44	1749.61	2213.43	2097.01
94	H10	10	28100.5	3946.89	9156.33	105187	1773.35																94	H10	10	60023.8	7623.31	14612.9	129008	2096.73
95	H11	10	31085.1	5158.13	9062.78	115290	-1168																95	H11	10	64055	8994.17	12024.5	139127	-323.68
96	H12	10	32770.3	5954.33	9033.4	119325	-1167.8																96	H12	10	86694.9	17977.5	13159.2	141145	-314.437
1	A1	11	58421.6	9740.55	8905.31	115855	-945.501																1	A1	11	782122	126455	12871.2	142995	-613.822
2	A2	11	62658.3	8735.97	9025.71	114654	-666.165																2	A2	11	808344	115369	13396.7	143189	-0.52832
3	A3	11	63564.2	8351.11	9975.94	112804	-1603.19																3	A3	11	773784	100369	14436	136513	-377.713
4	A4	11	611483	73352.7	11493.4	114538	-474.96																4	A4	11	52256.7	4557.15	14099.6	132142	699.457
5	A5	11	602143	68810.9	11823.6	109935	-857.25																5	A5	11	58360.6	4832.39	14873.1	130766	99.5118
6	A6	11	602102	66044.5	11616.7	107661	-1184.12																6	A6	11	62659	4694.66	15130.9	130408	-421.636
7	A7	11	49549.6	6669.27	10848.7	106244	-1308.63																7	A7	11	747154	82778	15370.1	131985	-854.117
8	A8	11	51580.8	7063.87	12228.4	112939	-1682.47																8	A8	11	805814	91276.9	17118	136057	-800.286
9	A9	11	44513.7	6134.12	11126.1	111214	-2933.33																9	A9	11	771551	91288.9	15675.4	133554	-1684.21
10	A10	11	50236.4	6902.52	9998.78	108975	-1396.46																10	A10	11	44277.7	4401.42	12960.5	133750	-974.906
11	A11	11	54234.8	8578.38	9003.63	108370	-1729.41																11	A11	11	50685.7	5925.65	12692.1	141177	-850.944
12	A12	11	56118.7	9537.09	8498.79	115710	-1667.28																12	A12	11	55751.9	6081.17	11798.3	139393	-1480.03
13	B1	11	60102.9	9094.1	9304.83	122371	-2431.04																13	B1	11	70649.1	6222.12	13110.1	145615	-1251.31
14	B2	11	50756.4	7148.61	8595.99	99744.6	-1999.89																14	B2	11	139383	45413.9	16986.9	134772	-249.944
15	B3	11	51463.4	5986.73	9645.54	104027	-1470.12																15	B3	11	111739	10157.8	14787	123758	254.196
16	B4	11	566150	63162.6	11887.5	111527	-247.709																16	B4	11	48205.4	4481.16	13732.9	121914	368.723
17	B5	11	556401	58521.6	10823.9	96455.2	280.779																17	B5	11	84368	5516.67	14253.6	113712	755.949
18	B6	11	537754	54687.1	11132.9	94660.4	-389.705																18	B6	11	44364.5	3732.23	13614.2	114072	653.233
19	B7	11	118178	13207	13373.3	109533	-1575.86																19	B7	11	800141	81892.8	16535.4	122068	-1129.37
20	B8	11	123095	12738.5	11469.4	98654.8	-466.522																20	B8	11	811387	84477.7	15449.9	120855	-205.071
21	B9	11	125662	13951.4	11363.1	106416	-230.282																21	B9	11	828433	90619.5	15584.3	128795	296.124
22	B10	11	46300.8	5822.08	8679.32	88662.8	-1313.49																22	B10	11	661924	80853.5	14087.4	115412	601.738
23	B11	11	38947.3	5322.41	9046.65	102288	-1674.12																23	B11	11	625341	83579.5	12101.8	111381	-577.233
24	B12	11	36727.6	6461.37	7467.56	93630.5	-765.658																24	B12	11	649425	99606.8	10953.5	113587	-277.514
25	C1	11	52716.7	8119.01	8290.98	102480	-1413.37																25	C1	11	61037	6479.41	12497.3	128357	-480.241
26	C2	11	54168.9	7831.49	9411.56	99328.4	737.003																26	C2	11	59681.1	6155.08	13476.4	124918	3842.8
27	C3	11	51477.4	6574.85	9097.25	94166.7	-1581.08																27	C3	11	52513.9	5435.54	12955.9	112030	-316.739
28	C4	11	40699.8	4817.12	10987.9	100042	-250.747																28	C4	11	35263.6	2788.26	1845.29	2070.64	1479.04
29	C5	11	53879.8	5561.44	10317.9	93785.7	228.649																29	C5	11	29736.3	1843.32	1405.63	2274.87	831.73
30	C6	11	-13594.4	4084.49	10252.4	93459.1	-1030.03																30	C6	11	-25296.3	2281.39	1175.09	1790.73	899.802
31	C7	11	48270.8	5178.9	10971.1	91512.4	-1099.31																31	C7	11	27841.4	2148.42	1907	1872.3	221.999
32	C8	11	44467.8	5520.3	11375.6	96649.3	-1061.98																32	C8	11	31925.8	2574.03	1982.99	2085.64	516.895
33	C9	11	11711.4	1856.26	9470.4	88926.1	-1041.27																33	C9	11	25208.2	2215.48	1168.38	1756.59	-754.542
34	C10	11	13418.7	1874.51	9224.01	92072	-1497.55																34	C10	11	32463.5	2263.77	1463	1725.74	1229.23
35	C11	11	13845.3	2254	8446.78	92878.9	-1144.29																35	C11	11	49436.2	4348.22	2625.51	3593.61	2779.98
36	C12	11	12735	2732.13	7066.63	91504.3	-659.489																36	C12	11	38090.2	3573.61	1509.46	2812.1	2948.09
37	D1	11	404279	56631.1	6716.46	75833.8	805.736																37	D1	11	124138	14451.5	11990.6	127915	1634.86
38	D2	11	468262	58681.6	12019.8	119797	459.636																38	D2	11	157501	18122.6	12818.3	118400	2020.96
39	D3	11	505909	56218.7	10522.4	94331.4	115.081																39	D3	11	134677	14106.1	12538.6	105080	589.706
40	D4	11	13211.1	1370.91	10024.7	88865.3	-224.448																40	D4	11	45363.5	3688.87	13674.9	109836	716.805
41	D5	11	15070.3	1581.55	10332.7	88445	2258.32																41	D5	11	63106.9	14980.5	14552.3	103846	754.588
42	D6	11	15840.2	1560.95	10664.4	88462.5	-189.978																42	D6	11	43666.9	5742.35	13936.2	103203	47.2262
43	D7	11	12288.2	1311.81	10205.4	86348.1	-1149.11																43	D7	11	38379.5	3453.42	13778.4	104458	-546.007
44	D8	11	16316	1509.3	10572.5	88572.8	-593.918																44	D8	11	51214.4	5306.64	14082.9	104695	2161.59
45	D9	11	12650.9	1623.2	11067.2	93692.4	-579.661																45	D9	11	40929.5	3990.62	13608.5	106406	-139.591
46	D10	11	24321.6	4687.07	9103.89	88495	66.242																46	D10	11	47260.4	4450.74	13817.1	110531	1032.31
47	D11	11	31633.8	7911.87	9991.41	102371	-1507.87																47	D11	11	47572.8	4544.26	12170.5	116125	-985.648
48	D12	11	13691.4	1954.68	8304.62	95276.3	-1315.34																48	D12	11	41892.8	4789.7	10406.7	107866	-963.899
49	E1	11	404094	56614.2	10119.2	115726	162.488																49	E1	11	789923	110591	13579	141928	908.78
50	E2	11	398433	49580.3	10487	108827	-298.378																50	E2	11	769458	94597.7	14444.3	127418	2542.95
51	E3	11	510284	56156.8	10571.5	102732	779.427																51	E3	11	708006	78129.3	13842.2	117692	1892.59
52	E4	11	86094.2	8940.54	10364.4	90949	-548.676																52	E4	11	60511.2	6437.89	13372.3	104388	633.654
53	E5	11	69431.4	7343.21	10000.9	84677.3	-62.5229																53	E5	11	47436.2	8223.26	13000.7	95879.7	814.287
54	E6	11	75195	7759.53	10123.5	83878.1	-511.334																54	E6	11	42355.2	4718.37	13090.6	99215.4	593.965
55	E7	11	18025.8	2051.82	10380.6	87722.1	672.099																55	E7	11	615515	60743.7	14207.9	104695	1274.96
56	E8	11	113959	19534.1	10907.9	85567.1	-832.156																56	E8	11	587448	58598.8	13183.5	100234	253.598
57	E9	11	14407.7	1498.75	10051.6	92298.4	-463.67																57	E9	11	628921	64707.5	14076.9	110575	387.247
58	E10	11	17043.1	2470.44	9678.56	92269.7	-436.016																58	E10	11	51270.3	6062.83	12294.6	106046	277.743
59	E11	11	17293.1	2333.07	10412.7	102642	-387.585																59	E11	11	65166.5	7902.46	13332.8	116179	1110.35
60	E12	11	15833.8	2763.33	8012.34	97173.2	-864.647																60	E12	11	82384.3	12471.2	11134.9	117144	60.1622
61	F1	11	21739	4021.52	10347.5	126966	-962.368																61	F1	11	91306	11785.2	15776.9	158032	599.343
62	F2	11	21970.8	3881.11	9882.96	112062	-1560.7																62	F2	11	73437.5	8820.02	13857.8	132369	-607.457
63	F3	11	20226.6	3876.44	10406.9	101036	-1498.91																63	F3	11	79622.5	9026.6	14509.3	120767	-470.093
64	F4	11	17758.5	1981.42	11899.1	107742	451.203																64	F4	11	67283.2	12041.6	15381.3	115077	1384.04
65	F5	11	27354.6	3138	10208.8	92314.8	-226.813																65	F5	11	53159.5	5497.72	13585.5	105434	804.786
66	F6	11	24741.7	2861.23	10972.6	94977.4	-439.958																66	F6	11	57160	5557.17	14504.9	111192	215.685
67	F7	11	25185.9	3162.16	10834.2	89673.4	-429.531																67	F7	11	671107	66151.6	14596.8	106620	3344.09
68	F8	11	28217.9	3361.19	12207.9	99164.9	-656.72																68	F8	11	789595	78948.7	16298.1	119035	-123.125
69	F9	11	31591.3	3830.39	11421.6	100545	776.717																69	F9	11	763261	80322.3	15915.7	121020	2504.12
70	F10	11	512855	58511	10067	99711.2	-1225.15																70	F10	11	716121	81214.7	14284	111614	-406.044
71	F11	11	566576	70446.8	10291.9	103408	320.206																71	F11	11	731988	91985.1	13413.8	120195	1458.47
72	F12	11	566327	80715.9	9418.45	106732	-2000.36																72	F12	11	734931	104514	13108	125289	-1128.91
73	G1	11	39142.1	4789.16	10597	132674	-1949.45																73	G1	11	231802	31089.9	15749.6	163614	32.5084
74	G2	11	32268	4440.71	9644.12	119034	-1604.26																74	G2	11	191872	25982.6	16179.1	157002	357.889
75	G3	11	29071.3	3979.21	11029.6	113769	-1533.93																75	G3	11	186454	22804.2	15770.5	135055	-312.477
76	G4	11	32494.4	4669.65	10842	109583	-2234.73																76	G4	11	113275	24401.8	17032.4	138910	-1129.55
77	G5	11	26784.8	3124.86	9897.48	92593.8	-605.427																77	G5	11	54629	6143.39	13877.4	109621	770.221
78	G6	11	27024.6	4484.65	11238	99238.9	-883.46																78	G6	11	72795	13034.2	15671.2	112204	2195.56
79	G7	11	27956.6	3935.87	10519.8	92963	56.6233																79	G7	11	60227.1	6487.57	13590.2	106391	1448.98
80	G8	11	29622.2	3698.38	11019.3	100795	-1542.71																80	G8	11	66023.5	7149.68	14782.7	116203	145.946
81	G9	11	29140.1	3598.33	10625.5	101389	-172.981																81	G9	11	68329	9013.64	15828.7	123623	1785.82
82	G10	11	566124	67088.8	10408.1	98453.8	-400.537																82	G10	11	75916.7	8065.4	24787.7	232094	702.716
83	G11	11	553222	72418.1	9216.32	97760.4	-1431.01																83	G11	11	63475.2	7689.06	12958.1	121112	698.505
84	G12	11	702233	103394	10984.5	121417	-2277.82																84	G12	11	74774	15316.5	15849.9	149633	-1668.72
85	H1	11	127166	20875.5	9636.24	128211	-301.225																85	H1	11	77371.2	10750.6	12511.4	150487	438.848
86	H2	11	120450	17653.5	9161.5	120075	-1345.81																86	H2	11	76819.1	10576	14053.4	160810	112.694
87	H3	11	105653	13612.9	9630.98	114149	-1551.43																87	H3	11	70454.8	12702.3	13552.4	132461	-519.772
88	H4	11	29993.9	4746.98	9929.45	110889	-131.186																88	H4	11	36303.8	3711.09	919.518	2464.4	1523.87
89	H5	11	38111.3	5795.97	11559.9	109537	-1225.26																89	H5	11	44180.1	5063.81	2261.51	3641.26	1119.62
90	H6	11	35878.1	4640.63	12066.9	116587	-871.04																90	H6	11	139240	11661.2	5876.15	5534.69	2818.06
91	H7	11	30074	4354.2	12014.5	110324	-2082.43																91	H7	11	30877.7	2923.11	2021.6	2204.09	1396.3
92	H8	11	31965.6	4551.71	12102.7	116987	-688.45																92	H8	11	38275.2	3351.44	1852.83	2265.97	2750.33
93	H9	11	29696	4290.43	9745.76	104607	-868.518																93	H9	11	44713.5	4242.43	2347.77	2706.95	1948.82
94	H10	11	28196	4207.51	9158.98	105093	1952.03																94	H10	11	59874.2	7833.93	14880.3	128493	2039.34
95	H11	11	31968.9	5428.58	9195.03	114904	-1408.15																95	H11	11	64937.8	9345.61	12315.1	139406	-1057.17
96	H12	11	31817.4	6260.26	9373.05	118541	-1284.68																96	H12	11	87497.4	17641.7	13016.4	140676	-526.703
1	A1	12	59097.3	8966.33	9000.01	116420	-1010.03																1	A1	12	780646	126497	12886.9	142600	165.359
2	A2	12	62829.5	8688.72	8967.8	115028	-797.791																2	A2	12	807423	115771	13154.7	142771	343.061
3	A3	12	63271.3	7914.51	10514.4	112913	-1649.81																3	A3	12	773103	100327	14287.8	136305	-104.919
4	A4	12	611230	73084.4	11343.8	114418	144.96																4	A4	12	50312.1	4805.96	13993.2	132608	957.087
5	A5	12	602797	68508.7	12135.9	110053	-755.302																5	A5	12	57814.4	5283.87	15134	130598	516.534
6	A6	12	601936	65791.7	12065.8	108311	-1427.45																6	A6	12	62751.1	4833.24	14891	129703	-488.741
7	A7	12	49451.2	6786.7	11163.6	105836	-1249.67																7	A7	12	747816	82875	15888.1	132652	-729.984
8	A8	12	52013	6629.81	12159.7	113572	-1426.34																8	A8	12	806049	91121.3	16652.3	135958	-653.477
9	A9	12	45045.8	6153.5	10973.6	111482	-2997.09																9	A9	12	771400	91814.7	15753.9	133406	-1576.64
10	A10	12	49242.9	6291.9	9706.84	109337	-1529.37																10	A10	12	43776.8	5055.43	12991.5	133380	-1011.86
11	A11	12	53746.7	8304.46	8886.51	108716	-2027.7																11	A11	12	50067.3	5516.03	12317.2	141282	-1257.24
12	A12	12	55488.3	9127.17	8645.13	115983	-1975.6																12	A12	12	54751.5	6414.28	11486.6	139525	-1258.13
13	B1	12	60757.9	8893.04	9578.44	121689	-1850.31																13	B1	12	71418.8	6647.47	13198.4	145677	-1245.08
14	B2	12	51206.5	7281.03	8848.08	99377.8	-1222.88																14	B2	12	140010	46423.2	17022	134889	28.1805
15	B3	12	51429.2	5935.48	9753.06	103836	-1440.77																15	B3	12	111621	9743.9	14204.5	123802	-85.7041
16	B4	12	566108	62991.5	11452.3	110889	-309.12																16	B4	12	48076.3	4457.87	13553.3	121465	437.691
17	B5	12	556435	58366.4	10914.7	96557.9	669.089																17	B5	12	83952.7	5288.96	14166.3	113502	909.926
18	B6	12	537497	54701.1	11107.2	94221.4	-243.686																18	B6	12	43109.2	4020.35	13875.2	113643	334.555
19	B7	12	118678	13269.8	13075.7	109556	-1949.78																19	B7	12	800449	81996.9	16273.2	121842	-805.818
20	B8	12	123504	12775.9	11095.1	98476.4	-658.607																20	B8	12	809959	84232.1	15089.5	120510	4.32018
21	B9	12	126285	13948.8	11648.5	106049	-371.461																21	B9	12	827358	90624.2	15171.1	128996	282.422
22	B10	12	46009.1	6145.86	8699.28	88688	-1088.27																22	B10	12	661643	80549	13725.7	115755	615.411
23	B11	12	39130.1	5178.72	9005.1	102154	-1555.43																23	B11	12	625067	83922.7	12421.1	111075	-502.08
24	B12	12	36856.1	5914.03	7576.44	93797.9	-1100.31																24	B12	12	647799	99594.4	10706.9	113495	-196.138
25	C1	12	53320	7907.16	8650.99	102331	-964.819																25	C1	12	61154.4	5686.62	12273.3	128803	-434.215
26	C2	12	53693.1	7350.42	9232.44	99253.3	549.603																26	C2	12	59760.6	6026.34	14066.9	124974	3763.08
27	C3	12	50525.3	6445.09	8921.26	94037.7	-1435.46																27	C3	12	52681.2	5431.94	13137.7	111694	-295.41
28	C4	12	40998.9	4642.18	10600.1	99673.1	-205.547																28	C4	12	35356.4	2452.8	2003.14	2406.81	1677.71
29	C5	12	53535.1	5518.33	10326.6	93932.4	100.087																29	C5	12	30321.3	1786.7	1547.83	2300.75	1159.1
30	C6	12	-14377.6	4089.24	10654.7	93103.9	-446.879																30	C6	12	-25305	2414.61	1101.32	1921.4	1124.38
31	C7	12	48789	5339.4	11283.4	91335.8	-1095.14																31	C7	12	27844.7	2138.76	2192.95	2144.29	213.207
32	C8	12	43765.4	5511.68	11421.7	96715.1	-1064.18																32	C8	12	32173.3	2437.01	1767.98	2092.95	586.047
33	C9	12	11063.1	1838.15	9531.25	88714	-1248.61																33	C9	12	25418.7	2051.69	1425.82	1932.57	-463.933
34	C10	12	13688.6	1548.44	9312.25	91732.6	-1128.46																34	C10	12	33171	2203.94	1448.1	2283.09	1295.7
35	C11	12	13333	2113.21	8194.69	92610.1	-1282.15																35	C11	12	50170	3956.47	2717.46	3928.58	2674.47
36	C12	12	11308.4	2616.77	7256.52	91333.1	-421.827																36	C12	12	37970.5	3471.22	1804.61	3297.07	3087.75
37	D1	12	405960	57475.2	6291.67	75575.4	329.143																37	D1	12	123415	14608.9	11784	127833	1687.78
38	D2	12	469423	58593.8	11730.6	119909	483.786																38	D2	12	158130	18257	13253.6	118482	1990.17
39	D3	12	505629	56338.3	10425.9	94704.1	-109.913																39	D3	12	134592	14105	12261.7	104764	677.104
40	D4	12	14029.3	1358.41	10157.4	88879	-203.472																40	D4	12	45538	3446.04	13569.6	109823	265.33
41	D5	12	15520	1495.61	9907.41	88129.8	2024.55																41	D5	12	63478.9	14992.8	14999	103758	714.862
42	D6	12	15838.3	1827.23	10564.8	88208.9	-359.832																42	D6	12	43162	5604.15	13924.7	103326	31.8861
43	D7	12	12506.4	1534.43	10100.1	86062.4	-1460.48																43	D7	12	37788.2	3404.43	13762.9	104384	-581.433
44	D8	12	16270.2	1411.62	10462.5	88352.3	-876.921																44	D8	12	51034.2	5552.76	14317.2	104662	2311.26
45	D9	12	13469.4	1537.53	10982.2	93891.1	-796.943																45	D9	12	40877.6	3976.18	13372	106654	-242.961
46	D10	12	24302.5	4732.77	8834.14	88407	218.616																46	D10	12	47507.2	4541.33	13832.1	110139	1280.55
47	D11	12	31801.4	8092.46	9999.79	102164	-1652.6																47	D11	12	47717.6	4362.94	12411.7	115931	-869.538
48	D12	12	13898.6	2061.5	8014.23	95503.2	-1779.21																48	D12	12	41953	4076.97	10156.2	108252	-698.084
49	E1	12	406761	56677.2	9225.87	116133	190.693																49	E1	12	788170	110382	14083.6	141534	1226.11
50	E2	12	402361	49942.5	9752.29	109192	-83.5944																50	E2	12	770072	94890	14367.1	127365	2400.51
51	E3	12	509060	55708.6	10347.1	102469	905.011																51	E3	12	708217	78438	14180.2	117634	1955.36
52	E4	12	86368.8	8838.63	10349.6	90891.3	-102.357																52	E4	12	61149.2	6768.48	13208.4	104410	387.17
53	E5	12	69950.2	7362.58	9868.94	85173.4	360.228																53	E5	12	47355.6	8074.55	12964.3	96097.9	632.203
54	E6	12	75377.1	7736.51	9910.78	83866.7	-454.269																54	E6	12	42420.8	4807.23	13123.8	99172.6	353.047
55	E7	12	17552	2103.87	10090.2	87768.7	482.011																55	E7	12	615524	60918.5	14333.1	104748	1248.51
56	E8	12	116341	19750.2	10592.9	85679.4	-664.974																56	E8	12	587949	58553.1	13464.1	99987.2	114.025
57	E9	12	15160.9	1800.52	9942.27	92584.6	-214.769																57	E9	12	629296	65151.5	14012.2	110868	400.583
58	E10	12	16997.2	2563.4	9254.63	92509.6	-465.235																58	E10	12	51559.1	6100.75	12189	106581	176.895
59	E11	12	17017.7	2544.41	9743.29	102382	70.2026																59	E11	12	66206	7846.95	13409.7	115801	813.675
60	E12	12	15315.2	2678.18	7907.44	97716.7	-979.836																60	E12	12	80885.7	13178.7	10928.8	117910	-180.746
61	F1	12	22447.5	3538.24	10442	127190	-737.785																61	F1	12	92528.2	11862.5	16215.8	158105	-136.045
62	F2	12	22010.9	3904.6	10396.8	112176	-1518.72																62	F2	12	73406.5	8192.16	13596.7	132348	-572.502
63	F3	12	20423.8	3805.16	10493.6	101234	-1230.89																63	F3	12	79963.8	8796.37	14656.9	121014	-671.015
64	F4	12	17610.2	1596.08	12069	108190	495.304																64	F4	12	68415.2	11990.2	15491.8	115369	1265.51
65	F5	12	28046.9	3395.42	10110.5	91933.6	-331.748																65	F5	12	53429	5570.31	13272.3	105538	845.065
66	F6	12	25059.2	2824.76	10865.1	95114.1	-318.586																66	F6	12	56138.8	5321.56	14485.2	110919	165.312
67	F7	12	26006.3	3137.62	10631.8	89949.1	-524.002																67	F7	12	671113	66119.6	14983.1	106573	3095.27
68	F8	12	29107.8	3544.32	12363.6	98832.4	-635.252																68	F8	12	788696	78744	15968.5	118622	193.214
69	F9	12	30399	3636.79	10720	100876	639.319																69	F9	12	760490	80143.3	15883.1	121102	2565.92
70	F10	12	514674	58469.1	10401.4	99624.9	-869.324																70	F10	12	715786	81121.5	14016.8	111668	-311.974
71	F11	12	568166	70656	10346.1	103435	406.722																71	F11	12	733293	91506	14111.6	120419	1270.48
72	F12	12	566040	80169.1	9744.08	106574	-2359.93																72	F12	12	733230	104070	13552.5	125457	-950.765
73	G1	12	37151.7	5007.22	10674.4	131675	-2225.79																73	G1	12	234573	31816.6	15096.9	162685	-179.971
74	G2	12	31252.2	3701.75	9723	118111	-1445.99																74	G2	12	191503	25951.2	16200.6	156843	455.467
75	G3	12	29465.4	4174.42	11377.5	112872	-1419.19																75	G3	12	186525	23169.4	15638.7	135988	83.1385
76	G4	12	32511.8	4538.77	11083.6	109245	-1959.45																76	G4	12	113624	24528.6	16885.1	139837	-862.549
77	G5	12	26092.8	3216.81	10325.2	92306.1	-636.545																77	G5	12	54425.9	5636.74	13869.4	109730	730.194
78	G6	12	27354.1	4679.73	11480.9	99110.8	-1406.93																78	G6	12	71998.3	12799.2	15674.6	112270	2036.53
79	G7	12	28188.9	3439.96	10947.4	92941.5	-68.9749																79	G7	12	60696.9	6988.24	13724.2	106342	1084.45
80	G8	12	30183	3689.6	11168.2	100357	-1619.95																80	G8	12	66681.8	7506.62	14913.1	116710	298.418
81	G9	12	28641.4	3369.55	11131.8	100760	329.916																81	G9	12	68851.6	9021.2	15715	124296	1869.81
82	G10	12	565268	67629.7	10650.1	98071.5	171.323																82	G10	12	76154.1	8604.17	25012.4	231917	840.564
83	G11	12	552483	72157.3	9450.9	97571.2	-845.909																83	G11	12	63777.8	7648.33	12923.5	121113	658.388
84	G12	12	702831	103267	11313.4	121068	-3042.42																84	G12	12	74029.3	14368.8	15309.4	150531	-1799.99
85	H1	12	127168	21136.5	9445.71	128163	-680.531																85	H1	12	78292.1	10886.1	12101.7	150282	724.819
86	H2	12	122780	17684.6	9262	119490	-1373.37																86	H2	12	77089.7	9901.17	14138.9	160311	-349.176
87	H3	12	105453	13698.4	9851.95	113756	-1450.46																87	H3	12	70999.5	12201.4	13942.7	131849	-257.143
88	H4	12	30056.7	4925.14	9996.42	110749	-260.376																88	H4	12	37136.2	3617.98	1412.66	2482.68	1600.69
89	H5	12	38947.3	5926.02	11837.4	109655	-805.115																89	H5	12	44726.9	4773.49	3045.78	3230.1	1630.15
90	H6	12	36446.4	5006.06	11752.1	116179	-1183.24																90	H6	12	138521	11592.1	6137.11	5403.09	3276.94
91	H7	12	30423.4	4241.51	11772.1	110477	-2112.5																91	H7	12	30883	2746.91	2034.71	2336.33	1155.47
92	H8	12	32799.7	4486.01	12148.1	117148	-1067.88																92	H8	12	38258.7	3174.23	1904.53	2196.84	2345.93
93	H9	12	29867.5	4112.78	10033.2	105013	-986.393																93	H9	12	43876.6	3864.73	2343.73	2468.5	2089.15
94	H10	12	29204.3	4099.17	9433.88	105166	1460.78																94	H10	12	61325.3	7730.95	14912.2	128454	2171.14
95	H11	12	32401.4	5478.05	8876.34	115025	-1380.73																95	H11	12	64431.7	8675.18	12697.8	138594	-647.29
96	H12	12	34105.5	6072.56	8725.73	118809	-1160.96																96	H12	12	86485.8	17534.3	13540.3	140748	-775.132
1	A1	13	58255.9	8559.75	8905.64	116184	-846.264																1	A1	13	779607	126756	12871.9	142361	-142.039
2	A2	13	61940.9	8389.17	8822.24	115140	-340.503																2	A2	13	807932	115654	13632.3	143511	317.673
3	A3	13	62189.8	8014.6	10237.2	112611	-1931.82																3	A3	13	775008	100818	14360.1	136113	-354.674
4	A4	13	611207	73658.6	11753.6	115111	71.3637																4	A4	13	51133.4	4707.19	13679.3	132292	624.041
5	A5	13	602751	68898.6	12255.3	109852	-989.488																5	A5	13	58036.2	5371.55	15120.1	130627	323.132
6	A6	13	602591	66501.7	11553.4	108249	-1343.94																6	A6	13	62968	4623.83	14654.5	129933	-514.92
7	A7	13	48875.6	6550.53	10902.6	106565	-951.945																7	A7	13	746810	83051.8	15716.9	132774	-410.613
8	A8	13	50884.4	6341.14	12412	113134	-1180.96																8	A8	13	805258	91174	16616.2	136174	-568.893
9	A9	13	43559	6261.79	10697.8	111463	-2949.47																9	A9	13	772519	91738.4	15521.6	133338	-1697.46
10	A10	13	49498.2	6844.72	9934.1	109367	-2109.07																10	A10	13	44711.1	4931.89	13066.5	133870	-1460.31
11	A11	13	53459.2	8411.12	8755.11	108596	-2355.46																11	A11	13	49281.9	5717.14	12777.6	141336	-1136.65
12	A12	13	55946.2	8898.9	8709.58	115486	-1757.67																12	A12	13	55591.5	6578.02	11374.6	139227	-1543.34
13	B1	13	59085	8786.13	10085.3	122111	-2112.38																13	B1	13	69602.5	7113.2	12601.8	145808	-919.107
14	B2	13	50033.1	7131.22	8738.3	99589.6	-1795.52																14	B2	13	139774	47131.3	16771.5	134462	-205.369
15	B3	13	51431.5	6177.8	10190.3	104005	-1288.8																15	B3	13	111549	9765.13	14650.7	123681	57.665
16	B4	13	566259	63183.8	11936.2	111422	-271.798																16	B4	13	48863.6	4465.35	13589.1	121311	216.129
17	B5	13	555980	58323.6	11140.6	96740.2	268.262																17	B5	13	83880.4	5332.3	14338.6	113699	886.914
18	B6	13	535455	54779.5	11052.1	94707.8	-255.155																18	B6	13	43298.6	3631.71	13926.1	113952	778.312
19	B7	13	118897	12963.6	13137.3	109451	-1301.83																19	B7	13	798816	81815.2	16322.8	121723	-500.418
20	B8	13	123569	12811.4	11061.3	98738.9	-722.366																20	B8	13	807622	84281.8	15357.7	121168	-69.2125
21	B9	13	126846	14093.5	11202.2	105999	-316.555																21	B9	13	826377	90864.2	15594.9	128764	79.5783
22	B10	13	45513.1	5977.14	8567.86	88892.2	-632.515																22	B10	13	660989	80956.9	14127.5	115792	555.567
23	B11	13	39159.3	5246.1	9157.87	102227	-1620.61																23	B11	13	626080	84055.6	12366.2	111022	-366.787
24	B12	13	37370.3	6291.87	7454.04	94395.4	-917.822																24	B12	13	647476	99711.9	10947	113833	-100.076
25	C1	13	53147.9	7905.42	8719.07	102739	-1480.72																25	C1	13	62087	6503.36	12354.2	128808	-257.645
26	C2	13	53834.1	7792.03	9468.49	99761.1	763.875																26	C2	13	59606.2	6086.54	13722.1	124664	3403.07
27	C3	13	50989	6650.37	9004.35	94161.9	-1540.7																27	C3	13	51903.4	5585.46	12852	111638	-530.151
28	C4	13	40623.2	4927.36	10913.1	99960.5	78.9403																28	C4	13	34791.1	2772.81	1698.29	2521.71	1123.13
29	C5	13	54115.7	5825.09	10411.4	94098.7	248.454																29	C5	13	29814.4	2144.54	1453.4	2214.02	927.029
30	C6	13	-13806.7	4210.88	10368.3	93342.5	-613.844																30	C6	13	-24843.7	2356.26	1175.94	1910.31	722.065
31	C7	13	48426.4	5359.37	10843.1	91170	-1078.05																31	C7	13	28493.2	2403.17	2232.62	1604.46	254.893
32	C8	13	43233.1	5648.46	11673.6	96755.5	-1102.23																32	C8	13	32567.6	2417.76	1612.04	2269.09	172.139
33	C9	13	12337.7	1791.6	9227.46	88951.5	-1036.14																33	C9	13	25681.8	2353.63	1297.02	2324.92	-710.628
34	C10	13	14336	2231	9487.75	92066.4	-1103.86																34	C10	13	32897.8	2178.66	1674.25	1981.4	627.756
35	C11	13	12814	2327.11	8337.31	92797.8	-1453.38																35	C11	13	49510.8	4806.53	2873.81	4148.45	2457.81
36	C12	13	12092.2	2979.85	7234.18	91465.3	-275.184																36	C12	13	38178.2	3447.73	1638.24	3127.06	3053.92
37	D1	13	407546	57767.4	6521.74	75493.3	717.128																37	D1	13	124311	14788.2	12086.4	128118	1557.54
38	D2	13	472044	58870.2	12034.3	119589	815.785																38	D2	13	158295	18207.9	12793.4	118114	1746.4
39	D3	13	506189	56724.6	10412.3	94098.2	13.3982																39	D3	13	134661	14471	12467.8	105343	346.668
40	D4	13	13880.7	1535.65	10189.3	88812.1	-155.611																40	D4	13	45447.8	3631.78	13682.3	110202	756.425
41	D5	13	15385.1	1830.15	10401.6	88114.7	1949.99																41	D5	13	62981.7	15173.7	14760.3	103971	753.596
42	D6	13	15151.6	1893.76	10465	88065.7	-545.663																42	D6	13	43731.7	5754.59	14008.9	103347	42.7183
43	D7	13	12080.4	1473.1	10233.2	86043.6	-1375.69																43	D7	13	37778	3208.04	13660.7	104799	-458.687
44	D8	13	16328.1	1638.3	10419.6	88598.8	-673.132																44	D8	13	51533.5	5646.59	14238.6	104499	2208.28
45	D9	13	12936	1833.92	10726.8	93698.2	-815.961																45	D9	13	41567.2	3981.41	13662	106208	-129.143
46	D10	13	23986.2	4752.09	8751.38	88461.6	103.112																46	D10	13	47248.6	4468.32	13685.1	110620	863.669
47	D11	13	31548.9	8010.92	9952.23	101988	-1511.67																47	D11	13	47557.7	4596.98	12220.1	116572	-554.153
48	D12	13	13963.8	2327.71	7838.26	94966.2	-1543.89																48	D12	13	40749.7	4466.1	10364.7	108288	-909.264
49	E1	13	407755	57245.4	9814.67	116151	212.295																49	E1	13	787637	109834	13812	141796	940.558
50	E2	13	402283	49608.1	9765.9	109077	-60.9681																50	E2	13	769220	95166.1	14796.1	127097	2532.57
51	E3	13	509428	56174.8	10483.2	102568	915.302																51	E3	13	708087	78884.6	14190	117977	1848.59
52	E4	13	86666.1	8479.75	10260.6	90705.9	-110.447																52	E4	13	61509.1	6681.65	13685.8	104577	651.806
53	E5	13	70290.4	7561.1	9991.64	85096	207.434																53	E5	13	47107	8144.79	12997.9	95890.7	810.733
54	E6	13	75445.6	7323.89	10222.5	83956.4	-303.395																54	E6	13	42849.9	5022.74	12975.7	99080	499.131
55	E7	13	17562.4	1849.77	10201.7	87611.1	539.82																55	E7	13	616395	61106.9	14573	104484	1343.11
56	E8	13	117570	20221.2	10671.8	85362	-634.667																56	E8	13	587713	58640.6	13593.9	99944.7	408.991
57	E9	13	15234	1629.8	10361.6	91939.6	-573.174																57	E9	13	629268	64995.1	14087.6	110678	704.848
58	E10	13	17370.9	2333.97	9669.01	92614.8	-605.761																58	E10	13	51560.8	5829.58	12228.2	106244	351.775
59	E11	13	17337.3	2036.69	10059.4	103012	-435.991																59	E11	13	65822.1	7303.82	13296.9	116195	900.052
60	E12	13	15737.4	2485.9	8007.63	97634.1	-715.313																60	E12	13	80985.5	12858.8	11069.6	118970	20.096
61	F1	13	22741.9	3158.05	10799.9	127192	-1119.55																61	F1	13	92617.9	11828.4	15733.7	157940	206.742
62	F2	13	22981.4	3101.22	10177.4	111967	-1956.22																62	F2	13	75216	8451.62	13737.2	132244	-453.015
63	F3	13	20594.7	3744.37	10826.9	101583	-1414.5																63	F3	13	81750.9	8854.89	14338.7	121361	-711.648
64	F4	13	17618.2	1896.14	11719.9	107830	513.31																64	F4	13	68410.1	12257.9	15627.3	115220	1283.67
65	F5	13	27845.3	3195.69	10323.2	92123.2	-23.6949																65	F5	13	53938	5487.21	13541.4	105646	882.938
66	F6	13	25163.7	2880.34	10986.2	95318.5	-365.414																66	F6	13	56550.1	5339.36	14289.8	110912	-66.9081
67	F7	13	24995.7	3089.36	10772	89780	-1017.71																67	F7	13	670645	65949.5	14899.4	106494	3166.68
68	F8	13	28661.8	3750.52	12548.8	99184.6	-839.682																68	F8	13	788277	78938	16046.9	118749	222.396
69	F9	13	31459	3792.02	11167.5	101216	1123.7																69	F9	13	759852	80178	16009.1	121039	2637.98
70	F10	13	516312	58554.9	10454.8	99879.2	-1165.34																70	F10	13	716578	81458.7	14339.1	111879	-533.335
71	F11	13	568161	71124.5	10416.6	103727	139.545																71	F11	13	733696	91843.8	13885.3	120666	949.501
72	F12	13	566592	80818.8	9866.32	106310	-2421.91																72	F12	13	735251	104864	13363.6	126193	-1110.53
73	G1	13	37912.1	5342.44	10697.8	132363	-1938.78																73	G1	13	234889	32138.7	15510.2	162682	-391.15
74	G2	13	32014.3	4482.19	9905.95	118892	-1295.88																74	G2	13	191330	25494.9	15603.3	156742	70.474
75	G3	13	29856.3	4311.28	11017	113459	-1081.97																75	G3	13	186816	22690.9	15793.7	135729	98.3039
76	G4	13	33802.5	5073.94	11016.8	109498	-1920.62																76	G4	13	113373	24978.2	17288	139837	-985.169
77	G5	13	26273.4	3489.24	10282.2	92501	-637.459																77	G5	13	53673.5	5627.24	13458	109265	494.169
78	G6	13	27902.5	4580.98	11265.7	98951.7	-693.053																78	G6	13	72021.1	12735.3	16121	111914	1935.18
79	G7	13	29140	3796.88	10704.7	92907.3	41.8955																79	G7	13	60162.6	6911.32	13697.7	106637	1022.47
80	G8	13	30181.7	3744.86	11184.6	100703	-1936.97																80	G8	13	67859.1	7100.66	14636.4	116302	297.767
81	G9	13	30490.3	3439.17	11033.6	101462	127.841																81	G9	13	69987	8908.09	15802.8	123255	1812.59
82	G10	13	564448	67479.4	10689.2	97846.7	-197.602																82	G10	13	76663	8354.04	24687.9	232132	1092.4
83	G11	13	552680	72246.8	9661.05	98109.5	-1066.97																83	G11	13	63121.2	7438.54	12951.3	121384	-0.403479
84	G12	13	701721	103356	11201.5	121369	-2774.29																84	G12	13	73744.3	14061.7	14848.5	150446	-1335.49
85	H1	13	128992	21163.5	9545.52	128414	-691.327																85	H1	13	78471.9	10743.5	12529.3	150347	641.167
86	H2	13	120992	18412.2	9366.11	119746	-1156.5																86	H2	13	76816.9	10231.6	14005.2	160372	-219.284
87	H3	13	106224	14063.7	9763.23	113632	-1678.22																87	H3	13	70029.7	11947.2	14105.7	132161	-315.646
88	H4	13	30569.3	4937.49	9730.23	110556	-591.064																88	H4	13	36978.3	3605.11	1166.72	2625.2	1714.28
89	H5	13	38044.2	5511.54	11444	110056	-1253.57																89	H5	13	43697.4	5072.78	2123.6	3459.75	1004.52
90	H6	13	36647.2	4785.69	12303.8	116109	-807.781																90	H6	13	138793	11459.4	5587.07	5275.92	2581.05
91	H7	13	29805.6	4432.29	11565.9	110552	-2197.7																91	H7	13	30898.4	3017.83	1972.5	2373.66	927.928
92	H8	13	32487.5	4937.77	12461.2	116802	-507.94																92	H8	13	37923	2828.98	2117.46	2202.46	2420.27
93	H9	13	29425.1	4183.07	9852.07	104416	-469.84																93	H9	13	43091	3626.18	2111.73	2238.86	1956.89
94	H10	13	28758.7	4118.13	9131.84	105285	1787.87																94	H10	13	59763.6	7463.13	14913.2	128953	1632.72
95	H11	13	31612.4	4933.18	9118.59	115115	-1424.09																95	H11	13	65026.4	8754.04	12232.8	138934	-867.855
96	H12	13	31825.7	5726.8	9644.44	118351	-1340.99																96	H12	13	87218.4	17886.3	12982.8	140517	-292.726
1	A1	14	58432.6	9040.5	9008.53	116268	-799.173																1	A1	14	778615	126265	13294.9	142727	78.8969
2	A2	14	62318.8	8354.6	9181.15	114638	-68.4013																2	A2	14	806594	115384	13556.2	143109	214.061
3	A3	14	63295.9	7735.85	10156.7	113379	-1982.64																3	A3	14	773214	100469	14482.4	136194	-505.362
4	A4	14	610510	72849.8	11219.7	115562	-150.03																4	A4	14	51669.6	4437.82	14048.3	132077	688.493
5	A5	14	604379	68686.2	11699.6	110086	-726.077																5	A5	14	57736.1	5578.9	15194	130765	512.793
6	A6	14	603741	66704.3	11786.4	108020	-1177.46																6	A6	14	62561.7	4871.94	15150.7	129941	-545.202
7	A7	14	48716.9	6337.24	11116	106252	-1052.74																7	A7	14	747073	82815.8	16386.3	132715	-704.453
8	A8	14	51785.8	6381.79	12209.5	113015	-1812.76																8	A8	14	806714	91096	16885	136584	-497.256
9	A9	14	44557.6	5811.84	10955	111245	-3003.42																9	A9	14	772872	91725.5	15832.6	133477	-1795.5
10	A10	14	49751.2	6638.09	10165.3	108993	-1782.67																10	A10	14	44596.8	4419.25	13197.3	133722	-1201.33
11	A11	14	53925	8539.17	8720.59	108642	-1820.33																11	A11	14	49632.1	5293.44	12177	140811	-1503.08
12	A12	14	56394.6	8306.7	8508.61	115682	-1944.35																12	A12	14	55291	6278.81	11737.1	139059	-1231.57
13	B1	14	59703.2	9070.55	9564.23	121746	-2617.33																13	B1	14	69564	7005.11	13389	146120	-809.762
14	B2	14	51036.5	7270.18	8752.76	99657.1	-1864.97																14	B2	14	140052	47575.3	17493.2	135154	-231.843
15	B3	14	51766.4	6079.14	9826.18	104121	-1221.29																15	B3	14	112069	10306.5	14746.6	124249	-303.57
16	B4	14	565673	62837.8	11894	111247	-188.288																16	B4	14	48522.7	4848.1	13807.9	121972	449.185
17	B5	14	556077	58494.3	11053.3	96773.4	56.3503																17	B5	14	83231.6	5937.89	13986.5	113681	776.325
18	B6	14	536487	54863.8	11266.9	94857.3	-310.283																18	B6	14	43063.8	4043.04	13789.3	113754	380.414
19	B7	14	119059	13138.5	13264.9	109208	-1790.65																19	B7	14	797470	81764.3	16495	122040	-1032.17
20	B8	14	123965	12762.5	10956.8	98966.8	-415.654																20	B8	14	808753	84632.8	15871.9	121080	339.646
21	B9	14	127479	13962.6	11366.9	106228	-324.456																21	B9	14	825768	90642.7	15915.6	128624	252.635
22	B10	14	46873.1	6037.05	8706.59	88907	-1122.43																22	B10	14	662526	81523	14090.1	115957	497.902
23	B11	14	38985.7	5057.67	9099.88	102317	-1709.81																23	B11	14	625492	84434.8	12583.5	111207	-212.619
24	B12	14	37247.9	6019.68	7502.75	93809.3	-836.427																24	B12	14	647725	100137	10944.5	113640	-261.417
25	C1	14	52735.2	7717.71	8650.77	102088	-1412.32																25	C1	14	60827.1	5922.12	12713.8	128921	-189.464
26	C2	14	53428.9	7341.24	9582.67	99144.7	592.127																26	C2	14	58671.8	6374.88	13207.8	124664	3911.35
27	C3	14	50700	6470.85	9581.54	94484	-1179.78																27	C3	14	52491.9	5511.35	12811.8	111977	-571.381
28	C4	14	41032.4	4647.4	10624.7	99960.7	-427.302																28	C4	14	34768.9	2743.08	1661.45	2676.02	1611.61
29	C5	14	52918.7	5116.03	10604	93766.4	126.521																29	C5	14	29608	2461.72	1285.93	2191.81	997.899
30	C6	14	-13743.9	4135.37	10426.2	93544.5	-548.161																30	C6	14	-24506.8	2369.56	1270.57	1818.51	755.858
31	C7	14	48178.6	5424.81	11136.8	91373.3	-1147.16																31	C7	14	27985.4	2212.69	1870.66	2021.13	202.833
32	C8	14	42946	5178.81	11434.2	96693.9	-934.253																32	C8	14	32526.9	2511.76	1997.83	2478.02	693.087
33	C9	14	11826.3	1552.16	9399.43	88535.7	-1027.57																33	C9	14	25558.8	2323.77	1447.45	1853.96	-600.3
34	C10	14	13918.3	1518.7	9408.42	91922	-1458.04																34	C10	14	32848.2	2511.72	1447.35	1932.04	1085.48
35	C11	14	12736.8	2010.4	8464.25	92459.1	-1577.41																35	C11	14	50047.5	4707.06	2711.88	3953.36	2615.61
36	C12	14	11857.5	2359.43	7404.14	91816.6	-377.637																36	C12	14	38631.4	3987.09	1248.36	2936.48	3112.35
37	D1	14	408861	58022	6668.72	75400.9	699.977																37	D1	14	124190	14377.3	12028.9	127907	1067.7
38	D2	14	473647	59358.5	11759.7	119539	439.36																38	D2	14	159372	18435.6	12396.3	118105	1776.59
39	D3	14	506473	56846	10517.2	94368	183.924																39	D3	14	134864	14322.1	11880.6	105138	271.133
40	D4	14	13773.1	1447.41	10037.3	89215.5	-291.577																40	D4	14	44568.2	3598.51	13235.6	109828	571.981
41	D5	14	15719.9	1676.79	10080.9	88400.9	1754.22																41	D5	14	63564	15181.5	14795.6	103681	639.777
42	D6	14	15403.6	1977.22	10190.8	88493.1	-632.891																42	D6	14	43945.9	5822.21	13777.7	102954	-30.1194
43	D7	14	12624.2	1435.45	10037.4	86085.5	-1196.25																43	D7	14	37612.5	3499.7	13396.2	104705	-1310.01
44	D8	14	16151.6	1901.99	10561.2	88539.8	-620.875																44	D8	14	50530.5	5488.12	13715	104445	1997.93
45	D9	14	12747.7	1658.16	10647.9	93792.6	-762.442																45	D9	14	40651.1	4135.24	13070.6	106489	-310.863
46	D10	14	23192.6	4416.31	8827.96	88493.9	76.2953																46	D10	14	47165.6	4761.15	13925.3	110804	766.161
47	D11	14	31981.6	8702.56	9810.86	102225	-1867.21																47	D11	14	46719.1	4753.58	12061.9	115957	-660.404
48	D12	14	13114.9	2295.49	7799.58	94831.7	-1564.66																48	D12	14	41635.3	4447.34	10254.6	108021	-642.663
49	E1	14	408781	57401.7	9929.65	115908	133.842																49	E1	14	787313	110112	14055.9	141672	1328.74
50	E2	14	403678	49324.4	10101.1	108866	67.2886																50	E2	14	769710	95342.7	14844.2	127070	2747.91
51	E3	14	509015	56089.1	10639.5	102534	1217.56																51	E3	14	708691	78882.2	14463.4	117400	2048.16
52	E4	14	86265.9	8788.77	10381.4	90930.1	68.8684																52	E4	14	61888.6	6551.23	13603.7	104344	322.961
53	E5	14	70545.3	7136.68	9883.86	84561.9	116.217																53	E5	14	47469.5	8046.51	13278.7	95735.3	568.37
54	E6	14	75916.2	7492.41	9985.61	83510.1	-196.161																54	E6	14	42348.4	4745.04	13210.3	99012.2	456.48
55	E7	14	17563	1491	10371.6	87574.7	1024.25																55	E7	14	615918	61154.4	14345	104456	1419.22
56	E8	14	118669	20034.6	10990.7	85292.2	-805.851																56	E8	14	588687	58863.3	13687.1	100153	336.964
57	E9	14	14813	1676.82	10219.2	92247.7	-302.829																57	E9	14	630243	65343	14323.6	110816	559.608
58	E10	14	16396.8	2453.15	9573.76	92775.5	-357.298																58	E10	14	51695.9	6000.25	12355.9	106264	133.832
59	E11	14	16925.8	2510.35	9933.69	102404	-177.634																59	E11	14	66285.8	7424.07	13799.1	115934	994.748
60	E12	14	15700.4	2185.95	7964.03	97387.2	-937.115																60	E12	14	80912.1	12854.6	11223.3	119073	-208.604
61	F1	14	21867.9	2853.59	10444.8	126858	-963.027																61	F1	14	93625.4	12037.8	15926.3	158158	258.956
62	F2	14	23481.9	3507.33	10198.4	112281	-1294.65																62	F2	14	76747.4	9269.38	13698.5	132770	-447.98
63	F3	14	20890.5	3724.54	11105.6	101798	-1559.12																63	F3	14	83565.6	9277.28	14766.4	121709	-690.411
64	F4	14	17637	2100.84	11979.5	108032	707.824																64	F4	14	68364.8	12306.4	15205	115637	1448.89
65	F5	14	27997.2	3341.47	10312.9	92130.3	0.745779																65	F5	14	53784.2	5518.86	13428.2	105247	776.032
66	F6	14	26012.7	2589.31	10835.2	95192.6	-199.927																66	F6	14	57096.8	5663.65	14465.8	110892	-275.914
67	F7	14	25647.8	3080.19	10878.5	89694.7	-415.969																67	F7	14	671569	66181.2	14532	106680	3042.46
68	F8	14	28964.6	3643.81	12437.4	98936.5	-418.186																68	F8	14	787422	78545.4	16057	118811	-53.4501
69	F9	14	31341.1	3507.7	11237.5	100695	1024.79																69	F9	14	757696	79828.1	15611.2	121309	2695.47
70	F10	14	516824	58729.4	10621.2	100006	-814.529																70	F10	14	716925	81689.6	14190.7	112007	-168.89
71	F11	14	570749	71198.2	10419.4	104073	22.4859																71	F11	14	735968	92331.9	13776.9	121021	1066.64
72	F12	14	567455	80223.3	9455.04	106776	-1944.96																72	F12	14	736552	105245	13661.5	126040	-942.502
73	G1	14	37348.6	4898.74	10842.1	132149	-1419.55																73	G1	14	235524	32498.5	15421.2	163155	-173.389
74	G2	14	32916	3836.92	10230	118580	-537.117																74	G2	14	194366	26594.8	16100.1	156686	80.7274
75	G3	14	28943.3	3815.15	10741.4	113359	-1144.34																75	G3	14	188845	23118.2	15737.1	135807	-281.935
76	G4	14	32453.2	4835.27	11269.7	109591	-1669.3																76	G4	14	113553	24687.8	17346.4	140594	-1028.17
77	G5	14	25813.7	3399.5	10472.3	92505.4	-190.775																77	G5	14	54156.3	5607.26	13796.9	109423	625.288
78	G6	14	27384.9	4365.41	11450.4	99349.5	-977.311																78	G6	14	71737.6	12764	15934.6	112101	1751.03
79	G7	14	28497.6	3525.01	10669.6	92883.7	254.87																79	G7	14	63599.9	6938.34	13639.2	106487	826.545
80	G8	14	30491	3521.19	11400.8	100595	-1788.6																80	G8	14	69800.8	7405.86	15196.3	116227	252.356
81	G9	14	29548.9	3345.36	10784	100992	467.852																81	G9	14	71483.4	8880.92	15529	123321	1781.1
82	G10	14	564466	66985.5	10743.3	97774.8	-140.453																82	G10	14	79278.5	8627.64	24903	232417	698.909
83	G11	14	551534	72626.8	9342.45	97825.8	-523.378																83	G11	14	63073.8	7539.63	12736.4	120908	449.161
84	G12	14	700734	102563	10787.6	121118	-2483.69																84	G12	14	74210.3	13641	14942.7	150894	-1807.03
85	H1	14	128001	21300.5	9776.59	128172	-638.811																85	H1	14	77964.6	11058.7	12705.1	150247	251.353
86	H2	14	122692	18129.9	9323.02	119714	-1089.19																86	H2	14	77301.9	10707.4	13906.3	160332	-501.217
87	H3	14	106483	14028.9	9279.49	113699	-1741.49																87	H3	14	69287.9	12120.3	14096.1	131999	-536.421
88	H4	14	30852.7	5160.11	9644.85	110687	-212.721																88	H4	14	37050.3	3361.68	1308.38	2503.24	1577.48
89	H5	14	37773.1	6052.2	11298.2	109571	-999.031																89	H5	14	44388.7	4891.91	2978.65	3271.61	1131.66
90	H6	14	36930.1	4850.07	12061.8	116665	-1093.77																90	H6	14	138492	11346.9	5905.17	5536.91	3111.3
91	H7	14	30342.7	4500.45	11475.2	110013	-1923.25																91	H7	14	29749.8	2900.18	2032.22	2565.55	848.3
92	H8	14	31272.1	4421.53	11912	116949	-603.665																92	H8	14	38375.5	3007.44	2116.13	2333.64	2567.8
93	H9	14	29663.6	4586.27	9739.69	104891	-1060.77																93	H9	14	44553.1	3830.3	2161.22	2546.15	1942.18
94	H10	14	28351.8	3837.47	9422.16	105085	2171.63																94	H10	14	61092.7	7612.28	15056.8	128412	2286.28
95	H11	14	31293.5	4716.72	8938.72	115564	-1161.17																95	H11	14	64654.5	8864.73	12350.8	138553	-636.531
96	H12	14	33133.2	6025.21	9195.59	118914	-1095.37																96	H12	14	87525.5	18376.1	13432.6	140504	-371.413
1	A1	15	58105.5	8431.39	8935.06	115360	-615.013																1	A1	15	777273	126287	13227.7	142746	-625.362
2	A2	15	62213.5	8310.22	8861.35	114914	-630.983																2	A2	15	807713	115929	13596	143360	705.102
3	A3	15	62311.3	7814.88	10107.2	113154	-1606.04																3	A3	15	773080	100590	14680.8	136589	-233.171
4	A4	15	612248	72580.9	11322.8	115218	35.6542																4	A4	15	50909.1	4523.63	14107.1	132876	641.839
5	A5	15	603599	68743.8	11627	110350	-875.992																5	A5	15	57402.6	5725.43	15344.9	130620	386.163
6	A6	15	604426	66284.8	11535.5	108114	-1166.98																6	A6	15	62911.6	4697.56	15185.2	129930	-521.806
7	A7	15	49389.9	6398.99	11254	105992	-1070.26																7	A7	15	746908	82733.4	16382.3	132690	-945.799
8	A8	15	52130.4	5831.54	12382.3	113295	-882.62																8	A8	15	806533	91156.8	16553.9	136612	-826.3
9	A9	15	43912.1	6498.11	10774.7	111694	-3232.99																9	A9	15	773602	91867.5	15756.9	134032	-2019.84
10	A10	15	49423.5	6378.56	9861.53	109230	-1548.96																10	A10	15	43942.7	4696.77	13215.5	134045	-1260.02
11	A11	15	54689	8349.68	8513.24	108477	-1659.24																11	A11	15	50030.9	5761.08	12708.9	141116	-1457.83
12	A12	15	55982.3	8961.44	8742.41	115731	-1585.81																12	A12	15	55295.1	6290.38	11977	139427	-1649.76
13	B1	15	60325.5	8314.82	9595.19	122293	-1980.21																13	B1	15	70606.9	6128.97	12633.8	146183	-1389.78
14	B2	15	51117.3	6964.42	8883.39	99816.6	-1337.76																14	B2	15	141143	47485.2	17053.1	135186	55.904
15	B3	15	51437.2	5652.43	10147.5	104146	-935.959																15	B3	15	112890	10302.2	14787.8	123935	-94.7961
16	B4	15	566544	62631.1	11427.8	111144	-190.933																16	B4	15	48078.4	4412.98	13747.6	121842	640.697
17	B5	15	555641	58383.4	10951.3	96721.5	572.747																17	B5	15	83687.6	5718.93	14365	113734	693.141
18	B6	15	536587	54461.7	10945.2	94303.9	-125.975																18	B6	15	43191.7	4210.93	13918.9	113690	464.75
19	B7	15	118561	13154.9	13160.7	109366	-1501.77																19	B7	15	798260	81449.9	16357.7	121842	-854.78
20	B8	15	124248	12736.7	10877.4	98783.9	-383.249																20	B8	15	808042	84247.2	15833	120788	31.9251
21	B9	15	127293	13850.3	11564	105732	-87.158																21	B9	15	825194	90324.4	15658.1	128758	276.028
22	B10	15	45572	6110.66	8664.72	89186.2	-677.669																22	B10	15	662576	81501.4	13823.6	115601	692.843
23	B11	15	39045	5152.81	9216.14	102341	-1639.4																23	B11	15	627121	85103.3	12145.1	111441	-342.985
24	B12	15	37263.4	6174.97	7553.27	93782.4	-1138.68																24	B12	15	646815	100155	10773.8	113583	-296.453
25	C1	15	53869.4	8056.45	8581.92	102572	-1041.57																25	C1	15	60587.7	6355.84	12709.7	128034	-396.038
26	C2	15	53623.4	7889.69	9688.65	99136.8	637.958																26	C2	15	59590.6	5917.82	13284.2	124929	3905.54
27	C3	15	50415.5	6442.9	9464.1	94576	-1468.02																27	C3	15	52524.6	5729.82	12917.1	111995	-460.297
28	C4	15	40813.7	4634.54	10925.7	100015	-88.541																28	C4	15	34519.4	2937.4	1791.89	2255.5	1337.63
29	C5	15	54457.2	5286.62	10656.5	93766.3	483.709																29	C5	15	29906.2	2011.47	1426.86	2112.98	1150.27
30	C6	15	-14412.3	4232.85	10238.7	93633	-242.699																30	C6	15	-24613.2	2307.7	1235.68	1627.55	1087.46
31	C7	15	48123	5083.71	10926.5	91109.5	-1118.38																31	C7	15	28006.3	2422.27	1644.11	1819.61	129.457
32	C8	15	43218.3	5382.37	11685.1	96576.4	-894.473																32	C8	15	31545.3	2577.61	1890.92	2065.76	687.388
33	C9	15	11686.4	1939.23	9702.97	88870.7	-1046.15																33	C9	15	25222.9	2190.08	1161.1	2081.68	-396.332
34	C10	15	14160.4	1984.91	9468.14	91926.6	-1126.38																34	C10	15	33120.7	2319.8	1894.11	1743.23	732.898
35	C11	15	14175.4	2457.27	8543.97	92640.6	-1341.56																35	C11	15	49586.1	4801.42	2799.85	3685.11	2926.6
36	C12	15	11449.6	2686.38	7139.3	91412.5	-616.415																36	C12	15	38401	3678.77	1490.13	3042.76	3035.54
37	D1	15	409924	57893.8	7095.23	75213.7	778.151																37	D1	15	125186	14698.1	12585.1	128161	1740.45
38	D2	15	474774	59801.1	11895.4	120079	691.941																38	D2	15	159038	18428.6	13020.6	118514	1793.36
39	D3	15	507532	56720.3	10508.9	94205.7	-22.2833																39	D3	15	136805	14634.2	12167.4	105176	715.52
40	D4	15	13260.8	1419.84	10166.2	88795.9	21.2236																40	D4	15	44380.6	3475.18	13476.9	110073	514.84
41	D5	15	15171.9	1709.27	10158.2	88519.2	2000.51																41	D5	15	62898	15061.9	14736.6	103645	607.144
42	D6	15	15459	1995.47	10567.7	88355.2	-544.128																42	D6	15	44070.8	5846.09	13741.7	103413	234.31
43	D7	15	12297.5	1331.3	10268	85973.2	-1090.06																43	D7	15	38173.5	3363.52	13744.2	104260	-813.834
44	D8	15	16655.7	1660.31	10500.3	88286.5	-639.697																44	D8	15	50970.6	5545.57	14099.4	105004	1987.24
45	D9	15	12847	1462.68	10506	93903.8	-593.95																45	D9	15	41113.9	3761.11	13392.7	106632	-135.781
46	D10	15	23623.1	4622.53	8815.35	88261.4	354.645																46	D10	15	47059.5	4357.12	13601.4	110446	1030.6
47	D11	15	31004.7	8382.09	10089.9	102359	-1684.63																47	D11	15	47291.7	4611.83	12417.6	116180	-837.992
48	D12	15	13482	2047.84	7903.47	95056.6	-1478.69																48	D12	15	41041.6	3930.15	10022	108000	-905.336
49	E1	15	411413	57462.1	9493.48	116128	220.649																49	E1	15	785484	110045	14070.1	141775	1102.64
50	E2	15	405117	49780.1	9987.1	108736	-445.549																50	E2	15	769736	95608	14512.9	127691	2272.61
51	E3	15	509210	56098.7	10354.1	102439	744.93																51	E3	15	710830	78963.1	14287.6	117921	1805.37
52	E4	15	87408.8	9139.24	10457.2	90654.5	-352.456																52	E4	15	61909.8	6563.22	13506.2	104456	739.4
53	E5	15	70825.8	7286.05	9866.55	85034.8	279.536																53	E5	15	47763.4	8229.05	13034.6	95734.2	740.907
54	E6	15	75396.7	7724.28	10218.2	84048.5	-417.241																54	E6	15	43672.1	5141.58	13084.3	99017.1	300.174
55	E7	15	17207.7	1768.75	10280.3	87923.4	822.376																55	E7	15	615887	61086.8	14345.5	104660	1394.93
56	E8	15	121289	20773.5	11188.5	85950.6	-725.749																56	E8	15	588969	58988.1	13543.2	99767.1	420.036
57	E9	15	14446.9	1727.18	10327.9	92577.3	-215.874																57	E9	15	630824	65748.4	14110.4	111228	202.956
58	E10	15	16436.6	2305.87	9571.29	92635.4	-406.675																58	E10	15	51889.3	5860.18	12034.9	106515	589.806
59	E11	15	16543.9	2334.69	9922.12	102621	-56.2429																59	E11	15	66268.4	7677.6	13314.1	116382	800.533
60	E12	15	15869.4	2457.5	8276.51	97505.4	-796.175																60	E12	15	79403.9	12821.9	11045.1	120130	-148.655
61	F1	15	21431.1	3349.46	10921.4	127729	-781.754																61	F1	15	99695.9	12789.9	15529.6	157990	542.753
62	F2	15	22824.4	3825.1	10158.7	112185	-1172.34																62	F2	15	81269	9698.52	13650.8	132776	-660.506
63	F3	15	20913.2	3604.71	11126.5	100943	-1346.81																63	F3	15	86868.9	9155.25	14540	121402	-738.87
64	F4	15	17772.5	2140.75	12072.3	107736	661.35																64	F4	15	68350.2	12531.1	15449	115592	1594.21
65	F5	15	27649	3436.71	10318.3	91750.5	-114.076																65	F5	15	54486.3	5454.51	13491.7	105650	815.294
66	F6	15	24790.7	3184.52	11146	95076.1	-265.491																66	F6	15	57545.8	5210.16	14440.9	110832	-21.2248
67	F7	15	26168.7	3300.11	10601.7	89834.7	-397.176																67	F7	15	671406	65917.2	14969.9	106896	3109.95
68	F8	15	28566.1	3914.92	12417.4	99056.2	-592.801																68	F8	15	788317	78447.6	16270.8	118718	394.021
69	F9	15	32063.7	3566.74	11193.1	101096	1070.06																69	F9	15	756725	79828.2	15798.6	121185	2584.45
70	F10	15	519480	58979.9	10079	99413.3	-743.25																70	F10	15	718390	81898.5	14169.1	111974	104.688
71	F11	15	570434	71139.2	10520.4	103708	-118.646																71	F11	15	735651	92299.5	13995.3	120896	1020.65
72	F12	15	569391	80718	10020.9	106683	-2006.82																72	F12	15	737405	105527	13142.9	125949	-548.405
73	G1	15	39041.1	5289.81	10933	132449	-1782.4																73	G1	15	239715	33039.3	16077.8	163011	-863.654
74	G2	15	33248.6	3732.4	10072.6	118630	-866.103																74	G2	15	196346	26320.5	16114.2	156168	102.11
75	G3	15	28736.6	4144.16	11221.9	113477	-1424.79																75	G3	15	192549	23470.6	16093.9	135854	-65.5246
76	G4	15	32983.3	4572.32	11177.5	109229	-1876.81																76	G4	15	115171	24950.5	17428.5	141198	-1331.16
77	G5	15	26706.1	3432.41	10090.5	92681.2	-333.871																77	G5	15	54089.8	5997.83	13880.4	109428	560.859
78	G6	15	27788.8	4327.7	11330.2	99133.8	-779.177																78	G6	15	72494.7	13102.6	15991	111904	1800.43
79	G7	15	28807.8	3440.93	10645.5	92488	126.668																79	G7	15	67092.7	7416.02	13753.3	106553	958.604
80	G8	15	30026	3465.2	11093.1	100478	-1682.19																80	G8	15	73297	7737.15	15190.1	116644	496.532
81	G9	15	29994.4	3558.5	11100.7	101322	66.4356																81	G9	15	75389.9	9630.75	15756.2	123470	1712.05
82	G10	15	563856	67323.1	10958.6	98275.3	-414.922																82	G10	15	82003.2	9472.37	24935.2	232198	245.87
83	G11	15	552299	71932.1	9655.1	97628.2	-1179.35																83	G11	15	64360.9	7539.57	13623.6	121654	198.889
84	G12	15	701421	102775	11316.2	121065	-2667.18																84	G12	15	74347.1	13698.4	14893.1	150713	-1745.85
85	H1	15	129435	21098.3	9824.9	128279	-563.978																85	H1	15	77748.3	10699.6	12526.9	150090	533.871
86	H2	15	123974	18397	9285	119835	-1764.28																86	H2	15	75981.8	10174.2	14517.4	159961	109.825
87	H3	15	106948	14431.5	9496.31	113972	-1887.66																87	H3	15	69926.2	12500.5	13598.4	131988	-223.813
88	H4	15	30891	5355.69	9693.63	110841	-208.324																88	H4	15	36687.1	3849.29	1144.74	2130.47	1570.59
89	H5	15	38779	5505.7	11545	109740	-1045.77																89	H5	15	44577.9	5175.95	2321.23	3242.27	1074.75
90	H6	15	37152.1	4980.11	12467.8	116247	-1389.07																90	H6	15	138776	11641	5980.36	5099.19	2963.4
91	H7	15	30949.4	4228.05	11582.7	109819	-2288.81																91	H7	15	30771.6	3324.93	1743.49	2683.67	1180.38
92	H8	15	32486.5	4755.92	12061.2	116550	-628.953																92	H8	15	38910.8	3168.9	1708	2041.1	2639.45
93	H9	15	29316.1	4647.82	9888.99	104606	-1003.92																93	H9	15	43294.7	3974.73	1905.9	2168.02	1841.5
94	H10	15	28323.8	3970.25	9298.15	105491	1806.9																94	H10	15	61153.1	7689.36	14857.3	128164	2296.65
95	H11	15	32074	5500.5	8749.51	115285	-1594.71																95	H11	15	65356.5	9069.28	12392.3	138488	-1347.08
96	H12	15	34352.9	6455.61	9296.19	118309	-1600.97																96	H12	15	87723.6	18449.9	13012.5	139479	-202.089
1	A1	16	58665.3	9013.48	8831.41	115363	-695.801																1	A1	16	777501	127286	12955.3	142257	-406.257
2	A2	16	61452.8	8318.34	9278.01	114949	-425.021																2	A2	16	807897	115659	13352.2	143586	167.646
3	A3	16	62227.6	7669.7	9880.46	113225	-1432.02																3	A3	16	774602	101231	13970.7	137029	-701.167
4	A4	16	611104	73447.3	11379.9	115168	-184.579																4	A4	16	51314.6	4763.42	13738.8	131913	633.336
5	A5	16	604645	69077.5	12138.4	110161	-1164.82																5	A5	16	57701.2	5252.14	15330.5	130816	759.112
6	A6	16	603919	66597.8	11786	108173	-841.137																6	A6	16	63451	4863.14	15139.2	129693	-457.576
7	A7	16	49409.8	6486.89	11082	105857	-859.614																7	A7	16	747121	83075.3	15876.8	132564	-722.933
8	A8	16	51609.5	6376.2	12545.6	113284	-1103.25																8	A8	16	806743	90849.6	16585.3	135901	-415.979
9	A9	16	43946.4	6703.78	11318.8	111630	-3169.06																9	A9	16	773372	91690.6	15695.8	133570	-2158.01
10	A10	16	49430.5	6815.78	9843.41	109422	-1903.18																10	A10	16	44797.2	4552.41	13074.8	133598	-925.733
11	A11	16	54228.9	8217.23	8842.91	108726	-1730.92																11	A11	16	49145	5829.18	12284.3	140992	-1167.49
12	A12	16	56318.4	8729.8	8245.7	115499	-1972																12	A12	16	54813.9	6120.28	11204.9	139385	-1428.84
13	B1	16	60631.3	8955.22	9515.83	122204	-2030.48																13	B1	16	69256.9	7255.1	12882.5	145944	-1140.79
14	B2	16	51931.1	7464.44	9092.27	99449	-1367.14																14	B2	16	141590	48381.3	17255	134820	-203.94
15	B3	16	51221.3	6165.49	9665.83	104027	-1040.97																15	B3	16	112322	10479.1	14518.5	123821	339.564
16	B4	16	566592	62782.2	11913	110937	-272.932																16	B4	16	47926.5	4351.75	13535.5	121632	219.025
17	B5	16	556192	58207.4	11026.7	96477.2	479.042																17	B5	16	84644.8	5478.85	13935.9	113563	699.711
18	B6	16	535804	54644.9	11267.2	94331.9	321.145																18	B6	16	43414.1	4068.55	13824.6	113659	579.026
19	B7	16	120851	13568.4	13301.1	109340	-1329.71																19	B7	16	796300	81600.7	16418.6	121638	-750.722
20	B8	16	125476	12860.7	11272.9	98753.5	-314.658																20	B8	16	807355	83834.8	15412.5	120766	382.999
21	B9	16	128300	14113.2	11170.1	106183	92.8047																21	B9	16	824898	90477.3	16268.8	129049	80.3091
22	B10	16	46242.8	6086.75	9159.56	88891.8	-413.162																22	B10	16	663962	81289	13820.6	115786	371.51
23	B11	16	39170.8	5809.65	9236.72	102264	-1337.72																23	B11	16	628457	85044.8	12395.7	111563	-514.721
24	B12	16	38559.7	7420.61	7559.83	93926.8	-436.188																24	B12	16	647883	100031	11094.8	113267	-195.933
25	C1	16	53417.6	7542.35	8296.1	102405	-1777.63																25	C1	16	61116	5860.88	12465.8	128334	-998.306
26	C2	16	53955.3	7636.7	9291.47	99468.7	632.6																26	C2	16	58903.8	6300.63	13486.4	124479	3580.43
27	C3	16	51842.4	6466.38	9082.9	94026.5	-1674.43																27	C3	16	52691	5686.2	13117	111713	-393.922
28	C4	16	40774	4470.56	10639	99678.3	39.8838																28	C4	16	35159.4	2622.94	1455.26	2203.73	1443.1
29	C5	16	53272.9	5253.39	10434.1	94054.9	350.227																29	C5	16	29578.4	2152.34	1434.46	2176.67	973.247
30	C6	16	-13195.8	4180.25	10149.6	93061.4	-888.423																30	C6	16	-25246.2	2323.7	1001.81	1617.86	710.163
31	C7	16	49032.1	5065	10899.8	91078.1	-992.025																31	C7	16	27409.2	2460.77	1966.47	1614.87	8.16292
32	C8	16	43518.6	5659.46	11322.2	96477.8	-1035.16																32	C8	16	31590.2	2418.72	1848.22	2088.21	386.785
33	C9	16	11814.9	1824.66	9230.62	88460.7	-1250.4																33	C9	16	25553.9	2330.22	1070.65	1581.35	-609.843
34	C10	16	14256.6	1743.79	9161.8	91686.4	-1166.25																34	C10	16	32496.6	2424.5	1504.65	1732.18	1005.96
35	C11	16	14316.6	2211.77	8321.41	92744.6	-1102.06																35	C11	16	49400	4539.59	2720.24	3636.02	2877.28
36	C12	16	11820.8	2640.74	6803.32	91329.1	-659.832																36	C12	16	37719.8	3600	1571.39	2833.08	2845.01
37	D1	16	410976	58280.1	6668.4	75755.7	937.282																37	D1	16	124547	14703.3	11522.5	128095	1684.76
38	D2	16	476911	59565.1	11716.3	119598	381.075																38	D2	16	159991	18122.5	12588.1	118292	2134.08
39	D3	16	506410	56924.6	10075.6	94232	131.042																39	D3	16	135813	14778	12294.7	105171	539.657
40	D4	16	13348.9	1604.67	10165.2	88638.6	-100.683																40	D4	16	44346.5	3755.41	13504.6	109624	588.517
41	D5	16	14950.1	1757.99	10050.7	88288.1	1744.47																41	D5	16	63021.8	14914.7	14729.7	103936	779.436
42	D6	16	15161.2	1589.21	10293.3	88428.8	-535.542																42	D6	16	42936.7	5834.57	13989.4	103139	353.887
43	D7	16	11913.6	1368.65	10097.9	86043.4	-1229.91																43	D7	16	37512.4	3500.19	13665.9	104298	-708.912
44	D8	16	15579	1492.32	10333.9	88583.2	-605.438																44	D8	16	50689.6	5374.83	14081.8	104812	2238.93
45	D9	16	13298.7	1854.23	10850.2	93892.3	-939.512																45	D9	16	40386	3772.64	13201.3	106485	-282.403
46	D10	16	23315.3	4333.67	8992.68	88841	213.744																46	D10	16	46628.5	4521.05	13767.2	110457	1295.07
47	D11	16	31011.3	8319.8	10191.9	101746	-1815																47	D11	16	47090.5	4692.15	11991.8	116220	-811.461
48	D12	16	12542.2	2720.18	7967.55	95257.8	-1448.08																48	D12	16	41308.3	4175.91	10270	107839	-888.224
49	E1	16	412538	57596.2	9655.79	115976	-140.861																49	E1	16	784668	110396	14063.2	141490	1305.89
50	E2	16	405530	50270	10043.5	109107	30.6831																50	E2	16	772421	95444.7	14658.2	126790	2672.31
51	E3	16	508247	56176.1	10534.1	102500	879.554																51	E3	16	710395	79396.9	14357.5	117465	1591.9
52	E4	16	87741.1	8996.15	10241	90573.6	-147.081																52	E4	16	63190.8	6570.68	13499	104281	346.763
53	E5	16	70371.4	7446.89	10245.4	84724.6	368.441																53	E5	16	48844.6	8464.55	13082.3	95777	877.82
54	E6	16	75706.2	7812.34	10387	83757.5	-296.312																54	E6	16	44036	4940.38	13221.3	98668.4	192.293
55	E7	16	17419.1	1888.02	10246.8	87652.1	903.056																55	E7	16	616832	61315	14638.6	104463	1483.56
56	E8	16	122564	21071.7	10914.4	85348.3	-921.079																56	E8	16	589631	59170.2	13840.3	99722.1	157.727
57	E9	16	14406.5	1470.11	10439.3	92023	-536.657																57	E9	16	632112	65482	14193.2	110804	602.395
58	E10	16	16450	2451.07	9536.4	92350.8	-23.9485																58	E10	16	53040.9	6349.65	12253.6	106471	50.5742
59	E11	16	16084.9	1988.33	10259.8	102465	-85.2172																59	E11	16	67729.2	7956.07	13335.4	115942	847.617
60	E12	16	15393.4	2442.84	8215.04	97617.2	-1000.74																60	E12	16	79340.9	12836.9	11414.9	120390	-226.315
61	F1	16	21118.8	3345.54	10297.7	127339	-1361.2																61	F1	16	110442	13617.1	15956.3	157317	-24.7295
62	F2	16	22122.5	3398.05	10254.7	112417	-1494.37																62	F2	16	90259.9	10024.4	13810.2	132455	-421.936
63	F3	16	19978.2	3347.76	10518.6	101133	-1551.52																63	F3	16	94799.6	10409.3	14685.5	121259	-660.177
64	F4	16	17846.6	1903.07	12051.3	108053	407.954																64	F4	16	69539.8	12840.1	15533.6	115475	1196.68
65	F5	16	27487.7	3136.11	10204.9	92118.9	-12.4438																65	F5	16	56121	5620.28	13491.2	105522	623.984
66	F6	16	25095.3	2624.99	11046.7	95069.8	-444.421																66	F6	16	58943.1	5605.14	14321.7	110950	51.9469
67	F7	16	25648.5	3162.76	10801.2	90008.9	-820.397																67	F7	16	671583	66226.6	15110	106972	2991.42
68	F8	16	29667.2	3632.4	12302.3	98894.4	-431.88																68	F8	16	789018	78736.4	16248.9	118520	199.741
69	F9	16	32015.9	3623.04	11099.3	101015	898.098																69	F9	16	756873	79512.9	15860.2	120880	2665.47
70	F10	16	519822	59320.1	10305.4	100457	-1305.7																70	F10	16	718833	82555.6	14265.7	111756	-376.6
71	F11	16	572482	71298	10346.2	103856	733.904																71	F11	16	737675	93330.5	13626.1	120511	1501.12
72	F12	16	569335	80639.4	9979.85	107165	-2113.51																72	F12	16	739205	105749	13531.1	125634	-814.344
73	G1	16	38285.5	5668.97	10313.8	131742	-2367.9																73	G1	16	246764	33804.4	15868.9	162903	-683.717
74	G2	16	32058.4	4271.89	10197.6	118107	-1540.26																74	G2	16	200618	27254.6	15979.5	156223	302.063
75	G3	16	30049.9	4315.65	11253.6	113526	-1399.81																75	G3	16	196901	24427.2	15991.5	135683	-274.588
76	G4	16	33211.1	4588.52	11030.9	109328	-2168.95																76	G4	16	116288	24932.1	17665	141375	-1257.09
77	G5	16	27278.3	3192.07	10177.3	92619.1	-785.259																77	G5	16	54665.4	5728.21	13709.2	109504	985.143
78	G6	16	27386.9	4584.98	11431.4	98901	-1264.41																78	G6	16	72849.5	13153.9	15803.7	111648	2022.57
79	G7	16	29188.2	3401.94	10707.9	92553.5	240.931																79	G7	16	74345.5	8049.33	13298.2	106738	1225.67
80	G8	16	29576.4	3689.1	11177.3	100616	-1870.86																80	G8	16	80739.2	8795.44	15006.5	116098	590.598
81	G9	16	30029.6	3639.27	11204	101427	43.8125																81	G9	16	83059.7	10262.8	15415.5	123830	1837.78
82	G10	16	562752	67198.6	10731.2	97968.9	-478.979																82	G10	16	89533.5	9730.02	25151.6	232049	646.313
83	G11	16	551758	72667	9549.72	98157.6	-1568.59																83	G11	16	66531	7944.39	13138.8	121221	323.854
84	G12	16	700509	102602	11289.8	121067	-2658.91																84	G12	16	77103	13685.9	15108.5	150238	-1417.77
85	H1	16	130681	21697.4	9887.32	128741	-350.913																85	H1	16	78367.4	11251.6	12435.6	149926	373.247
86	H2	16	123849	18244.9	9404.94	120447	-1199.99																86	H2	16	77410.2	10516.4	13669.6	159517	-477.634
87	H3	16	107592	14115.1	9605.12	113933	-1743.48																87	H3	16	69704.6	11696.6	13698.1	131956	-218.21
88	H4	16	30302.7	4957.38	10078.8	110738	-98.7012																88	H4	16	37307.4	3546.33	1226.99	2095.6	1285.91
89	H5	16	38293.5	5760.86	11520.6	109586	-1099.04																89	H5	16	44124	4604.75	2356.64	3032.8	1066.99
90	H6	16	37501.2	5111.08	12152.6	116662	-1074.91																90	H6	16	139587	11356.3	5689.3	5398.15	2928.2
91	H7	16	29866.8	4588.51	11813.9	110290	-2104.91																91	H7	16	30422.8	3049.97	1726.36	2318.85	1111.84
92	H8	16	32551.1	4764.42	11986.7	116694	-485.42																92	H8	16	39080.2	2980.54	1809.91	2282.99	2479.13
93	H9	16	29042.5	4244.29	10241.6	104875	-871.117																93	H9	16	44019.1	4104.74	2227.17	2151.63	1885.62
94	H10	16	27921	4070.04	9843.95	105244	1975.37																94	H10	16	61473.9	7649.92	14672.3	128836	2117.8
95	H11	16	32064	5088.04	9460.1	115477	-1287.51																95	H11	16	65251	8929.94	11713.1	139059	-898.263
96	H12	16	32676.2	5488.1	9421.76	118768	-1626.68																96	H12	16	88165.9	17900.3	12645.1	139873	-509.891
1	A1	17	59111.9	9415.02	8806.75	115528	-1148.62																1	A1	17	777559	126755	13693.9	141806	-354.076
2	A2	17	62759.2	8844.51	8843.65	114981	-556.931																2	A2	17	809716	115819	13423.3	143021	-32.7257
3	A3	17	62420.1	7866.67	9951.9	113152	-1826.12																3	A3	17	775737	100897	14731.7	136552	-541.731
4	A4	17	611575	73709	11635.4	115110	-264.718																4	A4	17	50679.5	4343.15	14171.7	131987	768.085
5	A5	17	605184	69372.1	12010.7	110042	-780.436																5	A5	17	58081.4	5080.69	15136.8	130253	121.003
6	A6	17	603229	66688.3	11618.5	108002	-1060.49																6	A6	17	62585.7	4698.91	14806.7	129572	-660.882
7	A7	17	49529	6803.74	11005.3	106117	-1122.92																7	A7	17	747505	83013.4	15794.1	132530	-689.169
8	A8	17	52276.1	6576.64	12002.2	113583	-1415.03																8	A8	17	807422	90762.5	16878.4	136390	-588.227
9	A9	17	43468	6193.21	11154.6	111851	-3286.43																9	A9	17	774448	92025.5	15637	133999	-1873.11
10	A10	17	49910.8	6989.05	9888.74	109212	-1703.22																10	A10	17	44459.3	4499.03	13325	134036	-1184.2
11	A11	17	53469.2	8214.4	8849.6	108337	-1917.02																11	A11	17	49545.6	5564.25	12441	140940	-1200.69
12	A12	17	57996.9	9695.91	8603.26	115116	-1859.93																12	A12	17	56057.3	6177.36	11712.1	139594	-1338.28
13	B1	17	59205.2	8569.51	8952.2	122919	-1933.59																13	B1	17	70148.1	6764.86	13099.9	145295	-1169.59
14	B2	17	51163.5	6958.83	8399.51	99417.2	-1540.52																14	B2	17	142208	48455.7	17216.6	134830	-379.043
15	B3	17	50849.6	6234.13	9790.48	103930	-1173.93																15	B3	17	112776	9925.05	14673.2	124169	-117.106
16	B4	17	565053	62678.5	11543.7	110973	-195.727																16	B4	17	47746.6	4593.71	13722.9	122162	304.374
17	B5	17	554583	58039.7	10876.1	96669.1	376.588																17	B5	17	83446.4	5349.29	13907.1	113469	807.139
18	B6	17	534742	54480.8	11241.7	94130.4	-116.26																18	B6	17	43387	4023.22	13870.7	113841	542.426
19	B7	17	120250	13117	12913.7	109121	-1248.27																19	B7	17	796472	81485.2	16469.1	122065	-812.493
20	B8	17	125195	12947.9	11131.5	98583.1	-705.11																20	B8	17	805356	84029.8	15257.8	120631	-111.432
21	B9	17	128194	14089.2	11311.6	106141	-207.483																21	B9	17	824258	90463.2	15702.3	128523	-4.53883
22	B10	17	46090.9	5959.45	8583.8	88608.9	-1046.32																22	B10	17	665302	82152.8	14012.1	115799	316.117
23	B11	17	38332.4	4806.16	8917.13	102332	-1595.79																23	B11	17	629438	85243.2	11801.2	111540	-270.006
24	B12	17	39958	8584.2	7939.01	94017.9	-931.968																24	B12	17	649255	100873	10903	113530	-263.367
25	C1	17	52389.6	8112.98	8458.38	101963	-1628.7																25	C1	17	60970.8	6322.01	11951.5	128215	-239.601
26	C2	17	53383.5	7631.66	9424.62	99274.1	755.819																26	C2	17	58700.9	6233.21	13220.4	125040	3535.49
27	C3	17	50465.3	6776.46	9135.1	94186.7	-1942.22																27	C3	17	52757.8	6189.63	12992.6	111724	-278.743
28	C4	17	40278.3	4823.35	10854.4	99762.6	-291.773																28	C4	17	34521.2	2929.43	1747.15	2329.57	1326.94
29	C5	17	52923.4	5804.8	10130.3	93781.6	251.347																29	C5	17	29692.7	2092.7	1116.97	1990.74	1143.92
30	C6	17	-14820.3	4146.86	10330.6	93049	-800.277																30	C6	17	-24968.1	2489.89	1134.17	1672.06	773.92
31	C7	17	48574.7	5067.23	10938	91011.7	-1152.67																31	C7	17	27581.9	2447	1765.15	1777.98	150.533
32	C8	17	43314.4	5679.38	11511.3	96378.2	-1144.45																32	C8	17	31316.4	2736.49	1945.61	2217.77	610.827
33	C9	17	11262.2	2117.71	9216.57	88527.9	-963.687																33	C9	17	25039.9	2404.72	1168.2	1773.99	-428.107
34	C10	17	13553	2101.6	9252.18	92059	-1409.83																34	C10	17	31475	2475.22	1719.4	1685.46	542.646
35	C11	17	12893	2316.06	8237.18	92633.7	-1058.93																35	C11	17	49316.6	4509.65	2502.14	3585.58	2515.31
36	C12	17	11579	2460.17	6991.7	91348.4	-468.453																36	C12	17	37813.2	3896.98	1483.15	2513.67	3078.36
37	D1	17	413379	58705.1	6927.61	76057.7	417.52																37	D1	17	125168	15079.3	11863.5	128135	1739.37
38	D2	17	478342	60498.1	11797.6	119716	239.713																38	D2	17	160128	18478.5	12392.2	118011	1912.12
39	D3	17	506577	56781.8	10405.2	94732.7	-127.543																39	D3	17	136929	14564.5	12393.9	105191	1004.84
40	D4	17	13730.9	1315.63	10158.6	88909.6	-109.361																40	D4	17	45095.6	3402.69	13453.7	110174	776.686
41	D5	17	15862.2	1682.21	10023.9	88308.2	2034.51																41	D5	17	62507.9	15073.9	14800.2	103864	896.352
42	D6	17	16217.1	1801.87	10412.4	88135.6	-314.716																42	D6	17	43867.2	5580.55	13745.9	103003	198.863
43	D7	17	12491.6	1494.46	10177.5	85860.5	-1325.1																43	D7	17	37747.4	3228.83	13246.1	104534	-810.492
44	D8	17	16657.4	1682.07	10329.4	88706.5	-558.769																44	D8	17	51126.8	5477.85	14248.8	104541	2379.26
45	D9	17	13308.3	1469.08	10740.6	94228.1	-1047.23																45	D9	17	40469.7	3782.93	13445.9	106466	-57.1638
46	D10	17	23040.3	4227.25	9051.46	88523.7	-54.304																46	D10	17	47527.6	4485.5	13480.4	110626	1024.33
47	D11	17	34220.5	9433.64	10182.1	102407	-1628.25																47	D11	17	47710.3	4350.42	12342.3	116004	-611.69
48	D12	17	13407	2380.72	7737.41	95081.3	-1709.7																48	D12	17	40998.8	4368.33	9903.72	108193	-665.144
49	E1	17	414032	58396	9390.27	116275	353.404																49	E1	17	786347	110367	14057.8	141854	966.531
50	E2	17	408269	50793.9	9934.92	108225	-201.433																50	E2	17	774057	96055.3	14512.2	126693	2343.81
51	E3	17	509843	56254.2	10773.3	102004	1032.68																51	E3	17	713215	79451.4	14066.2	117159	2071.26
52	E4	17	87471.8	9055.25	10438.1	90536.9	-250.885																52	E4	17	64497.1	6711.87	13411.1	104513	492.253
53	E5	17	71346.3	7409.54	9866.47	85022	113.444																53	E5	17	49936.1	8359.21	13177.7	95496.7	529.993
54	E6	17	76232.7	7900.5	10093.6	83891	-158.215																54	E6	17	46324.5	4928.41	13285.2	98883.4	138.744
55	E7	17	17516.6	1680.62	10154.5	88029.4	804.603																55	E7	17	617025	61316.9	14364.9	104686	1344.79
56	E8	17	124289	21104.1	10951.9	85357.8	-656.006																56	E8	17	590777	58959.4	13393	100005	301.869
57	E9	17	14412.7	2080.97	10074.1	92480.3	-151.762																57	E9	17	632331	65576.1	13926.6	111097	280.917
58	E10	17	16284.3	2405.44	9476.05	92504.2	-132.394																58	E10	17	55200.8	6269.23	12258.8	106295	147.408
59	E11	17	16987.4	2364.53	9664.93	102561	-185.177																59	E11	17	69706.6	7984.79	13382.4	116403	1162.75
60	E12	17	15651.6	2925.23	7837.85	97845.6	-743.754																60	E12	17	77979.5	12800.8	11635.2	121666	-339.323
61	F1	17	22821	3417.51	10512.7	127276	-1384.81																61	F1	17	128429	16505	15798	157622	795.811
62	F2	17	21700.7	3374.79	9664.31	112336	-1314.29																62	F2	17	107456	12398.7	14030.9	132314	-424.252
63	F3	17	20197.8	3580.63	10705.4	101493	-1241.32																63	F3	17	111300	11620.1	14470.6	120810	-646.272
64	F4	17	17343.9	2057.3	11937	107985	526.292																64	F4	17	72448.1	13019.5	15424.6	115155	1053.95
65	F5	17	27874.7	3435.47	10148	91912.6	-5.99036																65	F5	17	58631.4	6140.31	13759.3	105262	857.819
66	F6	17	24828.7	2816.51	10923.1	95051.5	-573.51																66	F6	17	61283.7	6157.74	14289.7	110955	-101.698
67	F7	17	26041.5	3108.64	10634.7	89886.1	-691.079																67	F7	17	673224	66379.6	14845.7	106773	3024.65
68	F8	17	29035.8	3817.61	12172	99086.2	-636.899																68	F8	17	789281	78968	16290.2	119175	199.515
69	F9	17	31842.4	3591.41	11340.4	100502	880.546																69	F9	17	757254	79741.3	16034.7	120810	2686.84
70	F10	17	519500	59539.7	10553.3	99602.8	-1141.46																70	F10	17	720051	82352	14283.7	111818	-368.848
71	F11	17	572468	71337.9	10282.2	103414	346.574																71	F11	17	739554	93273.6	14200.4	120942	1528.19
72	F12	17	569541	81120.8	9726.68	106181	-1939.55																72	F12	17	741776	106111	13933.9	125758	-760.745
73	G1	17	39058.6	5973.45	11190.6	132545	-1995.46																73	G1	17	257733	35737	15788.9	163249	-617.292
74	G2	17	33048	3880.46	9835.83	118304	-1733.13																74	G2	17	209821	28466.3	16337.9	155964	-280.44
75	G3	17	30365.5	4137.53	10867.5	113173	-1158.53																75	G3	17	206813	25483.1	15816.3	135672	-172.967
76	G4	17	33089.1	4568.13	10948.5	109519	-2316.74																76	G4	17	115344	25250.6	17815.4	141546	-1084.16
77	G5	17	26604.4	3368.18	10374.9	92420.6	-496.341																77	G5	17	55182.6	6014.44	13885	109515	574.165
78	G6	17	27229.7	4388.51	11160.9	99136.4	-673.777																78	G6	17	72407.5	13247.8	15579.6	111908	2011.3
79	G7	17	29188.6	3776.54	10318.9	92870.9	199.202																79	G7	17	89039.6	9633.58	13968.5	105946	951.266
80	G8	17	30312.8	3658.63	11095.7	100827	-1655.16																80	G8	17	96370.4	9970.75	15033.8	116496	27.4316
81	G9	17	30045.9	3470.52	11032.9	101074	213.107																81	G9	17	98719.7	11990.4	15676	123541	1810.1
82	G10	17	563778	67354.4	10580.8	98110.2	-717.436																82	G10	17	103118	10769.5	24936.8	231841	447.117
83	G11	17	551258	71790.8	9686.61	98096.4	-1135.55																83	G11	17	69706.4	8229.33	12989.4	121209	42.6814
84	G12	17	700078	102334	11183.2	120953	-2856.85																84	G12	17	80409.5	14848.4	15230	150263	-2254
85	H1	17	131255	22023.3	9883.52	128192	-822.366																85	H1	17	78512	10598.2	12548	149842	502.309
86	H2	17	124862	18934.2	9451.2	119728	-1139.26																86	H2	17	77404.5	10286.3	13826.1	160215	-24.2757
87	H3	17	108162	14055.5	9661.72	114064	-1545.2																87	H3	17	70095	12437.1	13966.9	132274	-467.735
88	H4	17	31163.8	4840.17	10013.7	110553	-419.383																88	H4	17	37335.1	3379.91	655.122	2353.72	1524.83
89	H5	17	39178	5821.02	11624.5	109284	-1077.96																89	H5	17	44861.6	5039.47	2436.19	2947.33	1137.4
90	H6	17	37082.7	4798.82	11946.6	116631	-928.51																90	H6	17	139021	11527.2	5895.21	5581.07	3031.46
91	H7	17	31605.1	4801.77	11844.4	110237	-2171.62																91	H7	17	30995.4	2710.26	1621.16	2139.75	942.419
92	H8	17	33310.3	4724.27	12389.8	116592	-874.615																92	H8	17	38539.1	2988.9	1836.88	2162.08	2611.52
93	H9	17	30688.7	4476.21	9735.25	104815	-517.031																93	H9	17	44556.8	3950.93	2296.79	2359.98	1968.44
94	H10	17	28869.5	3972.62	9357.73	105117	1963.45																94	H10	17	63274.1	8604.1	15292.2	128831	2301.31
95	H11	17	32772.3	6338.09	9018.51	115240	-900.489																95	H11	17	67781.9	9582.25	12046.2	138974	-936.375
96	H12	17	33006.6	6400.36	9081.78	118661	-1492.63																96	H12	17	89130.1	18918.4	12952.6	140225	-408.02
1	A1	18	57478.6	8456.59	8835.21	115685	-919.265																1	A1	18	778377	126834	13275.4	142120	-574.024
2	A2	18	62505.3	8199.16	9026.69	114595	-727.754																2	A2	18	810020	116031	13234.7	143413	313.848
3	A3	18	62958.8	7538.35	10107.6	112661	-1582.79																3	A3	18	777078	100800	14590.5	136672	-422.887
4	A4	18	611289	73490.2	11278.9	115015	-358.14																4	A4	18	51908.1	4490.19	14309.9	132633	982.342
5	A5	18	605166	69113.9	11981.3	109929	-886.458																5	A5	18	58089.9	5051.85	14745.6	130442	393.149
6	A6	18	604491	66211	11996	108190	-1170.28																6	A6	18	63956.9	4850.8	15024	129770	-672.289
7	A7	18	49713	6526.79	10876.5	105819	-1241.47																7	A7	18	748508	82931.9	16092.9	132417	-754.717
8	A8	18	51384.1	6343.75	12390.8	113027	-1301.29																8	A8	18	807173	90912.4	16368.3	136304	-754.068
9	A9	18	43304.2	6072.98	10710.4	111490	-2698.14																9	A9	18	775894	91855.8	15607.2	133200	-1718.57
10	A10	18	49275.2	6766.28	9807.21	109020	-1843.88																10	A10	18	44157.7	4146.47	13066	133914	-1030.76
11	A11	18	53701.8	8358.28	8501.9	108425	-2264.1																11	A11	18	50086.8	4951.51	12824.5	141032	-974.887
12	A12	18	55174.2	8906.41	8425.97	115063	-1862.75																12	A12	18	56240.5	6073.02	11846.6	139169	-1861.53
13	B1	18	60204.9	9354.14	9339.74	122688	-1997.44																13	B1	18	69806.4	7359	12729.8	145763	-1236
14	B2	18	50537.2	6918.97	8923.04	99462	-1251.24																14	B2	18	142538	48818.6	17290.9	134925	-204.839
15	B3	18	51502.9	6261.68	10352.1	104290	-1376.26																15	B3	18	113278	9977.7	14840.6	123804	42.5958
16	B4	18	565947	62924.9	11875.2	110991	-370.295																16	B4	18	48371.7	4673.67	13941.2	121631	308.001
17	B5	18	554640	58468.9	10786.7	96630.6	462.974																17	B5	18	84505.3	5707.36	14163.9	113702	783.935
18	B6	18	535212	54810.1	10995.1	94671.7	-230.601																18	B6	18	43728.5	3964.56	13741	113385	366.184
19	B7	18	121023	13356.1	13356	109121	-1652.01																19	B7	18	795531	81138.7	16468.2	121725	-935.96
20	B8	18	125644	13141.4	11206.2	98599.1	-403.255																20	B8	18	805453	83813.6	15490.5	120807	79.211
21	B9	18	129181	14436.9	11489	106006	-331.015																21	B9	18	823650	90443.9	15493.2	128610	453.671
22	B10	18	45551.8	6033.3	8951.38	88445.9	-858.327																22	B10	18	665771	82158.8	14023	115748	591.109
23	B11	18	39008.7	4922.68	8930.45	102134	-1630.72																23	B11	18	632130	85917.7	12075.9	111398	-403.472
24	B12	18	40479.1	8326.75	7815.24	94404	-674.669																24	B12	18	649454	100535	11066.3	113463	-309.196
25	C1	18	53405.9	7382.7	8765.4	102386	-1529.72																25	C1	18	61156.2	5800.56	12095	128122	-395.871
26	C2	18	53505	7211.69	9760.44	99229.2	596.676																26	C2	18	58755	5939.57	13241	124317	3556.24
27	C3	18	50640.8	6448.99	9167.66	94573.7	-1178.32																27	C3	18	52511.5	5510.03	12531.3	111799	-485.459
28	C4	18	40322.2	4567.02	10823.8	99916.3	-118.382																28	C4	18	34780.9	2607.82	1607.49	2027.39	1231.67
29	C5	18	53653.3	5384.83	10758.1	93620	8.07271																29	C5	18	30097.2	2059.87	1332.58	2099.16	1208.64
30	C6	18	-14187.7	3995.51	10595.7	93251.5	-589.108																30	C6	18	-25561.3	2343.89	1172.39	1586.07	703.776
31	C7	18	48572.1	5140.65	11043.2	91288.6	-1180.29																31	C7	18	27474.6	2317.29	1565.62	1824.02	213.878
32	C8	18	42989.8	5367.82	11708.4	96961.4	-1055.07																32	C8	18	32423.3	2409.86	1860.61	2177.16	343.583
33	C9	18	12000.5	1778.63	9424.19	88498.8	-1152.11																33	C9	18	25838.4	2247.34	1236.13	1879.71	-55.1089
34	C10	18	14323.1	1768.91	9385.48	92030	-1409.52																34	C10	18	31881.5	2483.23	1444.16	1676.57	696.702
35	C11	18	13077.2	2127.44	8440.87	92899.2	-1153.13																35	C11	18	49674.7	4364.68	2428.25	3290.93	2554.21
36	C12	18	11407.2	2911.86	7421.35	91435.1	-661.915																36	C12	18	37663.4	3664.02	1385.75	2462.59	2953.68
37	D1	18	414184	58894.8	6789.78	75625	768.468																37	D1	18	125195	14934.1	11870.8	127548	1671.79
38	D2	18	479291	60541.9	11952.2	119877	585.866																38	D2	18	160898	18403.7	12715.2	118531	1817.86
39	D3	18	507912	57118	10247.5	94557.8	-61.8643																39	D3	18	137764	14381.2	12496	105049	514.096
40	D4	18	14027.3	1245.82	9870.32	88919.5	-292.495																40	D4	18	44997.9	3597.46	13899.6	109695	528.23
41	D5	18	15720.5	1623.86	10121.6	88030.3	1956.72																41	D5	18	62244.1	15369.4	14590.5	103523	769.174
42	D6	18	15047.1	1846.75	10438	88366.7	-418.731																42	D6	18	43050.4	5860.93	13943.3	102710	-57.6337
43	D7	18	12788	1265.67	9923.78	85995.4	-1056.65																43	D7	18	37599	3190.27	13602.3	104241	-814.666
44	D8	18	16167.2	1623.93	10562.3	88208.1	-794.388																44	D8	18	50861.9	5706.85	14235.9	104113	2286.93
45	D9	18	12572.6	1757.17	10757.6	93952	-666.99																45	D9	18	41351.3	4221.18	13624.4	106114	-352.482
46	D10	18	21355	3763.48	8729.94	88569.5	34.1973																46	D10	18	46219	4623.69	13803.9	109997	1138.77
47	D11	18	34883.5	9385.58	10367.3	102421	-1715.71																47	D11	18	48013.9	4582.68	11976.3	116042	-364.091
48	D12	18	13240.1	2001.7	7879.82	95161.1	-1500.16																48	D12	18	42017	4154.23	10051.8	107935	-875.451
49	E1	18	415389	59053.6	9756.72	115802	-54.1358																49	E1	18	788154	110507	13899.3	141391	648.491
50	E2	18	408790	51208	9971.95	109178	-314.707																50	E2	18	777520	96117.2	14539.3	126896	2147.14
51	E3	18	510556	56632.6	10373.6	102613	776.373																51	E3	18	715405	79668.2	14260.4	117226	1501.17
52	E4	18	88759.1	9187.81	10210.6	90638.5	-219.649																52	E4	18	69385.4	7135.59	13548.6	104366	282.482
53	E5	18	71619.9	7657.69	10103	85109.8	155.285																53	E5	18	52892.2	8903.16	12969	95837.7	345.499
54	E6	18	76457.3	7982.07	10123.5	83622.1	-349.178																54	E6	18	49664	5390.94	12851.9	98548.4	127.796
55	E7	18	17676.5	1965.6	9952.65	87776.9	664.302																55	E7	18	618962	61405.5	14552.4	104491	1308.3
56	E8	18	126155	21561.2	10848	85809.6	-593.478																56	E8	18	592376	59075.4	13622	99874.7	-39.4229
57	E9	18	14358.4	1706.44	10027.5	92667.4	-396.842																57	E9	18	635025	65792.9	13885.8	110694	14.0615
58	E10	18	16382.2	2676.65	9522.03	92830.6	-269.285																58	E10	18	58447.7	6821.7	12482	106358	8.26912
59	E11	18	17385.3	2589.66	9778.27	102722	-57.8797																59	E11	18	73300.7	8424.45	13033	116478	533.112
60	E12	18	15421.7	2673.52	7546.07	97932.5	-695.029																60	E12	18	80745.5	12754.6	11360.6	122315	-240.504
61	F1	18	22693.7	3125.43	10567.6	126876	-974.392																61	F1	18	166292	20683.3	15981.2	157897	431.039
62	F2	18	20813.1	3404.05	10155	111986	-1339.88																62	F2	18	140209	15960.4	13839	132542	-533.565
63	F3	18	20480.8	3887	10582	101349	-1454.64																63	F3	18	138604	14520.5	14672.5	121688	-528.163
64	F4	18	17423.7	1904.73	12131.6	107569	523.034																64	F4	18	76598	13425.1	15908.2	115639	1249.92
65	F5	18	28138.2	3677.41	10163.5	91856.9	-195.402																65	F5	18	63587.4	6259.83	13198.8	105299	605.965
66	F6	18	25477.5	2780.74	11349.6	94912.9	-475.721																66	F6	18	65433.7	6322.75	14404.3	110901	418.997
67	F7	18	25556.1	3231.03	10626.9	90236.3	-587.133																67	F7	18	675217	66510.5	15111.3	106705	3090.59
68	F8	18	29843.8	3768.53	12515.9	99025.1	-832.055																68	F8	18	792128	79072.6	16234.6	118947	186.298
69	F9	18	31860.3	3805.22	11299.4	101149	947.855																69	F9	18	759034	79730.2	16057.5	121291	2343.84
70	F10	18	522573	59670.3	10538.8	100236	-808.184																70	F10	18	722155	83268.8	14381.5	112166	-378.106
71	F11	18	574599	71640.4	10487.5	103971	307.425																71	F11	18	742887	93634.3	13865.5	120932	825.42
72	F12	18	570425	81306.3	9779.32	106582	-1894.91																72	F12	18	743452	106948	13348.2	126251	-960.439
73	G1	18	37979.6	5736.81	10552	132704	-1793.12																73	G1	18	279380	38808.8	16066.9	162179	-757.277
74	G2	18	33547	4107.37	10105.7	118395	-1409.4																74	G2	18	227792	30246.1	15628.6	155471	99.6656
75	G3	18	29666	4300.53	11136.1	113105	-1486.1																75	G3	18	224275	26966.9	15961.1	135491	-276.134
76	G4	18	33278.9	4732.06	11063	109261	-1890.75																76	G4	18	117663	25195.6	17676.4	141566	-686.685
77	G5	18	26939.9	3414.88	10340.6	92618.1	-676.505																77	G5	18	56434.4	5792.86	13820.3	109351	598.575
78	G6	18	28073.7	4683.35	11220.5	99260.9	-985.307																78	G6	18	73075.3	12950.4	15715	111779	2208.56
79	G7	18	29239.6	3919.62	10487	92544.9	-15.797																79	G7	18	116226	11418.6	13734	106514	1033.73
80	G8	18	30447	3609.11	11176.4	100425	-1597.45																80	G8	18	125112	12500	14999.8	116228	64.714
81	G9	18	30202	3489.95	10699.4	101276	202.377																81	G9	18	128085	14497.2	15286.1	123983	1440.32
82	G10	18	561917	67117.8	10345.8	98316.2	-389.046																82	G10	18	129887	13749.6	24828.7	231811	999.352
83	G11	18	551722	71692.9	9115.3	97740	-959.648																83	G11	18	75236	9090.32	13541.1	121160	289.986
84	G12	18	698589	102440	10882.3	121508	-2159.55																84	G12	18	87723.4	15400.8	15269.6	150545	-1518.97
85	H1	18	130642	22346.8	9589.86	128446	-423.357																85	H1	18	77332.9	10821.4	12283.3	150157	67.4353
86	H2	18	125498	18864.5	9343.18	119956	-1326.99																86	H2	18	76464.4	10080.7	14006.6	159841	-440.332
87	H3	18	108886	14269.5	9820.07	113778	-1804.02																87	H3	18	68691.7	11777	13689.2	131737	-260.519
88	H4	18	31013.5	4559.86	9819.85	110525	-277.558																88	H4	18	36169.5	3259.2	1032.27	2438.22	1609.29
89	H5	18	38709.7	5817.67	11799.6	109799	-905.457																89	H5	18	43003.5	4684.35	2831.59	3039.39	1003.19
90	H6	18	37383.2	4763.72	11936.1	116048	-782.465																90	H6	18	137948	11279.1	5788.74	5153.5	2870.79
91	H7	18	30455.8	3895.96	11422.6	110222	-1846.86																91	H7	18	29420.1	2867.09	2111.33	2068.09	995.925
92	H8	18	32639.9	4157.65	11858.1	116304	-825.069																92	H8	18	38362.2	3069.41	2259.49	2171.2	2485.92
93	H9	18	30658.4	4242.81	10026.5	104607	-1069.59																93	H9	18	43323.7	3826.16	1966.93	2781.58	1841.24
94	H10	18	28034.1	3884.64	9522.75	105389	1435.59																94	H10	18	65695.5	8278.72	15280.9	128556	2031.74
95	H11	18	32452.2	5566.36	8946.47	115254	-1351.38																95	H11	18	70737.3	9199.48	11928.3	138612	-586.6
96	H12	18	34033.3	5880.18	8883.73	118539	-1233.18																96	H12	18	93165.5	19031.9	13269.1	139700	-481.013
1	A1	19	57996.6	8774.76	9025.15	115643	-1083.29																1	A1	19	777733	126871	13121.4	142353	-783.802
2	A2	19	61591.4	8582.83	8794.09	115079	-368.917																2	A2	19	809330	116762	13624.4	142895	197.101
3	A3	19	62905.4	7787.08	10304.2	113333	-1703.07																3	A3	19	777048	101031	14381.3	136905	-395.674
4	A4	19	611730	73533.7	11368.6	115155	149.74																4	A4	19	50428.5	4642.9	14473.7	132545	1045.96
5	A5	19	605822	69389.1	11954.4	109815	-891.497																5	A5	19	58616.5	5061.9	15174.9	130817	189.686
6	A6	19	604070	66950.7	11726.9	108353	-1031.96																6	A6	19	63699.6	5026.17	14854.1	130342	-509.526
7	A7	19	48734.9	6826.64	11338.3	106020	-1066.08																7	A7	19	748211	83208.7	16275.5	132621	-611.829
8	A8	19	50894.3	6695.18	12905.1	113346	-1881.36																8	A8	19	809319	91304.1	16721.6	136466	-633.557
9	A9	19	43770.4	5956.55	10848.3	111514	-2931.49																9	A9	19	777845	92416.5	15744.9	133816	-1880.89
10	A10	19	50001.1	6173.05	9797.46	109499	-1421.98																10	A10	19	44705.4	4144.19	13175.4	133962	-1286.94
11	A11	19	53508.6	8250.66	8924.29	108728	-1724.59																11	A11	19	49790.7	5465.44	12589.2	141330	-1222.1
12	A12	19	55977.4	9062.67	8211.41	115191	-2159.42																12	A12	19	54438.2	5787.8	11733	139547	-1446.4
13	B1	19	60680.3	8922.63	9448.55	122280	-2008.94																13	B1	19	69195.1	6425.21	13667.2	145652	-1292.41
14	B2	19	50494.2	6809.82	8422.02	99984.6	-1228.56																14	B2	19	143196	48922.9	17350.8	134868	-281.424
15	B3	19	51835	6162.92	9618.68	104094	-1090.83																15	B3	19	113413	10299.9	14851.5	123857	168.16
16	B4	19	564449	62469.8	11528.8	111035	-154.325																16	B4	19	48315.2	4587.8	13693	121734	309.773
17	B5	19	554863	58238.6	10836.8	96537.9	293.62																17	B5	19	83616.1	5392.97	13992	113667	827.523
18	B6	19	534428	54392.6	10621.8	94444.9	-99.7393																18	B6	19	42577.8	4168.84	13803.3	113847	298.207
19	B7	19	121380	13234.6	13031.3	108878	-1283.07																19	B7	19	794804	81466	16561.2	121602	-668.836
20	B8	19	128066	13206.5	11111.1	99204.3	-446.141																20	B8	19	804951	83962.3	15325.4	120847	-9.7281
21	B9	19	129998	14364.3	11068.4	105905	-139.013																21	B9	19	823595	90203.8	16053	128599	29.6323
22	B10	19	45832.1	6057.11	8667.1	88996.8	-641.695																22	B10	19	666572	82294	14104.2	115735	545.658
23	B11	19	38615.6	5463.39	8848.95	102309	-1665.48																23	B11	19	632280	86016.1	12561.4	111209	-885.326
24	B12	19	41239.8	8276.71	7556.61	94337.8	-666.811																24	B12	19	651367	100936	11139	113695	-393.052
25	C1	19	53978.4	8535.09	8128.6	102463	-1501.85																25	C1	19	61443.9	6420.24	12306.5	127766	-388.159
26	C2	19	53490.5	7712.05	9230.99	98956.2	711.03																26	C2	19	58774.4	6148.16	13315	124952	3860.83
27	C3	19	50966	6729.98	9233.01	94131.2	-1453.72																27	C3	19	52815.4	5792.41	13186.7	111820	-347.001
28	C4	19	40625.6	4791.07	10844.8	99925.1	-223.047																28	C4	19	34255.8	2731.35	1632.24	1905.33	1287.61
29	C5	19	53548.9	5730.39	10351.3	93704	287.984																29	C5	19	29229.3	2103.25	1357.04	2040.98	1076.06
30	C6	19	-14716.6	4219.52	10131.3	93146.7	-621.998																30	C6	19	-25148.4	2308.98	1278.31	1578.61	967.847
31	C7	19	48149.5	5584.41	11122.6	91283	-837.071																31	C7	19	27553	1964.05	2414.48	1526.77	-109.596
32	C8	19	43716.5	5521.37	11394.4	96734.3	-1251.46																32	C8	19	31446.6	2566.98	1602.86	2059.07	349.423
33	C9	19	12011.8	1971.7	9239.59	88710.8	-1144.27																33	C9	19	25136.1	2289.47	1022.13	1872.33	-370.47
34	C10	19	14031.3	1884.59	9266.2	91782.9	-961.093																34	C10	19	32190.1	2550.12	1484.47	1637.95	409.445
35	C11	19	13510.6	2280.77	8205.62	92713.2	-1399.48																35	C11	19	49059.6	4441.45	2494.93	3287.62	2423.03
36	C12	19	11938.8	3051.3	7360.16	91699.5	-439.423																36	C12	19	38141.1	3500.08	1439.33	2995.92	3200.62
37	D1	19	414920	58415.4	6701.25	76143	638.145																37	D1	19	125557	15145.9	12127.6	127602	1467.44
38	D2	19	482082	60473.1	12158.1	119882	497.404																38	D2	19	162606	18769.7	12855.2	117725	1609.16
39	D3	19	507460	56958.2	10181.6	94684.6	199.778																39	D3	19	137632	14720.1	12104.1	105360	685.068
40	D4	19	14062.2	1363.06	9951.87	88940.6	-295.174																40	D4	19	44740.8	3709.7	13545.9	109493	630.74
41	D5	19	15180.2	1518.59	9753.95	88293.6	2047.85																41	D5	19	63047.7	15300.2	14869.7	103875	768.725
42	D6	19	15844.4	1634.59	10846.4	88196.4	-342.853																42	D6	19	43770.6	5741.39	13833.2	102920	312.59
43	D7	19	12445.3	1018.14	10159.6	86109.5	-1259.67																43	D7	19	37936.5	3178.45	13578.4	104772	-743.815
44	D8	19	15861.7	1589.53	10475.6	88612.9	-678.983																44	D8	19	50912.9	5536.74	14373.6	104682	2141.05
45	D9	19	12885	1613.4	10760.2	94140.9	-959.826																45	D9	19	41045.4	3745.58	13262.2	106354	-209.512
46	D10	19	20949	3662.44	8835.19	88618.5	108.495																46	D10	19	46455.1	4608.65	13560.8	110362	965.388
47	D11	19	34928.8	9142.99	10101.1	102283	-1846.4																47	D11	19	46066.2	4444.77	11912.4	116574	-736.092
48	D12	19	13887.2	2060.62	8115.72	94818.6	-1521.08																48	D12	19	40957.1	4138.83	10246.1	108105	-1085.06
49	E1	19	417060	58351.2	9587.31	115569	-2.63914																49	E1	19	792936	110918	14001.9	141536	1219.93
50	E2	19	410269	51331.1	9774.12	108869	59.456																50	E2	19	781514	96535.6	14728.2	127014	2207.59
51	E3	19	510876	56429	10382.9	102506	846.377																51	E3	19	719406	80297.3	14253.6	117512	1612.85
52	E4	19	88209.7	8977.1	10336.7	90690	-250.207																52	E4	19	76277.7	7921.57	13581.3	104363	340.662
53	E5	19	72027.9	7666.62	10183.9	84929.3	99.7135																53	E5	19	59730.1	9274.08	13200.3	95659.3	771.127
54	E6	19	77308.4	7895.27	10053	83882.8	-315.26																54	E6	19	55701.1	5999.06	13100.7	98600.8	140.545
55	E7	19	17025.1	1941.32	10514.9	88014.1	968.248																55	E7	19	621179	61752.7	14444	104448	1219.22
56	E8	19	127467	21768.1	11008.2	85610.2	-825.031																56	E8	19	594366	59360.7	13503.6	99700.2	389.089
57	E9	19	15008	1738.96	10285	92355	-711.268																57	E9	19	636468	66465.5	14489.1	110789	436.547
58	E10	19	16620.2	2633.72	9440.6	92680.3	-222.854																58	E10	19	65962.5	7483.79	12512.9	106502	186.638
59	E11	19	17018.5	2242.96	9884.05	102693	224.397																59	E11	19	81116.1	9495.14	13778.1	116532	1081.04
60	E12	19	15339	2528.94	7952.66	97488.2	-1050.6																60	E12	19	85085.8	13330.5	11624.4	123119	-494.26
61	F1	19	22000	3516.48	10722.6	126983	-1168.42																61	F1	19	235333	29105.4	15886.6	157365	-246.962
62	F2	19	21606.2	3356.4	10544.4	112125	-1218.95																62	F2	19	200865	22077.2	13670.9	132348	-512.257
63	F3	19	20545.3	4030.23	10842.2	101407	-1545.28																63	F3	19	191091	19552.4	14475.6	121488	-498.936
64	F4	19	18148.9	1993.78	11681.7	107499	414.506																64	F4	19	85816	14539	15167.6	115326	1136.49
65	F5	19	28203.1	3672.62	9995.38	92207.5	-265.493																65	F5	19	73563.2	7021.02	13523.3	105304	464.11
66	F6	19	26100.3	2812.26	11089.8	94535.7	-561.754																66	F6	19	75385.7	7304.69	14517.1	110662	267.737
67	F7	19	26540.2	3187.15	10750.4	89617.6	-592.99																67	F7	19	680478	66976.3	15067.9	106675	2942.35
68	F8	19	29384.7	3900.92	12553.3	98770	-790.08																68	F8	19	798098	79938.6	16116.1	119058	53.7614
69	F9	19	32075.2	3838.55	11067.6	100718	856.07																69	F9	19	764128	80524	15864	121118	2650.63
70	F10	19	523090	59942.2	10146.2	99788.3	-1063.45																70	F10	19	723803	83322.4	14268.8	112137	-404.429
71	F11	19	574290	71973.7	9964.41	103775	406.143																71	F11	19	744111	94419.2	13903.7	121016	925.619
72	F12	19	570232	82128.2	9493.47	107090	-2056.47																72	F12	19	745451	108108	13668.6	125946	-1058.77
73	G1	19	37948.6	5197.04	11015.1	131782	-2337.78																73	G1	19	321505	43992	15264	161925	224.164
74	G2	19	32826.2	4549.44	10018.6	118486	-1393.2																74	G2	19	258856	33584.6	15654.2	156570	-19.8292
75	G3	19	29486.9	3773.77	10928.5	113061	-1506.84																75	G3	19	256699	30502.6	15695.4	135640	-156.146
76	G4	19	32553.4	4864.75	11101.8	109251	-2278.5																76	G4	19	119638	25969.7	17588.8	142458	-1284.53
77	G5	19	26983.3	3188.59	10562.2	92779.5	-195.662																77	G5	19	58937.1	6224.54	13459.7	109502	541.219
78	G6	19	27603	4592.5	11625.7	98805.9	-762.48																78	G6	19	75423.4	13578	15795	111714	1602.6
[truncated: 13,554 more rows]
