# Supplementary material for: Molecular and behavioral studies reveal differences in olfaction between winter and summer morphs of Drosophila suzukii
Source: PeerJ. 2022 Sep 16;10:e13825. doi: 10.7717/peerj.13825 (PMC9484457; doi:10.7717/peerj.13825)
Supplement: Supplemental Information 4 [file peerj-10-13825-s004.xlsx]

## Sheet: Sheet1
GeneID	Base mean	log2(FC)	StdErr	Wald-Stats	P-value	P-adj
DS10_00011701	449.653	7.48937	0.373882	20.0313	2.93627e-89	2.88048e-85
DS10_00000162	69441	-1.79895	0.105701	-17.0193	5.90869e-65	2.89821e-61
DS10_00006773	1436.62	5.44189	0.387398	14.0473	8.00559e-45	2.61783e-41
DS10_00005973	26890.1	-4.86969	0.39593	-12.2994	9.12928e-35	2.23896e-31
DS10_00004670	1824.33	1.57715	0.128698	12.2546	1.58763e-34	3.11493e-31
DS10_00009142	1273.87	4.00852	0.347256	11.5434	7.96931e-31	1.30298e-27
DS10_00004890	701707	-3.88216	0.346571	-11.2016	4.0039e-29	5.61117e-26
DS10_00004891	469194	-4.10211	0.37115	-11.0525	2.13293e-28	2.6155e-25
DS10_00006272	919.99	-1.59738	0.14601	-10.9401	7.40819e-28	8.07492e-25
DS10_00000247	835.951	2.03478	0.190208	10.6977	1.04369e-26	1.02386e-23
DS10_00010719	8037.45	2.55555	0.239544	10.6684	1.4305e-26	1.27575e-23
DS10_00012411	339.482	-3.99466	0.376423	-10.6122	2.61616e-26	2.13871e-23
DS10_00006843	237.029	-2.60895	0.249423	-10.4599	1.31947e-25	9.95691e-23
DS10_00004445	450.769	1.66195	0.160567	10.3505	4.16278e-25	2.91692e-22
DS10_00006717	26043.1	2.54475	0.24911	10.2154	1.69259e-24	1.10695e-21
DS10_00002426	82190.2	-1.37391	0.135884	-10.1109	4.94151e-24	3.02976e-21
DS10_00007068	139112	-1.79611	0.178365	-10.0699	7.50916e-24	4.33323e-21
DS10_00006763	70.7209	4.53049	0.455697	9.94188	2.73605e-23	1.49115e-20
DS10_00012848	361.012	-2.30193	0.235976	-9.75494	1.7571e-22	9.07217e-20
DS10_00008400	503804	-3.32642	0.342381	-9.71555	2.58853e-22	1.26967e-19
DS10_00011418	16591.8	-1.19855	0.124923	-9.59428	8.45033e-22	3.94751e-19
DS10_00005484	5325.18	-1.16315	0.121429	-9.57885	9.81331e-22	4.18559e-19
DS10_00007451	494.309	3.48839	0.364129	9.5801	9.69466e-22	4.18559e-19
DS10_00004647	1674.11	-1.54924	0.162607	-9.5275	1.61123e-21	6.58589e-19
DS10_00011507	897.653	-3.21889	0.338501	-9.50925	1.92044e-21	7.53581e-19
DS10_00013076	1073.49	3.68364	0.39641	9.29249	1.50727e-20	5.68704e-18
DS10_00007513	3771.39	1.31333	0.141467	9.28365	1.63764e-20	5.95008e-18
DS10_00012395	20501.7	1.6178	0.17437	9.27798	1.72729e-20	6.05167e-18
DS10_00006716	41448.1	2.43277	0.266347	9.13383	6.61203e-20	2.23669e-17
DS10_00012387	3083.01	-3.72358	0.408654	-9.11183	8.1006e-20	2.6489e-17
DS10_00001532	8521.05	2.3658	0.260277	9.08954	9.94605e-20	3.14744e-17
DS10_00010584	7750.28	-1.61191	0.180542	-8.92822	4.3291e-19	1.32714e-16
DS10_00005788	131.98	3.87947	0.436302	8.89171	6.01768e-19	1.78889e-16
DS10_00002806	576.186	-1.94839	0.220257	-8.84597	9.07339e-19	2.61794e-16
DS10_00002372	6653.71	1.73321	0.200525	8.64335	5.45888e-18	1.53005e-15
DS10_00010769	636.735	2.42263	0.280787	8.628	6.24315e-18	1.70126e-15
DS10_00001733	1170.11	3.21444	0.375556	8.55915	1.13701e-17	3.01462e-15
DS10_00012599	22439.7	2.35199	0.276679	8.50077	1.88344e-17	4.86225e-15
DS10_00004328	1897.76	-1.3488	0.159724	-8.44457	3.05162e-17	7.67599e-15
DS10_00002541	2070.14	-1.40405	0.166628	-8.42628	3.56818e-17	8.75096e-15
DS10_00009650	1711.33	-1.41548	0.168242	-8.41339	3.98342e-17	9.53105e-15
DS10_00003021	3915.33	-1.37569	0.163645	-8.40654	4.22267e-17	9.86294e-15
DS10_00006834	2039.92	1.76575	0.210122	8.40344	4.3358e-17	9.89168e-15
DS10_00001452	360.855	-1.47296	0.17944	-8.20861	2.23755e-16	4.98873e-14
DS10_00006223	4015.43	-1.85035	0.227484	-8.134	4.15369e-16	9.05504e-14
DS10_00000924	1324.88	-1.65588	0.203754	-8.12688	4.40475e-16	9.39361e-14
DS10_00005787	1311.5	-1.89722	0.234928	-8.07576	6.70604e-16	1.39971e-13
DS10_00001472	2446.29	-1.22631	0.153493	-7.98933	1.35678e-15	2.77292e-13
DS10_00011638	929.485	2.63757	0.331404	7.95877	1.73762e-15	3.47878e-13
DS10_00013161	396.905	-2.05633	0.259122	-7.93577	2.09194e-15	4.10438e-13
DS10_00008965	69.1637	-3.80547	0.481036	-7.91099	2.55349e-15	4.91171e-13
DS10_00000293	1299.38	-2.283	0.292782	-7.79762	6.30845e-15	1.17404e-12
DS10_00001002	2147.39	-1.61604	0.207266	-7.79693	6.34295e-15	1.17404e-12
DS10_00007357	324.915	-1.45493	0.187923	-7.74216	9.77448e-15	1.7757e-12
DS10_00003597	3709.77	-2.85908	0.369823	-7.73094	1.06755e-14	1.87012e-12
DS10_00010034	88.7114	-3.44579	0.44566	-7.73187	1.05974e-14	1.87012e-12
DS10_00009067	6845.59	-1.55571	0.201481	-7.72135	1.15105e-14	1.98101e-12
DS10_00009435	15188.9	1.87084	0.242451	7.71637	1.19685e-14	2.02433e-12
DS10_00001732	972.986	2.96979	0.385036	7.71301	1.22887e-14	2.04325e-12
DS10_00012965	157.59	-2.11666	0.276739	-7.64858	2.03211e-14	3.3225e-12
DS10_00008644	3158.58	-1.37104	0.179555	-7.63578	2.24457e-14	3.6097e-12
DS10_00001969	509.978	2.42406	0.31765	7.63123	2.3253e-14	3.67923e-12
DS10_00003383	70741.3	-1.4807	0.1954	-7.57781	3.51435e-14	5.47234e-12
DS10_00002421	124.181	2.53269	0.335931	7.53931	4.72448e-14	7.24174e-12
DS10_00013455	86.9245	3.64209	0.48339	7.53448	4.90301e-14	7.39977e-12
DS10_00005003	807.697	-3.1461	0.42072	-7.4779	7.55172e-14	1.12246e-11
DS10_00006251	430.415	-1.50643	0.20355	-7.40081	1.35358e-13	1.98189e-11
DS10_00009184	162.73	3.41323	0.461743	7.39205	1.44586e-13	2.08586e-11
DS10_00001278	5860.17	-1.74383	0.236063	-7.38713	1.50031e-13	2.13305e-11
DS10_00004123	82.9363	-2.16591	0.294005	-7.36693	1.74602e-13	2.44693e-11
DS10_00008424	1508.69	1.24752	0.169812	7.34648	2.03493e-13	2.7726e-11
DS10_00010970	132.331	2.66196	0.362334	7.3467	2.03168e-13	2.7726e-11
DS10_00002689	1661.14	-1.46138	0.202104	-7.23084	4.80004e-13	6.45046e-11
DS10_00006431	6233.84	-1.64413	0.228009	-7.2108	5.56242e-13	7.37396e-11
DS10_00002210	3411.63	-1.69545	0.235357	-7.20373	5.85861e-13	7.66307e-11
DS10_00007600	4912.52	-1.70134	0.236956	-7.17996	6.97309e-13	9.00079e-11
DS10_00009055	2258.11	1.43175	0.199547	7.17499	7.23151e-13	9.21313e-11
DS10_00005778	2148.65	-0.818477	0.114427	-7.15285	8.49923e-13	1.06894e-10
DS10_00011371	287.717	-2.23467	0.316609	-7.05815	1.68736e-12	2.09532e-10
DS10_00006145	3286.38	-1.80888	0.2574	-7.0275	2.10266e-12	2.57838e-10
DS10_00013396	78077	-1.6731	0.23937	-6.9896	2.75668e-12	3.33865e-10
DS10_00001906	5332.08	-1.01123	0.14506	-6.9711	3.14474e-12	3.76218e-10
DS10_00006337	10489.7	0.98692	0.141613	6.96916	3.18847e-12	3.76854e-10
DS10_00006011	1415.86	-1.49247	0.215627	-6.92152	4.46808e-12	5.21808e-10
DS10_00010487	369.099	2.99521	0.433351	6.91175	4.78725e-12	5.52505e-10
DS10_00004344	5499.24	-0.876066	0.127019	-6.89714	5.306e-12	6.05254e-10
DS10_00008639	9115.31	-1.22921	0.178269	-6.89527	5.3761e-12	6.06202e-10
DS10_00000408	1864.19	-1.38143	0.200571	-6.8875	5.67828e-12	6.31435e-10
DS10_00006426	1302.62	-2.12556	0.308667	-6.88624	5.72861e-12	6.31435e-10
DS10_00000250	1233.3	-1.51421	0.220551	-6.8656	6.62127e-12	7.21718e-10
DS10_00007413	616.182	-1.36954	0.200097	-6.8444	7.67981e-12	8.279e-10
DS10_00011200	91.6678	-2.53291	0.370522	-6.83606	8.13987e-12	8.67957e-10
DS10_00003962	318.801	-1.31905	0.193279	-6.82462	8.8156e-12	9.22653e-10
DS10_00004932	5646.47	-1.12873	0.1654	-6.82421	8.84091e-12	9.22653e-10
DS10_00011639	93.3216	3.23457	0.477263	6.77734	1.22412e-11	1.26406e-09
DS10_00011383	45.5782	-2.53988	0.375313	-6.76738	1.31139e-11	1.34008e-09
DS10_00012228	8249.57	-1.35625	0.203559	-6.66269	2.68864e-11	2.71913e-09
DS10_00003614	2158.9	-1.04305	0.156794	-6.65236	2.88436e-11	2.8873e-09
DS10_00002659	8024.75	-1.31262	0.197746	-6.63792	3.18138e-11	3.15246e-09
DS10_00008394	392.27	-1.39017	0.209517	-6.63514	3.24203e-11	3.18043e-09
DS10_00009966	2309.95	1.05212	0.158618	6.63304	3.28835e-11	3.19393e-09
DS10_00003868	24437.3	-1.2366	0.186928	-6.61539	3.70571e-11	3.56402e-09
DS10_00007564	1747.3	-1.01617	0.153658	-6.61321	3.76067e-11	3.58177e-09
DS10_00011510	1009.73	0.92759	0.140449	6.60447	3.9895e-11	3.76317e-09
DS10_00002640	533.17	1.06487	0.161919	6.57653	4.81539e-11	4.49254e-09
DS10_00010717	9707.92	1.35201	0.205618	6.57534	4.85432e-11	4.49254e-09
DS10_00004912	2427.22	-1.2222	0.186285	-6.56093	5.3474e-11	4.90262e-09
DS10_00000944	1045.62	-2.1614	0.329831	-6.55306	5.63702e-11	5.11676e-09
DS10_00010604	1843.25	-2.16584	0.330573	-6.55179	5.68529e-11	5.11676e-09
DS10_00005038	4360.34	-1.78529	0.272557	-6.55014	5.74815e-11	5.1263e-09
DS10_00000519	1263.42	-1.50875	0.230617	-6.54225	6.05993e-11	5.35567e-09
DS10_00011092	20544.5	-1.27175	0.194581	-6.53582	6.32602e-11	5.54092e-09
DS10_00007788	278.227	-2.0794	0.318339	-6.53203	6.48829e-11	5.58335e-09
DS10_00011384	506.923	-1.80408	0.27617	-6.53248	6.469e-11	5.58335e-09
DS10_00010040	7688.64	0.739579	0.113418	6.52082	6.99254e-11	5.96494e-09
DS10_00000939	792.348	-2.79335	0.430848	-6.48339	8.96856e-11	7.58462e-09
DS10_00005807	36.4878	-3.15678	0.488513	-6.46203	1.0331e-10	8.66213e-09
DS10_00010653	400.427	-1.38349	0.214766	-6.44185	1.18026e-10	9.81217e-09
DS10_00008815	4692.01	-1.14611	0.178372	-6.42542	1.31509e-10	1.07508e-08
DS10_00013334	801.874	-0.935759	0.145626	-6.42575	1.31217e-10	1.07508e-08
DS10_00000157	823.026	-2.44688	0.381683	-6.41076	1.44799e-10	1.17395e-08
DS10_00000055	1231.6	-0.917112	0.143592	-6.38692	1.69255e-10	1.36098e-08
DS10_00004958	2753.14	-2.0186	0.316175	-6.38445	1.72018e-10	1.37195e-08
DS10_00009646	460.251	-1.16535	0.182968	-6.36913	1.90109e-10	1.50401e-08
DS10_00007855	1446.54	-2.11619	0.332988	-6.35517	2.08202e-10	1.63397e-08
DS10_00002289	142.779	2.57824	0.407566	6.32596	2.5167e-10	1.95943e-08
DS10_00010756	2828.49	-0.803927	0.127162	-6.32207	2.58074e-10	1.99347e-08
DS10_00012740	1854.75	1.41144	0.223909	6.30362	2.90775e-10	2.22852e-08
DS10_00009645	535.993	-1.21479	0.193154	-6.28922	3.19063e-10	2.42636e-08
DS10_00003751	281.628	-1.48273	0.236323	-6.27415	3.5154e-10	2.65278e-08
DS10_00003730	98.764	2.38635	0.380563	6.27057	3.59724e-10	2.6533e-08
DS10_00003772	4856.76	1.76289	0.281096	6.27147	3.57655e-10	2.6533e-08
DS10_00006498	925.965	0.97609	0.155654	6.27088	3.59014e-10	2.6533e-08
DS10_00003798	4762.89	-1.04039	0.166068	-6.26481	3.73279e-10	2.73273e-08
DS10_00003073	270.974	2.2025	0.351749	6.26155	3.81177e-10	2.76989e-08
DS10_00008292	135.165	-1.86875	0.299434	-6.24093	4.34984e-10	3.13764e-08
DS10_00002842	724.597	-1.55265	0.250147	-6.20693	5.40283e-10	3.86874e-08
DS10_00000242	168.359	-2.8556	0.461473	-6.188	6.09319e-10	4.33146e-08
DS10_00006144	923.635	-1.96933	0.319084	-6.17182	6.75084e-10	4.76444e-08
DS10_00011764	177.345	1.55122	0.251768	6.16131	7.21435e-10	5.0552e-08
DS10_00002055	23459.6	-1.15772	0.18851	-6.14146	8.17664e-10	5.68885e-08
DS10_00001525	5053.37	0.954214	0.15565	6.13049	8.76065e-10	6.03876e-08
DS10_00003263	9686.07	-1.3829	0.225605	-6.12973	8.80267e-10	6.03876e-08
DS10_00012308	17645.7	-1.02841	0.167886	-6.12565	9.03124e-10	6.15253e-08
DS10_00005017	4906.18	-1.34173	0.219139	-6.12271	9.19947e-10	6.22363e-08
DS10_00005962	111.3	2.04665	0.334331	6.12163	9.26249e-10	6.22363e-08
DS10_00004161	542.815	-1.09751	0.179609	-6.11059	9.92663e-10	6.6245e-08
DS10_00000452	2580.62	-0.691369	0.113722	-6.07945	1.20596e-09	7.99354e-08
DS10_00010605	341.027	-1.89561	0.311953	-6.07659	1.22763e-09	8.0826e-08
DS10_00006885	1859.72	-1.6255	0.268316	-6.05815	1.37698e-09	9.00547e-08
DS10_00004718	72.1774	2.95109	0.48909	6.03384	1.60104e-09	1.04015e-07
DS10_00013527	5453.63	-1.87891	0.311679	-6.02834	1.65653e-09	1.06912e-07
DS10_00001512	2985.04	-1.7615	0.29262	-6.01973	1.74705e-09	1.10696e-07
DS10_00001575	10880.6	-0.920892	0.152966	-6.02023	1.74165e-09	1.10696e-07
DS10_00009592	30333	-1.11693	0.185582	-6.01851	1.76031e-09	1.10696e-07
DS10_00009895	58.9163	2.46451	0.409419	6.01954	1.74917e-09	1.10696e-07
DS10_00004468	34067.9	-1.18308	0.197328	-5.99552	2.02832e-09	1.26737e-07
DS10_00010851	953.295	-2.05453	0.343369	-5.98345	2.18461e-09	1.35639e-07
DS10_00010707	4601.48	0.877151	0.14668	5.98003	2.23091e-09	1.37643e-07
DS10_00010808	545.837	-1.17829	0.197202	-5.97507	2.29993e-09	1.41014e-07
DS10_00009397	7635.62	-1.26946	0.212769	-5.96639	2.42563e-09	1.47797e-07
DS10_00012957	4609.05	-1.17003	0.196201	-5.96345	2.46962e-09	1.49549e-07
DS10_00011509	80.2385	-2.27717	0.382398	-5.95496	2.60138e-09	1.56561e-07
DS10_00003612	1313.49	-1.91121	0.321143	-5.95127	2.66072e-09	1.59156e-07
DS10_00000482	161.075	-1.95799	0.329303	-5.94585	2.75018e-09	1.63511e-07
DS10_00004748	1183.98	-0.856313	0.144049	-5.9446	2.77135e-09	1.63776e-07
DS10_00004320	873.361	0.907785	0.152836	5.93959	2.85736e-09	1.6685e-07
DS10_00009057	710.661	-1.73757	0.292512	-5.94015	2.84753e-09	1.6685e-07
DS10_00004860	276.886	-1.22252	0.205965	-5.93554	2.92884e-09	1.70012e-07
DS10_00001395	4247.35	-0.715032	0.120526	-5.93262	2.98147e-09	1.71042e-07
DS10_00009232	6183.65	-1.24585	0.209994	-5.93278	2.97842e-09	1.71042e-07
DS10_00011471	370.003	-1.90552	0.321766	-5.92207	3.17908e-09	1.81318e-07
DS10_00011761	516.004	2.09715	0.354772	5.91127	3.39485e-09	1.92506e-07
DS10_00012294	4409.92	-0.817764	0.138438	-5.90709	3.48205e-09	1.96315e-07
DS10_00000313	5234.19	-1.25658	0.213696	-5.88023	4.09698e-09	2.29665e-07
DS10_00001601	5721.08	-1.10186	0.187467	-5.87763	4.1617e-09	2.31968e-07
DS10_00003620	2815.8	1.21833	0.207571	5.86946	4.37209e-09	2.41481e-07
DS10_00005431	1933.26	-0.782912	0.133395	-5.8691	4.38161e-09	2.41481e-07
DS10_00010712	3436.06	-2.81395	0.479552	-5.86787	4.41424e-09	2.4192e-07
DS10_00008766	386.711	-1.43963	0.245759	-5.85789	4.68782e-09	2.55486e-07
DS10_00007854	1153.96	-2.1754	0.372337	-5.84254	5.14094e-09	2.78633e-07
DS10_00007928	23676.9	-1.18818	0.204485	-5.81058	6.22569e-09	3.35572e-07
DS10_00013296	1361.33	1.34423	0.231507	5.80642	6.38236e-09	3.42136e-07
DS10_00009930	5710.87	1.16044	0.200019	5.80167	6.5658e-09	3.50057e-07
DS10_00005305	4882.45	-1.05619	0.182388	-5.79089	7.0016e-09	3.69278e-07
DS10_00010809	564.889	-1.6825	0.290498	-5.79177	6.96485e-09	3.69278e-07
DS10_00008814	717.373	-1.16016	0.200402	-5.78917	7.07334e-09	3.71067e-07
DS10_00005253	5754.73	-1.14258	0.197533	-5.78425	7.2838e-09	3.80075e-07
DS10_00000986	1110.72	-1.38676	0.239973	-5.77881	7.52328e-09	3.90494e-07
DS10_00003540	2771.58	-1.57217	0.272153	-5.77678	7.61433e-09	3.9314e-07
DS10_00002423	64.273	2.66975	0.46228	5.77519	7.68658e-09	3.94149e-07
DS10_00011027	1620.77	-1.16489	0.201726	-5.77459	7.71424e-09	3.94149e-07
DS10_00003495	547.827	-1.61583	0.280206	-5.76657	8.08992e-09	4.11202e-07
DS10_00008722	3700.66	0.928523	0.161073	5.7646	8.1851e-09	4.13896e-07
DS10_00009036	197.149	1.57011	0.273165	5.74786	9.03803e-09	4.54682e-07
DS10_00002493	21236.5	-1.02435	0.178572	-5.73635	9.67371e-09	4.79288e-07
DS10_00007026	31709.9	-1.07215	0.186867	-5.73751	9.60796e-09	4.79288e-07
DS10_00010876	16000.7	-1.17882	0.205481	-5.73687	9.64399e-09	4.79288e-07
DS10_00006029	343.733	2.22938	0.389472	5.72412	1.03973e-08	5.12551e-07
DS10_00005486	40281.3	1.05186	0.183799	5.7229	1.04722e-08	5.13659e-07
DS10_00007507	1642.24	1.09136	0.190847	5.71852	1.07454e-08	5.2444e-07
DS10_00005550	78.8188	-1.86123	0.326437	-5.70165	1.18651e-08	5.76223e-07
DS10_00008637	43330.5	-1.17667	0.206734	-5.69172	1.25765e-08	6.07762e-07
DS10_00006893	5610.07	1.16574	0.204891	5.68955	1.27377e-08	6.12534e-07
DS10_00007035	10649.3	-1.05747	0.186029	-5.68443	1.3125e-08	6.28078e-07
DS10_00004381	31292.6	-0.971047	0.17153	-5.66109	1.50414e-08	7.13941e-07
DS10_00007341	1954.65	-0.838684	0.148167	-5.66039	1.51033e-08	7.13941e-07
DS10_00013055	642.285	0.810304	0.143163	5.66	1.51376e-08	7.13941e-07
DS10_00002184	7313.9	1.01018	0.178731	5.65196	1.58626e-08	7.44554e-07
DS10_00004676	18129.7	-1.08662	0.192609	-5.64158	1.68493e-08	7.87102e-07
DS10_00003562	867.091	-0.880867	0.156183	-5.63997	1.70077e-08	7.90735e-07
DS10_00012358	220.049	-2.11285	0.375429	-5.62781	1.82511e-08	8.44546e-07
DS10_00009621	1891.19	-1.22432	0.217839	-5.62031	1.90612e-08	8.77891e-07
DS10_00013331	565.691	-1.29689	0.231306	-5.60681	2.06088e-08	9.44729e-07
DS10_00003695	205.537	2.13955	0.381961	5.60149	2.12517e-08	9.69669e-07
DS10_00005254	2006.23	-1.17158	0.209197	-5.60035	2.13913e-08	9.71523e-07
DS10_00011150	472.697	-1.1719	0.209578	-5.59171	2.24844e-08	1.01646e-06
DS10_00005802	2009.6	-1.3498	0.241578	-5.58744	2.30438e-08	1.03697e-06
DS10_00004924	2045.4	-0.829931	0.149381	-5.55578	2.76367e-08	1.23797e-06
DS10_00010849	53.5731	2.53453	0.45664	5.55039	2.85028e-08	1.27097e-06
DS10_00011233	533.003	-1.36504	0.246239	-5.54357	2.96371e-08	1.31557e-06
DS10_00011970	665.77	-0.898179	0.162171	-5.53846	3.05136e-08	1.34837e-06
DS10_00010254	938.647	-1.1508	0.207848	-5.5367	3.08218e-08	1.35588e-06
DS10_00002585	17552.9	-1.0624	0.192171	-5.52841	3.23155e-08	1.41524e-06
DS10_00004798	341.815	-1.59696	0.288971	-5.52636	3.26952e-08	1.42551e-06
DS10_00011607	1018.6	-1.58363	0.287095	-5.51604	3.46721e-08	1.50501e-06
DS10_00003095	252.111	-1.88499	0.341956	-5.5124	3.5398e-08	1.52976e-06
DS10_00000232	2320.46	-1.23305	0.223794	-5.50976	3.59331e-08	1.54034e-06
DS10_00007093	2246.93	1.69282	0.307247	5.50964	3.59569e-08	1.54034e-06
DS10_00011463	2083.42	-1.39867	0.254159	-5.50312	3.73121e-08	1.59144e-06
DS10_00005606	1473.02	-1.6883	0.307072	-5.49805	3.84025e-08	1.63086e-06
DS10_00010892	16747.6	-1.14579	0.208782	-5.48797	4.06583e-08	1.71921e-06
DS10_00002757	7585.81	-0.786505	0.143837	-5.46804	4.5505e-08	1.90771e-06
DS10_00009562	823.075	-1.88236	0.344215	-5.46856	4.53694e-08	1.90771e-06
DS10_00013335	1401.75	-0.98942	0.181117	-5.46286	4.68515e-08	1.9558e-06
DS10_00012601	2368.56	-0.77781	0.142567	-5.45576	4.87638e-08	2.027e-06
DS10_00001840	284.21	-1.39997	0.256705	-5.45361	4.93566e-08	2.04299e-06
DS10_00004759	9655.41	-1.05338	0.193195	-5.45239	4.96973e-08	2.04845e-06
DS10_00009965	4607.15	0.997711	0.183181	5.4466	5.13429e-08	2.10742e-06
DS10_00006154	34944.5	-1.00397	0.184383	-5.44502	5.18001e-08	2.11733e-06
DS10_00002234	872.82	-0.699432	0.12868	-5.43543	5.46632e-08	2.22509e-06
DS10_00001360	109357	-0.872264	0.160596	-5.4314	5.59125e-08	2.26654e-06
DS10_00004705	7288.28	-1.64681	0.303625	-5.42383	5.83343e-08	2.35498e-06
DS10_00006694	1596.97	-2.00008	0.369045	-5.41962	5.97274e-08	2.40133e-06
DS10_00007909	472.983	0.81155	0.149879	5.41471	6.13893e-08	2.45808e-06
DS10_00012279	2686.99	0.824236	0.152247	5.41379	6.1704e-08	2.46064e-06
DS10_00009813	61.9586	1.94171	0.358748	5.41246	6.21647e-08	2.46897e-06
DS10_00009743	21.3477	2.65108	0.490962	5.39976	6.67295e-08	2.63958e-06
DS10_00005037	44636.4	-1.05129	0.194991	-5.3915	6.98722e-08	2.73086e-06
DS10_00006327	25166.5	-0.89329	0.165641	-5.39292	6.93232e-08	2.73086e-06
DS10_00009252	267.354	-1.09697	0.203442	-5.39205	6.96592e-08	2.73086e-06
DS10_00008004	600.623	-1.31832	0.244811	-5.38506	7.24187e-08	2.81916e-06
DS10_00002910	1694.23	-0.753791	0.140097	-5.3805	7.42812e-08	2.88023e-06
DS10_00009029	2690.26	-0.860446	0.159994	-5.37797	7.53283e-08	2.90934e-06
DS10_00007208	2614.52	0.806723	0.150383	5.36446	8.11904e-08	3.11754e-06
DS10_00010557	1703.49	-1.19769	0.223279	-5.3641	8.13548e-08	3.11754e-06
DS10_00006986	2424.4	1.4274	0.26622	5.36171	8.24392e-08	3.1468e-06
DS10_00003485	1280.49	0.633977	0.118272	5.36034	8.3066e-08	3.15844e-06
DS10_00001529	9841.32	-1.21723	0.227438	-5.35192	8.70279e-08	3.29631e-06
DS10_00005845	1795.52	0.826012	0.154396	5.34996	8.79743e-08	3.30662e-06
DS10_00009995	945.972	-1.47865	0.276362	-5.3504	8.77589e-08	3.30662e-06
DS10_00007799	12914	-1.12021	0.209832	-5.33861	9.36632e-08	3.50701e-06
DS10_00005360	3908.06	0.902859	0.169149	5.33764	9.41635e-08	3.51234e-06
DS10_00000925	146.669	-1.87874	0.352362	-5.33186	9.72098e-08	3.61223e-06
DS10_00010577	1468.32	0.9761	0.183185	5.32849	9.90323e-08	3.66606e-06
DS10_00000587	10068.1	-0.898192	0.168591	-5.32763	9.95041e-08	3.66968e-06
DS10_00004961	3814.89	-1.0005	0.187843	-5.32627	1.00251e-07	3.68337e-06
DS10_00002571	625.989	0.836613	0.157254	5.32012	1.03699e-07	3.79586e-06
DS10_00009199	2987.68	-0.989654	0.186427	-5.30852	1.10518e-07	4.03042e-06
DS10_00003119	321.885	-1.51701	0.285917	-5.30577	1.12201e-07	4.07663e-06
DS10_00000042	19204.1	-1.20223	0.227214	-5.29118	1.21531e-07	4.39932e-06
DS10_00000628	588.616	-1.81392	0.342882	-5.29022	1.22172e-07	4.40629e-06
DS10_00003582	24664	-1.01666	0.192346	-5.28562	1.25283e-07	4.50192e-06
DS10_00004189	334.639	-1.41076	0.267577	-5.27233	1.34701e-07	4.82269e-06
DS10_00008502	27885.9	-1.04474	0.198571	-5.2613	1.4304e-07	5.10261e-06
DS10_00003076	4664.63	-0.857756	0.163212	-5.25547	1.47649e-07	5.24795e-06
DS10_00008873	128.773	2.15855	0.411516	5.24536	1.55981e-07	5.52408e-06
DS10_00001882	21069.8	-0.992702	0.189462	-5.23958	1.60939e-07	5.67919e-06
DS10_00007898	122.413	1.93836	0.370137	5.23687	1.63318e-07	5.74249e-06
DS10_00008658	1207.33	-1.04285	0.199751	-5.22078	1.78168e-07	6.24223e-06
DS10_00003610	29726.6	-1.02761	0.196956	-5.21744	1.81409e-07	6.33319e-06
DS10_00005132	35073.7	-1.03389	0.198234	-5.21549	1.83329e-07	6.37751e-06
DS10_00009427	16.8817	-2.56183	0.491485	-5.21244	1.86377e-07	6.46062e-06
DS10_00009440	33417.4	-0.804758	0.154493	-5.20903	1.89831e-07	6.5572e-06
DS10_00011736	32648	-0.996312	0.191337	-5.20711	1.918e-07	6.60196e-06
DS10_00003297	261.96	1.37446	0.264005	5.20617	1.92778e-07	6.61242e-06
DS10_00005662	781.246	-1.33384	0.256272	-5.20477	1.94241e-07	6.62164e-06
DS10_00007508	345.164	1.31771	0.253182	5.20462	1.94397e-07	6.62164e-06
DS10_00006904	1638.81	-0.909525	0.174913	-5.19988	1.9942e-07	6.76924e-06
DS10_00002865	1997.57	-0.987971	0.190243	-5.1932	2.06715e-07	6.99267e-06
DS10_00004540	1026.42	1.75265	0.337558	5.19214	2.07886e-07	6.99892e-06
DS10_00012109	4870.32	1.21562	0.234144	5.19175	2.08327e-07	6.99892e-06
DS10_00002147	19502.6	-0.889021	0.171291	-5.19012	2.10163e-07	7.0365e-06
DS10_00005992	1871.66	-0.904768	0.1748	-5.17601	2.26684e-07	7.56384e-06
DS10_00003232	896.572	-0.896041	0.173545	-5.16315	2.42822e-07	8.04758e-06
DS10_00013269	15052.1	-0.977916	0.189391	-5.16348	2.42406e-07	8.04758e-06
DS10_00011610	8797.11	-1.13872	0.220688	-5.15989	2.47101e-07	8.16183e-06
DS10_00000915	141.735	-2.00844	0.389903	-5.15113	2.58921e-07	8.52352e-06
DS10_00001343	20160.2	-0.755404	0.146875	-5.14317	2.70146e-07	8.86332e-06
DS10_00009502	2604.59	1.29653	0.252323	5.13837	2.77134e-07	9.0623e-06
DS10_00013336	343.551	-0.974399	0.189773	-5.13454	2.82833e-07	9.21791e-06
DS10_00003849	17145.8	-1.0419	0.203043	-5.13143	2.87556e-07	9.34081e-06
DS10_00011728	109315	-1.00232	0.195376	-5.13024	2.89373e-07	9.3688e-06
DS10_00004135	3455.65	-1.42255	0.277379	-5.12856	2.91973e-07	9.391e-06
DS10_00011043	29831.7	-1.0852	0.21158	-5.12904	2.9122e-07	9.391e-06
DS10_00013539	9723.4	-1.01211	0.197438	-5.12623	2.956e-07	9.4766e-06
DS10_00005509	64.6975	-2.40311	0.468958	-5.12435	2.98561e-07	9.54034e-06
DS10_00002112	20323.2	-0.971428	0.189971	-5.11357	3.16124e-07	1.00688e-05
DS10_00012636	326.649	1.24633	0.244112	5.10558	3.29774e-07	1.04695e-05
DS10_00005418	2100.79	-0.807255	0.158201	-5.10271	3.34822e-07	1.05955e-05
DS10_00001238	10935.9	-1.06237	0.208905	-5.08544	3.66777e-07	1.15694e-05
DS10_00010990	906.482	-1.26078	0.247998	-5.08383	3.69901e-07	1.16305e-05
DS10_00011137	211.206	-1.2455	0.245894	-5.06519	4.07989e-07	1.27871e-05
DS10_00007560	423.349	-1.03082	0.203924	-5.05493	4.30555e-07	1.34514e-05
DS10_00011867	325.944	-0.981572	0.194444	-5.0481	4.46219e-07	1.38965e-05
DS10_00002297	20317	-1.01403	0.201008	-5.04471	4.54219e-07	1.4057e-05
DS10_00010875	2339.36	-1.12714	0.22343	-5.0447	4.54239e-07	1.4057e-05
DS10_00000528	51.4487	-2.19269	0.435007	-5.04058	4.64112e-07	1.43174e-05
DS10_00002569	634.738	-0.757372	0.150318	-5.03846	4.69296e-07	1.4432e-05
DS10_00003379	136.154	-1.54009	0.305955	-5.03371	4.81083e-07	1.47482e-05
DS10_00007492	968.274	1.59266	0.316466	5.03265	4.8375e-07	1.47837e-05
DS10_00001279	7137.1	-1.07671	0.214034	-5.03054	4.89111e-07	1.49012e-05
DS10_00007389	28869	-0.944822	0.188015	-5.02525	5.02767e-07	1.52698e-05
DS10_00003581	8107.12	-0.659444	0.131268	-5.02364	5.07003e-07	1.53509e-05
DS10_00010843	60486.7	-1.01859	0.202833	-5.0218	5.11893e-07	1.54513e-05
DS10_00009056	288.595	-1.16369	0.232614	-5.00266	5.65441e-07	1.70153e-05
DS10_00013318	14.2605	-2.45764	0.491493	-5.00036	5.7223e-07	1.71669e-05
DS10_00011374	13677	-1.01287	0.202611	-4.99907	5.76079e-07	1.72297e-05
DS10_00005566	876.952	-1.29529	0.259153	-4.99817	5.78755e-07	1.72571e-05
DS10_00007873	400.915	-1.19301	0.238745	-4.997	5.82296e-07	1.73101e-05
DS10_00010782	1421.96	0.744093	0.148967	4.99501	5.88341e-07	1.74369e-05
DS10_00009565	745.501	1.84143	0.368849	4.99238	5.96393e-07	1.76223e-05
DS10_00004931	12496.8	-0.907114	0.181743	-4.99119	6.00076e-07	1.76779e-05
DS10_00007221	4335.28	-1.54277	0.309275	-4.98835	6.08958e-07	1.78859e-05
DS10_00002351	13296.7	-1.40505	0.281959	-4.98318	6.25488e-07	1.83165e-05
DS10_00002488	4387.88	-0.957199	0.192225	-4.97958	6.37211e-07	1.86043e-05
DS10_00005661	896.563	-1.47396	0.296074	-4.97833	6.41337e-07	1.86692e-05
DS10_00011478	1144.25	-0.77979	0.157102	-4.9636	6.91994e-07	2.00842e-05
DS10_00001984	1479.64	1.37613	0.277531	4.95846	7.10531e-07	2.04408e-05
DS10_00008298	702.256	1.14561	0.231018	4.95898	7.08648e-07	2.04408e-05
DS10_00011382	142.37	-1.62383	0.327458	-4.9589	7.0894e-07	2.04408e-05
DS10_00012838	488.046	0.889139	0.179453	4.95471	7.24382e-07	2.07783e-05
DS10_00005180	3900.2	1.17499	0.237335	4.95077	7.39218e-07	2.11083e-05
DS10_00008511	34.0592	2.42464	0.489776	4.95051	7.4019e-07	2.11083e-05
DS10_00012557	401.097	0.864486	0.17483	4.94472	7.62522e-07	2.16822e-05
DS10_00008214	9195.09	-0.961499	0.194608	-4.9407	7.78408e-07	2.20699e-05
DS10_00007316	786.448	0.769395	0.156252	4.92407	8.47624e-07	2.39631e-05
DS10_00002748	331.234	-1.2097	0.246329	-4.9109	9.06605e-07	2.55075e-05
DS10_00003754	23488.4	-0.92379	0.188117	-4.91071	9.07453e-07	2.55075e-05
DS10_00008505	5792.38	-1.02781	0.209487	-4.9063	9.28086e-07	2.60129e-05
DS10_00011980	267.744	-0.962759	0.196364	-4.90292	9.44214e-07	2.63896e-05
DS10_00000125	95.7144	-2.30377	0.470154	-4.90004	9.58175e-07	2.67037e-05
DS10_00002119	11371.9	-0.879655	0.179677	-4.89576	9.79274e-07	2.72144e-05
DS10_00011609	1590.12	-1.22302	0.250232	-4.88754	1.02105e-06	2.82951e-05
DS10_00013445	134.855	-1.64996	0.338645	-4.87225	1.10335e-06	3.04896e-05
DS10_00007173	998.943	-0.997698	0.204853	-4.8703	1.11428e-06	3.07053e-05
DS10_00008201	6386.97	-1.23916	0.254591	-4.86725	1.13164e-06	3.10962e-05
DS10_00004696	2709.32	-1.93822	0.398519	-4.86356	1.15294e-06	3.14963e-05
DS10_00009619	825.829	1.28801	0.264855	4.86306	1.15583e-06	3.14963e-05
DS10_00012015	48.4692	1.84635	0.379599	4.86396	1.15058e-06	3.14963e-05
DS10_00000443	31615.5	-0.939971	0.193435	-4.85936	1.17768e-06	3.18605e-05
DS10_00005621	1247.42	-1.19955	0.246865	-4.85915	1.17894e-06	3.18605e-05
DS10_00007574	2237.93	0.854507	0.175853	4.8592	1.1786e-06	3.18605e-05
DS10_00005368	452.132	-1.23477	0.254286	-4.85584	1.19876e-06	3.23072e-05
DS10_00003528	10263.7	-1.0063	0.207288	-4.85461	1.20622e-06	3.24193e-05
DS10_00012537	119.37	-1.5859	0.326894	-4.85142	1.2258e-06	3.28553e-05
DS10_00011571	333.069	0.952624	0.196512	4.84766	1.24925e-06	3.33928e-05
DS10_00002664	124.943	2.34299	0.483712	4.84376	1.27405e-06	3.3963e-05
DS10_00000423	12028.4	-1.04541	0.215938	-4.84126	1.29021e-06	3.4208e-05
DS10_00005528	75.7914	1.68292	0.347612	4.84136	1.28953e-06	3.4208e-05
DS10_00005371	1470.32	-0.888241	0.183548	-4.83928	1.30309e-06	3.44563e-05
DS10_00007021	1313.13	-1.14241	0.236234	-4.83591	1.32541e-06	3.49524e-05
DS10_00003288	8462.44	-1.25979	0.260854	-4.82947	1.369e-06	3.60052e-05
DS10_00006652	576.016	0.907952	0.188604	4.81407	1.47883e-06	3.87897e-05
DS10_00003541	3025.47	-1.4554	0.302702	-4.80804	1.5242e-06	3.9873e-05
DS10_00000227	144.122	1.65619	0.344539	4.80698	1.53227e-06	3.98938e-05
DS10_00001038	1168.9	-1.6309	0.339285	-4.80687	1.53313e-06	3.98938e-05
DS10_00006787	1070.81	-1.02487	0.213441	-4.80166	1.57353e-06	4.08368e-05
DS10_00003864	54.4264	1.70268	0.35473	4.79994	1.58715e-06	4.10817e-05
DS10_00009353	1130.76	-0.885594	0.184554	-4.79857	1.598e-06	4.12536e-05
DS10_00005487	15780.3	0.887525	0.185519	4.78401	1.71831e-06	4.4243e-05
DS10_00004153	117.191	-1.8642	0.390007	-4.77993	1.7536e-06	4.50336e-05
DS10_00002388	164.763	-1.64097	0.343621	-4.77553	1.79239e-06	4.59095e-05
DS10_00007732	52.5426	2.15212	0.45086	4.77337	1.81168e-06	4.61846e-05
DS10_00012899	23350.7	-1.01087	0.211778	-4.77327	1.81255e-06	4.61846e-05
DS10_00004628	1319.9	-1.06793	0.223847	-4.77079	1.83501e-06	4.6636e-05
DS10_00007624	8537.94	-0.613303	0.128568	-4.77026	1.83987e-06	4.66386e-05
DS10_00002043	1366.01	-2.00641	0.421185	-4.76373	1.90049e-06	4.8051e-05
DS10_00006475	240.414	-1.53534	0.32236	-4.76283	1.90894e-06	4.81407e-05
DS10_00007379	911.951	-1.14707	0.240927	-4.76107	1.92567e-06	4.84379e-05
DS10_00004637	3171.29	-0.716354	0.150685	-4.75399	1.99441e-06	4.97841e-05
DS10_00005567	279.245	1.01846	0.214222	4.7542	1.99236e-06	4.97841e-05
DS10_00013563	31712.8	-0.859266	0.180708	-4.75501	1.98436e-06	4.97841e-05
DS10_00001856	993.505	0.775004	0.163051	4.75313	2.0029e-06	4.98055e-05
DS10_00011817	3985.34	0.773875	0.162822	4.75288	2.00542e-06	4.98055e-05
DS10_00001118	66.2398	-2.21263	0.465675	-4.75144	2.01969e-06	5.00333e-05
DS10_00000329	193.071	-1.72821	0.363827	-4.7501	2.03316e-06	5.024e-05
DS10_00001037	16684.6	0.883726	0.18608	4.74916	2.0426e-06	5.03466e-05
DS10_00005493	3681.04	-1.07883	0.227242	-4.74747	2.05973e-06	5.06416e-05
DS10_00006245	17774.2	-0.93139	0.196272	-4.7454	2.0809e-06	5.10342e-05
DS10_00006786	5516.57	-0.935858	0.197353	-4.74205	2.11562e-06	5.17562e-05
DS10_00007229	17387.6	-0.97333	0.205516	-4.73603	2.17945e-06	5.31852e-05
DS10_00011483	725.905	-1.35708	0.286623	-4.73473	2.19351e-06	5.33953e-05
DS10_00000793	5020.26	-0.756	0.159896	-4.72807	2.26669e-06	5.50401e-05
DS10_00010806	944.178	-1.00306	0.212196	-4.72706	2.2779e-06	5.51758e-05
DS10_00009975	2036.24	-0.667299	0.14119	-4.72624	2.2871e-06	5.52622e-05
DS10_00000292	42.0409	-2.12493	0.450601	-4.71577	2.408e-06	5.78982e-05
DS10_00002353	254.867	-1.56384	0.331594	-4.71613	2.40373e-06	5.78982e-05
DS10_00013346	97.3015	-1.72751	0.367254	-4.70386	2.55291e-06	6.12324e-05
DS10_00000798	1057.49	0.70943	0.150835	4.70335	2.55932e-06	6.12363e-05
DS10_00009477	905.37	-1.36009	0.289537	-4.69747	2.63409e-06	6.28721e-05
DS10_00003449	607.748	-0.992217	0.211996	-4.68036	2.86377e-06	6.81882e-05
DS10_00011820	9767.78	-0.845543	0.180684	-4.67968	2.87325e-06	6.82485e-05
DS10_00008006	310.812	-1.02621	0.21955	-4.67417	2.95147e-06	6.9937e-05
DS10_00012948	1774.72	1.42406	0.304881	4.67087	2.99926e-06	7.08982e-05
DS10_00008932	1359.95	-0.607508	0.13019	-4.66633	3.06622e-06	7.23067e-05
DS10_00008816	24279.4	-0.897762	0.192433	-4.66533	3.08119e-06	7.24855e-05
DS10_00008791	1117.9	-0.798899	0.171364	-4.66199	3.13161e-06	7.34954e-05
DS10_00005715	526.254	1.21344	0.260381	4.66024	3.15834e-06	7.39459e-05
DS10_00002220	10759.4	-0.979092	0.210196	-4.658	3.19299e-06	7.4579e-05
DS10_00005291	549.088	-1.0487	0.225217	-4.65642	3.21762e-06	7.47044e-05
DS10_00006856	9879.63	0.988919	0.212388	4.65619	3.2212e-06	7.47044e-05
DS10_00011740	17.5926	2.28647	0.491029	4.65649	3.21646e-06	7.47044e-05
DS10_00012710	243.205	-1.04626	0.224752	-4.65517	3.23708e-06	7.48958e-05
DS10_00005730	7741.57	-1.10415	0.237283	-4.65328	3.26695e-06	7.5409e-05
DS10_00007119	3970.96	0.709829	0.152928	4.6416	3.45723e-06	7.96136e-05
DS10_00005837	23009.1	-0.902731	0.194589	-4.63917	3.49805e-06	8.03651e-05
DS10_00002987	331.184	-1.23428	0.266197	-4.63672	3.53983e-06	8.1135e-05
DS10_00007248	2312.02	-0.754662	0.162851	-4.63407	3.58545e-06	8.1989e-05
DS10_00011793	562.226	-1.25717	0.271513	-4.63023	3.65267e-06	8.33318e-05
DS10_00005801	1637.6	-1.16982	0.252814	-4.62721	3.70617e-06	8.43562e-05
DS10_00004840	1330.32	-1.21352	0.26234	-4.62574	3.73264e-06	8.47621e-05
DS10_00006192	2257.04	0.562441	0.12167	4.62268	3.78808e-06	8.58224e-05
DS10_00009134	1365.55	-0.745662	0.161373	-4.62073	3.82383e-06	8.64327e-05
DS10_00008178	535.581	0.685443	0.148359	4.62016	3.83451e-06	8.64749e-05
DS10_00012475	11329.3	-0.809648	0.175275	-4.6193	3.85042e-06	8.66345e-05
DS10_00013162	11300	-0.807697	0.175174	-4.61084	4.01048e-06	9.00293e-05
DS10_00003370	20516.2	-0.796871	0.172916	-4.60842	4.05748e-06	9.03722e-05
DS10_00003829	6091.03	-0.687268	0.149113	-4.60905	4.04508e-06	9.03722e-05
DS10_00008288	11207.5	-2.22161	0.48204	-4.60876	4.05071e-06	9.03722e-05
DS10_00011697	230.703	-1.82588	0.396228	-4.60815	4.0626e-06	9.03722e-05
DS10_00006684	897.551	-0.801267	0.173993	-4.60517	4.12122e-06	9.14688e-05
DS10_00005944	5918.75	-0.68739	0.149414	-4.60058	4.21313e-06	9.32975e-05
DS10_00005738	9086.05	-1.23113	0.26819	-4.5905	4.42191e-06	9.77003e-05
DS10_00011954	257.731	-1.24012	0.270546	-4.58378	4.56645e-06	0.000100667
DS10_00011228	4518.66	-1.25568	0.274109	-4.58095	4.62858e-06	0.000101808
DS10_00009638	145.594	1.66324	0.363416	4.5767	4.72379e-06	0.00010367
DS10_00000103	8525.86	0.927869	0.203262	4.5649	4.99729e-06	0.000109184
DS10_00008399	412.122	-1.27653	0.279616	-4.56528	4.98826e-06	0.000109184
DS10_00007721	20293.7	-0.884162	0.193887	-4.56018	5.11089e-06	0.000111417
DS10_00001175	16774.3	-0.923198	0.202513	-4.55871	5.14699e-06	0.000111956
DS10_00000937	541.455	-1.96132	0.430834	-4.55238	5.30415e-06	0.000114612
DS10_00002071	200.898	1.03807	0.228027	4.5524	5.30385e-06	0.000114612
DS10_00006988	1326.41	-1.16079	0.254934	-4.5533	5.28111e-06	0.000114612
DS10_00002763	145.989	-1.23809	0.272028	-4.55133	5.33072e-06	0.000114782
DS10_00003209	1453.31	1.05805	0.23248	4.55115	5.33542e-06	0.000114782
DS10_00005480	22727.9	-0.861087	0.18941	-4.54616	5.4634e-06	0.000117278
DS10_00003400	8536.21	-0.505131	0.111311	-4.53801	5.67884e-06	0.000121636
DS10_00010856	3864.21	-0.908289	0.200255	-4.53566	5.74249e-06	0.000122732
DS10_00002078	378.533	-1.44337	0.318437	-4.53265	5.82482e-06	0.000124221
DS10_00012945	612.997	-1.98186	0.437307	-4.53197	5.84369e-06	0.000124353
DS10_00006393	24986.5	-0.901904	0.199269	-4.52607	6.009e-06	0.000127594
DS10_00000455	4686.02	0.687839	0.152085	4.52273	6.10482e-06	0.000129348
DS10_00004713	2251.08	-0.714283	0.15797	-4.52163	6.13639e-06	0.000129737
DS10_00006193	2174.12	-1.58971	0.35167	-4.52045	6.17076e-06	0.000130183
DS10_00003137	666.181	-0.824818	0.182502	-4.51949	6.19884e-06	0.000130495
DS10_00012993	235.664	-0.914213	0.202341	-4.51819	6.23718e-06	0.000131021
DS10_00011232	190.854	-1.26312	0.279612	-4.5174	6.26048e-06	0.000131229
DS10_00004545	1593.29	-1.1941	0.264422	-4.5159	6.30472e-06	0.000131875
DS10_00012210	88.0284	-1.78337	0.395056	-4.51423	6.35479e-06	0.000132639
DS10_00011113	18.709	-2.20553	0.489333	-4.50721	6.56871e-06	0.000136813
DS10_00002697	661.955	-0.964843	0.214173	-4.50498	6.6379e-06	0.000137961
DS10_00001045	532.8	-1.44929	0.321999	-4.50093	6.76571e-06	0.000140321
DS10_00010411	280.794	1.31883	0.293252	4.49725	6.88364e-06	0.000142465
DS10_00004989	2517.62	-1.00825	0.224279	-4.4955	6.94054e-06	0.00014334
DS10_00004892	472.411	1.53543	0.341619	4.49456	6.97151e-06	0.000143376
DS10_00012588	1303.92	-0.847579	0.188577	-4.4946	6.97024e-06	0.000143376
DS10_00000203	1531.75	0.657681	0.146382	4.49291	7.02566e-06	0.000144188
DS10_00012658	27.7696	-2.19459	0.488542	-4.49212	7.05192e-06	0.000144425
DS10_00004155	111.329	1.70503	0.379638	4.4912	7.08235e-06	0.000144746
DS10_00010768	1845.62	0.629795	0.140245	4.49068	7.09964e-06	0.000144797
DS10_00000677	24496.6	-0.911277	0.202998	-4.48908	7.15299e-06	0.000145583
DS10_00001675	10661.4	-0.890074	0.198424	-4.48572	7.26679e-06	0.000147593
DS10_00002169	1390.51	-0.782363	0.174484	-4.48386	7.33047e-06	0.000148578
DS10_00003785	2819.07	0.647903	0.144572	4.48153	7.41082e-06	0.000149897
DS10_00012481	16411.3	-0.884857	0.197471	-4.48095	7.43104e-06	0.000149997
DS10_00006397	69.3266	1.863	0.415956	4.47882	7.50552e-06	0.000150571
DS10_00008154	2302.96	-0.53335	0.119081	-4.47888	7.50367e-06	0.000150571
DS10_00010732	395.826	-1.75944	0.392826	-4.47893	7.5019e-06	0.000150571
DS10_00005842	11704.4	-1.01898	0.227589	-4.47727	7.56044e-06	0.000151363
DS10_00000003	8410.84	-0.734119	0.164057	-4.47477	7.64929e-06	0.000152796
DS10_00002723	21444.2	1.02554	0.229203	4.47438	7.66316e-06	0.000152796
DS10_00011151	6297.84	-0.895302	0.200206	-4.47191	7.7525e-06	0.000154264
DS10_00008942	65.0182	-1.63241	0.365585	-4.4652	7.99927e-06	0.000158852
DS10_00010677	38.2769	-2.0599	0.461776	-4.46081	8.16498e-06	0.000161489
DS10_00012656	101.518	1.48219	0.332252	4.46104	8.15613e-06	0.000161489
DS10_00004268	501.805	-0.960301	0.215609	-4.45389	8.43271e-06	0.000166448
DS10_00000591	782.275	-1.42144	0.319373	-4.45071	8.55854e-06	0.000168593
DS10_00008529	10801.1	-0.895635	0.201297	-4.44931	8.6146e-06	0.000169357
DS10_00012000	763.686	-0.835352	0.188281	-4.43674	9.13318e-06	0.000179193
DS10_00012464	260.774	-1.07072	0.241544	-4.43283	9.30053e-06	0.000182112
DS10_00006178	345.93	-0.703652	0.15882	-4.4305	9.40153e-06	0.000183723
DS10_00008724	618.259	1.04666	0.236266	4.43	9.42312e-06	0.000183779
DS10_00007954	2641.9	0.74258	0.16777	4.42618	9.59155e-06	0.000186693
DS10_00006650	1025.26	0.771595	0.174519	4.42126	9.81253e-06	0.000190616
DS10_00008623	581.718	1.21839	0.275973	4.41487	1.01069e-05	0.000195787
DS10_00009594	498.499	-1.00392	0.22743	-4.4142	1.01386e-05	0.000195787
DS10_00011587	8365.29	-0.937926	0.212471	-4.41437	1.01305e-05	0.000195787
DS10_00003865	2319	-0.704529	0.159774	-4.40953	1.03597e-05	0.000199663
DS10_00012334	171.085	-1.87871	0.426563	-4.4043	1.06126e-05	0.000204136
DS10_00000262	11202.5	-0.870975	0.197829	-4.40267	1.06927e-05	0.000205275
DS10_00008390	2315.45	0.890633	0.202412	4.4001	1.08203e-05	0.000207318
DS10_00009456	616.947	-1.04777	0.238396	-4.39507	1.10737e-05	0.000211761
DS10_00012845	76.4909	-1.77447	0.404107	-4.39109	1.12785e-05	0.000215256
DS10_00006565	4019.12	0.843581	0.192423	4.38399	1.16523e-05	0.00022196
DS10_00000213	1787.06	-1.21021	0.276104	-4.38315	1.16977e-05	0.000222393
DS10_00012408	963.482	-0.581437	0.132675	-4.38242	1.17368e-05	0.000222705
DS10_00000602	1108.6	-1.08259	0.247097	-4.38125	1.18003e-05	0.000223476
DS10_00000353	2040.75	0.608088	0.139073	4.37245	1.2286e-05	0.000231874
DS10_00008675	457.52	-0.944401	0.215993	-4.37236	1.2291e-05	0.000231874
DS10_00009442	21.5982	-2.13225	0.487975	-4.36958	1.24487e-05	0.000233949
DS10_00010256	3082.88	0.682945	0.156292	4.36968	1.24427e-05	0.000233949
DS10_00013518	21407.5	-0.939688	0.215248	-4.36561	1.26766e-05	0.000237777
DS10_00011805	5131.91	-0.622321	0.142658	-4.36234	1.2868e-05	0.000240906
DS10_00000253	5370.58	0.811567	0.186178	4.35908	1.3061e-05	0.000244054
DS10_00003802	1399.43	-1.12869	0.259121	-4.35582	1.32571e-05	0.000247247
DS10_00003167	750.575	0.669948	0.154069	4.34835	1.37164e-05	0.000255328
DS10_00003602	1018.13	-0.734635	0.169029	-4.34621	1.38508e-05	0.000257341
DS10_00001965	123.634	-1.17283	0.269936	-4.34485	1.39369e-05	0.000258452
DS10_00009088	3269.23	-0.785867	0.180968	-4.34258	1.40821e-05	0.000260652
DS10_00007040	4718.96	0.967785	0.22293	4.34121	1.41703e-05	0.00026179
DS10_00006586	99.9514	-2.12402	0.489936	-4.33531	1.45556e-05	0.000267418
DS10_00006990	4757.38	-0.885658	0.204286	-4.33539	1.45503e-05	0.000267418
DS10_00012811	408.092	-0.838235	0.193351	-4.33529	1.45567e-05	0.000267418
DS10_00011698	503.952	-0.99681	0.229961	-4.33469	1.45968e-05	0.000267654
DS10_00000518	156.845	-1.69928	0.392219	-4.33248	1.47441e-05	0.000269849
DS10_00008139	11.4742	2.12261	0.490437	4.328	1.50468e-05	0.000274877
DS10_00006754	1428.87	-1.05542	0.243978	-4.32589	1.51918e-05	0.000277009
DS10_00008673	3168.04	-0.68333	0.158547	-4.30995	1.63292e-05	0.000297198
DS10_00002242	983.004	-0.691386	0.160471	-4.30848	1.6438e-05	0.000298624
DS10_00007582	112.387	1.14165	0.265045	4.3074	1.65185e-05	0.000299531
DS10_00011124	8025.36	-2.11246	0.490967	-4.30265	1.68767e-05	0.000305462
DS10_00003515	49.7785	-1.77478	0.412609	-4.30136	1.6975e-05	0.000306676
DS10_00004692	2217.5	-1.03012	0.239639	-4.29864	1.7185e-05	0.000309898
DS10_00004162	529.677	-1.09449	0.254691	-4.29735	1.72854e-05	0.000311138
DS10_00003228	3701.71	-0.749578	0.174451	-4.29678	1.73297e-05	0.000311363
DS10_00002582	15796.3	-1.38235	0.322894	-4.28112	1.85954e-05	0.000333494
DS10_00006960	17313.7	-0.840095	0.19627	-4.2803	1.86639e-05	0.000333503
DS10_00007141	127.352	1.55463	0.363175	4.28068	1.86326e-05	0.000333503
DS10_00003823	110.661	1.14295	0.267136	4.27854	1.88127e-05	0.000335549
DS10_00008651	201.186	-1.7993	0.420602	-4.27792	1.88651e-05	0.000335874
DS10_00007868	2618.04	-0.650717	0.152193	-4.27561	1.90616e-05	0.000338758
DS10_00001226	2857.28	-1.00563	0.23528	-4.27418	1.91838e-05	0.000340313
DS10_00012158	5547.37	-1.37207	0.321588	-4.26654	1.98525e-05	0.00035154
DS10_00009937	1819.14	-0.820192	0.192279	-4.26564	1.99329e-05	0.000352327
DS10_00001349	7924.49	1.14673	0.268854	4.26524	1.99689e-05	0.000352329
DS10_00007886	3081.1	0.594374	0.139411	4.26347	2.01275e-05	0.00035449
DS10_00012284	407.77	-1.36017	0.319225	-4.26085	2.03649e-05	0.000358029
DS10_00010723	71.0328	1.6003	0.375692	4.25961	2.04786e-05	0.000359382
DS10_00000868	4193.8	-0.8835	0.207575	-4.25629	2.0785e-05	0.000363664
DS10_00007590	23760.5	-1.15194	0.270653	-4.25616	2.07967e-05	0.000363664
DS10_00003349	8890.69	-0.814795	0.191521	-4.25433	2.09673e-05	0.000365994
DS10_00010177	6772.23	0.785597	0.18476	4.25198	2.11888e-05	0.000369205
DS10_00004539	795.508	1.51358	0.356657	4.24379	2.19779e-05	0.000382275
DS10_00001216	317.881	-0.850075	0.200731	-4.23489	2.28666e-05	0.000397028
DS10_00006495	248.912	-0.920706	0.217863	-4.22608	2.37793e-05	0.000412146
DS10_00004194	194.617	0.984356	0.233182	4.2214	2.42786e-05	0.000420058
DS10_00005322	49.0433	1.6194	0.383775	4.21966	2.44667e-05	0.000422567
DS10_00003577	8728.39	-1.20436	0.285555	-4.21762	2.46896e-05	0.000425669
DS10_00009090	2449.01	-0.58598	0.13921	-4.20931	2.56147e-05	0.000440071
DS10_00011402	480.367	0.847256	0.20127	4.20955	2.55881e-05	0.000440071
DS10_00003838	233.545	1.39809	0.332246	4.20801	2.57631e-05	0.000441846
DS10_00006184	974.341	0.765645	0.182103	4.20447	2.61691e-05	0.000448026
DS10_00012380	617.689	1.16565	0.277361	4.20262	2.6384e-05	0.000450919
DS10_00001607	4383.58	-0.806094	0.191988	-4.19868	2.6848e-05	0.00045805
DS10_00000987	7292.43	-0.965507	0.230326	-4.19191	2.76616e-05	0.000471111
DS10_00005153	1950.95	-0.665715	0.158975	-4.18755	2.81982e-05	0.000477762
DS10_00010788	5724.26	0.506813	0.121019	4.1879	2.8155e-05	0.000477762
DS10_00012353	544.747	0.738996	0.176467	4.18772	2.8177e-05	0.000477762
DS10_00000864	57.7771	-1.78406	0.42627	-4.18528	2.8482e-05	0.000481739
DS10_00010736	36.1858	-2.03104	0.485346	-4.18473	2.8551e-05	0.000482075
DS10_00002798	58.7169	-2.05203	0.490616	-4.18256	2.8825e-05	0.000485865
DS10_00007396	433.904	-0.722888	0.172897	-4.18104	2.90177e-05	0.000488274
DS10_00007687	7995.24	0.745247	0.178262	4.18062	2.90713e-05	0.000488339
DS10_00003759	4334.03	0.605626	0.144892	4.17985	2.91704e-05	0.000489166
DS10_00003248	3025.63	0.977091	0.233919	4.17704	2.95323e-05	0.000494388
DS10_00012654	22.2348	-1.79399	0.42955	-4.17645	2.96097e-05	0.000494841
DS10_00000107	91.294	1.47019	0.352353	4.17249	3.01284e-05	0.000502198
DS10_00008284	640.778	-1.13671	0.27244	-4.17231	3.01524e-05	0.000502198
DS10_00008232	1413.22	-0.989856	0.23766	-4.16501	3.11339e-05	0.000517667
DS10_00005300	345.671	-0.766566	0.184107	-4.1637	3.13137e-05	0.000519775
DS10_00012087	941.07	0.69521	0.167066	4.1613	3.16448e-05	0.000524384
DS10_00007869	20030.4	-0.906937	0.218134	-4.15771	3.21447e-05	0.000531769
DS10_00004427	737.644	-0.692766	0.166751	-4.1545	3.25994e-05	0.000538384
DS10_00008662	62.9609	-1.89196	0.455754	-4.15128	3.30621e-05	0.000545107
DS10_00008402	8286.47	-1.03591	0.249665	-4.14921	3.33627e-05	0.000549142
DS10_00006845	386.948	-1.13211	0.27297	-4.14736	3.36324e-05	0.000552653
DS10_00005733	1007.46	-1.40147	0.338397	-4.14151	3.45031e-05	0.000566012
DS10_00001874	1159.11	-0.829358	0.200346	-4.13962	3.47881e-05	0.000569736
DS10_00006179	2556.44	-0.706212	0.170649	-4.13839	3.49748e-05	0.000571837
DS10_00000571	182.52	-1.14126	0.276188	-4.13218	3.59334e-05	0.000585559
DS10_00002296	2812.29	-0.91636	0.221745	-4.1325	3.58838e-05	0.000585559
DS10_00001275	1012.12	-1.31465	0.318392	-4.12902	3.64316e-05	0.000591983
DS10_00002465	1352.21	0.627428	0.15196	4.12891	3.64483e-05	0.000591983
DS10_00010409	813.647	1.28794	0.312238	4.12488	3.70927e-05	0.000601454
DS10_00000145	794.322	-1.311	0.317989	-4.1228	3.74301e-05	0.000605923
DS10_00005329	589.183	0.782736	0.189973	4.12026	3.78446e-05	0.000611624
DS10_00004959	2187.83	-1.32025	0.32085	-4.11483	3.87462e-05	0.000624139
DS10_00012333	1118.46	-1.41778	0.344544	-4.11496	3.87243e-05	0.000624139
DS10_00001496	156.429	-1.55121	0.377163	-4.11285	3.90799e-05	0.000628064
DS10_00009005	184.361	1.02751	0.249844	4.11263	3.91179e-05	0.000628064
DS10_00005189	4352.6	-0.863871	0.210535	-4.10322	4.07443e-05	0.000653107
DS10_00009121	1362.89	0.928118	0.226365	4.10009	4.12983e-05	0.000660907
DS10_00001674	6184.91	-0.858019	0.209685	-4.09194	4.27777e-05	0.000682874
DS10_00004905	1890.23	-1.1233	0.274528	-4.09177	4.28101e-05	0.000682874
DS10_00001280	388.295	1.00721	0.24625	4.09018	4.3104e-05	0.000685326
DS10_00010575	30.4988	-1.97107	0.481895	-4.09024	4.3092e-05	0.000685326
DS10_00011368	6913.59	-0.997517	0.243903	-4.08981	4.31734e-05	0.000685326
DS10_00005214	7597.92	0.994123	0.243207	4.08756	4.35933e-05	0.000690873
DS10_00012499	12.5597	1.99661	0.48909	4.0823	4.4592e-05	0.00070556
DS10_00011344	668.293	-0.821581	0.201477	-4.0778	4.54639e-05	0.000718198
DS10_00010519	844.304	-0.789273	0.193944	-4.06959	4.70955e-05	0.000742776
DS10_00006594	23292.5	-1.0998	0.270583	-4.06456	4.81221e-05	0.00075775
DS10_00002860	1635.64	-1.03399	0.254807	-4.05793	4.95106e-05	0.000778364
DS10_00002240	38.1116	-1.71304	0.422843	-4.05125	5.0944e-05	0.00079834
DS10_00002986	889.179	-1.36705	0.337433	-4.05132	5.09305e-05	0.00079834
DS10_00003152	583.347	0.740566	0.182883	4.04939	5.1351e-05	0.000802154
DS10_00005737	7347.93	-0.9581	0.236602	-4.04942	5.13443e-05	0.000802154
DS10_00010897	196.959	-0.850944	0.21026	-4.0471	5.18556e-05	0.000808749
DS10_00000374	23735.1	-0.787441	0.194828	-4.04172	5.3061e-05	0.000826236
DS10_00006638	8784.63	-0.836975	0.207117	-4.04107	5.32084e-05	0.000827217
DS10_00002052	21251.6	0.494993	0.122545	4.03929	5.36125e-05	0.000832182
DS10_00002505	121.532	1.87115	0.46335	4.03831	5.38382e-05	0.000834364
DS10_00001526	145.574	1.2509	0.309981	4.03541	5.45074e-05	0.000843402
DS10_00006102	254.43	-1.33862	0.332082	-4.03099	5.55423e-05	0.000858062
DS10_00001156	10382.4	0.49725	0.12337	4.03056	5.56446e-05	0.000858195
DS10_00012335	1150.82	-1.17894	0.292525	-4.03022	5.57258e-05	0.000858195
DS10_00003353	212.804	1.02541	0.254761	4.02498	5.69799e-05	0.000876132
DS10_00003969	8750.81	0.909461	0.226049	4.0233	5.73895e-05	0.00088105
DS10_00002298	18549	-0.853426	0.212167	-4.02242	5.76029e-05	0.000882945
DS10_00010592	258.492	1.11603	0.277577	4.02061	5.80472e-05	0.000888367
DS10_00002643	972.039	-1.39909	0.348042	-4.01988	5.82278e-05	0.000889743
DS10_00010694	1337.61	1.17691	0.293139	4.01486	5.94819e-05	0.000907493
DS10_00007464	8904.68	0.453086	0.11287	4.01423	5.9639e-05	0.000908475
DS10_00000381	1647.21	0.994724	0.247901	4.01259	6.00569e-05	0.000913424
DS10_00007835	550.156	1.26199	0.314628	4.01105	6.04498e-05	0.000917976
DS10_00004385	8409.01	-0.7859	0.195979	-4.01011	6.06893e-05	0.000920188
DS10_00003283	103.071	-1.54727	0.385882	-4.0097	6.07947e-05	0.000920364
DS10_00005879	13339.5	0.892579	0.223094	4.0009	6.3101e-05	0.000953807
DS10_00012420	6726.26	0.602338	0.150616	3.99917	6.35639e-05	0.000959326
DS10_00010368	62.2391	1.42017	0.355426	3.99568	6.45097e-05	0.000971723
DS10_00012768	3006.68	-0.659473	0.165058	-3.99541	6.45834e-05	0.000971723
DS10_00013208	114.873	-1.44236	0.361119	-3.99414	6.49307e-05	0.000975452
DS10_00007343	292.119	-1.0541	0.263975	-3.99319	6.51893e-05	0.000977839
DS10_00002717	1526.8	-1.01775	0.255071	-3.99008	6.60511e-05	0.000989253
DS10_00003311	1044.27	-1.11325	0.279158	-3.98788	6.66677e-05	0.000996966
DS10_00006886	7099.01	-1.33115	0.333923	-3.98641	6.70802e-05	0.000997333
DS10_00007512	22560.4	1.10525	0.277212	3.98702	6.69085e-05	0.000997333
DS10_00008829	7547.49	-1.4187	0.355876	-3.98651	6.70528e-05	0.000997333
DS10_00010220	1824.12	-0.642592	0.161198	-3.98635	6.70988e-05	0.000997333
DS10_00004444	72.5836	1.90067	0.476976	3.98484	6.75267e-05	0.00100217
DS10_00008661	37.8242	-1.87861	0.471546	-3.98394	6.77813e-05	0.00100443
DS10_00001872	1842.9	-0.488841	0.122749	-3.98243	6.82132e-05	0.00100931
DS10_00003766	402.623	-0.733199	0.184395	-3.97625	7.00105e-05	0.00103434
DS10_00000767	810.859	-1.34907	0.33982	-3.96996	7.18848e-05	0.00106044
DS10_00000306	248.981	-0.81381	0.205135	-3.96719	7.2726e-05	0.00107123
DS10_00001816	408.631	0.903692	0.227892	3.96544	7.32618e-05	0.00107598
DS10_00005866	7280.78	0.427058	0.107696	3.96542	7.32678e-05	0.00107598
DS10_00007897	407.728	1.233	0.311009	3.9645	7.355e-05	0.00107851
DS10_00006566	83.4893	-1.25915	0.317781	-3.96232	7.42248e-05	0.00108678
DS10_00011589	864.703	0.602728	0.152256	3.95866	7.53721e-05	0.00110194
DS10_00012651	480.64	0.928376	0.234672	3.95605	7.6199e-05	0.00111237
DS10_00002672	985.719	-0.589938	0.149175	-3.95468	7.66376e-05	0.00111711
DS10_00000508	35523.6	1.14823	0.290466	3.95306	7.71588e-05	0.00112304
DS10_00003901	1276.99	-0.718175	0.181828	-3.94974	7.8235e-05	0.00113533
DS10_00006630	642.616	1.17999	0.298724	3.95009	7.81234e-05	0.00113533
DS10_00008255	37.7075	-1.70417	0.43255	-3.93982	8.15413e-05	0.00118157
DS10_00002817	3320.44	-0.82465	0.209591	-3.93457	8.33464e-05	0.00120417
DS10_00002908	1487.88	-0.737282	0.187371	-3.93487	8.32419e-05	0.00120417
DS10_00004426	1273.1	-0.871561	0.221631	-3.93248	8.40733e-05	0.00121288
DS10_00013514	286.38	-1.2637	0.321461	-3.93111	8.45559e-05	0.00121805
DS10_00002345	1402.83	0.901825	0.229837	3.92376	8.71764e-05	0.00125212
DS10_00003042	184.263	-1.21892	0.310641	-3.92388	8.71352e-05	0.00125212
DS10_00001736	3936.72	-1.11684	0.284774	-3.92184	8.78736e-05	0.00126029
DS10_00009030	70310.9	0.85627	0.218434	3.92003	8.85369e-05	0.00126795
DS10_00005942	454.399	0.701715	0.179107	3.91785	8.93426e-05	0.00127762
DS10_00012092	1620.86	-0.688516	0.175784	-3.91683	8.97206e-05	0.00128116
DS10_00010100	706.929	-0.909685	0.232739	-3.90861	9.28303e-05	0.00132364
DS10_00000858	411.132	0.789475	0.202063	3.90707	9.34236e-05	0.00133017
DS10_00010895	1313.21	-0.652786	0.167105	-3.90645	9.36636e-05	0.00133165
DS10_00009421	144.257	-1.41716	0.363084	-3.90312	9.49615e-05	0.00134815
DS10_00007210	517.909	-1.03433	0.265321	-3.89843	9.68177e-05	0.00137252
DS10_00002237	6028.58	0.703258	0.180444	3.89738	9.72376e-05	0.00137648
DS10_00011543	1354.57	-0.6745	0.173143	-3.89561	9.79508e-05	0.00138458
DS10_00007403	813.153	0.614038	0.15768	3.8942	9.85243e-05	0.00139068
DS10_00004080	2106.62	-0.572051	0.146913	-3.8938	9.86857e-05	0.00139096
DS10_00008911	9246.31	-1.38315	0.355325	-3.89263	9.91652e-05	0.00139571
DS10_00004138	298.406	1.18454	0.304499	3.89011	0.000100199	0.00140824
DS10_00008488	2724.22	-0.709493	0.182524	-3.88711	0.000101445	0.00142371
DS10_00012265	49424.6	-1.15327	0.296816	-3.88547	0.00010213	0.00143128
DS10_00005735	1382.57	-1.05683	0.272387	-3.87988	0.000104509	0.00145837
DS10_00006171	3439.49	0.710037	0.182975	3.88051	0.000104239	0.00145837
DS10_00011763	153.081	-1.57371	0.40559	-3.88006	0.000104431	0.00145837
DS10_00005691	156.69	1.47599	0.380781	3.87621	0.000106095	0.0014784
DS10_00002525	396.776	0.711329	0.183638	3.87354	0.000107267	0.00149261
DS10_00009481	2742.15	0.871823	0.225249	3.87048	0.000108621	0.00150931
DS10_00008205	1555.26	-1.1416	0.295333	-3.86548	0.000110871	0.00153839
DS10_00007856	14.2532	-1.86582	0.482804	-3.86455	0.000111294	0.00154208
DS10_00005581	868.072	-1.07175	0.277405	-3.86349	0.00011178	0.00154663
DS10_00001401	168.809	-1.16229	0.301014	-3.86125	0.000112807	0.00155864
DS10_00011441	4011.41	-0.534881	0.138609	-3.85891	0.000113894	0.00157145
DS10_00009595	4241.63	-0.904218	0.234616	-3.85403	0.000116188	0.00160085
DS10_00001860	1759.86	-0.745687	0.193579	-3.8521	0.000117108	0.001609
DS10_00012919	513.083	-0.890458	0.231147	-3.85234	0.000116994	0.001609
DS10_00004550	63.5571	-1.71195	0.444886	-3.84806	0.000119057	0.00163349
DS10_00008238	8454.21	0.516916	0.13438	3.84668	0.000119727	0.00164039
DS10_00003738	141.235	0.942871	0.245524	3.84024	0.000122916	0.00168174
DS10_00008000	1160.8	-1.47712	0.384781	-3.83885	0.000123611	0.00168889
DS10_00000432	270.207	1.85984	0.484787	3.8364	0.000124849	0.00170343
DS10_00009512	100.88	-1.65134	0.430499	-3.83587	0.00012512	0.00170476
DS10_00004631	768.015	-1.08217	0.282195	-3.83484	0.000125647	0.00170956
DS10_00000475	6784.78	-0.883889	0.230511	-3.83448	0.000125832	0.00170972
DS10_00009850	798.12	-0.62516	0.16318	-3.8311	0.000127572	0.00173096
DS10_00012241	721.2	-0.746568	0.19493	-3.82993	0.000128179	0.00173679
DS10_00001868	138.506	0.920901	0.24052	3.82879	0.000128776	0.00174247
DS10_00001219	757.902	0.533209	0.139329	3.82697	0.000129729	0.00175295
DS10_00002630	623.863	-0.680971	0.177981	-3.82609	0.000130196	0.00175684
DS10_00000780	1230.75	1.02389	0.267656	3.82541	0.000130554	0.00175925
DS10_00002323	3168.42	-0.591079	0.154915	-3.81551	0.000135901	0.00182879
DS10_00011944	4818.19	-1.21566	0.31877	-3.8136	0.000136959	0.0018405
DS10_00011386	28.4073	-1.77757	0.466437	-3.81095	0.000138436	0.0018578
DS10_00007488	2407.02	-0.67906	0.178223	-3.81018	0.000138867	0.00186105
DS10_00003832	778.088	-1.09237	0.286742	-3.80957	0.000139206	0.00186304
DS10_00010991	219.793	-1.11077	0.291786	-3.8068	0.000140778	0.00188152
DS10_00012213	1231	0.988528	0.259706	3.80633	0.000141044	0.00188251
DS10_00007042	41.6054	-1.85686	0.488893	-3.7981	0.000145808	0.00194344
DS10_00011203	682.333	-0.865153	0.228035	-3.79395	0.000148267	0.00197354
DS10_00002357	399.215	-0.691299	0.182326	-3.79154	0.000149714	0.0019901
DS10_00008363	1785.67	-0.42692	0.112626	-3.7906	0.000150283	0.00199496
DS10_00005599	498.368	-1.19561	0.315782	-3.78617	0.000152985	0.00202809
DS10_00002247	2478.46	-0.976269	0.257971	-3.78442	0.000154067	0.00203967
DS10_00001626	32182.3	-0.667384	0.176369	-3.78402	0.000154313	0.00204017
DS10_00010116	1109.59	1.28395	0.339426	3.78272	0.000155124	0.00204813
DS10_00010718	21.7307	1.69716	0.448766	3.78183	0.00015568	0.00205272
DS10_00010885	13229.3	0.463083	0.122541	3.77902	0.00015745	0.00207327
DS10_00012546	283.738	-1.23105	0.326001	-3.77623	0.000159222	0.00209379
DS10_00009759	333.275	-0.738626	0.195643	-3.77538	0.000159765	0.00209531
DS10_00011623	1431.77	-0.65884	0.174501	-3.77558	0.000159638	0.00209531
DS10_00004877	25.0395	-1.76986	0.468842	-3.77495	0.000160038	0.00209609
DS10_00001424	1940.62	-1.02908	0.272809	-3.77216	0.000161839	0.00211686
DS10_00009566	457.392	-1.12186	0.297504	-3.77089	0.000162665	0.00212483
DS10_00009812	9.05905	1.83028	0.485855	3.76712	0.000165143	0.00215432
DS10_00009540	2744.47	-0.583006	0.154924	-3.76316	0.000167777	0.00218579
DS10_00007331	8927.53	-1.00117	0.266129	-3.76195	0.000168591	0.00219348
DS10_00005682	3613.16	-0.643899	0.171215	-3.76076	0.0001694	0.00220108
DS10_00005860	3198.85	0.60507	0.160934	3.75974	0.000170089	0.0022071
DS10_00000728	450.132	-1.18541	0.315653	-3.75543	0.000173043	0.00223951
DS10_00002674	681.678	-0.823489	0.219266	-3.75567	0.000172881	0.00223951
DS10_00007142	53037.7	-0.823885	0.219515	-3.75321	0.000174585	0.00225649
DS10_00004976	32.8684	1.81972	0.485466	3.74839	0.000177975	0.00229728
DS10_00012285	483.333	-1.1442	0.305354	-3.74711	0.000178883	0.00230597
DS10_00005356	1849.95	-0.770724	0.205704	-3.74677	0.000179127	0.00230609
DS10_00010711	2630.78	-0.687403	0.183669	-3.74261	0.000182117	0.00234151
DS10_00008387	1106.76	0.640131	0.171084	3.74162	0.000182834	0.00234765
DS10_00000151	4345.34	-1.02521	0.274189	-3.73906	0.000184708	0.00236861
DS10_00003317	4008.56	-0.783722	0.209667	-3.73795	0.00018553	0.00237605
DS10_00007062	6682.59	0.474828	0.127081	3.73643	0.000186654	0.00238732
DS10_00012782	372.073	0.685317	0.18355	3.73369	0.000188698	0.00241032
DS10_00005789	1554.13	-0.794568	0.212868	-3.73268	0.000189451	0.00241679
DS10_00008492	1598.28	-0.544183	0.145924	-3.72922	0.000192073	0.00244388
DS10_00012799	16351.2	-1.31778	0.353341	-3.72948	0.000191873	0.00244388
DS10_00009396	353.024	-0.917537	0.24622	-3.72649	0.000194163	0.00246727
DS10_00009230	1252.9	-0.639198	0.171658	-3.72366	0.000196354	0.00249189
DS10_00008123	2056.26	-0.747351	0.200853	-3.72088	0.000198526	0.00251621
DS10_00008550	2768.11	-0.86018	0.231411	-3.71711	0.000201513	0.00255077
DS10_00009495	813.016	-1.12733	0.303687	-3.71214	0.000205511	0.00259802
DS10_00007961	30690.5	0.845149	0.227739	3.71105	0.000206403	0.00260594
DS10_00010507	818.743	-0.694165	0.187238	-3.70739	0.000209407	0.00264047
DS10_00007620	6968.61	-0.42015	0.113355	-3.70648	0.000210156	0.00264651
DS10_00002859	339.925	0.931755	0.251424	3.70592	0.000210629	0.00264906
DS10_00011016	454.532	0.789385	0.213041	3.70532	0.000211122	0.00265187
DS10_00008867	104.928	1.33794	0.361199	3.70416	0.000212095	0.00266068
DS10_00006095	421.555	1.02685	0.277612	3.69887	0.000216557	0.00271319
DS10_00004799	708.787	-1.06508	0.28809	-3.69704	0.000218132	0.00272943
DS10_00004456	1330.74	0.898537	0.243119	3.69587	0.000219136	0.0027385
DS10_00003542	319.154	-1.06001	0.286882	-3.69493	0.000219947	0.00274514
DS10_00004588	3647.9	-0.528592	0.143121	-3.69332	0.000221344	0.00275906
DS10_00007029	2763.54	-0.58983	0.159976	-3.68698	0.000226933	0.00282514
DS10_00008782	710.391	-0.553545	0.150461	-3.67899	0.000234159	0.0029114
DS10_00005852	470.703	-0.812686	0.220941	-3.67829	0.000234801	0.0029157
DS10_00008663	41.0779	-1.73547	0.47205	-3.67645	0.0002365	0.00293308
DS10_00004769	5054.7	0.57166	0.15551	3.67603	0.00023689	0.0029342
DS10_00010405	5780.16	-0.731116	0.198956	-3.67475	0.000238079	0.00294521
DS10_00000849	1700.6	-0.887757	0.24168	-3.67328	0.000239462	0.00295859
DS10_00012004	248.237	-0.785077	0.213793	-3.67214	0.000240529	0.00296804
DS10_00003505	836.444	0.974695	0.265486	3.67136	0.00024126	0.00297332
DS10_00002883	348.614	-0.987353	0.268985	-3.67066	0.000241923	0.00297664
DS10_00012567	1906.72	0.747773	0.203729	3.67044	0.000242137	0.00297664
DS10_00001207	57.5146	1.30279	0.354981	3.67003	0.000242518	0.0029776
DS10_00011394	1563.83	0.763766	0.208222	3.66805	0.000244412	0.0029971
DS10_00000509	10762.5	-1.10899	0.30247	-3.66644	0.000245946	0.0030003
DS10_00002673	2299.17	-0.579142	0.15796	-3.66638	0.00024601	0.0030003
DS10_00006324	10781.1	-0.475415	0.129676	-3.66618	0.000246202	0.0030003
DS10_00006911	4229.71	-0.669651	0.182615	-3.66702	0.000245397	0.0030003
DS10_00012391	25559.6	-1.06498	0.290456	-3.6666	0.0002458	0.0030003
DS10_00006876	1557.26	-0.573652	0.156488	-3.6658	0.000246565	0.003001
DS10_00012673	35.2159	-1.63575	0.446377	-3.66451	0.000247814	0.00301246
DS10_00001669	1526.41	-0.681224	0.186077	-3.66098	0.000251248	0.00305043
DS10_00003749	2044	-0.560943	0.153248	-3.66035	0.00025187	0.00305043
DS10_00012966	247.603	1.18042	0.322465	3.66062	0.000251605	0.00305043
DS10_00006909	2706.99	-1.08387	0.296237	-3.65879	0.000253412	0.00306484
DS10_00013446	98.7259	-0.994861	0.271931	-3.65851	0.000253685	0.00306484
DS10_00008253	60.9702	-1.57062	0.429363	-3.65801	0.000254178	0.00306701
DS10_00007639	562.893	1.05583	0.288875	3.65496	0.000257225	0.00309997
DS10_00004118	729.803	-0.656096	0.179589	-3.65331	0.000258876	0.00311605
DS10_00001544	722.552	-0.902165	0.247054	-3.65169	0.000260516	0.00312811
DS10_00003839	1178.68	-1.7944	0.491375	-3.65179	0.000260422	0.00312811
DS10_00009568	138.823	-1.30333	0.357108	-3.64967	0.000262576	0.00314899
DS10_00009135	2453.22	-0.884849	0.242582	-3.64763	0.000264666	0.00316826
DS10_00012113	280.534	0.925888	0.253844	3.64748	0.000264829	0.00316826
DS10_00004274	1246.2	0.936063	0.256792	3.64522	0.000267166	0.00318457
DS10_00005541	97.518	-1.35915	0.372819	-3.6456	0.000266768	0.00318457
DS10_00008713	638.857	-0.749833	0.205699	-3.64529	0.000267087	0.00318457
DS10_00001970	135.663	-1.5343	0.420955	-3.64481	0.000267585	0.00318569
DS10_00013356	13.0613	-1.76524	0.4844	-3.64418	0.000268246	0.00318969
DS10_00002069	949.985	0.644726	0.176988	3.64276	0.000269731	0.00320346
DS10_00004790	32.9137	1.70932	0.469346	3.64192	0.000270608	0.00320999
DS10_00006631	6361	-0.466014	0.128079	-3.63848	0.000274253	0.00324069
DS10_00007197	1964.53	0.469399	0.129005	3.63859	0.00027413	0.00324069
DS10_00007736	644.634	0.8136	0.223611	3.63847	0.000274265	0.00324069
DS10_00011379	621.788	-0.57955	0.159294	-3.63823	0.000274517	0.00324069
DS10_00011003	908.807	1.00264	0.275622	3.63775	0.000275027	0.0032428
DS10_00011351	971.548	-1.10476	0.304217	-3.63147	0.00028181	0.0033188
DS10_00008005	39.4477	-1.28657	0.354563	-3.62861	0.000284956	0.00335182
DS10_00005611	2172.19	-0.717621	0.197854	-3.62702	0.000286708	0.00336436
DS10_00013557	820.071	-1.32004	0.363922	-3.62725	0.000286454	0.00336436
DS10_00011692	1074.16	0.595868	0.164486	3.6226	0.00029166	0.00341838
DS10_00005803	1109.42	-0.679964	0.187756	-3.62153	0.000292861	0.00342836
DS10_00002898	3886.81	0.563475	0.155639	3.62041	0.000294142	0.00343925
DS10_00002427	7079.51	-0.740343	0.204551	-3.61935	0.00029534	0.00344915
DS10_00002208	269.598	0.887183	0.245381	3.61553	0.000299739	0.00349591
DS10_00006243	1009.66	0.790833	0.218749	3.61525	0.000300057	0.00349591
DS10_00003536	3632.71	0.919114	0.254349	3.6136	0.000301979	0.00351414
DS10_00004743	2681.59	-0.58157	0.16102	-3.61178	0.0003041	0.00353462
DS10_00001567	10826.7	0.809829	0.224244	3.61137	0.000304579	0.00353599
DS10_00006775	289.768	1.09715	0.303992	3.60915	0.000307199	0.0035622
DS10_00009143	79.4722	1.25291	0.347187	3.60874	0.000307691	0.00356369
DS10_00007124	1506.11	0.494948	0.137199	3.60751	0.000309151	0.00357638
DS10_00003762	97.3896	1.65324	0.458317	3.6072	0.00030952	0.00357643
DS10_00009193	673.11	0.530028	0.147058	3.6042	0.000313112	0.00361368
DS10_00003727	2093.34	0.397874	0.110412	3.60352	0.000313932	0.00361888
DS10_00005849	9.67165	1.76571	0.490537	3.59956	0.000318761	0.00367024
DS10_00001638	1317.5	0.711664	0.197825	3.59745	0.000321352	0.00369284
DS10_00002102	859.167	-0.684622	0.190321	-3.5972	0.000321665	0.00369284
DS10_00007979	1531.15	0.998859	0.277689	3.59704	0.000321853	0.00369284
DS10_00010135	1253.54	0.539994	0.15015	3.59635	0.000322714	0.00369839
DS10_00006256	753.348	-1.15115	0.320377	-3.59311	0.000326749	0.00374026
DS10_00003800	816.926	0.978301	0.2727	3.58746	0.000333911	0.00381779
DS10_00008140	9.19493	1.73157	0.482783	3.58665	0.00033496	0.00382532
DS10_00002965	13.7346	-1.71745	0.479285	-3.58335	0.00033921	0.00386936
DS10_00007689	135.556	-1.69239	0.472932	-3.5785	0.000345566	0.00393728
DS10_00000611	332.511	-1.29826	0.362859	-3.57787	0.000346403	0.00393767
DS10_00001392	436.916	0.645729	0.180469	3.57806	0.000346151	0.00393767
DS10_00007485	1518.14	-0.7494	0.209493	-3.57721	0.000347277	0.00394304
DS10_00005958	879.48	-0.72728	0.203383	-3.57591	0.000349016	0.00395363
DS10_00008515	397.689	0.553798	0.154869	3.57592	0.000349005	0.00395363
DS10_00007047	5982.87	0.395318	0.110586	3.57475	0.000350564	0.00396659
DS10_00003262	671.588	-1.1089	0.310257	-3.57412	0.000351408	0.00397156
DS10_00010159	39769	-0.779005	0.218001	-3.57341	0.000352367	0.00397781
DS10_00002888	28.2721	-1.45686	0.407931	-3.57134	0.000355154	0.00400467
DS10_00003848	1034.61	0.583663	0.163506	3.56967	0.000357431	0.00402571
DS10_00013157	339.404	0.859717	0.241076	3.56617	0.000362238	0.00407401
DS10_00013304	326.579	-1.17969	0.33082	-3.56594	0.00036255	0.00407401
DS10_00000301	765.478	-1.18601	0.332851	-3.56319	0.000366379	0.00411233
DS10_00006610	108.206	-1.0403	0.292124	-3.56117	0.00036921	0.00413938
DS10_00005284	131.641	1.17058	0.328899	3.55907	0.000372168	0.00416778
DS10_00005761	294.103	-0.716397	0.201307	-3.55873	0.000372652	0.00416844
DS10_00002337	5728.23	-0.731977	0.205729	-3.55796	0.000373742	0.00417111
DS10_00012778	408.064	-0.739221	0.207758	-3.5581	0.000373551	0.00417111
DS10_00009620	14596.1	-0.769559	0.216378	-3.55655	0.00037576	0.00418887
DS10_00009890	1036.69	-0.744371	0.209392	-3.55492	0.000378093	0.0042101
DS10_00007097	3894.54	0.741673	0.208775	3.55251	0.000381581	0.00424362
DS10_00013566	315.856	-0.738244	0.207825	-3.55224	0.000381969	0.00424362
DS10_00000010	331.498	-1.04331	0.293929	-3.54955	0.000385895	0.00427755
DS10_00009068	1970.7	0.501342	0.141232	3.54977	0.000385562	0.00427755
DS10_00012821	1512.72	-1.7375	0.48957	-3.54904	0.000386644	0.00428101
DS10_00002177	426.972	-0.547527	0.154354	-3.54722	0.000389323	0.00430582
DS10_00000316	5142.39	0.661702	0.186581	3.54646	0.000390439	0.00431329
DS10_00006335	598.905	-0.852079	0.240803	-3.53849	0.000402416	0.00444061
DS10_00012182	34.5606	1.37914	0.390023	3.53604	0.000406171	0.004477
DS10_00005539	1812.3	-0.807488	0.228402	-3.53538	0.000407196	0.00448327
DS10_00002385	1396.03	-1.39242	0.393934	-3.53465	0.000408312	0.00449051
DS10_00013373	99.5599	1.12481	0.318296	3.53386	0.000409541	0.00449899
DS10_00012644	903.582	0.73429	0.207935	3.53134	0.000413457	0.00453692
DS10_00003799	1137.93	-0.695501	0.197069	-3.52923	0.000416764	0.0045681
DS10_00008902	7627.38	-1.05425	0.298864	-3.52752	0.000419476	0.0045927
DS10_00009963	214.654	0.691203	0.196152	3.52382	0.000425381	0.00465216
DS10_00001024	965.214	-0.526039	0.149512	-3.51838	0.00043419	0.00474321
DS10_00003820	6876.8	0.674	0.191779	3.51447	0.000440635	0.00480827
DS10_00001671	2526.47	-0.444424	0.126507	-3.51305	0.000442994	0.00482864
DS10_00006514	79618.3	-0.798141	0.22726	-3.51202	0.000444716	0.00484202
DS10_00012686	300.273	0.587193	0.167335	3.50909	0.000449648	0.0048903
DS10_00006588	698.624	-1.66114	0.473715	-3.50663	0.000453828	0.00493029
DS10_00001253	177.323	0.875432	0.249774	3.5049	0.000456784	0.00495691
DS10_00008828	5899.25	-1.13717	0.324501	-3.50437	0.000457683	0.00496119
DS10_00004992	284.182	-0.621842	0.177609	-3.50119	0.000463182	0.00501525
DS10_00008574	252.109	0.918318	0.262326	3.50067	0.000464094	0.00501959
DS10_00010003	4828.66	0.700117	0.200092	3.49897	0.000467062	0.00504612
DS10_00002310	1522.52	-0.547232	0.156428	-3.4983	0.00046823	0.00504762
DS10_00009004	4927.48	0.671963	0.192076	3.49842	0.00046803	0.00504762
DS10_00011833	18.2971	-1.71556	0.490572	-3.49707	0.000470406	0.00506552
DS10_00007069	1403.19	0.461048	0.131886	3.4958	0.000472646	0.00508405
DS10_00006341	927.15	-0.54876	0.157023	-3.49477	0.000474475	0.00509304
DS10_00012687	307.955	0.620587	0.177577	3.49474	0.00047452	0.00509304
DS10_00009145	25402.2	-0.629358	0.180126	-3.49398	0.000475872	0.00510197
DS10_00009093	7566.95	0.546545	0.156676	3.48837	0.000485968	0.00520452
DS10_00000394	3890.4	-0.62211	0.17853	-3.48463	0.000492811	0.00524916
DS10_00001455	9161.51	0.747343	0.214461	3.48475	0.000492595	0.00524916
DS10_00001838	32.1432	1.70679	0.48979	3.48473	0.000492627	0.00524916
DS10_00007184	1661.25	0.417333	0.119762	3.48469	0.00049271	0.00524916
DS10_00007299	487.377	1.19378	0.342504	3.48546	0.0004913	0.00524916
DS10_00007583	634.075	0.671091	0.192646	3.48354	0.000494829	0.00526493
DS10_00000641	6715.85	0.539083	0.154847	3.4814	0.000498805	0.0053015
DS10_00002063	467.025	-0.753853	0.216804	-3.47711	0.000506842	0.00538108
DS10_00009260	132.064	1.02508	0.295201	3.47248	0.000515675	0.00546894
DS10_00001713	135.658	1.10939	0.319816	3.46883	0.000522726	0.00553774
DS10_00004030	1064.73	0.481811	0.138925	3.46815	0.000524061	0.00553992
DS10_00012022	179.789	0.953513	0.274926	3.46825	0.00052386	0.00553992
DS10_00000226	2633.67	1.05612	0.304635	3.46682	0.000526645	0.00555776
DS10_00010617	112.64	0.859433	0.247911	3.4667	0.000526882	0.00555776
DS10_00003571	1199.78	0.711061	0.205135	3.46631	0.000527649	0.00555987
DS10_00000061	154.97	-0.731709	0.211173	-3.46497	0.000530288	0.00557318
DS10_00006874	9036.06	0.569918	0.164472	3.46513	0.000529967	0.00557318
DS10_00009480	955.923	-0.966787	0.279031	-3.4648	0.000530617	0.00557318
DS10_00012694	1742.63	-0.42303	0.122194	-3.46195	0.00053627	0.00562653
DS10_00005414	1499.07	0.754765	0.218074	3.46105	0.000538067	0.00563935
DS10_00006163	146.942	1.0615	0.306746	3.46051	0.000539161	0.00564479
DS10_00002230	549.759	-1.01046	0.292509	-3.45446	0.000551387	0.00576314
DS10_00005692	1780.67	0.787477	0.227967	3.45434	0.00055164	0.00576314
DS10_00010513	9515.19	-1.6743	0.485502	-3.4486	0.000563508	0.00588086
DS10_00000862	3078.85	-0.898193	0.260479	-3.44823	0.000564272	0.00588258
DS10_00006175	606.696	-0.886531	0.257208	-3.44674	0.000567391	0.00590882
DS10_00003950	2376.37	0.601033	0.174437	3.44557	0.000569865	0.00592829
DS10_00000584	293.143	-0.894678	0.259737	-3.44455	0.000572014	0.00594434
DS10_00007143	817.274	0.704642	0.204624	3.4436	0.000574026	0.0059587
DS10_00009665	655.942	0.807863	0.234617	3.44332	0.000574611	0.0059587
DS10_00005321	72.1116	1.30496	0.379212	3.44124	0.000579044	0.00599834
DS10_00012764	417.706	0.786932	0.228864	3.43844	0.000585086	0.00605453
DS10_00003221	176.131	1.05582	0.307098	3.43807	0.000585887	0.00605643
DS10_00007070	7346.35	0.577133	0.167947	3.43639	0.000589512	0.00608748
DS10_00007067	1019.06	0.732256	0.213156	3.4353	0.000591895	0.00610567
DS10_00006227	9.43662	1.64672	0.479482	3.43436	0.000593951	0.00612044
DS10_00010321	981.905	-0.870228	0.253471	-3.43324	0.000596411	0.00613934
DS10_00010836	1379.99	0.530807	0.154771	3.42963	0.000604395	0.00621501
DS10_00005437	1636.2	-0.475266	0.138614	-3.4287	0.000606486	0.00622998
DS10_00007111	10375.7	0.707818	0.206528	3.42723	0.000609769	0.00625714
DS10_00010551	7.44637	1.64722	0.480876	3.42547	0.000613745	0.00629136
DS10_00003613	13934.6	-0.949497	0.277269	-3.42446	0.000616029	0.00630819
DS10_00007115	1818.21	-0.549926	0.160669	-3.42273	0.00061995	0.00634172
DS10_00011308	408.015	1.09507	0.320086	3.42118	0.000623497	0.00637136
DS10_00002920	187.269	-1.25824	0.367921	-3.41987	0.000626517	0.00639555
DS10_00013295	2606.14	-0.752501	0.220064	-3.41947	0.000627425	0.00639817
DS10_00007388	1511.55	-0.716407	0.209532	-3.41908	0.000628344	0.00640088
DS10_00004216	274.624	1.00462	0.293918	3.41803	0.000630752	0.00641876
DS10_00007955	236.238	0.655162	0.191696	3.41771	0.000631498	0.00641969
DS10_00008219	908.84	-0.644842	0.188719	-3.41694	0.000633296	0.00642717
DS10_00011377	372.849	-0.651729	0.190741	-3.41683	0.000633544	0.00642717
DS10_00000560	1007.72	-0.662789	0.194556	-3.40667	0.000657596	0.00665053
DS10_00006747	836.3	0.739456	0.217054	3.40678	0.00065733	0.00665053
DS10_00009876	32.6216	-1.29193	0.379189	-3.40709	0.000656593	0.00665053
DS10_00000056	508.705	-1.23097	0.361782	-3.40252	0.000667685	0.00673868
DS10_00000091	663.783	-0.626994	0.18427	-3.40259	0.000667512	0.00673868
DS10_00007100	819.658	1.05101	0.308927	3.40211	0.000668666	0.00674164
DS10_00007074	110.139	1.21602	0.357542	3.40106	0.000671263	0.00676087
DS10_00000803	176.509	-1.24132	0.36513	-3.39967	0.000674664	0.00678816
DS10_00008157	63.9541	1.11699	0.329017	3.39492	0.000686477	0.00689994
DS10_00001790	1008.98	-0.558335	0.164623	-3.3916	0.00069485	0.00697695
DS10_00002091	1853.04	0.857598	0.253069	3.38879	0.000702006	0.00703644
DS10_00005934	494.118	-0.700558	0.206733	-3.38871	0.00070221	0.00703644
DS10_00003252	447.471	-0.564581	0.166639	-3.38805	0.000703911	0.00704282
DS10_00013497	214.207	-0.722515	0.213263	-3.38791	0.000704282	0.00704282
DS10_00002448	2753.74	-0.803489	0.23727	-3.3864	0.000708165	0.00707444
DS10_00000271	626.774	0.48361	0.142848	3.38548	0.000710527	0.00709081
DS10_00004601	189.182	0.881693	0.260494	3.38469	0.000712576	0.00710403
DS10_00002796	939.107	-0.647924	0.19152	-3.38306	0.000716833	0.00713922
DS10_00003111	1151.98	-1.30814	0.386737	-3.3825	0.000718295	0.00713929
DS10_00006293	7.97525	1.6217	0.479427	3.38259	0.000718069	0.00713929
DS10_00003291	8.35812	-1.6085	0.475634	-3.38179	0.000720143	0.00714554
DS10_00005578	1424.06	-1.37312	0.406044	-3.3817	0.000720382	0.00714554
DS10_00006899	589.972	0.48988	0.144946	3.37974	0.00072555	0.00718954
DS10_00012798	35.7438	-1.63766	0.484803	-3.378	0.000730152	0.00722784
DS10_00012818	17726.8	-0.66084	0.196048	-3.3708	0.000749495	0.00741184
DS10_00010217	13747.8	-0.43941	0.13047	-3.3679	0.000757427	0.00748274
DS10_00012950	411.13	0.811525	0.241103	3.36589	0.000762972	0.00752993
DS10_00013327	166.756	-0.861583	0.256032	-3.36514	0.000765036	0.00754271
DS10_00001598	4555.22	-0.559318	0.166333	-3.36265	0.000771995	0.00760368
DS10_00010335	859.756	-1.46447	0.436183	-3.35747	0.000786601	0.00773978
DS10_00008349	1111.48	0.693046	0.206507	3.35604	0.000790658	0.00776411
DS10_00013398	971.223	0.796508	0.237321	3.35625	0.000790079	0.00776411
DS10_00011767	727.674	-0.443811	0.132291	-3.35482	0.00079418	0.0077909
DS10_00006340	532.203	0.507813	0.151408	3.35395	0.00079668	0.00779983
DS10_00007244	266.743	0.795074	0.237042	3.35415	0.000796093	0.00779983
DS10_00006540	147.96	1.20751	0.360106	3.35322	0.000798778	0.00781257
DS10_00007094	512.025	0.570248	0.170119	3.35205	0.000802169	0.00783793
DS10_00012797	23.0357	1.63412	0.487596	3.35137	0.000804117	0.00784914
DS10_00006328	5329.05	-0.618016	0.18447	-3.35023	0.000807437	0.0078708
DS10_00010737	6405.06	-0.86242	0.257434	-3.35006	0.000807941	0.0078708
DS10_00011337	360.663	0.755565	0.225746	3.34698	0.000816985	0.00795101
DS10_00000439	99.8883	1.04209	0.311398	3.34647	0.000818476	0.00795763
DS10_00001523	234.885	1.29767	0.38791	3.34529	0.000821978	0.00798376
DS10_00003910	1455.65	-0.862574	0.257876	-3.34492	0.000823074	0.0079865
DS10_00008010	3173.97	-0.736734	0.22044	-3.3421	0.000831459	0.00805989
DS10_00004811	1848.65	0.527821	0.157956	3.34157	0.00083306	0.00806449
DS10_00008102	1362.37	0.394241	0.117987	3.3414	0.000833578	0.00806449
DS10_00004523	2468.54	0.506308	0.151593	3.33992	0.000838011	0.0080994
DS10_00003230	1366.37	0.805335	0.241191	3.33899	0.000840847	0.00811881
DS10_00007822	475.254	-0.636442	0.190982	-3.33247	0.000860776	0.00830306
DS10_00004871	1198.09	0.830165	0.249198	3.33134	0.000864284	0.00832871
DS10_00010172	224.502	0.863305	0.259196	3.3307	0.000866286	0.00833981
DS10_00005740	74.1133	-1.2396	0.37223	-3.3302	0.000867845	0.00834662
DS10_00001270	580.525	0.488744	0.146781	3.32975	0.000869247	0.00835192
DS10_00010558	478.917	0.940333	0.282646	3.3269	0.000878188	0.00842958
DS10_00012482	184.158	-0.930059	0.279948	-3.32225	0.000892933	0.00856273
DS10_00010740	142.313	0.950501	0.286521	3.31739	0.000908639	0.00870483
DS10_00000527	613.823	0.571388	0.172288	3.31646	0.000911647	0.00872513
DS10_00003665	1372.34	-0.599535	0.180791	-3.31617	0.000912594	0.00872568
DS10_00001717	1424.95	1.06843	0.322273	3.31529	0.000915484	0.00874479
DS10_00008984	240.717	0.977473	0.294994	3.31354	0.000921233	0.00879115
DS10_00002881	11422	-0.67617	0.204109	-3.31279	0.000923692	0.00880604
DS10_00006879	591.956	1.05777	0.319374	3.31202	0.000926238	0.00882174
DS10_00000555	33224.9	-1.21714	0.367886	-3.30848	0.000938052	0.0089256
DS10_00007480	776.617	-1.61668	0.488799	-3.30746	0.000941458	0.00894932
DS10_00001577	32.5291	-1.61951	0.489811	-3.3064	0.000945016	0.00897445
DS10_00002984	972.891	-0.776915	0.235107	-3.30452	0.000951381	0.00902616
DS10_00005232	990.563	0.453195	0.137163	3.30407	0.000952917	0.0090289
DS10_00010700	469.399	-0.800728	0.242359	-3.3039	0.000953511	0.0090289
DS10_00012302	399.308	1.25847	0.381094	3.30225	0.000959119	0.00907325
DS10_00010079	2406.35	0.568144	0.172187	3.29958	0.000968288	0.00915116
DS10_00007551	542.381	0.704948	0.213699	3.29879	0.000971037	0.00916831
DS10_00010521	12037.9	0.535093	0.162331	3.2963	0.000979665	0.00924088
DS10_00012317	191.137	1.01729	0.308708	3.29532	0.000983111	0.00926447
DS10_00002429	407.859	-1.0268	0.311724	-3.29393	0.000987988	0.0092889
DS10_00005758	699.682	-0.629008	0.190985	-3.2935	0.00098949	0.0092889
DS10_00008375	807.911	0.531734	0.161447	3.29355	0.00098931	0.0092889
DS10_00012003	122.373	-0.745784	0.226426	-3.29372	0.000988709	0.0092889
DS10_00002136	412.557	1.08707	0.330171	3.29245	0.00099319	0.00931471
DS10_00013381	696.057	0.696726	0.211636	3.2921	0.000994419	0.00931734
DS10_00006829	213.041	-1.30681	0.397	-3.29172	0.000995769	0.00932108
DS10_00008824	44.6936	1.36664	0.415289	3.2908	0.000999013	0.00934254
DS10_00003207	116.996	-1.13988	0.346683	-3.28796	0.00100916	0.00942845
DS10_00011611	87.299	1.358	0.413156	3.2869	0.00101298	0.00945509
DS10_00012313	1753.9	0.663576	0.201948	3.28587	0.00101667	0.00948053
DS10_00000797	114.901	-0.896926	0.273041	-3.28495	0.00101999	0.00950247
DS10_00003397	237.313	-1.08852	0.331812	-3.28055	0.00103606	0.00963669
DS10_00011347	5731.07	-0.84173	0.256589	-3.28046	0.00103636	0.00963669
DS10_00001467	2427.53	0.471805	0.143988	3.2767	0.0010503	0.00975702
DS10_00002405	126.612	0.916455	0.279832	3.27502	0.00105654	0.00980576
DS10_00012936	1073.65	-0.568272	0.173569	-3.27405	0.00106019	0.00983032
DS10_00012852	5684.08	-0.773876	0.23679	-3.26819	0.00108238	0.0100266
DS10_00002769	473.031	-0.914764	0.280307	-3.26344	0.00110068	0.0101865
DS10_00011474	316.852	-0.66854	0.204992	-3.26129	0.00110906	0.0102544
DS10_00012356	235.298	-0.801853	0.245978	-3.25985	0.00111469	0.0102968
DS10_00002819	1193.65	-0.81594	0.250774	-3.25369	0.00113915	0.0105127
DS10_00003206	620.294	0.947644	0.291381	3.25225	0.00114494	0.0105562
DS10_00005274	24.3521	1.40406	0.431843	3.25132	0.00114872	0.0105812
DS10_00012110	723.699	-0.915751	0.281912	-3.24835	0.00116075	0.010682
DS10_00006642	1373.87	-0.711918	0.219191	-3.24794	0.00116246	0.0106876
DS10_00001615	2599.43	-0.564815	0.174063	-3.24488	0.00117499	0.0107826
DS10_00004906	332.968	-0.724158	0.22316	-3.24502	0.00117443	0.0107826
DS10_00011702	1805.92	-1.13042	0.34859	-3.24282	0.00118351	0.0108507
DS10_00007798	30.2842	1.35191	0.417204	3.24042	0.00119355	0.0109325
DS10_00000268	3419.29	-0.579232	0.17879	-3.23974	0.0011964	0.0109484
DS10_00000546	1386.57	0.845029	0.260899	3.23892	0.00119985	0.0109595
DS10_00006592	403.537	0.628122	0.193916	3.23915	0.00119887	0.0109595
DS10_00006767	302.792	0.983199	0.303593	3.23854	0.00120141	0.0109636
DS10_00000198	1239.97	0.534398	0.16522	3.23447	0.0012187	0.0111111
DS10_00002770	400.129	-0.549371	0.169959	-3.23237	0.00122768	0.0111824
DS10_00013213	6.73878	1.5398	0.476797	3.22946	0.00124025	0.0112865
DS10_00000930	982.368	0.515256	0.159757	3.22525	0.00125863	0.0114431
DS10_00010874	51.7393	-1.20937	0.375091	-3.22421	0.00126319	0.011474
DS10_00006880	4416.84	-0.787021	0.244234	-3.22241	0.00127117	0.0115357
DS10_00000871	1187.89	0.923504	0.286658	3.22162	0.00127466	0.0115568
DS10_00008812	2501.55	0.481947	0.149631	3.22089	0.00127793	0.0115757
DS10_00007720	81.6744	1.21236	0.376456	3.22046	0.00127984	0.0115823
DS10_00009164	1412.24	0.496751	0.154299	3.2194	0.0012846	0.0116147
DS10_00004140	5198.34	-0.429824	0.133573	-3.21789	0.00129136	0.0116651
DS10_00002001	152.302	0.736266	0.22885	3.21725	0.00129427	0.0116806
DS10_00007932	5649.1	0.50324	0.156438	3.21686	0.00129602	0.0116856
DS10_00011462	1889.15	-0.698427	0.217555	-3.21036	0.00132571	0.0119424
DS10_00001016	612.967	-0.811529	0.252926	-3.20856	0.001334	0.0119852
DS10_00010918	34.5546	-1.53705	0.479021	-3.20873	0.00133323	0.0119852
DS10_00012303	901.266	-0.895043	0.278957	-3.20853	0.00133413	0.0119852
DS10_00000367	1377.23	-0.637619	0.19879	-3.2075	0.00133893	0.0120063
DS10_00012704	165.666	0.665463	0.207469	3.20752	0.00133883	0.0120063
DS10_00004800	1235.86	-0.51433	0.160457	-3.2054	0.00134876	0.0120834
DS10_00005821	570.372	-0.594824	0.185645	-3.20409	0.00135488	0.0121272
DS10_00003520	308.17	-1.14391	0.357075	-3.20355	0.00135746	0.0121392
DS10_00002531	7302.81	-0.772655	0.241258	-3.20261	0.0013619	0.0121678
DS10_00003712	1745.24	0.63069	0.197038	3.20086	0.0013702	0.0122249
DS10_00007381	158.905	-0.970301	0.30315	-3.20073	0.00137078	0.0122249
DS10_00005704	2617.63	-0.870139	0.272194	-3.19677	0.00138977	0.012383
DS10_00006401	231.782	-0.705813	0.220853	-3.19585	0.00139421	0.0124113
DS10_00012185	14317.7	-0.868996	0.272083	-3.19387	0.0014038	0.0124853
DS10_00006320	539.181	-0.814186	0.254991	-3.193	0.00140803	0.0125116
DS10_00001814	247.096	-0.869803	0.272542	-3.19145	0.00141561	0.0125675
DS10_00005113	569.609	-0.557756	0.174919	-3.18866	0.00142934	0.0126779
DS10_00004566	1022.13	0.521865	0.163762	3.18672	0.00143895	0.0127517
DS10_00009791	435.757	0.974471	0.305842	3.18619	0.00144161	0.0127637
DS10_00001530	152.957	-0.813465	0.255374	-3.18538	0.00144564	0.0127811
DS10_00006539	1718.92	1.07215	0.336596	3.18527	0.00144618	0.0127811
DS10_00004948	485.44	0.983311	0.309363	3.1785	0.00148041	0.0130718
DS10_00000079	166.391	-0.95705	0.301272	-3.1767	0.00148961	0.0131412
DS10_00002159	1128.35	-0.54183	0.170631	-3.17545	0.00149605	0.0131862
DS10_00013267	2049.01	0.896634	0.28243	3.17471	0.00149985	0.0132078
DS10_00005150	4294.7	0.628418	0.198041	3.17317	0.00150787	0.0132607
DS10_00005876	1975.53	0.534801	0.168546	3.17303	0.00150856	0.0132607
DS10_00002959	197.517	-0.94329	0.297364	-3.17217	0.00151303	0.0132844
DS10_00003793	3058.4	-0.932127	0.293862	-3.17199	0.00151396	0.0132844
DS10_00006896	1283.71	-0.990858	0.313036	-3.16532	0.00154913	0.0135809
DS10_00007336	282.51	-0.627682	0.198374	-3.16414	0.00155542	0.0136116
DS10_00008343	284.188	-0.978655	0.30929	-3.1642	0.00155511	0.0136116
DS10_00004624	1854.38	-0.535896	0.16941	-3.1633	0.00155989	0.0136386
DS10_00001139	604.257	0.903504	0.285839	3.16088	0.00157291	0.0137402
DS10_00004872	37.617	-1.32167	0.418599	-3.15736	0.00159207	0.0138855
DS10_00013011	474.56	0.727624	0.230458	3.1573	0.00159237	0.0138855
DS10_00001362	1554.8	0.563548	0.178514	3.15687	0.00159471	0.0138935
DS10_00004152	365.374	0.819038	0.260534	3.14369	0.00166833	0.014522
DS10_00008536	259.474	0.737808	0.234964	3.14009	0.00168894	0.0146884
DS10_00008281	298.208	0.724198	0.230714	3.13894	0.00169561	0.0147334
DS10_00000743	162.373	0.860058	0.274181	3.13683	0.00170785	0.0148202
DS10_00001317	2880.45	0.691689	0.220515	3.1367	0.00170862	0.0148202
DS10_00011771	98.9327	1.38478	0.441692	3.13518	0.0017175	0.014884
DS10_00007126	180.367	0.937704	0.299276	3.13324	0.00172888	0.0149694
DS10_00000048	1659.94	-0.737269	0.235412	-3.13182	0.00173725	0.0150286
DS10_00013098	7.59043	-1.46863	0.468975	-3.13156	0.0017388	0.0150287
DS10_00004972	1032.57	-0.481061	0.153834	-3.12714	0.00176516	0.0152298
DS10_00012790	1836.11	0.524887	0.16784	3.12731	0.00176416	0.0152298
DS10_00010257	506.752	-0.486759	0.155787	-3.12453	0.00178092	0.0153522
DS10_00006370	465.767	0.882142	0.282464	3.12302	0.00179003	0.0154037
DS10_00011381	693.941	-0.642216	0.205633	-3.12312	0.00178946	0.0154037
DS10_00012117	409.377	0.999175	0.320018	3.12225	0.00179476	0.0154309
DS10_00001429	35.5022	-1.32322	0.423994	-3.12084	0.00180339	0.0154914
DS10_00001149	1083.38	0.626943	0.201009	3.11898	0.00181481	0.0155759
DS10_00000599	20676	0.673014	0.216027	3.11541	0.00183688	0.0157516
DS10_00002874	289.667	-0.757157	0.243067	-3.11501	0.0018394	0.0157594
DS10_00009461	215.747	1.21146	0.388951	3.11468	0.00184143	0.0157631
DS10_00008513	48219	-0.453514	0.145689	-3.1129	0.00185258	0.0158447
DS10_00000264	21.2849	-1.52457	0.490078	-3.11088	0.00186534	0.0159399
DS10_00011700	497.261	-0.728085	0.234112	-3.10999	0.00187093	0.0159599
DS10_00013483	479.559	-0.646217	0.207781	-3.11009	0.00187033	0.0159599
DS10_00001604	408.259	-0.635209	0.204315	-3.10897	0.0018774	0.0159872
DS10_00009897	337.079	-0.846612	0.272297	-3.10914	0.0018763	0.0159872
DS10_00010137	1917.34	-0.399596	0.128587	-3.10758	0.00188625	0.0160486
DS10_00002148	12015.7	-0.459814	0.148023	-3.10638	0.00189393	0.0161001
DS10_00005760	20350.3	-0.573448	0.184635	-3.10585	0.00189734	0.016115
DS10_00011772	10169.1	-0.600148	0.193327	-3.10431	0.00190723	0.016185
DS10_00004608	469.671	0.597545	0.192523	3.10376	0.00191079	0.0162012
DS10_00012085	131.315	-0.821252	0.264796	-3.10145	0.00192574	0.0163139
DS10_00000447	4316.5	0.580123	0.187077	3.10099	0.00192876	0.0163164
DS10_00000632	3864.92	-0.56958	0.183682	-3.1009	0.00192936	0.0163164
DS10_00010391	44830.3	-0.695824	0.224449	-3.10014	0.00193431	0.0163442
DS10_00003927	219.235	0.930942	0.300436	3.09863	0.00194415	0.0164015
DS10_00007089	59.9583	1.13009	0.364711	3.09859	0.00194444	0.0164015
DS10_00000648	563.57	0.987488	0.318824	3.09729	0.00195301	0.0164596
DS10_00012418	209.197	-0.754768	0.243904	-3.09453	0.00197127	0.0165993
DS10_00004574	33.5748	-1.35782	0.439147	-3.09196	0.00198842	0.0167293
DS10_00002909	206.631	-0.637676	0.20626	-3.09162	0.0019907	0.0167342
DS10_00003098	1310.03	-0.578614	0.187188	-3.09108	0.00199428	0.0167499
DS10_00010770	7157.66	-0.830825	0.268883	-3.08991	0.00200214	0.0167872
DS10_00012583	161.484	-0.973312	0.314987	-3.09001	0.00200152	0.0167872
DS10_00007328	11380.2	-0.474737	0.153728	-3.08816	0.002014	0.0168722
DS10_00003144	624.97	0.491441	0.159316	3.0847	0.00203757	0.0170412
DS10_00008783	2419.3	0.875562	0.283841	3.08469	0.00203765	0.0170412
DS10_00010574	4865.78	-0.688544	0.223314	-3.08331	0.00204714	0.017106
DS10_00002089	2004.59	0.509253	0.165195	3.08274	0.00205102	0.0171238
DS10_00004260	15076.4	-0.769023	0.249876	-3.07761	0.00208666	0.0174066
DS10_00002924	1438.66	0.590259	0.191869	3.07637	0.0020954	0.0174646
DS10_00011706	799.866	0.829447	0.269726	3.07514	0.00210402	0.0175216
DS10_00001469	450.998	1.03503	0.336626	3.07471	0.0021071	0.0175281
DS10_00011537	297.79	0.798523	0.259722	3.07453	0.00210837	0.0175281
DS10_00007443	5611.94	-0.792376	0.257753	-3.07417	0.00211089	0.0175342
DS10_00003465	2811.02	-0.679513	0.221119	-3.07306	0.00211875	0.0175845
DS10_00006544	81.5626	1.46351	0.476538	3.07113	0.00213251	0.0176838
DS10_00004010	1856.32	-1.16918	0.380904	-3.06949	0.00214427	0.0177663
DS10_00004338	638.926	-1.00088	0.326116	-3.06909	0.00214715	0.0177752
DS10_00010656	1542.32	0.699008	0.227892	3.06728	0.00216014	0.0178676
DS10_00003361	5972.44	0.942552	0.307419	3.06601	0.00216934	0.0179135
DS10_00009542	629.985	0.676026	0.220474	3.06625	0.00216765	0.0179135
DS10_00011258	491.915	0.505074	0.16475	3.06569	0.00217166	0.0179176
DS10_00007125	192.52	0.981923	0.320381	3.06486	0.00217771	0.0179524
DS10_00009608	1779.88	-0.413006	0.134787	-3.06414	0.00218293	0.0179734
DS10_00009981	17201.5	-0.487317	0.159045	-3.06401	0.00218392	0.0179734
DS10_00010121	921.904	0.814344	0.265877	3.06285	0.00219237	0.0180278
DS10_00005687	652.447	-0.669033	0.21854	-3.06137	0.00220328	0.0181023
DS10_00012281	1629.54	-1.18964	0.3887	-3.06057	0.00220915	0.0181354
DS10_00002346	1643.3	-0.726269	0.237361	-3.05976	0.00221514	0.0181541
DS10_00008401	5159.3	0.426146	0.139268	3.0599	0.00221408	0.0181541
DS10_00003052	179.522	-0.69736	0.227933	-3.0595	0.00221709	0.018155
DS10_00004417	254.459	-0.747464	0.244464	-3.05756	0.00223146	0.0182574
DS10_00006345	318.194	-0.834106	0.272849	-3.05702	0.0022355	0.01826
DS10_00013303	770.089	-1.26205	0.412835	-3.05704	0.00223535	0.01826
DS10_00002122	114.504	-1.0714	0.350531	-3.0565	0.00223936	0.0182763
DS10_00005172	2553.52	0.376991	0.123398	3.05509	0.00224992	0.018332
DS10_00009391	989.561	0.973912	0.318778	3.05514	0.00224956	0.018332
DS10_00010682	1692.55	0.720011	0.235743	3.05422	0.00225647	0.0183701
DS10_00007120	614.651	1.14296	0.37434	3.05327	0.00226361	0.0184129
DS10_00006359	1724.77	0.797377	0.261215	3.05257	0.00226892	0.0184408
DS10_00010180	2026.01	0.442512	0.145138	3.0489	0.00229681	0.0186521
DS10_00005620	2500.19	-0.5878	0.193024	-3.04521	0.00232515	0.0188666
DS10_00011769	620.11	0.824787	0.270977	3.04376	0.00233645	0.0189426
DS10_00001730	6.04324	-1.42179	0.467213	-3.04314	0.00234123	0.0189657
DS10_00010872	787.699	-0.817106	0.268535	-3.04283	0.00234368	0.0189699
DS10_00013464	56.9133	1.23286	0.405315	3.04173	0.00235225	0.0190236
DS10_00008921	109.526	-0.814205	0.267738	-3.04105	0.00235758	0.0190509
DS10_00005548	151.41	-1.42581	0.468973	-3.04029	0.00236348	0.0190829
DS10_00007349	593.154	0.490437	0.161502	3.03673	0.00239159	0.019294
DS10_00005115	2044.17	-0.414942	0.136682	-3.03582	0.00239886	0.0193234
DS10_00013312	407.428	-1.03578	0.341192	-3.03578	0.00239918	0.0193234
DS10_00009191	86.3067	1.10295	0.36336	3.03542	0.00240203	0.0193306
DS10_00004355	720.331	-0.492514	0.162271	-3.03513	0.00240432	0.0193331
DS10_00005488	9987.6	-0.640385	0.211158	-3.03272	0.00242357	0.0194719
DS10_00005298	432.175	1.18247	0.38994	3.03244	0.00242587	0.0194745
DS10_00000380	1356.91	-0.608902	0.200815	-3.03215	0.00242821	0.0194773
DS10_00000407	3333.18	-0.805348	0.265658	-3.03153	0.00243321	0.0194957
DS10_00002217	441.46	-0.511844	0.168849	-3.03137	0.00243448	0.0194957
DS10_00003729	3916.3	-0.590847	0.195018	-3.0297	0.00244795	0.0195239
DS10_00003847	4507.28	-0.633029	0.208891	-3.03043	0.00244205	0.0195239
DS10_00008526	742.652	-0.631791	0.208509	-3.03004	0.00244525	0.0195239
DS10_00008569	158.578	-0.927769	0.306157	-3.03037	0.00244257	0.0195239
DS10_00010570	713.861	0.509526	0.168165	3.02991	0.00244623	0.0195239
DS10_00003575	8.49414	1.41997	0.468832	3.02874	0.00245573	0.0195658
DS10_00011545	258.741	0.853011	0.281655	3.02856	0.0024572	0.0195658
DS10_00011393	140.022	1.31162	0.433241	3.02746	0.00246618	0.0196214
DS10_00009087	599.4	0.46815	0.154682	3.02653	0.00247374	0.0196497
DS10_00012655	132.65	-1.16096	0.383589	-3.02656	0.0024735	0.0196497
DS10_00007064	7440.47	0.446382	0.147617	3.02393	0.00249515	0.0198038
DS10_00003586	4044.45	-0.600522	0.198665	-3.02278	0.00250461	0.0198467
DS10_00011453	693.39	1.12376	0.371753	3.02287	0.00250388	0.0198467
DS10_00002492	2030.49	0.542708	0.17956	3.02243	0.00250754	0.0198539
DS10_00002498	4331.1	-0.718587	0.237895	-3.0206	0.00252274	0.0199129
DS10_00002863	345.008	-0.847787	0.280606	-3.02127	0.00251715	0.0199129
DS10_00005729	1617.63	-0.898529	0.297471	-3.02056	0.00252311	0.0199129
DS10_00010976	986.38	0.706589	0.233889	3.02104	0.00251909	0.0199129
DS10_00003608	1110.64	0.743691	0.246243	3.02015	0.00252653	0.0199194
DS10_00010704	398.305	-0.49561	0.164111	-3.01997	0.002528	0.0199194
DS10_00011714	1091.96	-1.20975	0.400838	-3.01804	0.00254412	0.0200303
DS10_00002278	330.919	-0.63921	0.211923	-3.01624	0.00255929	0.0201336
DS10_00004788	125.246	-0.737702	0.244605	-3.01589	0.00256225	0.0201408
DS10_00001772	5744.14	-0.778596	0.258286	-3.01448	0.00257424	0.0202188
DS10_00000071	154.251	1.10632	0.367074	3.01389	0.00257924	0.0202257
DS10_00000364	519.077	-0.730124	0.24225	-3.01393	0.00257891	0.0202257
DS10_00010496	2090.37	0.608639	0.202066	3.01209	0.0025946	0.0203299
DS10_00013273	237.087	0.867706	0.288171	3.01108	0.00260319	0.0203809
DS10_00001489	174.009	0.840872	0.279302	3.01062	0.00260716	0.0203957
DS10_00012786	152.423	-0.945952	0.314235	-3.01034	0.0026096	0.0203985
DS10_00003629	378.607	0.964998	0.320601	3.00996	0.00261281	0.0204073
DS10_00012836	710.658	-0.739653	0.245762	-3.00963	0.00261564	0.0204132
DS10_00003274	32.1575	1.14627	0.380915	3.00925	0.0026189	0.0204224
DS10_00003155	804.528	-0.640914	0.213124	-3.00724	0.00263634	0.0205421
DS10_00013041	4351.45	-0.791793	0.263411	-3.00592	0.00264777	0.0206148
DS10_00005420	91.4342	-1.04896	0.349039	-3.00529	0.00265328	0.0206413
DS10_00011051	99.2768	-1.21647	0.404912	-3.0043	0.00266196	0.0206924
DS10_00001800	5745.67	-0.700003	0.23305	-3.00366	0.00266756	0.0207196
DS10_00004024	615.136	0.608576	0.202701	3.00234	0.00267917	0.0207932
DS10_00013222	264.565	-0.59288	0.197528	-3.0015	0.00268654	0.020834
DS10_00009784	788.668	0.542082	0.180727	2.99946	0.00270462	0.0209576
DS10_00000467	1371.13	-0.952285	0.317559	-2.99876	0.00271078	0.0209888
DS10_00002945	3543.43	-0.823917	0.274775	-2.99851	0.002713	0.0209893
DS10_00011399	1962.42	0.635622	0.212016	2.99799	0.00271768	0.021009
DS10_00004700	614.977	0.676688	0.225826	2.9965	0.00273097	0.0210951
DS10_00002596	133.661	1.02406	0.341802	2.99607	0.00273486	0.0211086
DS10_00006891	92.2894	0.828709	0.276639	2.99563	0.0027388	0.0211224
DS10_00001057	3189.78	0.715452	0.2389	2.99478	0.00274644	0.0211314
DS10_00009567	2905.15	-0.582271	0.194403	-2.99517	0.00274289	0.0211314
DS10_00009782	396.457	0.570383	0.190451	2.99491	0.0027453	0.0211314
DS10_00009949	193.346	-0.872844	0.291485	-2.99447	0.00274924	0.0211364
DS10_00004746	875.653	-0.442707	0.147861	-2.99407	0.00275279	0.0211471
DS10_00003138	195.192	-0.697222	0.233075	-2.99141	0.00277696	0.0213161
DS10_00003689	2133.14	-0.673199	0.225069	-2.99108	0.00277991	0.021322
DS10_00000790	642.391	-0.453166	0.151697	-2.98731	0.00281441	0.0215698
DS10_00006778	534.47	-0.6908	0.23134	-2.98608	0.00282577	0.0216094
DS10_00007439	2966.41	0.333114	0.111557	2.98604	0.00282618	0.0216094
DS10_00012951	7524.77	-0.636119	0.213002	-2.98645	0.00282236	0.0216094
DS10_00012666	843.366	0.448244	0.150156	2.98519	0.00283406	0.0216527
DS10_00000057	85.4075	-1.44642	0.484669	-2.98435	0.00284184	0.0216884
DS10_00006249	3685.44	0.743285	0.249073	2.98421	0.00284315	0.0216884
DS10_00006312	727.918	0.894901	0.299978	2.98322	0.0028523	0.0217413
DS10_00001815	2208.13	-0.706237	0.236756	-2.98297	0.00285463	0.0217422
DS10_00010532	288.572	-0.719504	0.24131	-2.98165	0.00286698	0.0218193
DS10_00001305	203.852	0.737375	0.247636	2.97765	0.00290467	0.022089
DS10_00001599	1566.09	0.568379	0.191059	2.9749	0.00293088	0.022271
DS10_00002243	170.214	0.787197	0.264683	2.97411	0.00293838	0.0223108
DS10_00004298	3115.49	0.67308	0.226544	2.97109	0.00296749	0.0225144
DS10_00001636	6893.44	-0.673128	0.226742	-2.9687	0.00299067	0.0226727
DS10_00001701	237.344	0.727475	0.24511	2.96795	0.00299792	0.0226926
DS10_00011932	565.854	0.548161	0.18469	2.96801	0.00299735	0.0226926
DS10_00008283	803.688	-0.428121	0.144336	-2.96614	0.00301567	0.0228093
DS10_00001021	78.5666	1.44923	0.488814	2.96479	0.00302887	0.0228915
DS10_00007917	31.4746	1.40405	0.473615	2.96455	0.00303128	0.0228921
DS10_00001134	385.361	0.688723	0.232413	2.96336	0.00304296	0.0229627
DS10_00004668	6215.96	0.67557	0.228023	2.96273	0.00304927	0.0229925
DS10_00004985	495.385	-0.851018	0.287268	-2.96245	0.00305197	0.0229953
DS10_00010572	113.722	-1.20003	0.405163	-2.96186	0.00305788	0.0230221
DS10_00011061	237.779	-0.981243	0.331437	-2.96057	0.00307073	0.0230834
DS10_00011832	2992.46	-0.728079	0.245908	-2.96078	0.00306859	0.0230834
DS10_00005873	284.461	0.699592	0.236604	2.95681	0.00310843	0.023349
DS10_00010074	348.491	-0.676883	0.22895	-2.95646	0.00311191	0.0233572
DS10_00003257	7761.37	-0.523671	0.177228	-2.95479	0.00312885	0.0234485
DS10_00012456	148.909	1.16857	0.395481	2.95481	0.00312859	0.0234485
DS10_00009978	16991.3	-0.474345	0.160611	-2.95337	0.00314323	0.0235383
DS10_00004907	515.004	-0.987033	0.334333	-2.95225	0.00315472	0.0235882
DS10_00011251	350.3	0.883755	0.299329	2.95245	0.00315262	0.0235882
DS10_00012196	552.328	0.666168	0.225885	2.94915	0.00318647	0.0238075
DS10_00004854	66.8927	1.29848	0.44052	2.9476	0.00320252	0.0239092
DS10_00000155	99.2764	-1.19338	0.404966	-2.94686	0.00321014	0.0239479
DS10_00006731	1503.72	0.407745	0.138442	2.94525	0.00322691	0.0240547
DS10_00008277	305.452	0.724401	0.246002	2.94469	0.00323276	0.0240618
DS10_00012485	249.805	0.645468	0.219191	2.94478	0.00323189	0.0240618
DS10_00002921	87.1977	-0.894519	0.303845	-2.944	0.00324002	0.0240792
DS10_00011721	11350.4	-0.597356	0.202894	-2.94418	0.00323816	0.0240792
DS10_00003003	249.871	0.632226	0.214904	2.9419	0.00326208	0.0242248
DS10_00002520	202.888	0.62063	0.21103	2.94096	0.00327193	0.0242613
DS10_00003640	674.417	-0.607163	0.206434	-2.94119	0.00326953	0.0242613
DS10_00008124	1367.16	-0.574189	0.195427	-2.93813	0.00330198	0.0244656
DS10_00002940	237.994	0.917384	0.312561	2.93505	0.00333489	0.0246907
DS10_00000116	452.343	0.960589	0.327495	2.93314	0.00335551	0.0248247
DS10_00010438	8.05401	1.36592	0.465812	2.93235	0.00336413	0.0248697
DS10_00003633	31.8043	1.4411	0.491501	2.93205	0.00336738	0.024875
DS10_00010759	513.456	-0.579733	0.197806	-2.93081	0.00338081	0.0249554
DS10_00009868	4334.47	0.62278	0.212591	2.92947	0.00339537	0.025044
DS10_00001495	3153.42	0.566033	0.19324	2.92917	0.00339868	0.0250496
DS10_00009758	237.101	-1.21252	0.414006	-2.92874	0.00340335	0.0250652
DS10_00004843	71.867	1.16395	0.397814	2.92585	0.00343515	0.0252804
DS10_00010301	466.404	-0.659845	0.225592	-2.92495	0.00344512	0.0253348
DS10_00000882	2766.49	0.360915	0.123461	2.92332	0.00346322	0.0254489
DS10_00003293	891.594	0.411992	0.140964	2.92267	0.0034704	0.0254634
DS10_00011544	104.757	-0.816671	0.279405	-2.92289	0.00346798	0.0254634
DS10_00001082	1935.69	-0.513059	0.175609	-2.92159	0.00348247	0.0255138
DS10_00002557	2199.29	0.946486	0.32396	2.92161	0.00348223	0.0255138
DS10_00011115	209.005	-0.759508	0.260318	-2.91761	0.00352722	0.0258224
DS10_00007136	1209.16	0.80985	0.277703	2.91625	0.00354264	0.025916
DS10_00007598	957.618	-0.97789	0.335477	-2.91492	0.00355781	0.0260076
DS10_00013052	348.041	1.03596	0.355438	2.91461	0.00356133	0.0260139
DS10_00004217	3375.75	-0.565884	0.194276	-2.91279	0.00358218	0.0261273
DS10_00011842	657.757	-0.608507	0.208904	-2.91286	0.00358138	0.0261273
DS10_00012275	426.889	1.02423	0.351664	2.91252	0.00358521	0.02613
DS10_00003220	1550.96	0.549122	0.188642	2.91092	0.00360369	0.0262428
DS10_00006669	758.457	-0.579397	0.199057	-2.91071	0.00360604	0.0262428
DS10_00005377	22809.6	0.599647	0.20618	2.90837	0.00363324	0.0264211
DS10_00011209	5.94602	1.3577	0.467311	2.90534	0.00366859	0.0266584
DS10_00006523	253.971	0.587427	0.202206	2.90509	0.00367147	0.0266596
DS10_00013237	609.381	-0.552596	0.190251	-2.90457	0.00367755	0.026684
DS10_00002332	2114.34	0.571519	0.196827	2.90366	0.00368826	0.0267222
DS10_00004221	10038.7	0.708211	0.243899	2.9037	0.00368777	0.0267222
DS10_00012340	636.544	-0.998051	0.343879	-2.90233	0.003704	0.0268164
DS10_00001035	292.968	0.564994	0.194794	2.90047	0.00372602	0.0269559
DS10_00002115	1176.72	0.580312	0.200146	2.89944	0.00373824	0.0270244
DS10_00005697	1996.65	-0.893981	0.308447	-2.89833	0.00375153	0.0271005
DS10_00005650	431.394	1.03005	0.355475	2.89766	0.00375961	0.0271265
DS10_00009383	55.1365	1.15061	0.397094	2.89757	0.00376066	0.0271265
DS10_00002224	3413.35	0.718346	0.247978	2.89681	0.00376978	0.0271723
DS10_00004462	51.7713	-1.13952	0.393425	-2.8964	0.00377469	0.0271877
DS10_00001178	91.4119	0.783733	0.270677	2.89545	0.0037861	0.0272354
DS10_00007479	375.294	-0.502367	0.173506	-2.89539	0.00378686	0.0272354
DS10_00001079	678.497	-0.676328	0.233644	-2.8947	0.00379523	0.0272651
DS10_00006323	615.323	0.609814	0.210674	2.89459	0.00379655	0.0272651
DS10_00013122	220.138	-0.600453	0.207495	-2.89383	0.0038058	0.0273116
DS10_00008946	211.099	-0.761266	0.263124	-2.89319	0.00381356	0.0273473
DS10_00011788	645.925	0.763004	0.263894	2.89133	0.00383615	0.0274891
DS10_00009223	613.301	0.796926	0.275664	2.89093	0.003841	0.0275038
DS10_00001357	1450.32	0.800449	0.276993	2.88978	0.00385508	0.0275064
DS10_00007434	92.9581	-1.17005	0.404885	-2.88984	0.00385443	0.0275064
DS10_00008071	1567.3	0.556412	0.192516	2.89022	0.00384974	0.0275064
DS10_00009110	1180.7	0.857903	0.296877	2.88976	0.00385538	0.0275064
DS10_00010005	876.464	0.676604	0.234127	2.8899	0.00385366	0.0275064
DS10_00006333	578.985	0.428381	0.148319	2.88824	0.00387403	0.0276194
DS10_00003920	259.685	-0.731647	0.253801	-2.88276	0.00394203	0.0280837
DS10_00000714	10.79	-1.32178	0.458738	-2.88135	0.0039598	0.0281694
DS10_00002824	2929.01	-0.898005	0.31165	-2.88145	0.00395844	0.0281694
DS10_00006146	582.393	0.495457	0.172103	2.87884	0.00399141	0.0283737
DS10_00004667	7492.38	0.676849	0.235269	2.87691	0.00401586	0.0285268
DS10_00012384	451.048	-0.680298	0.236526	-2.87621	0.00402483	0.0285699
DS10_00004368	2572.33	0.664801	0.231497	2.87175	0.00408212	0.0289556
DS10_00005519	448.726	-0.522731	0.182083	-2.87084	0.00409381	0.0290175
DS10_00002575	78.5978	-1.1612	0.404562	-2.87026	0.00410131	0.0290497
DS10_00001941	2413.39	0.624246	0.217511	2.86995	0.00410537	0.0290511
DS10_00001976	1475.79	-0.692937	0.241459	-2.86979	0.00410743	0.0290511
DS10_00011138	37.0205	-1.13156	0.394359	-2.86937	0.00411293	0.0290691
DS10_00001049	386.006	0.483878	0.168681	2.86859	0.00412304	0.0291195
DS10_00001247	219.76	-0.617247	0.215319	-2.86666	0.00414829	0.0292617
DS10_00007426	1571.33	-0.676565	0.236017	-2.86659	0.00414914	0.0292617
DS10_00005297	2569.18	1.0803	0.376944	2.86595	0.00415764	0.0293006
DS10_00003912	11.5265	1.40771	0.49147	2.86428	0.00417952	0.0294126
DS10_00004838	471.75	0.708391	0.247313	2.86435	0.00417869	0.0294126
DS10_00006646	2469.31	-0.499908	0.17457	-2.86365	0.00418792	0.0294505
DS10_00005728	4678.64	-0.716572	0.250551	-2.85999	0.00423659	0.0297588
DS10_00012575	151.837	0.734328	0.256768	2.85989	0.00423782	0.0297588
DS10_00009637	735.176	-0.71322	0.24949	-2.85871	0.00425362	0.0298484
DS10_00002936	177.467	-0.745722	0.261048	-2.85665	0.0042814	0.0299884
DS10_00004901	17401.2	-0.719974	0.252043	-2.85655	0.00428274	0.0299884
DS10_00009503	644.57	-0.87438	0.306077	-2.85674	0.00428022	0.0299884
DS10_00011896	750.04	0.566599	0.198405	2.85576	0.00429334	0.0300411
DS10_00008767	2566.96	0.463893	0.162518	2.85441	0.00431165	0.0301477
DS10_00005018	3154.15	0.61021	0.213861	2.8533	0.00432673	0.0301672
DS10_00007581	1311.04	-0.724536	0.25391	-2.85351	0.00432387	0.0301672
DS10_00009548	705.29	0.69023	0.241905	2.85331	0.00432663	0.0301672
DS10_00012474	153.375	-1.06356	0.372695	-2.85369	0.00432149	0.0301672
DS10_00007967	1419.72	-0.584042	0.204915	-2.85016	0.00436966	0.0304449
DS10_00000672	983.613	0.749324	0.263049	2.84861	0.00439112	0.0305726
DS10_00007365	184.834	0.915575	0.321458	2.8482	0.00439677	0.0305903
DS10_00011045	276.849	0.683877	0.240147	2.84775	0.00440299	0.0306119
DS10_00000735	509.162	0.794511	0.279125	2.84644	0.00442112	0.0307161
DS10_00008243	174.829	0.993012	0.348891	2.84619	0.00442453	0.0307181
DS10_00005889	2100.33	0.430183	0.151158	2.84591	0.00442847	0.0307237
DS10_00003883	240.862	0.601231	0.211358	2.84461	0.00444663	0.0308279
DS10_00000840	40.7454	-1.24314	0.437148	-2.84376	0.00445847	0.0308881
DS10_00003457	27.6955	-1.30927	0.460662	-2.84215	0.00448099	0.0310004
DS10_00003693	489.702	-0.476276	0.167565	-2.84233	0.00447845	0.0310004
DS10_00004618	1201.17	0.503356	0.177153	2.84135	0.00449223	0.0310343
DS10_00005412	273.307	0.616774	0.217069	2.84137	0.00449201	0.0310343
DS10_00000955	2193.19	0.738092	0.259854	2.84041	0.00450553	0.0311044
DS10_00002620	1032.52	-0.517976	0.182423	-2.83942	0.00451957	0.0311769
DS10_00011930	14.8661	1.33427	0.469943	2.83922	0.00452239	0.0311769
DS10_00005196	33.419	1.23577	0.435519	2.83747	0.00454726	0.0313263
DS10_00000982	677.361	0.651873	0.229808	2.83659	0.00455976	0.0313904
DS10_00008209	179.248	0.696531	0.24561	2.83592	0.00456933	0.0314342
DS10_00005871	4657.99	0.706584	0.249263	2.83469	0.00458703	0.0315338
DS10_00004085	4788.92	0.45696	0.161257	2.83373	0.00460075	0.031606
DS10_00005166	5194.16	0.473747	0.167203	2.83337	0.00460606	0.0316203
DS10_00000345	5663	0.602079	0.212539	2.83279	0.0046143	0.0316326
DS10_00010860	98.7849	-0.858828	0.303171	-2.83281	0.00461403	0.0316326
DS10_00001017	9351.2	-0.671982	0.237282	-2.832	0.00462576	0.0316786
DS10_00011030	665.14	0.851241	0.300592	2.83188	0.00462747	0.0316786
DS10_00008132	24.1092	1.3877	0.49019	2.83095	0.00464099	0.031749
DS10_00004549	951.968	-0.407369	0.143915	-2.83062	0.00464573	0.0317593
DS10_00007145	1015.79	0.961298	0.339717	2.8297	0.00465913	0.0318075
DS10_00008972	1644.92	0.436259	0.154172	2.82969	0.00465926	0.0318075
DS10_00008777	141.092	-0.743596	0.26301	-2.82725	0.0046949	0.0320285
DS10_00007942	11113.8	-1.38141	0.489202	-2.82381	0.00474571	0.0323526
DS10_00005810	1811.43	0.596629	0.211372	2.82265	0.00476282	0.0324186
DS10_00011049	1186.23	-0.643478	0.22798	-2.82252	0.0047648	0.0324186
DS10_00011191	782.47	-0.589985	0.20903	-2.82249	0.0047653	0.0324186
DS10_00000979	104.44	-0.775759	0.274958	-2.82137	0.00478186	0.0325087
DS10_00003156	1153.53	0.65575	0.232531	2.82005	0.00480159	0.0326202
DS10_00004576	328.266	-0.751176	0.266428	-2.81943	0.00481088	0.0326607
DS10_00011434	134.462	-0.683355	0.2425	-2.81795	0.00483309	0.0327888
DS10_00001503	815.56	0.405422	0.143914	2.8171	0.00484591	0.0328304
DS10_00010835	1128.51	-0.484336	0.171927	-2.81711	0.00484586	0.0328304
DS10_00001421	2620.06	0.565008	0.200596	2.81664	0.00485283	0.0328546
DS10_00000991	341.536	0.780674	0.277262	2.81565	0.00486786	0.0328656
DS10_00001088	553.204	0.4748	0.16859	2.81629	0.00485811	0.0328656
DS10_00005660	207.244	-0.58604	0.208127	-2.81578	0.00486584	0.0328656
DS10_00010276	703.681	-0.630958	0.224067	-2.81594	0.00486348	0.0328656
DS10_00008786	143.219	0.80075	0.284589	2.81371	0.00489739	0.0330422
DS10_00003106	275.302	0.847221	0.301191	2.8129	0.00490962	0.033102
DS10_00003334	7499.95	0.557139	0.198119	2.81214	0.00492134	0.0331582
DS10_00007139	2929.45	0.54782	0.195021	2.80903	0.00496911	0.0334571
DS10_00011025	1581.92	0.624878	0.222485	2.80863	0.00497521	0.0334752
DS10_00004209	644.167	1.01075	0.360008	2.80759	0.00499138	0.033515
DS10_00011006	331.683	0.484788	0.172652	2.80789	0.00498669	0.033515
DS10_00012735	567.277	-0.671555	0.239183	-2.8077	0.00498964	0.033515
DS10_00003038	17.4201	-1.3504	0.481221	-2.80619	0.00501305	0.0336375
DS10_00012073	13219	0.417926	0.148942	2.80596	0.00501668	0.0336388
DS10_00007245	436.955	-0.663326	0.236505	-2.8047	0.0050363	0.0337473
DS10_00001802	387.556	0.512498	0.182987	2.80074	0.00509855	0.0341412
DS10_00010690	132.319	0.937236	0.334874	2.79878	0.00512968	0.0343261
DS10_00009901	4814.45	0.395379	0.141487	2.79445	0.00519882	0.0347651
DS10_00012983	789.9	0.496884	0.177835	2.79407	0.00520488	0.0347819
DS10_00009342	1266.62	0.611643	0.219105	2.79156	0.0052455	0.0350295
DS10_00005600	1038.84	0.956133	0.342551	2.79121	0.00525107	0.0350429
DS10_00010162	5.43392	1.29345	0.4635	2.7906	0.00526097	0.0350851
DS10_00005133	406.004	1.10803	0.397096	2.79034	0.00526519	0.0350893
DS10_00008650	4230.16	-0.736077	0.263861	-2.78964	0.00527664	0.0351417
DS10_00007323	1091.94	0.761736	0.273103	2.7892	0.00528392	0.0351664
DS10_00001213	2482.02	0.662543	0.237574	2.78879	0.00529058	0.0351869
DS10_00004272	706.813	0.636369	0.228239	2.78817	0.00530062	0.0352059
DS10_00008802	72.6694	0.944091	0.3386	2.78822	0.00529992	0.0352059
DS10_00002923	23.4703	1.17113	0.42012	2.7876	0.00530994	0.0352069
DS10_00009270	609.804	-0.473631	0.169892	-2.78783	0.00530629	0.0352069
DS10_00010287	21.3868	-1.26	0.452016	-2.78751	0.00531155	0.0352069
DS10_00007174	2804.62	-0.341773	0.122687	-2.78572	0.0053409	0.0353776
DS10_00010114	3952.75	-0.693433	0.249385	-2.78057	0.00542639	0.0359196
DS10_00013071	1444	0.879809	0.316632	2.77865	0.00545851	0.0361079
DS10_00004557	1687.77	1.00775	0.362789	2.77778	0.0054732	0.0361807
DS10_00009268	606.502	-0.558454	0.201202	-2.77558	0.00551025	0.0364011
DS10_00004656	1663.55	0.849553	0.30616	2.77487	0.00552235	0.0364565
DS10_00004415	936.323	-0.520388	0.187586	-2.77414	0.00553484	0.0364662
DS10_00009171	378.114	-1.01784	0.36689	-2.77424	0.00553303	0.0364662
DS10_00010108	1652.84	0.88958	0.32067	2.77413	0.00553498	0.0364662
DS10_00006035	724.829	-0.606161	0.218678	-2.77193	0.00557243	0.0366883
DS10_00003376	1084.8	0.51066	0.184249	2.77157	0.0055787	0.036705
DS10_00005785	3414.77	-0.780413	0.281608	-2.77128	0.00558367	0.036713
DS10_00006769	845.338	-0.830678	0.299985	-2.76906	0.00562176	0.036914
DS10_00007808	201.38	-0.657846	0.237568	-2.76909	0.00562128	0.036914
DS10_00011392	124.711	0.947676	0.342382	2.76789	0.00564202	0.0370222
DS10_00004363	1494.51	-0.547301	0.197761	-2.76748	0.00564911	0.037044
DS10_00011390	2401.53	0.621016	0.224429	2.76709	0.00565591	0.0370638
DS10_00000796	325.101	0.558702	0.202087	2.76467	0.00569807	0.0373151
DS10_00000409	764.517	-0.688711	0.249163	-2.7641	0.00570797	0.037355
DS10_00003224	4131.13	-0.372611	0.134874	-2.76267	0.00573315	0.0374948
DS10_00000832	9.61666	1.35344	0.489969	2.7623	0.00573956	0.0375117
DS10_00008890	14.8172	1.26829	0.459784	2.75844	0.00580783	0.0379326
DS10_00010498	5.34332	1.27474	0.462245	2.75772	0.00582054	0.0379904
DS10_00001639	712.809	0.508647	0.184496	2.75696	0.0058342	0.0380542
DS10_00009007	1172	1.0202	0.370137	2.75626	0.00584656	0.0380842
DS10_00009941	2350.21	-0.512538	0.185949	-2.75634	0.0058453	0.0380842
DS10_00009830	453.572	-0.605209	0.21963	-2.75558	0.00585878	0.0381385
DS10_00011591	736.656	0.517243	0.187798	2.75425	0.00588275	0.0382691
DS10_00010811	176.468	-0.736808	0.267612	-2.75326	0.00590045	0.0383529
DS10_00011567	1864.59	0.488252	0.177347	2.7531	0.00590346	0.0383529
DS10_00004239	932.514	-0.603862	0.219439	-2.75184	0.00592613	0.0384748
DS10_00004201	482.393	-0.527056	0.19156	-2.75139	0.00593422	0.0385018
DS10_00000958	1552.71	0.5352	0.194645	2.74962	0.00596642	0.0386851
DS10_00004680	708.087	0.992822	0.361159	2.74899	0.00597793	0.0387341
DS10_00013036	921.249	0.460059	0.167531	2.74611	0.00603073	0.0390505
DS10_00000541	432.982	0.442947	0.161352	2.74522	0.00604705	0.0390811
DS10_00006611	1772.84	-0.516397	0.188088	-2.74551	0.00604176	0.0390811
DS10_00012096	1346.93	0.413277	0.150545	2.7452	0.00604741	0.0390811
DS10_00007994	2872.74	-0.332307	0.12107	-2.74474	0.00605581	0.0390838
DS10_00009894	71.1606	1.12751	0.410784	2.74477	0.00605535	0.0390838
DS10_00002113	397.666	-0.479298	0.174645	-2.74442	0.00606179	0.0390967
DS10_00003532	1085.88	0.390092	0.142202	2.74324	0.00608367	0.0392109
DS10_00009849	419.378	-0.983349	0.35849	-2.74303	0.00608748	0.0392109
DS10_00008183	276.171	0.47203	0.172106	2.74267	0.00609427	0.0392288
DS10_00004640	2838.07	0.612208	0.223484	2.73938	0.00615558	0.0394688
DS10_00005162	1134.2	-0.439541	0.160433	-2.73972	0.00614908	0.0394688
DS10_00005709	201.273	-1.0676	0.389756	-2.73916	0.00615969	0.0394688
DS10_00007491	2982.06	0.541268	0.197545	2.73998	0.00614432	0.0394688
DS10_00007686	448.432	-0.441777	0.161215	-2.7403	0.00613827	0.0394688
DS10_00010452	4888.41	0.396017	0.14454	2.73985	0.00614673	0.0394688
DS10_00010523	321.628	0.879654	0.321141	2.73916	0.00615971	0.0394688
DS10_00008033	336.708	1.03187	0.376807	2.73845	0.00617297	0.0395279
DS10_00000779	3785.12	0.444891	0.162489	2.73798	0.00618181	0.0395329
DS10_00005565	22.0006	-1.18198	0.431673	-2.73813	0.00617901	0.0395329
DS10_00000349	233.565	-0.639276	0.233517	-2.7376	0.00618891	0.0395526
DS10_00002685	1866.38	-0.418705	0.153033	-2.73605	0.00621822	0.0397125
DS10_00011814	708.042	1.08394	0.396199	2.73584	0.00622204	0.0397125
DS10_00010652	932.694	0.604395	0.221034	2.73439	0.00624953	0.0398621
DS10_00009576	57.6859	-0.979406	0.358297	-2.7335	0.00626643	0.0399439
DS10_00008414	164.891	1.08542	0.397113	2.73329	0.00627056	0.0399443
DS10_00012173	320.555	0.801154	0.293166	2.73277	0.00628045	0.0399813
DS10_00003366	1758.69	0.491184	0.179862	2.7309	0.00631624	0.0401831
DS10_00012248	140.215	0.739497	0.270864	2.73014	0.00633067	0.0402488
DS10_00007896	2567.03	0.553758	0.202856	2.7298	0.00633723	0.0402644
DS10_00002588	46.5665	1.31662	0.48253	2.72858	0.00636073	0.0403876
DS10_00006442	336.888	-0.972319	0.356402	-2.72815	0.00636909	0.0404145
DS10_00008496	483.901	0.62585	0.229498	2.72704	0.00639061	0.0405248
DS10_00000692	785.296	0.653567	0.239727	2.7263	0.00640496	0.0405659
DS10_00003289	806.702	0.480584	0.176279	2.72628	0.00640535	0.0405659
DS10_00001485	262.495	0.941399	0.345351	2.72592	0.00641223	0.0405832
DS10_00011956	119.709	0.643618	0.236267	2.72411	0.00644746	0.0407799
DS10_00011533	877.816	-0.528223	0.194055	-2.72203	0.00648829	0.0409852
DS10_00011958	160.947	1.32821	0.487934	2.7221	0.00648687	0.0409852
DS10_00011369	117.517	0.968324	0.355872	2.72099	0.00650861	0.0410872
DS10_00000708	641.868	-0.726384	0.267219	-2.71831	0.00656158	0.0413949
DS10_00008282	741.563	0.646732	0.237987	2.71751	0.00657753	0.0414689
DS10_00005731	623.183	-1.21975	0.448934	-2.71699	0.00658782	0.0414763
DS10_00006561	5.19188	1.25159	0.460685	2.71681	0.0065914	0.0414763
DS10_00010492	349.98	-0.569629	0.209655	-2.71699	0.00658792	0.0414763
DS10_00005601	2157.31	-0.982691	0.361822	-2.71595	0.00660854	0.0415576
DS10_00007450	227.149	1.03857	0.382578	2.71465	0.00663455	0.0416944
DS10_00011182	454.978	-1.05283	0.387891	-2.71424	0.00664281	0.0417196
DS10_00007107	3456.04	0.648329	0.238893	2.71389	0.00664983	0.0417369
DS10_00005009	1770.09	-0.646663	0.238363	-2.71293	0.00666904	0.041804
DS10_00005768	21.8587	-1.23985	0.457005	-2.71299	0.00666784	0.041804
DS10_00000346	283.109	-0.61007	0.225	-2.71142	0.0066996	0.0419687
DS10_00002330	5.3627	1.24734	0.460103	2.711	0.00670798	0.0419944
DS10_00006824	46.3184	1.13205	0.417661	2.71046	0.0067189	0.042036
DS10_00001582	1448.47	0.395314	0.145903	2.70944	0.0067397	0.0421393
DS10_00004362	647.166	-0.508445	0.187732	-2.70836	0.00676159	0.0422492
DS10_00000252	870.979	0.467388	0.172642	2.70726	0.00678403	0.0423624
DS10_00004077	951.159	0.481897	0.178054	2.70647	0.00680027	0.0424098
DS10_00005349	420.995	1.16399	0.430062	2.70657	0.00679822	0.0424098
DS10_00003700	1259.42	-0.39412	0.145657	-2.70581	0.00681383	0.0424674
DS10_00000914	347.116	0.635472	0.234908	2.70519	0.00682649	0.0425102
DS10_00007555	197.559	1.16435	0.430437	2.70505	0.00682937	0.0425102
DS10_00000240	559.502	-0.792733	0.293103	-2.70462	0.00683824	0.0425385
DS10_00008073	516.282	-0.58979	0.218099	-2.70423	0.00684625	0.0425613
DS10_00005999	727.474	0.732779	0.27117	2.70229	0.00688644	0.042784
DS10_00002764	47.0342	0.907047	0.335764	2.70144	0.00690396	0.0428386
DS10_00004108	499.633	-0.515281	0.190735	-2.70156	0.00690146	0.0428386
DS10_00001996	3287.78	-0.658157	0.243695	-2.70074	0.00691849	0.0429016
DS10_00012958	366.011	-0.627293	0.232345	-2.69983	0.00693749	0.0429922
DS10_00006079	92.9434	0.91643	0.339707	2.6977	0.00698196	0.0432405
DS10_00005894	1050.33	0.598485	0.221924	2.6968	0.0070009	0.0433305
DS10_00006174	1095.67	-0.550605	0.204198	-2.69643	0.0070087	0.0433514
DS10_00002789	1835.59	0.520551	0.19312	2.69548	0.00702871	0.0433961
DS10_00006226	697.67	0.384502	0.142648	2.69546	0.0070292	0.0433961
DS10_00007102	738.057	0.883332	0.32771	2.69547	0.00702903	0.0433961
DS10_00000496	4616.78	0.42562	0.158001	2.69378	0.00706478	0.0435884
DS10_00001630	629.923	-0.526923	0.195703	-2.69246	0.00709276	0.0437335
DS10_00008216	618.104	0.534088	0.198494	2.6907	0.00713013	0.0438949
DS10_00009386	313.506	0.765143	0.284378	2.69058	0.00713274	0.0438949
DS10_00011747	2479.54	-0.540714	0.20098	-2.69039	0.00713683	0.0438949
DS10_00011847	1301.7	-0.599223	0.22269	-2.69084	0.00712734	0.0438949
DS10_00010328	1585.6	0.464998	0.172881	2.68969	0.00715182	0.0439595
DS10_00003616	3107.69	0.411785	0.15313	2.68912	0.00716411	0.0440074
DS10_00007156	1009.44	-0.522733	0.194461	-2.68811	0.00718583	0.0441133
DS10_00005596	1331.54	0.628468	0.233832	2.68769	0.00719489	0.0441413
DS10_00005436	149.191	-0.718657	0.267444	-2.68712	0.007207	0.0441879
DS10_00011733	28.7054	-1.18554	0.441423	-2.68573	0.00723708	0.0443446
DS10_00001033	133.673	-0.877696	0.326826	-2.68551	0.00724188	0.0443463
DS10_00006636	273.602	0.519926	0.193748	2.68352	0.0072852	0.044556
DS10_00010598	1890.57	0.468321	0.174515	2.68356	0.00728432	0.044556
DS10_00001833	362.175	0.676945	0.252445	2.68156	0.00732803	0.04479
DS10_00013302	698.709	-0.996159	0.371897	-2.67859	0.00739338	0.0451613
DS10_00005399	303.389	0.855313	0.319835	2.67423	0.00749	0.045723
DS10_00004630	3020.48	1.08141	0.404579	2.67294	0.00751903	0.0458717
DS10_00003195	3422.27	0.549389	0.205763	2.67	0.00758507	0.0462458
DS10_00008416	406.29	0.413277	0.154814	2.66951	0.00759615	0.0462846
DS10_00005375	295.058	-0.545188	0.204403	-2.66722	0.00764806	0.046572
DS10_00001486	268.304	0.929794	0.348725	2.66626	0.00766996	0.0465948
DS10_00001688	648.665	0.762674	0.286027	2.66645	0.00766579	0.0465948
DS10_00005545	479.255	0.736394	0.276193	2.66623	0.0076708	0.0465948
DS10_00009350	587.849	-0.446667	0.167516	-2.66642	0.00766639	0.0465948
DS10_00007073	399.818	0.842986	0.316315	2.66502	0.00769845	0.0467338
DS10_00000150	84.991	-0.782132	0.293964	-2.66064	0.00779927	0.0472873
DS10_00004377	3207.24	0.32055	0.120472	2.66079	0.00779571	0.0472873
DS10_00002914	1345.52	-0.713295	0.268192	-2.65964	0.00782233	0.0473978
DS10_00008966	1473.97	-0.964931	0.36288	-2.65909	0.00783525	0.0474468
DS10_00011582	149.771	-0.632757	0.238042	-2.65818	0.00785642	0.0475456
DS10_00002075	632.837	0.402648	0.151515	2.65748	0.00787262	0.0476143
DS10_00005242	381.416	-0.709616	0.267068	-2.65706	0.0078825	0.0476447
DS10_00005013	468.586	-0.532891	0.200615	-2.65629	0.00790063	0.0477249
DS10_00012577	2579.3	-0.417363	0.157182	-2.65528	0.00792421	0.0478378
DS10_00004660	2153.99	-0.550144	0.207228	-2.65478	0.00793611	0.0478508
DS10_00006265	2960.34	0.633332	0.238547	2.65496	0.00793189	0.0478508
DS10_00008391	1005.07	0.358454	0.135042	2.6544	0.007945	0.0478749
DS10_00001907	171.767	1.07876	0.406493	2.65381	0.00795887	0.0478997
DS10_00008475	89.124	0.969558	0.365317	2.65401	0.00795404	0.0478997
DS10_00011010	7.48891	1.27631	0.481004	2.65344	0.00796762	0.047923
DS10_00007303	173.886	1.17608	0.443513	2.65174	0.00800784	0.0481354
DS10_00006780	853.985	-0.664277	0.250572	-2.65105	0.00802428	0.0481457
DS10_00008646	1042.05	-0.956507	0.360763	-2.65135	0.00801718	0.0481457
DS10_00008825	295.426	0.73857	0.278579	2.6512	0.00802061	0.0481457
DS10_00008457	3025.51	-0.435403	0.164253	-2.65082	0.00802974	0.048149
DS10_00010097	393.187	-0.476066	0.179649	-2.64998	0.00804974	0.0482394
DS10_00002919	35.2072	-1.04086	0.392917	-2.64906	0.00807149	0.0483402
DS10_00001326	633.175	0.654692	0.247346	2.64687	0.00812405	0.0486253
DS10_00011798	158.419	-0.713793	0.269804	-2.6456	0.00815456	0.0487782
DS10_00009852	73.7145	1.01014	0.381867	2.64527	0.00816261	0.0487966
DS10_00007750	376.704	0.778951	0.294638	2.64376	0.00819916	0.0489853
DS10_00011090	1030.98	0.657343	0.248861	2.64141	0.00825613	0.0492956
DS10_00009976	338.772	0.878912	0.332951	2.63976	0.00829647	0.0495063
DS10_00006225	1012.91	1.11781	0.423622	2.63871	0.00832232	0.0496304
DS10_00007874	42.8034	-1.02134	0.38713	-2.63823	0.00833395	0.0496695
DS10_00008535	36945	-0.337075	0.127809	-2.63735	0.00835576	0.0497693
DS10_00002061	513.698	-0.787927	0.298927	-2.63585	0.00839258	0.049928
DS10_00007501	1841.12	0.825241	0.313059	2.63606	0.00838759	0.049928
DS10_00000039	2411.99	0.702477	0.26656	2.63535	0.00840512	0.0499723
DS10_00001282	1935.66	0.410231	0.155682	2.63506	0.00841233	0.0499848
DS10_00005342	2283.31	0.751305	0.285177	2.63452	0.00842572	0.0500341
DS10_00010510	84.7763	1.23833	0.47014	2.63395	0.00843976	0.0500871
DS10_00012822	375.865	-1.09882	0.41743	-2.63234	0.00847995	0.0502952
DS10_00005831	93.0428	-0.99465	0.377971	-2.63155	0.00849955	0.050381
DS10_00005708	1669.55	-0.949176	0.360894	-2.63007	0.00853673	0.0505709
DS10_00010587	406.053	0.549612	0.20902	2.62947	0.00855186	0.0506299
DS10_00002017	2318.89	-0.627244	0.238646	-2.62834	0.00858022	0.0506755
DS10_00004025	2988.46	-0.671536	0.255459	-2.62874	0.00857018	0.0506755
DS10_00010353	207.385	1.09778	0.417668	2.62836	0.00857972	0.0506755
DS10_00013018	27.7651	-1.16437	0.442983	-2.62847	0.00857709	0.0506755
DS10_00008587	841.365	0.5929	0.225615	2.62793	0.00859071	0.0507069
DS10_00002262	926.992	-0.776726	0.295767	-2.62614	0.00863596	0.0509433
DS10_00003787	38.4614	-0.956779	0.364434	-2.62538	0.00865519	0.0510261
DS10_00001212	3174.17	0.623176	0.237386	2.62516	0.00866076	0.0510283
DS10_00010473	1208.39	0.34082	0.129969	2.62232	0.0087333	0.0514248
DS10_00003198	546.83	-0.463002	0.176625	-2.62139	0.0087573	0.0515352
DS10_00002146	663.56	-0.521827	0.19912	-2.62067	0.0087758	0.0515822
DS10_00003757	781.271	0.625347	0.238603	2.62086	0.00877072	0.0515822
DS10_00000884	188.598	0.72486	0.276634	2.62029	0.00878563	0.051609
DS10_00005482	552.164	-0.597031	0.227943	-2.61921	0.00881331	0.0517406
DS10_00006864	76.5476	0.864414	0.330119	2.61849	0.0088319	0.0518187
DS10_00013120	400.421	0.523242	0.199848	2.6182	0.00883941	0.0518318
DS10_00001513	1565.8	0.676421	0.258658	2.61512	0.00891962	0.0521774
DS10_00007225	1104.37	1.04054	0.397888	2.61515	0.0089189	0.0521774
DS10_00010693	368.797	1.07983	0.412837	2.61564	0.00890608	0.0521774
DS10_00013016	177.958	0.889218	0.340014	2.61524	0.00891651	0.0521774
DS10_00009597	625.88	0.749236	0.286604	2.61419	0.00894398	0.0522887
DS10_00009066	394.856	-0.49625	0.190086	-2.61066	0.00903669	0.0527992
DS10_00004093	222.674	-0.606484	0.232331	-2.61044	0.00904271	0.052803
DS10_00004795	3092.19	0.499998	0.191568	2.61003	0.00905352	0.0528346
DS10_00000506	152.558	0.550755	0.211058	2.60949	0.00906769	0.0528859
DS10_00002506	8211.91	0.613639	0.23519	2.60912	0.00907759	0.0529122
DS10_00004291	807.824	0.577064	0.221194	2.60886	0.00908456	0.0529213
DS10_00003988	118.203	-1.13588	0.435645	-2.60734	0.00912478	0.0531241
DS10_00004487	361.369	-0.67265	0.258006	-2.60711	0.00913104	0.053129
DS10_00007202	519.873	0.424137	0.162731	2.60638	0.00915061	0.0532113
DS10_00005552	47.6392	-0.966994	0.371522	-2.60279	0.00924676	0.0537386
DS10_00006285	2047.76	0.587766	0.225862	2.60232	0.00925955	0.053781
DS10_00006699	175.627	1.0508	0.40385	2.60196	0.00926927	0.0538056
DS10_00002455	1090.8	0.46226	0.177723	2.60101	0.00929499	0.053923
DS10_00009617	341.416	-0.525372	0.202157	-2.59883	0.0093541	0.0542339
DS10_00004786	75.1477	0.844983	0.325243	2.59801	0.00937669	0.0543327
DS10_00001586	29.7653	-1.24845	0.480587	-2.59776	0.00938332	0.0543391
DS10_00007644	318.738	0.857859	0.330399	2.59644	0.00941966	0.0545173
DS10_00006388	1387.05	0.422859	0.162912	2.59562	0.00944192	0.0546139
DS10_00007628	1264.87	0.671235	0.258804	2.5936	0.00949765	0.0549039
DS10_00002387	807.893	-0.493517	0.190326	-2.59301	0.0095141	0.0549666
DS10_00007231	123.953	-0.702117	0.270877	-2.59201	0.00954163	0.0550932
DS10_00011339	637.107	-0.362189	0.139771	-2.5913	0.0095613	0.0551743
DS10_00010369	1732.41	-0.695517	0.268648	-2.58895	0.00962689	0.0555201
DS10_00006233	3014.17	-0.421209	0.162718	-2.58858	0.00963721	0.055547
DS10_00006466	776.161	1.04353	0.403218	2.588	0.00965354	0.0556085
DS10_00000671	2591.8	0.936444	0.361973	2.58705	0.00968004	0.0557284
DS10_00006076	103.245	0.846997	0.327489	2.58634	0.00970014	0.0558114
DS10_00000126	878.773	0.403153	0.155962	2.58494	0.00973952	0.0559917
DS10_00006441	4415.57	0.523748	0.202624	2.58482	0.00974289	0.0559917
DS10_00012760	1189.32	0.320027	0.123903	2.58288	0.00979783	0.0562744
DS10_00003686	386.506	0.511724	0.198143	2.5826	0.00980591	0.0562879
DS10_00001040	263.043	0.87659	0.339535	2.58174	0.00983042	0.0563353
DS10_00006869	1320.72	0.366949	0.142121	2.58194	0.0098246	0.0563353
DS10_00011938	199.52	-0.784303	0.303793	-2.5817	0.00983139	0.0563353
DS10_00002745	9442.79	-0.407871	0.158004	-2.58139	0.00984037	0.0563538
DS10_00002535	1098.9	-0.499686	0.193643	-2.58045	0.00986724	0.056376
DS10_00003344	503.908	1.04361	0.404364	2.58086	0.00985542	0.056376
DS10_00006649	116.486	0.837573	0.324564	2.58061	0.0098625	0.056376
DS10_00010408	435.598	-0.94678	0.366878	-2.58064	0.00986178	0.056376
DS10_00011791	9.27191	1.20123	0.465645	2.57972	0.00988809	0.0564623
DS10_00006955	1528.01	0.356352	0.138234	2.5779	0.00994027	0.0567272
DS10_00000660	2711.51	0.645944	0.250705	2.57651	0.00998045	0.0568947
DS10_00002183	182.283	0.738303	0.286555	2.57648	0.00998122	0.0568947
DS10_00008016	467.361	0.401361	0.155849	2.57532	0.0100148	0.057053
DS10_00011088	5586.87	-0.351766	0.136651	-2.57419	0.0100474	0.0572054
DS10_00007447	1656.32	-0.729928	0.28359	-2.57388	0.0100565	0.0572242
DS10_00010637	75.1654	-0.841336	0.326945	-2.57333	0.0100726	0.0572826
DS10_00013047	147.741	0.732956	0.284949	2.57224	0.0101043	0.0574294
DS10_00011671	359.124	-0.517895	0.201401	-2.57146	0.010127	0.0575251
DS10_00005716	12650.5	-0.895001	0.348221	-2.57021	0.0101637	0.0577003
DS10_00000713	1908.86	-0.437761	0.170381	-2.56931	0.0101901	0.057783
DS10_00010947	763.436	0.852381	0.331734	2.56947	0.0101854	0.057783
DS10_00009842	382.508	-0.574544	0.223849	-2.56665	0.0102685	0.0581943
DS10_00003811	39675.3	0.342426	0.133453	2.56589	0.0102912	0.058222
DS10_00005734	2618.77	-0.728055	0.28374	-2.56592	0.0102903	0.058222
DS10_00007549	3024.02	-0.642294	0.250304	-2.56606	0.0102862	0.058222
DS10_00000146	461.446	-0.803219	0.313277	-2.56392	0.0103496	0.0584606
DS10_00006950	253.414	-0.601537	0.234621	-2.56387	0.0103513	0.0584606
DS10_00007666	1632.87	-0.3426	0.133616	-2.56406	0.0103455	0.0584606
DS10_00012664	207.041	0.980413	0.382483	2.56329	0.0103687	0.0585251
DS10_00005851	13765.8	-0.66185	0.258298	-2.56235	0.0103965	0.0586452
DS10_00006062	693.694	0.513239	0.200314	2.56217	0.0104019	0.0586452
DS10_00001539	1526.39	-0.419371	0.163744	-2.56114	0.0104329	0.058786
DS10_00010191	168.358	-0.7552	0.294976	-2.56021	0.0104609	0.0588763
DS10_00013515	26.7278	1.11848	0.436843	2.56037	0.010456	0.0588763
DS10_00002793	1587.92	0.496185	0.193828	2.55992	0.0104695	0.0588909
DS10_00003876	14924.9	-0.738264	0.288436	-2.55954	0.010481	0.0589025
DS10_00004995	28.0385	1.23341	0.481904	2.55946	0.0104836	0.0589025
DS10_00001658	340.001	1.00642	0.393284	2.55902	0.0104968	0.0589092
DS10_00002480	788.761	0.785641	0.307001	2.55909	0.0104948	0.0589092
DS10_00003818	841.966	-0.384666	0.150353	-2.55842	0.010515	0.0589777
DS10_00006526	4967.35	0.601243	0.235096	2.55743	0.0105448	0.0591109
DS10_00000643	2356.97	-0.813084	0.318028	-2.55664	0.0105688	0.0591814
DS10_00007845	10613.7	0.56347	0.220396	2.55662	0.0105694	0.0591814
DS10_00009844	13228.5	-0.704961	0.27583	-2.55578	0.010595	0.0592911
DS10_00003154	5541.48	-0.448566	0.175618	-2.55421	0.0106428	0.0595246
DS10_00008329	158.239	0.792204	0.310397	2.55222	0.0107037	0.0598312
DS10_00006402	655.621	-0.414591	0.162489	-2.55149	0.0107262	0.0599228
DS10_00000136	1559.17	0.756064	0.29637	2.55108	0.0107391	0.0599603
DS10_00001181	99.6179	-0.818301	0.320968	-2.54948	0.0107885	0.0602021
DS10_00009487	1256.2	0.338552	0.132839	2.54859	0.010816	0.0603209
DS10_00007661	677.665	-0.648948	0.254823	-2.54666	0.010876	0.0606212
DS10_00012851	4447.23	-0.553943	0.217612	-2.54555	0.0109105	0.0607791
DS10_00000189	724.057	0.850691	0.334367	2.54418	0.0109535	0.0609492
DS10_00001055	433.328	0.907542	0.356701	2.54427	0.0109507	0.0609492
DS10_00010038	2315.81	-0.385917	0.151843	-2.54155	0.0110362	0.0613749
DS10_00009902	3420.97	-0.358744	0.141205	-2.54058	0.0110669	0.0614933
DS10_00011388	343.794	-0.888281	0.349651	-2.54048	0.0110701	0.0614933
DS10_00005428	155.523	0.829647	0.326637	2.53997	0.0110862	0.0615481
DS10_00007578	2611.76	-0.374713	0.147558	-2.53942	0.0111036	0.0616101
DS10_00007461	679.36	0.634697	0.250076	2.53802	0.0111482	0.0617873
DS10_00010494	595.412	0.967745	0.381299	2.53802	0.0111482	0.0617873
DS10_00006235	47.0094	-0.975657	0.384574	-2.53698	0.0111812	0.0619356
DS10_00008795	27.462	-1.19193	0.469953	-2.53628	0.0112036	0.0620242
DS10_00006898	2668.95	-0.627727	0.247576	-2.53549	0.0112289	0.0621297
DS10_00008147	15.3172	1.23367	0.486619	2.53519	0.0112387	0.0621486
DS10_00004538	366.718	0.776437	0.306302	2.53488	0.0112486	0.0621685
DS10_00002713	566.333	-0.467418	0.184468	-2.53387	0.0112812	0.0623133
DS10_00001285	920.126	-0.573881	0.226623	-2.53232	0.0113312	0.0624838
DS10_00006122	48.0568	1.20395	0.475369	2.53266	0.0113202	0.0624838
DS10_00008842	4.97158	1.14433	0.451885	2.53236	0.0113299	0.0624838
DS10_00008588	592.302	0.571548	0.225933	2.52973	0.0114151	0.0629111
DS10_00010500	203.219	0.900975	0.356203	2.52939	0.0114262	0.0629373
DS10_00006665	12928.2	0.316602	0.125265	2.52746	0.0114891	0.063248
DS10_00007602	1487.58	-0.540773	0.214095	-2.52586	0.0115416	0.0635017
DS10_00008576	447.684	0.424585	0.168139	2.5252	0.0115634	0.0635622
DS10_00011824	165.152	-0.73473	0.290967	-2.52513	0.0115656	0.0635622
DS10_00005005	5413.77	0.66415	0.263047	2.52483	0.0115753	0.0635801
DS10_00010341	994.583	0.498333	0.197493	2.52329	0.0116262	0.0638235
DS10_00008794	2209.07	-0.518966	0.205741	-2.52243	0.0116547	0.0639442
DS10_00003105	696.952	0.482334	0.191237	2.52217	0.0116632	0.0639553
DS10_00001609	504.629	-0.715731	0.283918	-2.52091	0.0117052	0.06415
DS10_00000154	6230.39	-0.915405	0.363233	-2.52016	0.0117301	0.0641785
DS10_00007000	597.077	1.00609	0.39921	2.52021	0.0117285	0.0641785
DS10_00008506	909.234	0.479944	0.190412	2.52055	0.0117172	0.0641785
DS10_00011270	279.236	0.83257	0.330445	2.51954	0.0117507	0.0642558
DS10_00006280	263.133	-0.494041	0.196101	-2.51932	0.0117582	0.0642609
DS10_00002556	569.51	0.495075	0.196561	2.51869	0.0117793	0.0642684
DS10_00005512	3171.72	0.52898	0.210017	2.51875	0.0117773	0.0642684
DS10_00011673	1104.35	-0.816712	0.324246	-2.5188	0.0117755	0.0642684
DS10_00004671	2759.26	-0.356989	0.141836	-2.51691	0.0118391	0.0645588
DS10_00002317	4292.01	-0.412203	0.163844	-2.51582	0.0118754	0.064712
DS10_00002558	331.178	-1.22956	0.488761	-2.51568	0.0118804	0.064712
DS10_00010340	222.748	0.822287	0.326958	2.51496	0.0119044	0.0648072
DS10_00000429	3709.97	-0.349221	0.138905	-2.51409	0.0119339	0.0648596
DS10_00005714	94.0756	0.716484	0.284975	2.5142	0.0119301	0.0648596
DS10_00011643	942.557	-0.64398	0.256139	-2.51418	0.0119309	0.0648596
DS10_00005432	145.754	-0.561311	0.223313	-2.51356	0.011952	0.0649219
DS10_00004303	1060.88	0.667397	0.26561	2.5127	0.0119812	0.0649825
DS10_00004773	99.9187	-0.652679	0.259725	-2.51297	0.0119721	0.0649825
DS10_00006703	701.081	0.457575	0.182123	2.51245	0.0119896	0.0649825
DS10_00009473	1069.84	-0.721034	0.286983	-2.51246	0.0119892	0.0649825
DS10_00005271	801.663	0.758347	0.301902	2.5119	0.0120084	0.0650211
DS10_00012810	111.965	-0.690381	0.27485	-2.51185	0.01201	0.0650211
DS10_00008223	1502.76	0.328881	0.13098	2.51092	0.0120416	0.0651564
DS10_00009033	77.237	0.899625	0.358399	2.51012	0.0120691	0.0652689
DS10_00010873	105.509	-0.856218	0.341206	-2.50939	0.012094	0.0653676
DS10_00006525	1439.82	-0.56044	0.223357	-2.50916	0.0121017	0.0653733
DS10_00005086	16859.4	0.396196	0.157914	2.50894	0.0121094	0.0653789
DS10_00001426	1213.16	-0.467143	0.186305	-2.50742	0.0121617	0.0656051
DS10_00004904	16284.7	-0.552503	0.220372	-2.50714	0.0121714	0.0656051
DS10_00011993	207.926	0.666736	0.265933	2.50716	0.0121706	0.0656051
DS10_00002661	77.0409	-1.14119	0.455278	-2.50658	0.0121905	0.0656723
DS10_00005046	8060.09	0.693075	0.276527	2.50635	0.0121984	0.0656783
DS10_00000308	433.965	1.03548	0.413245	2.50572	0.0122202	0.0657599
DS10_00011056	271.158	-0.723847	0.288917	-2.50538	0.0122321	0.0657879
DS10_00008994	167.234	-0.696554	0.278058	-2.50506	0.012243	0.0658101
DS10_00005693	7879.82	-0.362526	0.144844	-2.50287	0.0123192	0.0661834
DS10_00008316	769.737	0.353343	0.141215	2.50217	0.0123434	0.066239
DS10_00010743	296.428	0.829132	0.331392	2.50197	0.0123505	0.066239
DS10_00011724	243.048	-0.459688	0.183743	-2.5018	0.0123565	0.066239
DS10_00012330	41.6877	-1.18676	0.474311	-2.50207	0.012347	0.066239
DS10_00000094	1055.36	0.35951	0.143775	2.50051	0.0124016	0.0664445
DS10_00002355	661.18	0.407416	0.162955	2.50017	0.0124132	0.0664705
DS10_00003215	37.3269	-1.16517	0.46612	-2.49972	0.0124291	0.066519
DS10_00001791	984.993	0.411192	0.16451	2.49949	0.0124372	0.0665261
DS10_00004738	2006.04	0.73942	0.295901	2.49888	0.0124587	0.0666048
DS10_00007420	2493.71	0.729643	0.292043	2.49841	0.0124752	0.0666565
DS10_00008421	7536.58	0.321734	0.128799	2.49795	0.0124914	0.0667067
DS10_00008197	2704.24	0.553067	0.221484	2.49709	0.0125216	0.0668319
DS10_00003196	815.348	-0.360703	0.144559	-2.49519	0.0125889	0.0671547
DS10_00006524	1475.58	-0.563098	0.225701	-2.49488	0.0125999	0.0671766
DS10_00000259	1335.07	0.538136	0.215716	2.49465	0.012608	0.0671833
DS10_00000951	40.5949	-1.20597	0.483618	-2.49364	0.012644	0.0673386
DS10_00007127	184.394	0.548919	0.220432	2.4902	0.0127671	0.0679575
DS10_00000794	2940.06	-0.449749	0.18065	-2.48962	0.012788	0.0680226
DS10_00001097	46.881	0.850606	0.341681	2.48947	0.0127932	0.0680226
DS10_00012204	24.9981	1.06056	0.426246	2.48814	0.0128414	0.0682417
DS10_00001590	1092.01	0.646862	0.260129	2.48669	0.0128936	0.068482
DS10_00006569	4231.75	-0.300194	0.120735	-2.48638	0.0129049	0.0685048
DS10_00001806	368.544	-0.507245	0.204069	-2.48566	0.0129312	0.0686072
DS10_00007982	90.0113	1.12279	0.451886	2.48468	0.0129669	0.0687598
DS10_00006846	2969.58	-1.20346	0.484839	-2.48218	0.0130581	0.0692058
DS10_00009140	921.393	1.11982	0.451496	2.48024	0.0131296	0.069547
DS10_00005362	2443.66	0.403461	0.16269	2.47994	0.0131403	0.0695662
DS10_00004296	239.39	0.889715	0.358852	2.47934	0.0131626	0.0696468
DS10_00004252	772.04	-0.673986	0.271875	-2.47903	0.0131739	0.0696689
DS10_00008695	832.271	0.594187	0.239753	2.47832	0.0132001	0.0697537
DS10_00011876	1422.05	0.319104	0.128764	2.47822	0.0132041	0.0697537
DS10_00010816	608.226	0.811845	0.327759	2.47696	0.0132507	0.069962
DS10_00004863	200.487	0.496311	0.200414	2.47642	0.0132706	0.069992
DS10_00010470	3067.2	0.510201	0.206011	2.47657	0.0132652	0.069992
DS10_00007324	988.434	0.388214	0.156816	2.4756	0.0133011	0.0700782
DS10_00012765	149.97	0.840541	0.33953	2.4756	0.0133013	0.0700782
DS10_00003014	856.326	0.823149	0.332573	2.4751	0.0133201	0.0701395
DS10_00012312	759.729	0.582133	0.235233	2.47471	0.0133345	0.070178
DS10_00000270	2076.16	0.382481	0.154604	2.47394	0.0133631	0.0702527
DS10_00007866	840.671	0.335078	0.135438	2.47404	0.0133595	0.0702527
DS10_00002645	102.567	0.738255	0.298437	2.47374	0.0133707	0.0702551
DS10_00006666	2583.62	0.458555	0.185386	2.47352	0.0133791	0.0702616
DS10_00011751	234958	-0.519361	0.210045	-2.47261	0.013413	0.0704019
DS10_00003683	97.3971	0.970352	0.392506	2.4722	0.0134286	0.0704462
DS10_00002617	5.72571	1.10522	0.447184	2.47151	0.0134545	0.0705444
DS10_00001423	1106.45	-0.410682	0.166216	-2.47078	0.0134819	0.0706501
DS10_00005652	386.696	0.599003	0.242538	2.46973	0.0135214	0.0708195
DS10_00012437	339.7	0.84942	0.343986	2.46934	0.0135362	0.0708592
DS10_00001962	877.003	0.588157	0.238217	2.469	0.0135492	0.0708795
DS10_00009395	294.174	0.454096	0.18393	2.46886	0.0135545	0.0708795
DS10_00001561	24.4553	1.21233	0.491273	2.46773	0.0135975	0.0709329
DS10_00006142	1204.65	0.542941	0.220003	2.46788	0.0135914	0.0709329
DS10_00006246	639.064	0.471506	0.191023	2.46832	0.013575	0.0709329
DS10_00006576	771.81	0.466241	0.188902	2.46816	0.0135809	0.0709329
DS10_00011991	12353.7	-0.385138	0.156076	-2.46763	0.0136009	0.0709329
DS10_00006094	82.588	-0.764615	0.309932	-2.46704	0.0136236	0.0710136
DS10_00007369	3707.58	-0.980281	0.397449	-2.46643	0.0136468	0.0710966
DS10_00008121	2555.69	-0.883162	0.358415	-2.46408	0.0137366	0.0715268
DS10_00006236	198.944	0.777727	0.315762	2.46302	0.0137772	0.0717001
DS10_00003301	2145.92	-0.722775	0.293592	-2.46183	0.0138229	0.0718995
DS10_00004083	144.757	-0.672753	0.27334	-2.46123	0.0138463	0.0719831
DS10_00002383	1221.62	0.344313	0.139911	2.46094	0.0138575	0.0720032
DS10_00001723	136.054	-0.848162	0.344738	-2.46031	0.0138816	0.0720901
DS10_00001552	203.232	0.720528	0.292905	2.45994	0.0138961	0.0721273
DS10_00006002	16.9192	1.12058	0.455787	2.45856	0.0139494	0.0723657
DS10_00006957	114.402	0.99021	0.402927	2.45754	0.0139892	0.0724954
DS10_00009521	152.382	0.707188	0.287744	2.4577	0.0139831	0.0724954
DS10_00006696	3154.58	0.412329	0.167797	2.4573	0.0139984	0.0725049
DS10_00000769	2005.93	-0.475352	0.193467	-2.45701	0.0140097	0.0725252
DS10_00004499	2249.43	0.451062	0.183719	2.45517	0.0140817	0.0728212
DS10_00007895	318.005	-0.482554	0.196532	-2.45535	0.0140748	0.0728212
DS10_00006212	3945.74	0.443779	0.180804	2.45448	0.0141089	0.072923
DS10_00012635	797.769	-0.667731	0.272131	-2.45371	0.0141391	0.0730081
DS10_00013207	21.2558	-1.20254	0.490097	-2.45368	0.0141402	0.0730081
DS10_00010950	1381.08	0.851788	0.347223	2.45315	0.0141613	0.0730786
DS10_00003726	594.489	-0.462293	0.188471	-2.45286	0.0141724	0.0730974
DS10_00008182	1671.64	-0.92538	0.377311	-2.45257	0.014184	0.073119
DS10_00006853	2185.38	0.489234	0.1995	2.4523	0.0141946	0.0731351
DS10_00007284	184.537	0.777718	0.317229	2.4516	0.0142224	0.0732399
DS10_00001441	925.758	-0.509282	0.207755	-2.45136	0.0142317	0.0732491
DS10_00003166	1502.92	0.472263	0.192692	2.45087	0.0142513	0.0733114
DS10_00010077	358.715	0.778966	0.317894	2.4504	0.0142699	0.0733689
DS10_00001176	485.318	-0.45856	0.187173	-2.44993	0.0142885	0.0734261
DS10_00001655	160.082	0.683969	0.279297	2.44889	0.0143297	0.0735991
DS10_00004590	883.614	-0.742595	0.303298	-2.4484	0.0143493	0.0736612
DS10_00005203	4462.39	-0.388058	0.158589	-2.44693	0.0144078	0.0739228
DS10_00011523	4.69881	1.09466	0.447524	2.44603	0.0144439	0.0740693
DS10_00012487	260.994	1.05854	0.432822	2.44567	0.0144582	0.074104
DS10_00011929	965.321	0.425635	0.174162	2.44391	0.0145291	0.0744287
DS10_00001101	84.9055	0.908541	0.37211	2.44159	0.0146226	0.0748221
DS10_00001547	613.801	-0.536435	0.219721	-2.44144	0.0146288	0.0748221
DS10_00004095	172.945	0.813797	0.33332	2.44149	0.0146267	0.0748221
DS10_00003617	3044.69	0.315792	0.129461	2.43928	0.0147166	0.0752317
DS10_00001531	1039.95	0.42501	0.174298	2.43841	0.014752	0.0753734
DS10_00002439	574.757	0.992649	0.407192	2.43779	0.0147772	0.0754629
DS10_00005808	70.319	-0.921743	0.378164	-2.43742	0.0147927	0.0755027
DS10_00003596	3398.96	0.521458	0.213988	2.43686	0.0148154	0.0755318
DS10_00007805	167.232	0.689234	0.282815	2.43705	0.0148078	0.0755318
DS10_00010013	3334.05	-0.450541	0.184897	-2.43671	0.0148215	0.0755318
DS10_00008987	1824.02	0.405509	0.166475	2.43586	0.0148566	0.0756714
DS10_00001519	1266.15	0.527489	0.216708	2.4341	0.014929	0.0758857
DS10_00005069	121.579	0.63682	0.261611	2.43423	0.0149235	0.0758857
DS10_00005140	300.196	-0.782276	0.321384	-2.43408	0.0149296	0.0758857
DS10_00005334	128.568	1.07646	0.442204	2.43431	0.0149203	0.0758857
DS10_00008685	4362.42	0.240096	0.0986599	2.43358	0.0149505	0.0759525
DS10_00001262	1959.53	-0.4271	0.17561	-2.43209	0.0150119	0.0762193
DS10_00005610	800.388	-0.541409	0.222625	-2.43193	0.0150185	0.0762193
DS10_00002948	60.1865	-1.15439	0.474815	-2.43124	0.0150474	0.0762868
DS10_00005435	969.427	0.391299	0.160945	2.43127	0.0150462	0.0762868
DS10_00010501	435.008	0.520699	0.214223	2.43064	0.0150723	0.0763735
DS10_00013466	523.607	-0.583599	0.240185	-2.42979	0.0151075	0.0765126
DS10_00004787	31.5221	1.06331	0.437665	2.4295	0.0151196	0.0765344
DS10_00005415	785.002	0.593681	0.24443	2.42884	0.0151471	0.076634
DS10_00000049	956.764	0.33823	0.139363	2.42696	0.0152258	0.076926
DS10_00001463	491.248	0.628264	0.258871	2.42694	0.0152268	0.076926
DS10_00003948	184.852	1.02403	0.421948	2.4269	0.0152284	0.076926
DS10_00013064	664.692	0.409405	0.16875	2.42611	0.0152616	0.0770544
DS10_00006440	4736.21	0.502805	0.207393	2.42441	0.0153332	0.0773361
DS10_00010529	647.932	-0.414998	0.171172	-2.42444	0.0153318	0.0773361
DS10_00004334	468.565	-0.528	0.217833	-2.42387	0.0153559	0.0774095
DS10_00009729	166.727	0.595603	0.245742	2.42369	0.0153635	0.0774095
DS10_00010018	265.665	0.842608	0.347909	2.42192	0.0154388	0.0777486
DS10_00005592	727.908	0.612035	0.252813	2.4209	0.015482	0.0778864
DS10_00009022	227.589	-0.628971	0.259789	-2.42109	0.0154741	0.0778864
DS10_00006940	2379.46	0.867998	0.358632	2.4203	0.0155076	0.0779754
DS10_00003346	5094.86	-0.556685	0.230073	-2.4196	0.0155376	0.0780355
DS10_00007459	373.091	0.623472	0.257651	2.41983	0.0155278	0.0780355
DS10_00009605	800.242	1.02798	0.424879	2.41946	0.0155435	0.0780355
DS10_00009950	11669.3	0.459046	0.189765	2.41903	0.0155621	0.0780889
DS10_00004753	140.005	0.660384	0.273141	2.41774	0.0156173	0.0783259
DS10_00004564	640.739	0.785254	0.324814	2.41755	0.0156253	0.0783261
DS10_00010298	85.6317	-0.69091	0.285862	-2.41694	0.0156516	0.078418
DS10_00001684	438.059	-0.389081	0.161038	-2.41609	0.0156883	0.0785213
DS10_00010015	18.8658	1.17586	0.486648	2.41624	0.0156819	0.0785213
DS10_00008231	809.503	-0.601094	0.248812	-2.41586	0.0156982	0.078531
DS10_00001464	3137.59	0.334516	0.13851	2.41511	0.0157306	0.0786531
DS10_00002126	598.301	-0.585451	0.242618	-2.41306	0.0158194	0.0790567
DS10_00000269	250.288	0.469268	0.194648	2.41086	0.015915	0.0794164
DS10_00002070	3387.6	0.254042	0.105389	2.41053	0.0159295	0.0794164
DS10_00004781	935.896	-0.762044	0.316139	-2.41047	0.0159318	0.0794164
DS10_00006075	220.981	-0.757887	0.314408	-2.41052	0.0159298	0.0794164
DS10_00006325	186.988	0.653516	0.271097	2.41064	0.0159247	0.0794164
DS10_00009848	278.36	0.862801	0.35809	2.40945	0.0159766	0.079599
DS10_00004117	155.248	-0.599189	0.248793	-2.40838	0.0160235	0.0797922
DS10_00000176	207.938	0.606623	0.251944	2.40777	0.0160505	0.079886
DS10_00004132	25.8274	-0.982291	0.408047	-2.4073	0.016071	0.0799475
DS10_00006924	51.2774	1.08064	0.449069	2.40641	0.0161102	0.0801021
DS10_00006109	540.463	0.877618	0.364772	2.40594	0.016131	0.0801647
DS10_00012992	946.024	-0.47175	0.196207	-2.40435	0.0162014	0.080474
DS10_00012245	3368.4	-0.447619	0.186207	-2.40388	0.016222	0.0805354
DS10_00001789	1766.44	0.460975	0.191829	2.40306	0.0162586	0.0806761
DS10_00010299	5887.79	0.250469	0.104282	2.40185	0.0163123	0.0809018
DS10_00007092	3056.53	-0.63421	0.264078	-2.4016	0.0163234	0.080916
DS10_00006315	1445.89	-0.543542	0.226502	-2.39973	0.0164074	0.0812911
DS10_00013224	466.407	0.838075	0.34946	2.3982	0.0164759	0.0815893
DS10_00000801	5099.79	0.424836	0.177184	2.39772	0.0164977	0.0816418
DS10_00006557	1223.76	-0.738009	0.307812	-2.39759	0.0165031	0.0816418
DS10_00003107	1061.7	0.528092	0.220405	2.396	0.016575	0.0819561
DS10_00012578	789.372	-0.500185	0.208778	-2.39577	0.0165854	0.0819664
DS10_00000026	725.621	-0.478156	0.199644	-2.39504	0.0166186	0.082006
DS10_00007974	38363.8	-0.403241	0.168352	-2.39522	0.0166104	0.082006
DS10_00011892	28.3822	-0.956507	0.399358	-2.39511	0.0166153	0.082006
DS10_00006297	94.8774	-0.640581	0.267611	-2.3937	0.0166793	0.0822643
DS10_00007215	1310.71	0.379815	0.158692	2.39342	0.0166922	0.0822869
DS10_00004827	146.17	-0.544882	0.227691	-2.39307	0.0167079	0.0823225
DS10_00006884	815.419	0.891256	0.37247	2.39283	0.0167191	0.0823363
DS10_00003651	120.032	1.02514	0.428702	2.39126	0.0167907	0.0826266
DS10_00012504	385.389	-0.837935	0.350429	-2.39117	0.0167948	0.0826266
DS10_00011926	351.759	0.48941	0.204696	2.39091	0.0168066	0.0826427
DS10_00001563	6925.55	0.306856	0.128377	2.39026	0.0168363	0.0827475
DS10_00001966	38.8273	-1.12464	0.470755	-2.38902	0.0168936	0.0829874
DS10_00005868	875.04	0.375346	0.157128	2.3888	0.0169037	0.0829958
DS10_00000067	1359.29	-0.428924	0.179685	-2.38709	0.0169823	0.0832734
[truncated: 11,585 more rows]
