# Supplementary material for: Molecular and behavioral studies reveal differences in olfaction between winter and summer morphs of Drosophila suzukii
Source: PeerJ. 2022 Sep 16;10:e13825. doi: 10.7717/peerj.13825 (PMC9484457; doi:10.7717/peerj.13825)
Supplement: Supplemental Information 5 [file peerj-10-13825-s005.xlsx]

## Sheet: Choice and survival data
trial	date	rep	temp	morphotype	time	responding	nonresponding	dead	alive	survival	total	responsep
1	2020-07-04	3	0	sm	24	2	6	3	8	0.727273	11	0.25
2	2020-07-04	3	0	sm	24	3	7	0	10	1	10	0.3
3	2020-07-04	3	0	sm	24	1	6	3	7	0.7	10	0.142857
4	2020-07-04	3	0	sm	24	0	9	1	9	0.9	10	0
5	2020-07-04	3	0	sm	24	0	6	5	6	0.545455	11	0
1	2020-07-04	3	0	wm	24	0	10	0	10	1	10	0
2	2020-07-04	3	0	wm	24	0	10	0	10	1	10	0
3	2020-07-04	3	0	wm	24	1	6	3	7	0.7	10	0.142857
4	2020-07-04	3	0	wm	24	0	9	1	9	0.9	10	0
5	2020-07-04	3	0	wm	24	0	10	0	10	1	10	0
1	2020-07-05	3	0	sm	24	2	6	3	8	0.727273	11	0.25
2	2020-07-05	3	0	sm	24	3	7	0	10	1	10	0.3
3	2020-07-05	3	0	sm	24	1	6	3	7	0.7	10	0.142857
4	2020-07-05	3	0	sm	24	0	9	1	9	0.9	10	0
5	2020-07-05	3	0	sm	24	0	6	5	6	0.545455	11	0
1	2020-07-05	3	0	wm	24	0	10	0	10	1	10	0
2	2020-07-05	3	0	wm	24	0	10	0	10	1	10	0
3	2020-07-05	3	0	wm	24	1	6	3	7	0.7	10	0.142857
4	2020-07-05	3	0	wm	24	0	9	0	9	1	9	0
5	2020-07-05	3	0	wm	24	0	10	0	10	1	10	0
1	2020-06-20	1	5	sm	24	0	12	0	12	1	12	0
2	2020-06-20	1	5	sm	24	0	11	0	11	1	11	0
3	2020-06-20	1	5	sm	24	0	12	0	12	1	12	0
4	2020-06-20	1	5	sm	24	0	9	0	9	1	9	0
5	2020-06-20	1	5	sm	24	0	11	0	11	1	11	0
1	2020-06-20	1	5	wm	24	0	10	0	10	1	10	0
2	2020-06-20	1	5	wm	24	0	9	0	9	1	9	0
3	2020-06-20	1	5	wm	24	0	10	0	10	1	10	0
4	2020-06-20	1	5	wm	24	0	10	0	10	1	10	0
5	2020-06-20	1	5	wm	24	0	10	0	10	1	10	0
6	2020-06-26	2	5	sm	24	0	10	0	10	1	10	0
7	2020-06-26	2	5	sm	24	0	12	0	12	1	12	0
8	2020-06-26	2	5	sm	24	0	10	0	10	1	10	0
9	2020-06-26	2	5	sm	24	0	8	0	8	1	8	0
10	2020-06-26	2	5	sm	24	0	11	0	11	1	11	0
6	2020-06-26	2	5	wm	24	0	10	0	10	1	10	0
7	2020-06-26	2	5	wm	24	0	11	0	11	1	11	0
8	2020-06-26	2	5	wm	24	0	10	0	10	1	10	0
9	2020-06-26	2	5	wm	24	0	10	0	10	1	10	0
10	2020-06-26	2	5	wm	24	0	10	0	10	1	10	0
11	2020-07-04	3	5	sm	24	2	8	0	10	1	10	0.2
12	2020-07-04	3	5	sm	24	1	9	2	10	0.833333	12	0.1
13	2020-07-04	3	5	sm	24	0	10	0	10	1	10	0
14	2020-07-04	3	5	sm	24	0	10	0	10	1	10	0
15	2020-07-04	3	5	sm	24	1	9	1	10	0.909091	11	0.1
11	2020-07-04	3	5	wm	24	0	10	0	10	1	10	0
12	2020-07-04	3	5	wm	24	1	9	0	10	1	10	0.1
13	2020-07-04	3	5	wm	24	0	11	0	11	1	11	0
14	2020-07-04	3	5	wm	24	0	11	0	11	1	11	0
15	2020-07-04	3	5	wm	24	0	8	2	8	0.8	10	0
1	2020-06-20	1	10	sm	24	0	10	0	10	1	10	0
2	2020-06-20	1	10	sm	24	0	10	0	10	1	10	0
3	2020-06-20	1	10	sm	24	0	10	0	10	1	10	0
4	2020-06-20	1	10	sm	24	0	10	0	10	1	10	0
5	2020-06-20	1	10	sm	24	0	9	0	9	1	9	0
1	2020-06-20	1	10	wm	24	0	9	0	9	1	9	0
2	2020-06-20	1	10	wm	24	0	10	0	10	1	10	0
3	2020-06-20	1	10	wm	24	0	10	0	10	1	10	0
4	2020-06-20	1	10	wm	24	0	9	1	9	0.9	10	0
5	2020-06-20	1	10	wm	24	0	12	0	12	1	12	0
6	2020-06-26	2	10	sm	24	0	10	0	10	1	10	0
7	2020-06-26	2	10	sm	24	1	10	0	11	1	11	0.0909091
8	2020-06-26	2	10	sm	24	1	7	2	6	0.75	8	0.125
9	2020-06-26	2	10	sm	24	1	9	0	10	1	10	0.1
10	2020-06-26	2	10	sm	24	0	10	0	10	1	10	0
6	2020-06-26	2	10	wm	24	0	10	0	10	1	10	0
7	2020-06-26	2	10	wm	24	2	7	0	9	1	9	0.222222
8	2020-06-26	2	10	wm	24	0	10	0	10	1	10	0
9	2020-06-26	2	10	wm	24	1	9	0	10	1	10	0.1
10	2020-06-26	2	10	wm	24	2	6	1	7	0.875	8	0.25
11	2020-07-04	3	10	sm	24	0	10	0	10	1	10	0
12	2020-07-04	3	10	sm	24	0	10	0	10	1	10	0
13	2020-07-04	3	10	sm	24	3	8	0	11	1	11	0.272727
14	2020-07-04	3	10	sm	24	4	6	0	10	1	10	0.4
15	2020-07-04	3	10	sm	24	0	10	0	10	1	10	0
11	2020-07-04	3	10	wm	24	2	7	1	9	0.9	10	0.222222
12	2020-07-04	3	10	wm	24	0	8	1	8	0.888889	9	0
13	2020-07-04	3	10	wm	24	1	9	0	10	1	10	0.1
14	2020-07-04	3	10	wm	24	1	9	1	10	0.909091	11	0.1
15	2020-07-04	3	10	wm	24	0	8	3	8	0.727273	11	0
1	2020-06-20	1	15	sm	24	1	8	0	10	1	10	0.111111
2	2020-06-20	1	15	sm	24	2	8	0	10	1	10	0.2
3	2020-06-20	1	15	sm	24	0	10	0	10	1	10	0
4	2020-06-20	1	15	sm	24	0	10	0	10	1	10	0
5	2020-06-20	1	15	sm	24	1	9	0	10	1	10	0.1
1	2020-06-20	1	15	wm	24	2	9	0	11	1	11	0.181818
2	2020-06-20	1	15	wm	24	0	10	0	10	1	10	0
3	2020-06-20	1	15	wm	24	2	8	0	10	1	10	0.2
4	2020-06-20	1	15	wm	24	1	8	0	10	1	10	0.111111
5	2020-06-20	1	15	wm	24	0	10	0	10	1	10	0
6	2020-06-26	2	15	sm	24	3	7	0	10	1	10	0.3
7	2020-06-26	2	15	sm	24	3	7	0	10	1	10	0.3
8	2020-06-26	2	15	sm	24	6	4	0	10	1	10	0.6
9	2020-06-26	2	15	sm	24	5	5	0	10	1	10	0.5
10	2020-06-26	2	15	sm	24	4	5	0	9	1	9	0.444444
6	2020-06-26	2	15	wm	24	2	9	0	11	1	11	0.181818
7	2020-06-26	2	15	wm	24	3	8	0	11	1	11	0.272727
8	2020-06-26	2	15	wm	24	2	8	0	10	1	10	0.2
9	2020-06-26	2	15	wm	24	2	8	0	10	1	10	0.2
10	2020-06-26	2	15	wm	24	3	7	0	10	1	10	0.3
11	2020-07-04	3	15	sm	24	5	6	0	11	1	11	0.454545
12	2020-07-04	3	15	sm	24	6	4	0	10	1	10	0.6
13	2020-07-04	3	15	sm	24	2	7	0	9	1	9	0.222222
14	2020-07-04	3	15	sm	24	5	5	0	10	1	10	0.5
15	2020-07-04	3	15	sm	24	2	7	1	9	0.9	10	0.222222
11	2020-07-04	3	15	wm	24	1	9	0	10	1	10	0.1
12	2020-07-04	3	15	wm	24	1	9	0	10	1	10	0.1
13	2020-07-04	3	15	wm	24	2	7	0	9	1	9	0.222222
14	2020-07-04	3	15	wm	24	3	8	0	11	1	11	0.272727
15	2020-07-04	3	15	wm	24	1	9	0	10	1	10	0.1
1	2020-06-20	1	25	sm	24	8	1	1	9	0.9	10	0.888889
2	2020-06-20	1	25	sm	24	9	0	1	9	0.9	10	1
3	2020-06-20	1	25	sm	24	9	0	1	9	0.9	10	1
4	2020-06-20	1	25	sm	24	10	0	0	10	1	10	1
5	2020-06-20	1	25	sm	24	9	1	0	10	1	10	0.9
1	2020-06-20	1	25	wm	24	8	0	2	8	0.8	10	1
2	2020-06-20	1	25	wm	24	9	1	0	10	1	10	0.9
3	2020-06-20	1	25	wm	24	7	1	2	8	0.8	10	0.875
4	2020-06-20	1	25	wm	24	7	1	2	8	0.8	10	0.875
5	2020-06-20	1	25	wm	24	2	0	0	10	1	10	1
6	2020-06-26	2	25	sm	24	8	2	0	10	1	10	0.8
7	2020-06-26	2	25	sm	24	10	0	0	10	1	10	1
8	2020-06-26	2	25	sm	24	8	0	0	8	1	8	1
9	2020-06-26	2	25	sm	24	7	2	2	7	0.777778	9	0.777778
10	2020-06-26	2	25	sm	24	8	0	0	8	1	8	1
6	2020-06-26	2	25	wm	24	7	3	3	7	0.7	10	0.7
7	2020-06-26	2	25	wm	24	9	1	1	9	0.9	10	0.9
8	2020-06-26	2	25	wm	24	10	0	0	10	1	10	1
9	2020-06-26	2	25	wm	24	9	2	2	9	0.818182	11	0.818182
10	2020-06-26	2	25	wm	24	8	2	2	8	0.8	10	0.8
11	2020-07-04	3	25	sm	24	9	1	0	10	1	10	0.9
12	2020-07-04	3	25	sm	24	10	0	0	10	1	10	1
13	2020-07-04	3	25	sm	24	7	2	0	9	1	9	0.777778
14	2020-07-04	3	25	sm	24	10	0	0	10	1	10	1
15	2020-07-04	3	25	sm	24	8	0	1	8	0.888889	9	1
11	2020-07-04	3	25	wm	24	9	1	0	10	1	10	0.9
12	2020-07-04	3	25	wm	24	8	1	1	9	0.9	10	0.888889
13	2020-07-04	3	25	wm	24	5	4	1	9	0.9	10	0.555556
14	2020-07-04	3	25	wm	24	11	0	0	11	1	11	1

## Sheet: Sheet2
flyID	cup number	rep	temp	morphotype	activity score	date
1	1	1	5	sm	3	2019-06-20
2	1	1	5	sm	2	2019-06-20
3	1	1	5	sm	2	2019-06-20
4	1	1	5	sm	1	2019-06-20
5	1	1	5	sm	4	2019-06-20
6	2	1	5	sm	1	2019-06-20
7	2	1	5	sm	1	2019-06-20
8	2	1	5	sm	3	2019-06-20
9	2	1	5	sm	3	2019-06-20
10	2	1	5	sm	3	2019-06-20
11	3	1	5	sm	2	2019-06-20
12	3	1	5	sm	2	2019-06-20
13	3	1	5	sm	2	2019-06-20
14	3	1	5	sm	1	2019-06-20
15	3	1	5	sm	1	2019-06-20
16	4	1	5	sm	1	2019-06-20
17	4	1	5	sm	2	2019-06-20
18	4	1	5	sm	2	2019-06-20
19	4	1	5	sm	2	2019-06-20
20	4	1	5	sm	1	2019-06-20
21	5	1	5	sm	1	2019-06-20
22	5	1	5	sm	1	2019-06-20
23	5	1	5	sm	1	2019-06-20
24	5	1	5	sm	1	2019-06-20
25	5	1	5	sm	2	2019-06-20
26	1	1	5	sm	2	2019-06-20
27	1	1	5	sm	2	2019-06-20
28	1	1	5	sm	2	2019-06-20
29	1	1	5	wm	3	2019-06-20
30	1	1	5	wm	3	2019-06-20
31	2	1	5	wm	3	2019-06-20
32	2	1	5	wm	3	2019-06-20
33	2	1	5	wm	3	2019-06-20
34	2	1	5	wm	3	2019-06-20
35	2	1	5	wm	3	2019-06-20
36	3	1	5	wm	3	2019-06-20
37	3	1	5	wm	3	2019-06-20
38	3	1	5	wm	3	2019-06-20
39	3	1	5	wm	3	2019-06-20
40	3	1	5	wm	3	2019-06-20
41	4	1	5	wm	3	2019-06-20
42	4	1	5	wm	3	2019-06-20
43	4	1	5	wm	2	2019-06-20
44	4	1	5	wm	2	2019-06-20
45	4	1	5	wm	3	2019-06-20
46	5	1	5	wm	3	2019-06-20
47	5	1	5	wm	2	2019-06-20
48	5	1	5	wm	2	2019-06-20
49	5	1	5	wm	2	2019-06-20
50	5	1	5	wm	2	2019-06-20
51	1	1	5	wm	2	2019-06-20
52	1	1	5	wm	3	2019-06-20
53	1	1	5	wm	3	2019-06-20
54	1	1	5	wm	3	2019-06-20
55	1	1	5	wm	2	2019-06-20
56	2	1	5	wm	2	2019-06-20
57	2	1	5	wm	2	2019-06-20
58	2	2	5	sm	1	2019-06-26
59	2	2	5	sm	1	2019-06-26
60	2	2	5	sm	1	2019-06-26
61	3	2	5	sm	1	2019-06-26
62	3	2	5	sm	2	2019-06-26
63	3	2	5	sm	2	2019-06-26
64	3	2	5	sm	1	2019-06-26
65	3	2	5	sm	1	2019-06-26
66	4	2	5	sm	1	2019-06-26
67	4	2	5	sm	1	2019-06-26
68	4	2	5	sm	1	2019-06-26
69	4	2	5	sm	1	2019-06-26
70	4	2	5	sm	2	2019-06-26
71	5	2	5	sm	2	2019-06-26
72	5	2	5	sm	2	2019-06-26
73	5	2	5	sm	2	2019-06-26
74	5	2	5	sm	2	2019-06-26
75	5	2	5	sm	2	2019-06-26
76	1	2	5	sm	2	2019-06-26
77	1	2	5	sm	1	2019-06-26
78	1	2	5	sm	1	2019-06-26
79	1	2	5	sm	1	2019-06-26
80	1	2	5	sm	1	2019-06-26
81	2	2	5	sm	1	2019-06-26
82	2	2	5	sm	1	2019-06-26
83	2	2	5	sm	2	2019-06-26
84	2	2	5	sm	2	2019-06-26
85	2	2	5	sm	1	2019-06-26
86	3	2	5	sm	1	2019-06-26
87	3	2	5	sm	1	2019-06-26
88	3	2	5	wm	2	2019-06-26
89	3	2	5	wm	2	2019-06-26
90	3	2	5	wm	1	2019-06-26
91	4	2	5	wm	1	2019-06-26
92	4	2	5	wm	1	2019-06-26
93	4	2	5	wm	1	2019-06-26
94	4	2	5	wm	2	2019-06-26
95	4	2	5	wm	1	2019-06-26
96	5	2	5	wm	1	2019-06-26
97	5	2	5	wm	1	2019-06-26
98	5	2	5	wm	2	2019-06-26
99	5	2	5	wm	1	2019-06-26
100	5	2	5	wm	2	2019-06-26
101	1	2	5	wm	1	2019-06-26
102	1	2	5	wm	1	2019-06-26
103	1	2	5	wm	1	2019-06-26
104	1	2	5	wm	1	2019-06-26
105	1	2	5	wm	1	2019-06-26
106	2	2	5	wm	1	2019-06-26
107	2	2	5	wm	1	2019-06-26
108	2	2	5	wm	1	2019-06-26
109	2	2	5	wm	1	2019-06-26
110	2	2	5	wm	1	2019-06-26
111	3	2	5	wm	1	2019-06-26
112	3	2	5	wm	2	2019-06-26
113	3	2	5	wm	1	2019-06-26
114	3	2	5	wm	1	2019-06-26
115	3	2	5	wm	1	2019-06-26
116	4	2	5	wm	1	2019-06-26
117	4	2	5	wm	1	2019-06-26
118	4	3	5	sm	1	2019-07-04
119	4	3	5	sm	1	2019-07-04
120	4	3	5	sm	1	2019-07-04
121	5	3	5	sm	1	2019-07-04
122	5	3	5	sm	1	2019-07-04
123	5	3	5	sm	1	2019-07-04
124	5	3	5	sm	1	2019-07-04
125	5	3	5	sm	1	2019-07-04
126	1	3	5	sm	1	2019-07-04
127	1	3	5	sm	1	2019-07-04
128	1	3	5	sm	1	2019-07-04
129	1	3	5	sm	1	2019-07-04
130	1	3	5	sm	1	2019-07-04
131	2	3	5	sm	1	2019-07-04
132	2	3	5	sm	1	2019-07-04
133	2	3	5	sm	1	2019-07-04
134	2	3	5	sm	1	2019-07-04
135	2	3	5	sm	1	2019-07-04
136	3	3	5	sm	1	2019-07-04
137	3	3	5	sm	1	2019-07-04
138	3	3	5	sm	1	2019-07-04
139	3	3	5	sm	1	2019-07-04
140	3	3	5	sm	1	2019-07-04
141	4	3	5	sm	1	2019-07-04
142	4	3	5	sm	1	2019-07-04
143	4	3	5	wm	2	2019-07-04
144	4	3	5	wm	2	2019-07-04
145	4	3	5	wm	2	2019-07-04
146	5	3	5	wm	1	2019-07-04
147	5	3	5	wm	1	2019-07-04
148	5	3	5	wm	1	2019-07-04
149	5	3	5	wm	2	2019-07-04
150	5	3	5	wm	2	2019-07-04
151	1	3	5	wm	1	2019-07-04
152	1	3	5	wm	2	2019-07-04
153	1	3	5	wm	2	2019-07-04
154	1	3	5	wm	1	2019-07-04
155	1	3	5	wm	1	2019-07-04
156	2	3	5	wm	1	2019-07-04
157	2	3	5	wm	1	2019-07-04
158	2	3	5	wm	1	2019-07-04
159	2	3	5	wm	1	2019-07-04
160	2	3	5	wm	1	2019-07-04
161	3	3	5	wm	1	2019-07-04
162	3	3	5	wm	1	2019-07-04
163	3	3	5	wm	1	2019-07-04
164	3	3	5	wm	1	2019-07-04
165	3	3	5	wm	1	2019-07-04
166	4	3	5	wm	1	2019-07-04
167	4	3	5	wm	1	2019-07-04
168	4	1	10	sm	3	2019-06-20
169	4	1	10	sm	3	2019-06-20
170	4	1	10	sm	3	2019-06-20
171	5	1	10	sm	3	2019-06-20
172	5	1	10	sm	3	2019-06-20
173	5	1	10	sm	3	2019-06-20
174	5	1	10	sm	3	2019-06-20
175	5	1	10	sm	3	2019-06-20
176	1	1	10	sm	3	2019-06-20
177	1	1	10	sm	2	2019-06-20
178	1	1	10	sm	2	2019-06-20
179	1	1	10	sm	3	2019-06-20
180	1	1	10	sm	3	2019-06-20
181	2	1	10	sm	2	2019-06-20
182	2	1	10	sm	2	2019-06-20
183	2	1	10	sm	2	2019-06-20
184	2	1	10	sm	2	2019-06-20
185	2	1	10	sm	3	2019-06-20
186	3	1	10	sm	3	2019-06-20
187	3	1	10	sm	2	2019-06-20
188	3	1	10	sm	2	2019-06-20
189	3	1	10	sm	2	2019-06-20
190	3	1	10	sm	2	2019-06-20
191	4	1	10	sm	2	2019-06-20
192	4	1	10	sm	2	2019-06-20
193	4	1	10	sm	2	2019-06-20
194	4	1	10	sm	2	2019-06-20
195	4	1	10	sm	2	2019-06-20
196	5	1	10	sm	2	2019-06-20
197	5	1	10	sm	2	2019-06-20
198	5	1	10	wm	2	2019-06-20
199	5	1	10	wm	2	2019-06-20
200	5	1	10	wm	2	2019-06-20
201	1	1	10	wm	2	2019-06-20
202	1	1	10	wm	2	2019-06-20
203	1	1	10	wm	2	2019-06-20
204	1	1	10	wm	3	2019-06-20
205	1	1	10	wm	2	2019-06-20
206	2	1	10	wm	2	2019-06-20
207	2	1	10	wm	2	2019-06-20
208	2	1	10	wm	2	2019-06-20
209	2	1	10	wm	2	2019-06-20
210	2	1	10	wm	3	2019-06-20
211	3	1	10	wm	3	2019-06-20
212	3	1	10	wm	3	2019-06-20
213	3	1	10	wm	2	2019-06-20
214	3	1	10	wm	2	2019-06-20
215	3	1	10	wm	4	2019-06-20
216	4	1	10	wm	3	2019-06-20
217	4	1	10	wm	3	2019-06-20
218	4	1	10	wm	2	2019-06-20
219	4	1	10	wm	2	2019-06-20
220	4	1	10	wm	2	2019-06-20
221	5	1	10	wm	3	2019-06-20
222	5	1	10	wm	3	2019-06-20
223	5	1	10	wm	3	2019-06-20
224	5	1	10	wm	2	2019-06-20
225	5	1	10	wm	2	2019-06-20
226	1	1	10	wm	2	2019-06-20
227	1	1	10	wm	2	2019-06-20
228	1	2	10	sm	3	2019-06-26
229	1	2	10	sm	1	2019-06-26
230	1	2	10	sm	1	2019-06-26
231	2	2	10	sm	1	2019-06-26
232	2	2	10	sm	2	2019-06-26
233	2	2	10	sm	1	2019-06-26
234	2	2	10	sm	2	2019-06-26
235	2	2	10	sm	1	2019-06-26
236	3	2	10	sm	1	2019-06-26
237	3	2	10	sm	1	2019-06-26
238	3	2	10	sm	1	2019-06-26
239	3	2	10	sm	1	2019-06-26
240	3	2	10	sm	1	2019-06-26
241	4	2	10	sm	1	2019-06-26
242	4	2	10	sm	1	2019-06-26
243	4	2	10	sm	1	2019-06-26
244	4	2	10	sm	1	2019-06-26
245	4	2	10	sm	1	2019-06-26
246	5	2	10	sm	1	2019-06-26
247	5	2	10	sm	1	2019-06-26
248	5	2	10	sm	1	2019-06-26
249	5	2	10	sm	1	2019-06-26
250	5	2	10	sm	2	2019-06-26
251	1	2	10	sm	1	2019-06-26
252	1	2	10	sm	1	2019-06-26
253	1	2	10	sm	1	2019-06-26
254	1	2	10	sm	1	2019-06-26
255	1	2	10	sm	1	2019-06-26
256	2	2	10	sm	2	2019-06-26
257	2	2	10	sm	3	2019-06-26
258	2	2	10	wm	2	2019-06-26
259	2	2	10	wm	2	2019-06-26
260	2	2	10	wm	1	2019-06-26
261	3	2	10	wm	1	2019-06-26
262	3	2	10	wm	1	2019-06-26
263	3	2	10	wm	1	2019-06-26
264	3	2	10	wm	2	2019-06-26
265	3	2	10	wm	1	2019-06-26
266	4	2	10	wm	1	2019-06-26
267	4	2	10	wm	1	2019-06-26
268	4	2	10	wm	1	2019-06-26
269	4	2	10	wm	1	2019-06-26
270	4	2	10	wm	2	2019-06-26
271	5	2	10	wm	1	2019-06-26
272	5	2	10	wm	1	2019-06-26
273	5	2	10	wm	1	2019-06-26
274	5	2	10	wm	1	2019-06-26
275	5	2	10	wm	1	2019-06-26
276	1	2	10	wm	1	2019-06-26
277	1	2	10	wm	1	2019-06-26
278	1	2	10	wm	1	2019-06-26
279	1	2	10	wm	1	2019-06-26
280	1	2	10	wm	2	2019-06-26
281	2	2	10	wm	2	2019-06-26
282	2	2	10	wm	2	2019-06-26
283	2	2	10	wm	2	2019-06-26
284	2	2	10	wm	1	2019-06-26
285	2	2	10	wm	1	2019-06-26
286	3	2	10	wm	1	2019-06-26
287	3	2	10	wm	1	2019-06-26
288	3	3	10	sm	2	2019-07-04
289	3	3	10	sm	2	2019-07-04
290	3	3	10	sm	1	2019-07-04
291	4	3	10	sm	1	2019-07-04
292	4	3	10	sm	1	2019-07-04
293	4	3	10	sm	3	2019-07-04
294	4	3	10	sm	1	2019-07-04
295	4	3	10	sm	1	2019-07-04
296	5	3	10	sm	1	2019-07-04
297	5	3	10	sm	2	2019-07-04
298	5	3	10	sm	1	2019-07-04
299	5	3	10	sm	1	2019-07-04
300	5	3	10	sm	1	2019-07-04
301	1	3	10	sm	1	2019-07-04
302	1	3	10	sm	1	2019-07-04
303	1	3	10	sm	1	2019-07-04
304	1	3	10	sm	1	2019-07-04
305	1	3	10	sm	1	2019-07-04
306	2	3	10	sm	1	2019-07-04
307	2	3	10	sm	1	2019-07-04
308	2	3	10	sm	1	2019-07-04
309	2	3	10	sm	1	2019-07-04
310	2	3	10	sm	1	2019-07-04
311	3	3	10	sm	1	2019-07-04
312	3	3	10	sm	1	2019-07-04
313	3	3	10	wm	2	2019-07-04
314	3	3	10	wm	1	2019-07-04
315	3	3	10	wm	1	2019-07-04
316	4	3	10	wm	2	2019-07-04
317	4	3	10	wm	2	2019-07-04
318	4	3	10	wm	1	2019-07-04
319	4	3	10	wm	1	2019-07-04
320	4	3	10	wm	1	2019-07-04
321	5	3	10	wm	1	2019-07-04
322	5	3	10	wm	2	2019-07-04
323	5	3	10	wm	2	2019-07-04
324	5	3	10	wm	1	2019-07-04
325	5	3	10	wm	1	2019-07-04
326	1	3	10	wm	1	2019-07-04
327	1	3	10	wm	2	2019-07-04
328	1	3	10	wm	2	2019-07-04
329	1	3	10	wm	1	2019-07-04
330	1	3	10	wm	1	2019-07-04
331	2	3	10	wm	1	2019-07-04
332	2	3	10	wm	2	2019-07-04
333	2	3	10	wm	2	2019-07-04
334	2	3	10	wm	2	2019-07-04
335	2	3	10	wm	1	2019-07-04
336	3	3	10	wm	1	2019-07-04
337	3	3	10	wm	1	2019-07-04
338	3	1	15	sm	4	2019-06-20
339	3	1	15	sm	4	2019-06-20
340	3	1	15	sm	5	2019-06-20
341	4	1	15	sm	3	2019-06-20
342	4	1	15	sm	3	2019-06-20
343	4	1	15	sm	3	2019-06-20
344	4	1	15	sm	5	2019-06-20
345	4	1	15	sm	4	2019-06-20
346	5	1	15	sm	4	2019-06-20
347	5	1	15	sm	3	2019-06-20
348	5	1	15	sm	3	2019-06-20
349	5	1	15	sm	5	2019-06-20
350	5	1	15	sm	4	2019-06-20
351	1	1	15	sm	3	2019-06-20
352	1	1	15	sm	3	2019-06-20
353	1	1	15	sm	3	2019-06-20
354	1	1	15	sm	3	2019-06-20
355	1	1	15	sm	3	2019-06-20
356	2	1	15	sm	5	2019-06-20
357	2	1	15	sm	4	2019-06-20
358	2	1	15	sm	4	2019-06-20
359	2	1	15	sm	4	2019-06-20
360	2	1	15	sm	4	2019-06-20
361	3	1	15	sm	3	2019-06-20
362	3	1	15	sm	5	2019-06-20
363	3	1	15	sm	3	2019-06-20
364	3	1	15	sm	3	2019-06-20
365	3	1	15	sm	4	2019-06-20
366	4	1	15	sm	4	2019-06-20
367	4	1	15	sm	4	2019-06-20
368	4	1	15	wm	5	2019-06-20
369	4	1	15	wm	5	2019-06-20
370	4	1	15	wm	4	2019-06-20
371	5	1	15	wm	4	2019-06-20
372	5	1	15	wm	3	2019-06-20
373	5	1	15	wm	3	2019-06-20
374	5	1	15	wm	3	2019-06-20
375	5	1	15	wm	3	2019-06-20
376	1	1	15	wm	3	2019-06-20
377	1	1	15	wm	5	2019-06-20
378	1	1	15	wm	5	2019-06-20
379	1	1	15	wm	3	2019-06-20
380	1	1	15	wm	5	2019-06-20
381	2	1	15	wm	3	2019-06-20
382	2	1	15	wm	3	2019-06-20
383	2	1	15	wm	4	2019-06-20
384	2	1	15	wm	4	2019-06-20
385	2	1	15	wm	4	2019-06-20
386	3	1	15	wm	5	2019-06-20
387	3	1	15	wm	4	2019-06-20
388	3	1	15	wm	4	2019-06-20
389	3	1	15	wm	3	2019-06-20
390	3	1	15	wm	3	2019-06-20
391	4	1	15	wm	3	2019-06-20
392	4	1	15	wm	5	2019-06-20
393	4	1	15	wm	4	2019-06-20
394	4	1	15	wm	4	2019-06-20
395	4	1	15	wm	3	2019-06-20
396	5	1	15	wm	3	2019-06-20
397	5	1	15	wm	3	2019-06-20
398	5	2	15	sm	3	2019-06-26
399	5	2	15	sm	3	2019-06-26
400	5	2	15	sm	3	2019-06-26
401	1	2	15	sm	1	2019-06-26
402	1	2	15	sm	1	2019-06-26
403	1	2	15	sm	1	2019-06-26
404	1	2	15	sm	3	2019-06-26
405	1	2	15	sm	3	2019-06-26
406	2	2	15	sm	3	2019-06-26
407	2	2	15	sm	2	2019-06-26
408	2	2	15	sm	2	2019-06-26
409	2	2	15	sm	1	2019-06-26
410	2	2	15	sm	3	2019-06-26
411	3	2	15	sm	3	2019-06-26
412	3	2	15	sm	3	2019-06-26
413	3	2	15	sm	2	2019-06-26
414	3	2	15	sm	1	2019-06-26
415	3	2	15	sm	3	2019-06-26
416	4	2	15	sm	3	2019-06-26
417	4	2	15	sm	3	2019-06-26
418	4	2	15	sm	1	2019-06-26
419	4	2	15	sm	1	2019-06-26
420	4	2	15	sm	2	2019-06-26
421	5	2	15	sm	2	2019-06-26
422	5	2	15	sm	2	2019-06-26
423	5	2	15	sm	2	2019-06-26
424	5	2	15	sm	3	2019-06-26
425	5	2	15	sm	3	2019-06-26
426	1	2	15	sm	3	2019-06-26
427	1	2	15	sm	3	2019-06-26
428	1	2	15	wm	3	2019-06-26
429	1	2	15	wm	3	2019-06-26
430	1	2	15	wm	2	2019-06-26
431	2	2	15	wm	2	2019-06-26
432	2	2	15	wm	2	2019-06-26
433	2	2	15	wm	2	2019-06-26
434	2	2	15	wm	3	2019-06-26
435	2	2	15	wm	3	2019-06-26
436	3	2	15	wm	2	2019-06-26
437	3	2	15	wm	2	2019-06-26
438	3	2	15	wm	2	2019-06-26
439	3	2	15	wm	2	2019-06-26
440	3	2	15	wm	3	2019-06-26
441	4	2	15	wm	3	2019-06-26
442	4	2	15	wm	2	2019-06-26
443	4	2	15	wm	2	2019-06-26
444	4	2	15	wm	1	2019-06-26
445	4	2	15	wm	1	2019-06-26
446	5	2	15	wm	2	2019-06-26
447	5	2	15	wm	2	2019-06-26
448	5	2	15	wm	2	2019-06-26
449	5	2	15	wm	1	2019-06-26
450	5	2	15	wm	1	2019-06-26
451	1	2	15	wm	3	2019-06-26
452	1	2	15	wm	3	2019-06-26
453	1	2	15	wm	1	2019-06-26
454	1	2	15	wm	1	2019-06-26
455	1	2	15	wm	1	2019-06-26
456	2	2	15	wm	1	2019-06-26
457	2	2	15	wm	2	2019-06-26
458	2	3	15	sm	3	2019-07-04
459	2	3	15	sm	3	2019-07-04
460	2	3	15	sm	2	2019-07-04
461	3	3	15	sm	2	2019-07-04
462	3	3	15	sm	1	2019-07-04
463	3	3	15	sm	3	2019-07-04
464	3	3	15	sm	3	2019-07-04
465	3	3	15	sm	1	2019-07-04
466	4	3	15	sm	1	2019-07-04
467	4	3	15	sm	3	2019-07-04
468	4	3	15	sm	3	2019-07-04
469	4	3	15	sm	1	2019-07-04
470	4	3	15	sm	2	2019-07-04
471	5	3	15	sm	2	2019-07-04
472	5	3	15	sm	3	2019-07-04
473	5	3	15	sm	3	2019-07-04
474	5	3	15	sm	3	2019-07-04
475	5	3	15	sm	3	2019-07-04
476	1	3	15	sm	2	2019-07-04
477	1	3	15	sm	3	2019-07-04
478	1	3	15	sm	3	2019-07-04
479	1	3	15	sm	2	2019-07-04
480	1	3	15	sm	2	2019-07-04
481	2	3	15	sm	1	2019-07-04
482	2	3	15	sm	1	2019-07-04
483	2	3	15	wm	3	2019-07-04
484	2	3	15	wm	2	2019-07-04
485	2	3	15	wm	1	2019-07-04
486	3	3	15	wm	1	2019-07-04
487	3	3	15	wm	1	2019-07-04
488	3	3	15	wm	3	2019-07-04
489	3	3	15	wm	2	2019-07-04
490	3	3	15	wm	2	2019-07-04
491	4	3	15	wm	1	2019-07-04
492	4	3	15	wm	1	2019-07-04
493	4	3	15	wm	3	2019-07-04
494	4	3	15	wm	2	2019-07-04
495	4	3	15	wm	1	2019-07-04
496	5	3	15	wm	1	2019-07-04
497	5	3	15	wm	1	2019-07-04
498	5	3	15	wm	3	2019-07-04
499	5	3	15	wm	1	2019-07-04
500	5	3	15	wm	1	2019-07-04
501	1	3	15	wm	1	2019-07-04
502	1	3	15	wm	1	2019-07-04
503	1	3	15	wm	3	2019-07-04
504	1	3	15	wm	3	2019-07-04
505	1	3	15	wm	2	2019-07-04
506	2	3	15	wm	2	2019-07-04
507	2	3	15	wm	2	2019-07-04
508	2	1	25	sm	3	2019-06-20
509	2	1	25	sm	3	2019-06-20
510	2	1	25	sm	3	2019-06-20
511	3	1	25	sm	3	2019-06-20
512	3	1	25	sm	3	2019-06-20
513	3	1	25	sm	4	2019-06-20
514	3	1	25	sm	3	2019-06-20
515	3	1	25	sm	3	2019-06-20
516	4	1	25	sm	3	2019-06-20
517	4	1	25	sm	3	2019-06-20
518	4	1	25	sm	3	2019-06-20
519	4	1	25	sm	3	2019-06-20
520	4	1	25	sm	1	2019-06-20
521	5	1	25	sm	3	2019-06-20
522	5	1	25	sm	3	2019-06-20
523	5	1	25	sm	3	2019-06-20
524	5	1	25	sm	3	2019-06-20
525	5	1	25	sm	3	2019-06-20
526	1	1	25	sm	3	2019-06-20
527	1	1	25	sm	3	2019-06-20
528	1	1	25	sm	3	2019-06-20
529	1	1	25	sm	3	2019-06-20
530	1	1	25	sm	3	2019-06-20
531	2	1	25	sm	3	2019-06-20
532	2	1	25	sm	3	2019-06-20
533	2	1	25	sm	3	2019-06-20
534	2	1	25	sm	3	2019-06-20
535	2	1	25	sm	3	2019-06-20
536	3	1	25	sm	3	2019-06-20
537	3	1	25	sm	3	2019-06-20
538	3	1	25	wm	5	2019-06-20
539	3	1	25	wm	3	2019-06-20
540	3	1	25	wm	3	2019-06-20
541	4	1	25	wm	3	2019-06-20
542	4	1	25	wm	3	2019-06-20
543	4	1	25	wm	3	2019-06-20
544	4	1	25	wm	5	2019-06-20
545	4	1	25	wm	3	2019-06-20
546	5	1	25	wm	3	2019-06-20
547	5	1	25	wm	3	2019-06-20
548	5	1	25	wm	3	2019-06-20
549	5	1	25	wm	3	2019-06-20
550	5	1	25	wm	4	2019-06-20
551	1	1	25	wm	3	2019-06-20
552	1	1	25	wm	3	2019-06-20
553	1	1	25	wm	3	2019-06-20
554	1	1	25	wm	3	2019-06-20
555	1	1	25	wm	3	2019-06-20
556	2	1	25	wm	4	2019-06-20
557	2	1	25	wm	3	2019-06-20
558	2	1	25	wm	3	2019-06-20
559	2	1	25	wm	3	2019-06-20
560	2	1	25	wm	3	2019-06-20
561	3	1	25	wm	3	2019-06-20
562	3	1	25	wm	3	2019-06-20
563	3	1	25	wm	3	2019-06-20
564	3	1	25	wm	3	2019-06-20
565	3	1	25	wm	3	2019-06-20
566	4	1	25	wm	3	2019-06-20
567	4	1	25	wm	3	2019-06-20
568	4	2	25	sm	2	2019-06-26
569	4	2	25	sm	2	2019-06-26
570	4	2	25	sm	1	2019-06-26
571	5	2	25	sm	1	2019-06-26
572	5	2	25	sm	1	2019-06-26
573	5	2	25	sm	1	2019-06-26
574	5	2	25	sm	1	2019-06-26
575	5	2	25	sm	1	2019-06-26
576	1	2	25	sm	1	2019-06-26
577	1	2	25	sm	1	2019-06-26
578	1	2	25	sm	1	2019-06-26
579	1	2	25	sm	1	2019-06-26
580	1	2	25	sm	1	2019-06-26
581	2	2	25	sm	1	2019-06-26
582	2	2	25	sm	1	2019-06-26
583	2	2	25	sm	1	2019-06-26
584	2	2	25	sm	1	2019-06-26
585	2	2	25	sm	1	2019-06-26
586	3	2	25	sm	1	2019-06-26
587	3	2	25	sm	1	2019-06-26
588	3	2	25	sm	1	2019-06-26
589	3	2	25	sm	1	2019-06-26
590	3	2	25	sm	1	2019-06-26
591	4	2	25	sm	1	2019-06-26
592	4	2	25	sm	1	2019-06-26
593	4	2	25	sm	1	2019-06-26
594	4	2	25	sm	1	2019-06-26
595	4	2	25	sm	1	2019-06-26
596	5	2	25	sm	1	2019-06-26
597	5	2	25	sm	1	2019-06-26
598	5	2	25	wm	2	2019-06-26
599	5	2	25	wm	2	2019-06-26
600	5	2	25	wm	1	2019-06-26
601	1	2	25	wm	1	2019-06-26
602	1	2	25	wm	1	2019-06-26
603	1	2	25	wm	1	2019-06-26
604	1	2	25	wm	1	2019-06-26
605	1	2	25	wm	1	2019-06-26
606	2	2	25	wm	1	2019-06-26
607	2	2	25	wm	1	2019-06-26
608	2	2	25	wm	1	2019-06-26
609	2	2	25	wm	1	2019-06-26
610	2	2	25	wm	1	2019-06-26
611	3	2	25	wm	1	2019-06-26
612	3	2	25	wm	1	2019-06-26
613	3	2	25	wm	1	2019-06-26
614	3	2	25	wm	1	2019-06-26
615	3	2	25	wm	1	2019-06-26
616	4	2	25	wm	2	2019-06-26
617	4	2	25	wm	1	2019-06-26
618	4	2	25	wm	1	2019-06-26
619	4	2	25	wm	1	2019-06-26
620	4	2	25	wm	1	2019-06-26
621	5	2	25	wm	1	2019-06-26
622	5	2	25	wm	3	2019-06-26
623	5	2	25	wm	2	2019-06-26
624	5	2	25	wm	2	2019-06-26
625	5	2	25	wm	1	2019-06-26
626	1	2	25	wm	1	2019-06-26
627	1	2	25	wm	1	2019-06-26
628	1	3	25	sm	1	2019-07-04
629	1	3	25	sm	1	2019-07-04
630	1	3	25	sm	1	2019-07-04
631	2	3	25	sm	1	2019-07-04
632	2	3	25	sm	1	2019-07-04
633	2	3	25	sm	1	2019-07-04
634	2	3	25	sm	1	2019-07-04
635	2	3	25	sm	1	2019-07-04
636	3	3	25	sm	1	2019-07-04
637	3	3	25	sm	1	2019-07-04
638	3	3	25	sm	1	2019-07-04
639	3	3	25	sm	1	2019-07-04
640	3	3	25	sm	1	2019-07-04
641	4	3	25	sm	1	2019-07-04
642	4	3	25	sm	1	2019-07-04
643	4	3	25	sm	1	2019-07-04
644	4	3	25	sm	1	2019-07-04
645	4	3	25	sm	1	2019-07-04
646	5	3	25	sm	1	2019-07-04
647	5	3	25	sm	1	2019-07-04
648	5	3	25	sm	1	2019-07-04
649	5	3	25	sm	1	2019-07-04
650	5	3	25	sm	1	2019-07-04
651	1	3	25	sm	1	2019-07-04
652	1	3	25	sm	1	2019-07-04
653	1	3	25	wm	1	2019-07-04
654	1	3	25	wm	1	2019-07-04
655	1	3	25	wm	1	2019-07-04
656	2	3	25	wm	1	2019-07-04
657	2	3	25	wm	1	2019-07-04
658	2	3	25	wm	1	2019-07-04
659	2	3	25	wm	1	2019-07-04
660	2	3	25	wm	1	2019-07-04
661	3	3	25	wm	1	2019-07-04
662	3	3	25	wm	1	2019-07-04
663	3	3	25	wm	1	2019-07-04
664	3	3	25	wm	1	2019-07-04
665	3	3	25	wm	1	2019-07-04
666	4	3	25	wm	1	2019-07-04
667	4	3	25	wm	1	2019-07-04
668	4	3	25	wm	1	2019-07-04
669	4	3	25	wm	1	2019-07-04
670	4	3	25	wm	1	2019-07-04
671	5	3	25	wm	1	2019-07-04
672	5	3	25	wm	1	2019-07-04
673	5	3	25	wm	1	2019-07-04
674	5	3	25	wm	1	2019-07-04
675	5	3	25	wm	1	2019-07-04
676	1	3	25	wm	1	2019-07-04
677	1	3	25	wm	1	2019-07-04
678	1	3	0	sm	0	2019-07-04
679	1	3	0	sm	0	2019-07-04
680	1	3	0	sm	0	2019-07-04
681	2	3	0	sm	0	2019-07-04
682	2	3	0	sm	0	2019-07-04
683	2	3	0	sm	0	2019-07-04
684	2	3	0	sm	0	2019-07-04
685	2	3	0	sm	0	2019-07-04
686	3	3	0	sm	0	2019-07-04
687	3	3	0	sm	0	2019-07-04
688	3	3	0	sm	0	2019-07-04
689	3	3	0	sm	0	2019-07-04
690	3	3	0	sm	0	2019-07-04
691	4	3	0	sm	0	2019-07-04
692	4	3	0	sm	0	2019-07-04
693	4	3	0	sm	0	2019-07-04
694	4	3	0	sm	0	2019-07-04
695	4	3	0	sm	0	2019-07-04
696	5	3	0	sm	0	2019-07-04
697	5	3	0	sm	0	2019-07-04
698	5	3	0	sm	0	2019-07-04
699	5	3	0	sm	0	2019-07-04
700	5	3	0	sm	0	2019-07-04
701	1	3	0	sm	0	2019-07-04
702	1	3	0	sm	0	2019-07-04
703	1	3	0	wm	1	2019-07-04
704	1	3	0	wm	1	2019-07-04
705	1	3	0	wm	1	2019-07-04
706	2	3	0	wm	1	2019-07-04
707	2	3	0	wm	1	2019-07-04
708	2	3	0	wm	1	2019-07-04
709	2	3	0	wm	1	2019-07-04
710	2	3	0	wm	1	2019-07-04
711	3	3	0	wm	1	2019-07-04
712	3	3	0	wm	1	2019-07-04
713	3	3	0	wm	1	2019-07-04
714	3	3	0	wm	1	2019-07-04
715	3	3	0	wm	1	2019-07-04
716	4	3	0	wm	0	2019-07-04
717	4	3	0	wm	1	2019-07-04
718	4	3	0	wm	1	2019-07-04
719	4	3	0	wm	1	2019-07-04
720	4	3	0	wm	1	2019-07-04
721	5	3	0	wm	0	2019-07-04
722	5	3	0	wm	1	2019-07-04
723	5	3	0	wm	1	2019-07-04
724	5	3	0	wm	1	2019-07-04
725	5	3	0	wm	1	2019-07-04
