# Supplementary material for: Molecular and behavioral studies reveal differences in olfaction between winter and summer morphs of Drosophila suzukii
Source: PeerJ. 2022 Sep 16;10:e13825. doi: 10.7717/peerj.13825 (PMC9484457; doi:10.7717/peerj.13825)
Supplement: Supplemental Information 6 [file peerj-10-13825-s006.xlsx]

## Sheet: Obp44a
Gene	Sample	CT	CT Mean	Gene	Sample	CT	CT Mean	dCT	ddCT
Obp44a	Winter 1	21.4787		TBP	Winter 1	30.1791						WINTER						AVE	STD DEV	STERR
Obp44a	Winter 1	17.81		TBP	Winter 1	29.6386						2.74373	-3.03893	3.33007	2.67364	2.59707	2.24632	1.75865	2.37632	0.97013
Obp44a	Winter 1	16.5726	18.6204	TBP	Winter 1	29.2194	29.679	11.0586	2.74373	6.698
Obp44a	Summer 1	19.4852		TBP	Summer 1	27.8091						SUMMER
Obp44a	Summer 1	18.841		TBP	Summer 1	27.6983						0.164443	0.389091	-1.17377	-2.86188	-1.23374	-0.32831	-0.840695	1.19464	0.48771
Obp44a	Summer 1	19.3962	19.2408	TBP	Summer 1	27.653	27.7201	8.47933	0.164443	1.12073
Obp44a	Winter 2	Undetermined		TBP	Winter 2	30.9171
Obp44a	Winter 2	33.8457		TBP	Winter 2	30.4022
Obp44a	Winter 2	38.2277	36.0367	TBP	Winter 2	30.9629	30.7607	-5.27595	-3.03893	0.121672		Obp44a							AVE	STD DEV	STERR
Obp44a	Summer 2	19.006		TBP	Summer 2	27.4172						WINTER	6.698	0.121672	10.0566	6.38039	6.05058	4.74472	5.67532	3.2431	1.32399
Obp44a	Summer 2	18.4533		TBP	Summer 2	27.5927						SUMMER	1.12073	1.30957	0.443261	0.137559	0.425213	0.796469	0.705467	0.450662	0.183982
Obp44a	Summer 2	19.2395	18.8996	TBP	Summer 2	27.8009	27.6036	8.70398	0.389091	1.30957
Obp44a	Winter 3	16.82		TBP	Winter 3	27.7076
Obp44a	Winter 3	16.1611		TBP	Winter 3	27.894
Obp44a	Winter 3	15.791	16.2574	TBP	Winter 3	28.1054	27.9023	11.645	3.33007	10.0566
Obp44a	Summer 3	20.5685		TBP	Summer 3	26.9414
Obp44a	Summer 3	20.1261		TBP	Summer 3	26.7611
Obp44a	Summer 3	18.2289	19.6412	TBP	Summer 3	26.6444	26.7823	7.14111	-1.17377	0.443261
Obp44a	Winter 4	18.7477		TBP	Winter 4	29.3685						winter	summer
Obp44a	Winter 4	18.3039		TBP	Winter 4	29.6129						11.0586	8.47933
Obp44a	Winter 4	18.5131	18.5216	TBP	Winter 4	29.5489	29.5101	10.9885	2.67364	6.38039		-5.27595	8.70398
Obp44a	Summer 4	23.4111		TBP	Summer 4	29.2565						11.645	7.14111
Obp44a	Summer 4	25.8328		TBP	Summer 4	27.3456						10.9885	5.453
Obp44a	Summer 4	20.3189	23.1876	TBP	Summer 4	29.3197	28.6406	5.453	-2.86188	0.137559		10.912	7.08114
Obp44a	Winter 5	16.4867		TBP	Winter 5	26.9025						10.5612	7.98658
Obp44a	Winter 5	16.4173		TBP	Winter 5	27.1601						8.31489	7.47419
Obp44a	Winter 5	15.1948	16.0329	TBP	Winter 5	26.772	26.9449	10.912	2.59707	6.05058
Obp44a	Summer 5	21.7198		TBP	Summer 5	28.7006
Obp44a	Summer 5	21.8463		TBP	Summer 5	27.9695
Obp44a	Summer 5	20.3039	21.29	TBP	Summer 5	28.4433	28.3711	7.08114	-1.23374	0.425213
Obp44a	Winter 6	15.8835		TBP	Winter 6	26.6661
Obp44a	Winter 6	15.7369		TBP	Winter 6	26.5212
Obp44a	Winter 6	16.2133	15.9446	TBP	Winter 6	26.3301	26.5058	10.5612	2.24632	4.74472
Obp44a	Summer 6	19.5927		TBP	Summer 6	27.6712
Obp44a	Summer 6	19.8151		TBP	Summer 6	27.5683
Obp44a	Summer 6	19.4013	19.6031	TBP	Summer 6	27.5294	27.5896	7.98658	-0.32831	0.796469
Obp44a	Winter 1	18.8729		TBP	Winter 1	30.1791
Obp44a	Winter 1	13.8832		TBP	Winter 1	29.6386
Obp44a	Winter 1	17.3013	16.6858	TBP	Winter 1	29.2194	29.679	12.9932
Obp4vy4a	Summer 1	19.1769		TBP	Summer 1	27.8091
Obp44a	Summer 1	19.3479		TBP	Summer 1	27.6983
Obp44a	Summer 1	19.1387	19.2212	TBP	Summer 1	27.653	27.7201	8.49891
Obp44a	Winter 2	20.504		TBP	Winter 2	30.9171
Obp44a	Winter 2	20.7504		TBP	Winter 2	30.4022
Obp44a	Winter 2	20.4954	20.5832	TBP	Winter 2	30.9629	30.7607	10.1775
Obp44a	Summer 2	19.2809		TBP	Summer 2	27.4172
Obp44a	Summer 2	19.3081		TBP	Summer 2	27.5927
Obp44a	Summer 2	20.7262	19.7717	TBP	Summer 2	27.8009	27.6036	7.83184
Obp44a	Winter 3	16.3724		TBP	Winter 3	27.7076
Obp44a	Winter 3	16.3518		TBP	Winter 3	27.894
Obp44a	Winter 3	16.5279	16.4173	TBP	Winter 3	28.1054	27.9023	11.485
Obp44a	Summer 3	18.5344		TBP	Summer 3	26.9414
Obp44a	Summer 3	18.734		TBP	Summer 3	26.7611
Obp44a	Summer 3	18.7866	18.685	TBP	Summer 3	26.6444	26.7823	8.09727
Obp44a	Winter 4	19.4124		TBP	Winter 4	29.3685
Obp44a	Winter 4	19.5466		TBP	Winter 4	29.6129
Obp44a	Winter 4	18.9914	19.3168	TBP	Winter 4	29.5489	29.5101	10.1933
Obp44a	Winter 5	17.1227		TBP	Winter 5	26.9025
Obp44a	Winter 5	17.3372		TBP	Winter 5	27.1601
Obp44a	Winter 5	17.109	17.1896	TBP	Winter 5	26.772	26.9449	9.75524
Obp44a	Summer 5	21.235		TBP	Summer 5	28.7006
Obp44a	Summer 5	20.924		TBP	Summer 5	27.9695
Obp44a	Summer 5	21.1529	21.104	TBP	Summer 5	28.4433	28.3711	7.26713
Obp44a	Winter 6	16.2562		TBP	Winter 6	26.6661
Obp44a	Winter 6	16.3956		TBP	Winter 6	26.5212
Obp44a	Winter 6	16.4415	16.3644	TBP	Winter 6	26.3301	26.5058	10.1414
Obp44a	Summer 6	17.4727		TBP	Summer 6	27.6712
Obp44a	Summer 6	18.5814		TBP	Summer 6	27.5683
Obp44a	Summer 6	18.5558	18.2033	TBP	Summer 6	27.5294	27.5896	9.38633

## Sheet: EFF
Gene	Sample	CT	CT mean	Gene	Sample	CT	CT mean	dCT
Eff	Winter 1	22.3		TBP	Winter 1	30.1791						WINTER						AVE	STD DEV	STERR
Eff	Winter 1	22.801		TBP	Winter 1	29.6386						1.65024	-1.07324	0.213073	0.088114	-0.426444	-0.45174	2.96059e-16	0.928894	0.379219
Eff	Winter 1	22.2089	22.4366	TBP	Winter 1	29.2194	29.679	7.24239	1.65024	3.13885		SUMMER
Eff	Summer 1	22.0152		TBP	Summer 1	27.8091						0.558636	0.685462	0.261704	-1.26128	-0.378814	0.134289	2.96059e-16	0.721495	0.294549
Eff	Summer 1	22.1233		TBP	Summer 1	27.6983
Eff	Summer 1	22.2009	22.1132	TBP	Summer 1	27.653	27.7201	5.60697	0.558636	1.47288		EFF							AVE	STD DEV	STERR
Eff	Winter 2	26.4441		TBP	Winter 2	30.9171						WINTER	3.13885	0.47525	1.15915	1.06298	0.744094	0.73116	1.21858	0.972672	0.397092
Eff	Winter 2	25.9857		TBP	Winter 2	30.4022						SUMMER	1.47288	1.60822	1.19889	0.417175	0.769069	1.09755	1.09396	0.443318	0.180984
Eff	Winter 2	26.2957	26.2418	TBP	Winter 2	30.9629	30.7607	4.51891	-1.07324	0.47525
Eff	Summer 2	21.8392		TBP	Summer 2	27.4172							Winter	Summer
Eff	Summer 2	21.8514		TBP	Summer 2	27.5927							7.24239	5.60697
Eff	Summer 2	21.9187	21.8698	TBP	Summer 2	27.8009	27.6036	5.73379	0.685462	1.60822			4.51891	5.73379
Eff	Winter 3	22.0164		TBP	Winter 3	27.7076							5.80522	5.31004
Eff	Winter 3	22.3416		TBP	Winter 3	27.894							5.68026	3.78706
Eff	Winter 3	21.9334	22.0971	TBP	Winter 3	28.1054	27.9023	5.80522	0.213073	1.15915			5.1657	4.66952
Eff	Summer 3	21.4759		TBP	Summer 3	26.9414							5.14041	5.18262
Eff	Summer 3	21.6472		TBP	Summer 3	26.7611							5.59215	5.04833
Eff	Summer 3	21.2936	21.4723	TBP	Summer 3	26.6444	26.7823	5.31004	0.261704	1.19889
Eff	Winter 4	23.784		TBP	Winter 4	29.3685
Eff	Winter 4	23.6582		TBP	Winter 4	29.6129
Eff	Winter 4	24.0473	23.8298	TBP	Winter 4	29.5489	29.5101	5.68026	0.088114	1.06298
Eff	Summer 4	23.4768		TBP	Summer 4	29.2565
Eff	Summer 4	25.508		TBP	Summer 4	27.3456
Eff	Summer 4	25.5758	24.8535	TBP	Summer 4	29.3197	28.6406	3.78706	-1.26128	0.417175
Eff	Winter 5	21.7497		TBP	Winter 5	26.9025
Eff	Winter 5	21.9376		TBP	Winter 5	27.1601
Eff	Winter 5	21.6503	21.7792	TBP	Winter 5	26.772	26.9449	5.1657	-0.426444	0.744094
Eff	Summer 5	23.7159		TBP	Summer 5	28.7006
Eff	Summer 5	23.6293		TBP	Summer 5	27.9695
Eff	Summer 5	23.7597	23.7016	TBP	Summer 5	28.4433	28.3711	4.66952	-0.378814	0.769069
Eff	Winter 6	21.1096		TBP	Winter 6	26.6661
Eff	Winter 6	21.8094		TBP	Winter 6	26.5212
Eff	Winter 6	21.1772	21.3654	TBP	Winter 6	26.3301	26.5058	5.14041	-0.45174	0.73116
Eff	Summer 6	22.24		TBP	Summer 6	27.6712
Eff	Summer 6	22.4229		TBP	Summer 6	27.5683
Eff	Summer 6	22.5582	22.407	TBP	Summer 6	27.5294	27.5896	5.18262	0.134289	1.09755

## Sheet: CheA87a
Gene	Sample	CT	CT Mean	Gene	Sample	CT	CT Mean	dCT	ddCT
CheA87a	Winter 1	34.1219		TBP	Winter 1	30.1791
CheA87a	Winter 1	33.2548		TBP	Winter 1	29.6386						WINTER						AVE	STD DEV	STERR
CheA87a	Winter 1	33.6129	33.6632	TBP	Winter 1	29.2194	29.679	-3.98417	-1.75073	0.297151		-1.75073	-1.51823	1.71444	1.07701	0.0541798	0.423326	0	1.38935	0.567201
CheA87a	Summer 1	29.3397		TBP	Summer 1	27.8091
CheA87a	Summer 1	29.4072		TBP	Summer 1	27.6983						SUMMER
CheA87a	Summer 1	29.6494	29.4654	TBP	Summer 1	27.653	27.7201	-1.74531	0.488126	1.40262		0.488126	3.26064	-1.46668	-5.43402	-1.45499	-0.731225	-0.889692	2.84437	1.16121
CheA87a	Winter 2	34.2817		TBP	Winter 2	30.9171
CheA87a	Winter 2	34.8792		TBP	Winter 2	30.4022
CheA87a	Winter 2	34.3763	34.5124	TBP	Winter 2	30.9629	30.7607	-3.75167	-1.51823	0.349114
CheA87a	Summer 2	33.1339		TBP	Summer 2	27.4172						Winter	Summer
CheA87a	Summer 2	12.9432		TBP	Summer 2	27.5927						-3.98417	-1.74531
CheA87a	Summer 2	33.652	26.5764	TBP	Summer 2	27.8009	27.6036	1.0272	3.26064	9.58405		-3.75167	1.0272
CheA87a	Winter 3	28.008		TBP	Winter 3	27.7076						-0.518997	-3.70012
CheA87a	Winter 3	28.395		TBP	Winter 3	27.894						-1.15643	-7.66746
CheA87a	Winter 3	28.861	28.4213	TBP	Winter 3	28.1054	27.9023	-0.518997	1.71444	3.2817		-2.17926	-3.68843
CheA87a	Summer 3	30.5862		TBP	Summer 3	26.9414						-1.81011	-2.96467
CheA87a	Summer 3	30.393		TBP	Summer 3	26.7611						-2.23344	-3.12313
CheA87a	Summer 3	30.4681	30.4824	TBP	Summer 3	26.6444	26.7823	-3.70012	-1.46668	0.361814
CheA87a	Winter 4	30.7942		TBP	Winter 4	29.3685
CheA87a	Winter 4	30.5546		TBP	Winter 4	29.6129						CHEA87a							AVE	STD DEV	STERR
CheA87a	Winter 4	30.6508	30.6665	TBP	Winter 4	29.5489	29.5101	-1.15643	1.07701	2.10966		WINTER	0.297151	0.349114	3.2817	2.10966	1.03827	1.34102	1.40282	1.14012	0.465451
CheA87a	Summer 4	35.5123		TBP	Summer 4	29.2565						SUMMER	1.40262	9.58405	0.361814	0.0231311	0.364759	0.602392	2.05646	3.71684	1.51739
CheA87a	Summer 4	38.6828		TBP	Summer 4	27.3456
CheA87a	Summer 4	34.7291	36.3081	TBP	Summer 4	29.3197	28.6406	-7.66746	-5.43402	0.0231311
CheA87a	Winter 5	27.5313		TBP	Winter 5	26.9025
CheA87a	Winter 5	28.64		TBP	Winter 5	27.1601
CheA87a	Winter 5	31.2011	29.1241	TBP	Winter 5	26.772	26.9449	-2.17926	0.0541798	1.03827
CheA87a	Summer 5	31.1727		TBP	Summer 5	28.7006
CheA87a	Summer 5	31.8257		TBP	Summer 5	27.9695
CheA87a	Summer 5	33.1803	32.0596	TBP	Summer 5	28.4433	28.3711	-3.68843	-1.45499	0.364759
CheA87a	Winter 6	28.1254		TBP	Winter 6	26.6661
CheA87a	Winter 6	28.4117		TBP	Winter 6	26.5212
CheA87a	Winter 6	28.4107	28.3159	TBP	Winter 6	26.3301	26.5058	-1.81011	0.423326	1.34102
CheA87a	Summer 6	30.4222		TBP	Summer 6	27.6712
CheA87a	Summer 6	31.0957		TBP	Summer 6	27.5683
CheA87a	Summer 6	30.1451	30.5543	TBP	Summer 6	27.5294	27.5896	-2.96467	-0.731225	0.602392
CheA87a	Winter 1	34.6842		TBP	Winter 1	30.1791
CheA87a	Winter 1	34.138		TBP	Winter 1	29.6386
CheA87a	Winter 1	34.7973	34.5398	TBP	Winter 1	29.2194	29.679
CheA87a	Summer 1	30.5751		TBP	Summer 1	27.8091
CheA87a	Summer 1	29.9192		TBP	Summer 1	27.6983
CheA87a	Summer 1	30.3336	30.276	TBP	Summer 1	27.653	27.7201
CheA87a	Winter 2	35.461		TBP	Winter 2	30.9171
CheA87a	Winter 2	36.2384		TBP	Winter 2	30.4022
CheA87a	Winter 2	35.4907	35.73	TBP	Winter 2	30.9629	30.7607
CheA87a	Summer 2	32.451		TBP	Summer 2	27.4172
CheA87a	Summer 2	33.4453		TBP	Summer 2	27.5927
CheA87a	Summer 2	31.9577	32.618	TBP	Summer 2	27.8009	27.6036
CheA87a	Winter 3	28.8187		TBP	Winter 3	27.7076
CheA87a	Winter 3	29.8266		TBP	Winter 3	27.894
CheA87a	Winter 3	28.7698	29.1384	TBP	Winter 3	28.1054	27.9023
CheA87a	Summer 3	31.0171		TBP	Summer 3	26.9414
CheA87a	Summer 3	30.898		TBP	Summer 3	26.7611
CheA87a	Summer 3	31.3548	31.0899	TBP	Summer 3	26.6444	26.7823
CheA87a	Winter 4	32.5335		TBP	Winter 4	29.3685
CheA87a	Winter 4	32.1215		TBP	Winter 4	29.6129
CheA87a	Winter 4	31.7276	32.1276	TBP	Winter 4	29.5489	29.5101
CheA87a	Summer 4	38.9517		TBP	Summer 4	29.2565
CheA87a	Summer 4	36.1658		TBP	Summer 4	27.3456
CheA87a	Summer 4	36.6501	37.2559	TBP	Summer 4	29.3197	28.6406
CheA87a	Winter 5	29.567		TBP	Winter 5	26.9025
CheA87a	Winter 5	29.1329		TBP	Winter 5	27.1601
CheA87a	Winter 5	28.4722	29.0574	TBP	Winter 5	26.772	26.9449
CheA87a	Summer 5	32.6575		TBP	Summer 5	28.7006
CheA87a	Summer 5	32.8056		TBP	Summer 5	27.9695
CheA87a	Summer 5	34.5864	33.3498	TBP	Summer 5	28.4433	28.3711
CheA87a	Winter 6	29.3277		TBP	Winter 6	26.6661
CheA87a	Winter 6	29.5256		TBP	Winter 6	26.5212
CheA87a	Winter 6	29.2926	29.382	TBP	Winter 6	26.3301	26.5058
CheA87a	Summer 6	29.4296		TBP	Summer 6	27.6712
CheA87a	Summer 6	29.8615		TBP	Summer 6	27.5683
CheA87a	Summer 6	29.7891	29.6934	TBP	Summer 6	27.5294	27.5896

## Sheet: Obp83ef
Gene	Sample	CT	CT Mean	Gene	Sample	CT	CT Mean	dCT	ddCT
Obp83ef	Winter 1	32.1681		TBP	Winter 1	30.1791
Obp83ef	Winter 1	30.8361		TBP	Winter 1	29.6386						WINTER						AVE	STD DEV	STERR
Obp83ef	Winter 1	31.1496	31.3846	TBP	Winter 1	29.2194	29.679	-1.70556	-0.744545	0.596856		-0.744545	-0.808411	1.95745	-0.054563	0.109939	-0.459869	0	1.02626	0.418968
Obp83ef	Summer 1	28.1504		TBP	Summer 1	27.8091
Obp83ef	Summer 1	28.1448		TBP	Summer 1	27.6983						SUMMER
Obp83ef	Summer 1	28.2717	28.189	TBP	Summer 1	27.653	27.7201	-0.468849	0.492165	1.40655		0.492165	1.16657	1.55453	-0.700219	-0.32332		0.437946	0.955974	0.427525
Obp83ef	Winter 2	32.4451		TBP	Winter 2	30.9171
Obp83ef	Winter 2	32.2455		TBP	Winter 2	30.4022
Obp83ef	Winter 2	32.8998	32.5302	TBP	Winter 2	30.9629	30.7607	-1.76943	-0.808411	0.57101
Obp83ef	Summer 2	27.6034		TBP	Summer 2	27.4172						Winter	Summer
Obp83ef	Summer 2	27.0251		TBP	Summer 2	27.5927						-1.70556	-0.468849
Obp83ef	Summer 2	27.5656	27.398	TBP	Summer 2	27.8009	27.6036	0.205558	1.16657	2.24478		-1.76943	0.205558
Obp83ef	Winter 3	27.2081		TBP	Winter 3	27.7076						0.996436	0.593519
Obp83ef	Winter 3	26.8611		TBP	Winter 3	27.894						-1.01558	-1.66123
Obp83ef	Winter 3	26.6485	26.9059	TBP	Winter 3	28.1054	27.9023	0.996436	1.95745	3.88375		-0.851075	-1.28433
Obp83ef	Summer 3	26.2555		TBP	Summer 3	26.9414						-1.42088
Obp83ef	Summer 3	26.1618		TBP	Summer 3	26.7611						-0.961014	-0.523068
Obp83ef	Summer 3	26.1491	26.1888	TBP	Summer 3	26.6444	26.7823	0.593519	1.55453	2.93738
Obp83ef	Winter 4	30.3941		TBP	Winter 4	29.3685
Obp83ef	Winter 4	30.7761		TBP	Winter 4	29.6129						Obp83ef							AVE	STD DEV	STERR
Obp83ef	Winter 4	30.4069	30.5257	TBP	Winter 4	29.5489	29.5101	-1.01558	-0.054563	0.962886		WINTER	0.596856	0.57101	3.88375	0.962886	1.07918		1.41874	1.39584	0.62424
Obp83ef	Summer 4	29.8885		TBP	Summer 4	29.2565						SUMMER	1.40655	2.24478	2.93738	0.615479	0.799229		1.60068	0.98136	0.438878
Obp83ef	Summer 4	30.5984		TBP	Summer 4	27.3456
Obp83ef	Summer 4	30.4186	30.3018	TBP	Summer 4	29.3197	28.6406	-1.66123	-0.700219	0.615479
Obp83ef	Winter 5	28.1288		TBP	Winter 5	26.9025
Obp83ef	Winter 5	28.3947		TBP	Winter 5	27.1601
Obp83ef	Winter 5	26.8644	27.796	TBP	Winter 5	26.772	26.9449	-0.851075	0.109939	1.07918
Obp83ef	Summer 5	30.0799		TBP	Summer 5	28.7006
Obp83ef	Summer 5	29.3929		TBP	Summer 5	27.9695
Obp83ef	Summer 5	29.4936	29.6555	TBP	Summer 5	28.4433	28.3711	-1.28433	-0.32332	0.799229
Obp83ef	Winter 6	28.1146		TBP	Winter 6	26.6661
Obp83ef	Winter 6	27.9844		TBP	Winter 6	26.5212
Obp83ef	Winter 6	27.6811	27.9267	TBP	Winter 6	26.3301	26.5058	-1.42088	-0.459869	0.727052
				TBP	Summer 6	27.6712
				TBP	Summer 6	27.5683
				TBP	Summer 6	27.5294	27.5896

## Sheet: Obp83cd
Gene	Sample	CT	CT Mean	Gene	Sample	CT	CT Mean	dCT	ddCT
Obp83cd	Winter 1	31.4045		TBP	Winter 1	30.1791
Obp83cd	Winter 1	32.1876		TBP	Winter 1	29.6386						WINTER						AVE	STD DEV	SEM
Obp83cd	Winter 1	30.5903	31.3941	TBP	Winter 1	29.2194	29.679	-1.7151	-0.190927	0.876042		-0.190927	-0.867242	1.19244	-0.499218	1.36387	-0.998919	0	1.03128	0.421017
Obp83cd	Summer 1	35.1918		TBP	Summer 1	27.8091
Obp83cd	Summer 1	28.9603		TBP	Summer 1	27.6983						SUMMER
Obp83cd	Summer 1	29.6691	31.2737	TBP	Summer 1	27.653	27.7201	-3.55361	-2.02943	0.244952		-2.02943	-0.575923	-0.52551	-1.0906	-0.930005	0.757121	-0.732391	0.909462	0.371286
Obp83cd	Winter 2	31.4558		TBP	Winter 2	30.9171
Obp83cd	Winter 2	34.0456		TBP	Winter 2	30.4022
Obp83cd	Winter 2	33.955	33.1522	TBP	Winter 2	30.9629	30.7607	-2.39142	-0.867242	0.548194
Obp83cd	Summer 2	29.1097		TBP	Summer 2	27.4172						Winter	Summer
Obp83cd	Summer 2	29.7419		TBP	Summer 2	27.5927						-1.7151	-3.55361
Obp83cd	Summer 2	30.2594	29.7037	TBP	Summer 2	27.8009	27.6036	-2.1001	-0.575923	0.670857		-2.39142	-2.1001
Obp83cd	Winter 3	28.1932		TBP	Winter 3	27.7076						-0.331738	-2.04969
Obp83cd	Winter 3	28.6032		TBP	Winter 3	27.894						-2.02339	-2.61477
Obp83cd	Winter 3	27.9059	28.2341	TBP	Winter 3	28.1054	27.9023	-0.331738	1.19244	2.28539		-0.16031	-2.45418
Obp83cd	Summer 3	28.5793		TBP	Summer 3	26.9414						-2.5231	-0.767056
Obp83cd	Summer 3	29.1688		TBP	Summer 3	26.7611						-1.52418	-2.25657
Obp83cd	Summer 3	28.7478	28.832	TBP	Summer 3	26.6444	26.7823	-2.04969	-0.52551	0.694714
Obp83cd	Winter 4	31.6587		TBP	Winter 4	29.3685						Obp83cd							AVE	STD DEV	STERR
Obp83cd	Winter 4	30.8736		TBP	Winter 4	29.6129						WINTER	0.876042	0.548194	2.28539	0.70749	2.57374	0.500375	1.24854	0.928756	0.379163
Obp83cd	Winter 4	32.0682	31.5335	TBP	Winter 4	29.5489	29.5101	-2.02339	-0.499218	0.70749		SUMMER	0.244952	0.670857	0.694714	0.469567	0.524857	1.69011	0.715843	0.504092	0.205795
Obp83cd	Summer 4	30.1457		TBP	Summer 4	29.2565
Obp83cd	Summer 4	29.8634		TBP	Summer 4	27.3456
Obp83cd	Summer 4	33.757	31.2554	TBP	Summer 4	29.3197	28.6406	-2.61477	-1.0906	0.469567
Obp83cd	Winter 5	27.5269		TBP	Winter 5	26.9025
Obp83cd	Winter 5	26.3343		TBP	Winter 5	27.1601
Obp83cd	Winter 5	27.4544	27.1052	TBP	Winter 5	26.772	26.9449	-0.16031	1.36387	2.57374
Obp83cd	Summer 5	30.4708		TBP	Summer 5	28.7006
Obp83cd	Summer 5	30.6076		TBP	Summer 5	27.9695
Obp83cd	Summer 5	31.3976	30.8253	TBP	Summer 5	28.4433	28.3711	-2.45418	-0.930005	0.524857
Obp83cd	Winter 6	28.883		TBP	Winter 6	26.6661
Obp83cd	Winter 6	28.8786		TBP	Winter 6	26.5212
Obp83cd	Winter 6	29.3251	29.0289	TBP	Winter 6	26.3301	26.5058	-2.5231	-0.998919	0.500375
Obp83cd	Summer 6	27.9019		TBP	Summer 6	27.6712
Obp83cd	Summer 6	28.774		TBP	Summer 6	27.5683
Obp83cd	Summer 6	28.3942	28.3567	TBP	Summer 6	27.5294	27.5896	-0.767056	0.757121	1.69011

## Sheet: Graph
CheA87a	Summer 3	30.5862		TBP	Summer 3	26.9414
CheA87a	Summer 3	30.393		TBP	Summer 3	26.7611
CheA87a	Summer 3	30.4681	30.4824	TBP	Summer 3	26.6444	26.7823	-3.70012	0.161201	1.11822
CheA87a	Winter 4	30.7942		TBP	Winter 4	29.3685
CheA87a	Winter 4	30.5546		TBP	Winter 4	29.6129
CheA87a	Winter 4	30.6508	30.6665	TBP	Winter 4	29.5489	29.5101	-1.15643	2.70489	6.5201
CheA87a	Summer 6	30.4222		TBP	Summer 6	27.6712						Winter	Summer
CheA87a	Summer 6	31.0957		TBP	Summer 6	27.5683						-1.15643	-3.70012
CheA87a	Summer 6	30.1451	30.5543	TBP	Summer 6	27.5294	27.5896	-2.96467	0.896657	1.86175		-1.8165	-2.96467
Winter 3	CheA87a	29.5298		Winter 3	TBP	27.9707						-1.71498	-4.0411
Winter 3	CheA87a	29.8851		Winter 3	TBP	27.6992						-1.65407	-5.04561
Winter 3	CheA87a	29.5429	29.6526	Winter 3	TBP	27.8384	27.8361	-1.8165	2.04483	4.12623		-2.76571	-3.55511
Summer 3	CheA87a	30.6363		Summer 3	TBP	26.994						-1.82154	-3.86132
Summer 3	CheA87a	31.6256		Summer 3	TBP	27.1371
Summer 3	CheA87a	31.1073	31.1231	Summer 3	TBP	27.1148	27.082	-4.0411	-0.17978	0.882838
Winter 4	CheA87a	31.0519		Winter 4	TBP	29.6651
Winter 4	CheA87a	31.6863		Winter 4	TBP	29.496						WINTER					AVE	STD DEV	SEM
Winter 4	CheA87a	31.3217	31.3533	Winter 4	TBP	29.754	29.6383	-1.71498	2.14635	4.42705		6.5201	4.12623	4.42705	4.61794	2.13704	4.36567	1.5599	0.697606
Winter 5	CheA87a	28.1217		Winter 5	TBP	27.0047						SUMMER
Winter 5	CheA87a	28.741		Winter 5	TBP	26.5317						1.11822	1.86175	0.882838	0.440041	1.23646	1.10786	0.520001	0.232552
Winter 5	CheA87a	28.2616	28.3747	Winter 5	TBP	26.6256	26.7207	-1.65407	2.20725	4.61794
Summer 5	CheA87a	33.613		Summer 5	TBP	28.1398
Summer 5	CheA87a	33.4499		Summer 5	TBP	28.2673
Summer 5	CheA87a	33.2628	33.4419	Summer 5	TBP	28.7818	28.3963	-5.04561	-1.18429	0.440041
Winter 6	CheA87a	29.6268		Winter 6	TBP	27.3276
Winter 6	CheA87a	29.4844		Winter 6	TBP	27.0944
Winter 6	CheA87a	30.7283	29.9465	Winter 6	TBP	27.1203	27.1808	-2.76571	1.09562	2.13704
Summer 6	CheA87a	31.5278		Summer 6	TBP	28.7015
Summer 6	CheA87a	31.9111		Summer 6	TBP	27.6498
Summer 6	CheA87a	31.5399	31.6596	Summer 6	TBP	27.9622	28.1045	-3.55511	0.306211	1.23646
Summer 3	Obp83ef	26.2555		Summer 3	TBP	26.9414
Summer 3	Obp83ef	26.1618		Summer 3	TBP	26.7611						Winter	Summer
Summer 3	Obp83ef	26.1491	26.1888	Summer 3	TBP	26.6444	26.7823	0.593519	0.592157	1.5075		-1.57456	0.593519
Winter 2	Obp83ef	33.055		Winter 2	TBP	31.8665						-0.853217	-0.257393
Winter 2	Obp83ef	33.185		Winter 2	TBP	31.1521						-0.774984	-0.207365
Winter 2	Obp83ef	33.579	33.273	Winter 2	TBP	32.0767	31.6984	-1.57456	-1.57593	0.335428		-1.15734	0.205558
Summer 2	Obp83ef	28.333		Summer 2	TBP	27.836						-1.28823	-0.327511
Summer 2	Obp83ef	27.806		Summer 2	TBP	27.9404						-1.12967	0.00136163
Summer 2	Obp83ef	28.203	28.114	Summer 2	TBP	27.7935	27.8566	-0.257393	-0.258754	0.835809
Winter 3	Obp83ef	28.541		Winter 3	TBP	27.9707
Winter 3	Obp83ef	28.474		Winter 3	TBP	27.6992
Winter 3	Obp83ef	29.053	28.6893	Winter 3	TBP	27.8384	27.8361	-0.853217	-0.854579	0.553027		WINTER					AVE	STD DEV	SEM
Summer 3	Obp83ef	27.441		Summer 3	TBP	26.994						0.335428	0.553027	0.583844	0.447917	0.409067	0.465856	0.102565	0.0458684
Summer 3	Obp83ef	27.14		Summer 3	TBP	27.1371						SUMMER
Summer 3	Obp83ef	27.287	27.2893	Summer 3	TBP	27.1148	27.082	-0.207365	-0.208727	0.865301		1.5075	0.835809	0.865301	1.15204	0.796158	1.03136	0.301002	0.134612
Winter 4	Obp83ef	30.491		Winter 4	TBP	29.6651
Winter 4	Obp83ef	30.2		Winter 4	TBP	29.496
Winter 4	Obp83ef	30.549	30.4133	Winter 4	TBP	29.754	29.6383	-0.774984	-0.776345	0.583844
Winter 5	Obp83ef	27.921		Winter 5	TBP	27.0047
Winter 5	Obp83ef	27.974		Winter 5	TBP	26.5317
Winter 5	Obp83ef	27.739	27.878	Winter 5	TBP	26.6256	26.7207	-1.15734	-1.1587	0.447917
Summer 2	Obp83ef	27.6034		Summer 2	TBP	27.4172
Summer 2	Obp83ef	27.0251		Summer 2	TBP	27.5927
Summer 2	Obp83ef	27.5656	27.398	Summer 2	TBP	27.8009	27.6036	0.205558	0.204197	1.15204
Winter 6	Obp83ef	28.459		Winter 6	TBP	27.3276
Winter 6	Obp83ef	28.563		Winter 6	TBP	27.0944
Winter 6	Obp83ef	28.385	28.469	Winter 6	TBP	27.1203	27.1808	-1.28823	-1.28959	0.409067
Summer 6	Obp83ef	28.67		Summer 6	TBP	28.7015
Summer 6	Obp83ef	28.337		Summer 6	TBP	27.6498
Summer 6	Obp83ef	28.289	28.432	Summer 6	TBP	27.9622	28.1045	-0.327511	-0.328873	0.796158
Obp44a	Summer 2	19.006		Summer 2	TBP	27.4172
Obp44a	Summer 2	18.4533		Summer 2	TBP	27.5927
Obp44a	Summer 2	19.2395	18.8996	Summer 2	TBP	27.8009	27.6036	8.70398	0.630402	1.548		Winter	Summer
Obp44a	Winter 3	16.82		Winter 3	TBP	27.7076						11.645	8.70398
Obp44a	Winter 3	16.1611		Winter 3	TBP	27.894						10.9885	8.09727
Obp44a	Winter 3	15.791	16.2574	Winter 3	TBP	28.1054	27.9023	11.645	3.57138	11.8876		10.912	8.49891
Obp44a	Summer 3	18.5344		TBP	Summer 3	26.9414						10.5612	7.08114
Obp44a	Summer 3	18.734		TBP	Summer 3	26.7611						11.485	7.98658
Obp44a	Summer 3	18.7866	18.685	TBP	Summer 3	26.6444	26.7823	8.09727	0.0236937	1.01656		11.1183	8.07358
Obp44a	Winter 4	18.7477		Winter 4	TBP	29.3685
Obp44a	Winter 4	18.3039		Winter 4	TBP	29.6129
Obp44a	Winter 4	18.5131	18.5216	Winter 4	TBP	29.5489	29.5101	10.9885	2.91496	7.54204
Obp44a	Summer 1	19.1769		TBP	Summer 1	27.8091
Obp44a	Summer 1	19.3479		TBP	Summer 1	27.6983
Obp44a	Summer 1	19.1387	19.2212	TBP	Summer 1	27.653	27.7201	8.49891	0.425333	1.34288
Obp44a	Winter 5	16.4867		Winter 5	TBP	26.9025						WINTER					AVE	STD DEV	SEM
Obp44a	Winter 5	16.4173		Winter 5	TBP	27.1601						11.8876	7.54204	7.15219	5.60857	10.64	8.56607	2.32929	1.04169
Obp44a	Winter 5	15.1948	16.0329	Winter 5	TBP	26.772	26.9449	10.912	2.83838	7.15219		SUMMER
Obp44a	Summer 5	21.7198		Summer 5	TBP	28.7006						1.548	1.01656	1.34288	0.50263	0.941479	1.07031	0.35895	0.160527
Obp44a	Summer 5	21.8463		Summer 5	TBP	27.9695
Obp44a	Summer 5	20.3039	21.29	Summer 5	TBP	28.4433	28.3711	7.08114	-0.99243	0.50263
Obp44a	Winter 6	15.8835		Winter 6	TBP	26.6661
Obp44a	Winter 6	15.7369		Winter 6	TBP	26.5212
Obp44a	Winter 6	16.2133	15.9446	Winter 6	TBP	26.3301	26.5058	10.5612	2.48763	5.60857
Obp44a	Summer 6	19.5927		Summer 6	TBP	27.6712
Obp44a	Summer 6	19.8151		Summer 6	TBP	27.5683
Obp44a	Summer 6	19.4013	19.6031	Summer 6	TBP	27.5294	27.5896	7.98658	-0.0869986	0.941479
Obp44a	Winter 3	16.3724		Winter 3	TBP	27.7076
Obp44a	Winter 3	16.3518		Winter 3	TBP	27.894
Obp44a	Winter 3	16.5279	16.4173	Winter 3	TBP	28.1054	27.9023	11.485	3.41143	10.64

## Sheet: Statistics
t-Test: Two-Sample Assuming Unequal Variances		CheA87a
	Variable 1	Variable 2
Mean	4.36567	1.10786
Variance	2.43327	0.270401
Observations	5	5
Hypothesized Mean Difference	0
df	5
t Stat	4.43031
P(T<=t) one-tail	0.00341306
t Critical one-tail	2.01505
P(T<=t) two-tail	0.00682611
t Critical two-tail	2.57058
t-Test: Two-Sample Assuming Unequal Variances		Obp83ef
	Variable 1	Variable 2
Mean	0.4658	1.0312
Variance	0.0105567	0.0905057
Observations	5	5
Hypothesized Mean Difference	0
df	5
t Stat	-3.97691
P(T<=t) one-tail	0.00528158
t Critical one-tail	2.01505
P(T<=t) two-tail	0.0105632
t Critical two-tail	2.57058
t-Test: Two-Sample Assuming Unequal Variances		Obp44a
	Variable 1	Variable 2
Mean	8.56607	1.07031
Variance	6.782	0.161057
Observations	5	5
Hypothesized Mean Difference	0
df	4
t Stat	6.361
P(T<=t) one-tail	0.00156549
t Critical one-tail	2.13185
P(T<=t) two-tail	0.00313097
t Critical two-tail	2.77645
